# Supplementary material for: Biosynthesis of a sulfated exopolysaccharide, synechan, and bloom formation in the model cyanobacterium Synechocystis sp. strain PCC 6803
Source: eLife. 2021 Jun 15;10:e66538. doi: 10.7554/eLife.66538 (PMC8205485; doi:10.7554/eLife.66538)
Supplement: Figure 1—source data 1. [file elife-66538-fig1-data1.xlsx]

## Sheet: Sheet1
Glc (μg) per 1.0 × 108 cells
	CPS		EPS		”free”
n	WT	Δslr5054	WT	Δslr5054	WT	Δslr5054
1	0.190208	0.0790247	0.582859	0.0348578	1.62465	1.19306
2	0.221217	0.0970765	0.534686	0.0681873	1.36305	1.43292
3	0.260284	0.202005	0.459167	0.0423929	1.85696	0.970946
4	0.153966	0.151342
5	0.102586	0.109653
6	0.129841	0.114398
Ave	0.17635	0.125583	0.525571	0.0484793	1.61488	1.19897
SD	0.0589157	0.044414	0.0623475	0.0174785	0.247101	0.231043
