# Supplementary material for: Biosynthesis of a sulfated exopolysaccharide, synechan, and bloom formation in the model cyanobacterium Synechocystis sp. strain PCC 6803
Source: eLife. 2021 Jun 15;10:e66538. doi: 10.7554/eLife.66538 (PMC8205485; doi:10.7554/eLife.66538)
Supplement: Figure 2—source data 1. [file elife-66538-fig2-data1.xlsx]

## Sheet: Sheet1
Glc (μg) per 1.0 × 108 cells
n	WT(31°C)	ΔxssK~M	ΔxssA	ΔxssB	ΔxssC	ΔxssE	ΔxssF	ΔxssG	ΔxssH	ΔxssI	ΔxssJ	ΔxssK	ΔxssM	ΔxssN	ΔxssO	ΔxssP	ΔxssQ	ΔxssR	ΔxssS	ΔxssR-S	ΔxssK~M +ΔxssS	OX-xssR	OX-xssQ	ΔxssQ +OX-xssR	ΔxssR +OX-xssQ	WT (20°C)
#1	0.582859	0.0348578	0.102505	0.0733023	0.160921	0.427336	0.114653	0.0853371	0.0778866	0.0955615	0.197219	0.0486648	0.0347015	0.0980252	0.184285	0.0276718	0.0266453	0.0695391	10.0889	0.0534777	0.0364439	10.2585	5.91901	0.0636814	3.39132	2.27512
#2	0.534686	0.0681873	0.0298586	0.0178403	0.124371	0.514783	0.0991577	0.117905	0.179862	0.0811671	0.246756	0.0238421	0.0344118	0.102695	0.163701	0.0461759	0.0355599	0.052736	10.0561	0.0676916	0.0590614	10.6815	6.07507	0.0591798	7.33066	1.08752
#3	0.459167	0.0423929	0.0308267	0.0297639	0.157676	0.265116	0.106084	0.113234	0.0787617	0.163411	0.228443	0.0375459	0.0772724	0.143145	0.134055	0.0429803	0.0456779	0.0540901	9.16555	0.0650089	0.0362909	10.337	10.0832	0.107517	3.78951	2.01802
#4																										1.47606
#5																										1.75106
#6																										1.16582
	WT(31°C)	ΔxssK~M	ΔxssA	ΔxssB	ΔxssC	ΔxssE	ΔxssF	ΔxssG	ΔxssH	ΔxssI	ΔxssJ	ΔxssK	ΔxssM	ΔxssN	ΔxssO	ΔxssP	ΔxssQ	ΔxssR	ΔxssS	ΔxssR-S	ΔxssK~M +ΔxssS	OX-xssR	OX-xssQ	ΔxssQ +OX-xssR	ΔxssR +OX-xssQ	WT (20°C)
Ave	0.525571	0.0484793	0.0543969	0.0403022	0.147656	0.402412	0.106631	0.105492	0.11217	0.11338	0.224139	0.0366843	0.0487953	0.114622	0.16068	0.0389427	0.0359611	0.0587884	9.77019	0.0620594	0.043932	10.4257	7.35909	0.0767929	4.83716	1.62893
SD	0.0623475	0.0174785	0.0416659	0.0291942	0.0202303	0.126686	0.00776202	0.0176102	0.0586248	0.0439217	0.0250472	0.0124338	0.0246624	0.024812	0.0252508	0.00989079	0.00952262	0.00933498	0.523894	0.00755203	0.0131026	0.225033	2.36042	0.0267033	2.16859	0.472193
/WT(31°C) (%)	100	9.22413	10.3501	7.66827	28.0944	76.5666	20.2887	20.0719	21.3426	21.5727	42.6468	6.97989	9.28424	21.809	30.5725	7.4096	6.84229	11.1856	1858.97	11.808	8.35892	1983.69	1400.21	14.6113	920.364	309.936
