# Supplementary material for: Biosynthesis of a sulfated exopolysaccharide, synechan, and bloom formation in the model cyanobacterium Synechocystis sp. strain PCC 6803
Source: eLife. 2021 Jun 15;10:e66538. doi: 10.7554/eLife.66538 (PMC8205485; doi:10.7554/eLife.66538)
Supplement: Figure 3—figure supplement 1—source data 1. — PCC 6803 wild type (WT), ΔxssS, and ΔxssQ. [file elife-66538-fig3-figsupp1-data1.xlsx]

## Sheet: 6803WTvsΔxssQvsΔxssS
No.	Name	Chromosome	Region	Gene length	product	note	Protein id	ΔxssQ/WT_RPKM	ΔxssS/WT_RPKM	WT_RPKM	WT_Unique gene reads	ΔxssQ_RPKM	ΔxssQ_Unique gene reads	ΔxssS_RPKM	ΔxssS_Unique gene reads
34	MYO_1340	CP003265	44442..44885	444	hypothetical protein	similar to slr1493	AGF50301.1	#DIV/0!	#DIV/0!	0	0	1.21605	1	3.46848	4
42	MYO_1420	CP003265	complement(52260..53108)	849	transposase	similar to sll1397	AGF50309.1	#DIV/0!	#DIV/0!	0	0	3.81573	2	1.36043	1
108	MYO_11080	CP003265	complement(123989..124348)	360	transposase	similar to sll0699	AGF50375.1	#DIV/0!	#DIV/0!	0	0	1.49979	1	2.1389	1
386	MYO_13920	CP003265	complement(421867..422361)	495	transposase	similar to sll0651	AGF50653.1	#DIV/0!	#DIV/0!	0	0	3.27228	1	1.55556	2
522	MYO_15290	CP003265	574064..574966	903	hypothetical protein	similar to slr2037	AGF50789.1	#DIV/0!	#DIV/0!	0	0	2.98962	5	1.70543	4
548	MYO_15550	CP003265	complement(605043..605537)	495	transposase	similar to sll1930	AGF50815.1	#DIV/0!	#DIV/0!	0	0	0	0	0	0
993	MYO_110060	CP003265	1097978..1098826	849	transposase	similar to slr1357	AGF51260.1	#DIV/0!	#DIV/0!	0	0	4.45169	1	1.36043	2
1323	MYO_113380	CP003265	1462277..1462771	495	transposase	similar to slr1716	AGF51590.1	#DIV/0!	#DIV/0!	0	0	3.27228	3	2.33334	3
1341	MYO_113560	CP003265	1481866..1482072	207	transposase	similar to ssr2898	AGF51608.1	#DIV/0!	#DIV/0!	0	0	0	0	1.85991	1
1401	MYO_114170	CP003265	complement(1552398..1552892)	495	transposase	similar to sll1984	AGF51668.1	#DIV/0!	#DIV/0!	0	0	0	0	0	0
1402	MYO_114180	CP003265	complement(1552886..1553245)	360	transposase	similar to sll1983	AGF51669.1	#DIV/0!	#DIV/0!	0	0	0	0	1.06945	1
1424	MYO_114400	CP003265	complement(1579055..1579270)	216	resolvase	similar to ssl2789	AGF51691.1	#DIV/0!	#DIV/0!	0	0	4.99932	2	0	0
1457	MYO_114730	CP003265	1615373..1615888	516	transposase	similar to slr1524	AGF51724.1	#DIV/0!	#DIV/0!	0	0	0	0	0	0
1465	MYO_114820	CP003265	complement(1621599..1622117)	519	transposase	similar to sll1999	AGF51732.1	#DIV/0!	#DIV/0!	0	0	0	0	2.22544	2
1466	MYO_114830	CP003265	complement(1622192..1623040)	849	transposase	similar to sll1998	AGF51733.1	#DIV/0!	#DIV/0!	0	0	0	0	0	0
1467	MYO_114840	CP003265	complement(1623097..1623564)	468	transposase	similar to sll1997	AGF51734.1	#DIV/0!	#DIV/0!	0	0	10.3832	1	5.75857	0
1470	MYO_114870	CP003265	1624634..1624993	360	transposase	similar to slr2112	AGF51737.1	#DIV/0!	#DIV/0!	0	0	4.49938	2	0	0
1471	MYO_114880	CP003265	1624987..1625481	495	transposase	similar to slr2113	AGF51738.1	#DIV/0!	#DIV/0!	0	0	0	0	0	0
1572	MYO_115910	CP003265	complement(1724388..1724747)	360	transposase	similar to sll1256	AGF51839.1	#DIV/0!	#DIV/0!	0	0	0	0	0	0
1728	MYO_117500	CP003265	complement(1899854..1899949)	96	transposase	similar to sll1437	AGF51995.1	#DIV/0!	#DIV/0!	0	0	0	0	0	0
1729	MYO_117510	CP003265	complement(1900342..1900701)	360	transposase	similar to sll1436	AGF51996.1	#DIV/0!	#DIV/0!	0	0	0	0	0	0
1785	MYO_118070	CP003265	1959908..1960069	162	ABC transporter	similar to ssr2802	AGF52052.1	#DIV/0!	#DIV/0!	0	0	6.66576	2	4.75311	2
1927	MYO_119520	CP003265	2121564..2122241	678	hypothetical protein	similar to slr0285	AGF52194.1	#DIV/0!	#DIV/0!	0	0	2.38905	3	1.1357	2
1994	MYO_120200	CP003265	2207893..2208195	303	transposase	similar to slr0166	AGF52261.1	#DIV/0!	#DIV/0!	0	0	0	0	1.27063	1
2020	MYO_120470	CP003265	2233181..2233675	495	transposase	similar to slr1937	AGF52287.1	#DIV/0!	#DIV/0!	0	0	1.09076	1	0.777781	1
2097	MYO_121250	CP003265	complement(2325660..2325962)	303	transposase	similar to sll0161	AGF52364.1	#DIV/0!	#DIV/0!	0	0	10.6916	2	0	0
2098	MYO_121260	CP003265	complement(2325883..2326137)	255	transposase	similar to ssl0296	AGF52365.1	#DIV/0!	#DIV/0!	0	0	2.11736	0	1.50981	0
2191	MYO_122200	CP003265	complement(2442010..2442693)	684	transposase	similar to sll0315	AGF52458.1	#DIV/0!	#DIV/0!	0	0	2.3681	1	0	0
2251	MYO_122860	CP003265	complement(2521840..2522334)	495	transposase	similar to sll0201	AGF52518.1	#DIV/0!	#DIV/0!	0	0	1.09076	1	0	0
2252	MYO_122870	CP003265	complement(2522328..2522687)	360	transposase	similar to sll0200	AGF52519.1	#DIV/0!	#DIV/0!	0	0	0	0	0	0
2260	MYO_122950	CP003265	2531373..2532221	849	transposase	similar to slr0230	AGF52527.1	#DIV/0!	#DIV/0!	0	0	0	0	0	0
2426	MYO_124630	CP003265	complement(2708687..2708905)	219	hypothetical protein	similar to ssl0738	AGF52693.1	#DIV/0!	#DIV/0!	0	0	2.46542	1	1.758	1
2478	MYO_125150	CP003265	2771749..2771994	246	hypothetical protein	similar to ssr1527	AGF52745.1	#DIV/0!	#DIV/0!	0	0	0	0	3.1301	2
2519	MYO_125570	CP003265	complement(2814259..2814378)	120	hypothetical protein	similar to sgl0001	AGF52786.1	#DIV/0!	#DIV/0!	0	0	4.49938	1	0	0
2679	MYO_127180	CP003265	complement(2995079..2995348)	270	transposase	similar to ssl0172	AGF52946.1	#DIV/0!	#DIV/0!	0	0	5.99918	3	0	0
2763	MYO_128020	CP003265	3093316..3093600	285	transposase	similar to ssr1175	AGF53030.1	#DIV/0!	#DIV/0!	0	0	1.89448	1	2.70177	2
2764	MYO_128030	CP003265	3093656..3094441	786	transposase	similar to slr0703	AGF53031.1	#DIV/0!	#DIV/0!	0	0	2.74772	1	6.85754	5
2765	MYO_128040	CP003265	3094543..3094647	105	transposase	similar to smr0002	AGF53032.1	#DIV/0!	#DIV/0!	0	0	0	0	0	0
2766	MYO_128050	CP003265	3094704..3095552	849	transposase	similar to slr0704	AGF53033.1	#DIV/0!	#DIV/0!	0	0	0	0	3.17434	2
2767	MYO_128060	CP003265	3095693..3095986	294	transposase	similar to ssr1176	AGF53034.1	#DIV/0!	#DIV/0!	0	0	0	0	1.30953	0
3080	MYO_131280	CP003265	complement(3480714..3481919)	1206	hypothetical protein	similar to sll0448	AGF53347.1	#DIV/0!	#DIV/0!	0	0	2.6862	6	1.27695	4
3168	MYO_290	CP003266 (pSYSM_M)	complement(15639..15812)	174	hypothetical protein	similar to ssl5008	AGF53435.1	#DIV/0!	#DIV/0!	0	0	0	0	0	0
3251	MYO_2920	CP003266 (pSYSM_M)	complement(90353..90601)	249	hypothetical protein	similar to ssl5091	AGF53518.1	#DIV/0!	#DIV/0!	0	0	4.33676	2	0	0
3391	MYO_41020	CP003267 (pSYSA_M)	98223..98582	360	transposase	similar to slr7104	AGF53658.1	#DIV/0!	#DIV/0!	0	0	0	0	2.1389	1
3392	MYO_41030	CP003267 (pSYSA_M)	98576..99070	495	transposase	similar to slr7105	AGF53659.1	#DIV/0!	#DIV/0!	0	0	0	0	0	0
3434	MYO_5420	CP003268 (pSYSG_M)	complement(38396..38599)	204	transposase	similar to ssl8041	AGF53701.1	#DIV/0!	#DIV/0!	0	0	5.29339	2	0	0
3435	MYO_5430	CP003268 (pSYSG_M)	complement(38568..39062)	495	transposase	similar to sll8042	AGF53702.1	#DIV/0!	#DIV/0!	0	0	0	0	0	0
3439	MYO_5470	CP003268 (pSYSG_M)	41409..41903	495	transposase	similar to slr8046	AGF53706.1	#DIV/0!	#DIV/0!	0	0	1.09076	1	0.777781	1
3446	MYO_350	CP003269 (pSYSX_M)	4050..4406	357	hypothetical protein	similar to slr6004	AGF53713.1	#DIV/0!	#DIV/0!	0	0	3.0248	2	7.54905	1
3462	MYO_3210	CP003269 (pSYSX_M)	22192..22410	219	hypothetical protein	similar to ssr6020	AGF53729.1	#DIV/0!	#DIV/0!	0	0	2.46542	0	5.274	0
3466	MYO_3250	CP003269 (pSYSX_M)	24263..24442	180	hypothetical protein	similar to ssr6024	AGF53733.1	#DIV/0!	#DIV/0!	0	0	0	0	2.1389	0
3467	MYO_3260	CP003269 (pSYSX_M)	24638..25147	510	hypothetical protein	similar to slr6025	AGF53734.1	#DIV/0!	#DIV/0!	0	0	0	0	0	0
3474	MYO_3330	CP003269 (pSYSX_M)	31354..31572	219	hypothetical protein	similar to ssr6032	AGF53741.1	#DIV/0!	#DIV/0!	0	0	0	0	0	0
3503	MYO_3620	CP003269 (pSYSX_M)	complement(57700..57906)	207	hypothetical protein	similar to ssl6061	AGF53770.1	#DIV/0!	#DIV/0!	0	0	0	0	0	0
3525	MYO_3840	CP003269 (pSYSX_M)	78981..79160	180	hypothetical protein	similar to ssr6083	AGF53792.1	#DIV/0!	#DIV/0!	0	0	2.99959	0	0	0
3528	MYO_3870	CP003269 (pSYSX_M)	80256..80447	192	hypothetical protein	similar to ssr6086	AGF53795.1	#DIV/0!	#DIV/0!	0	0	0	0	0	0
3538	MYO_3970	CP003269 (pSYSX_M)	89982..91103	1122	hypothetical protein	similar to slr6096	AGF53805.1	#DIV/0!	#DIV/0!	0	0	0.962435	2	0	0
3547	MYO_31060	CP003269 (pSYSX_M)	99535..100551	1017	transposase	similar to slr6105	AGF53814.1	#DIV/0!	#DIV/0!	0	0	0	0	0	0
3554	MYO_810	CP003271 (pCB2.4_M)	join(1596..2345,1..429)	1179	hypothetical protein		AGF53821.1	#DIV/0!	#DIV/0!	0	0	0	0	1.63275	5
3555	MYO_820	CP003271 (pCB2.4_M)	850..1221	372	hypothetical protein		AGF53822.1	#DIV/0!	#DIV/0!	0	0	0	0	1.03495	1
3556	MYO_830	CP003271 (pCB2.4_M)	1221..1496	276	hypothetical protein		AGF53823.1	#DIV/0!	#DIV/0!	0	0	0	0	0	0
3557	MYO_610	CP003272 (pCC5.2_M)	complement(3..296)	294	hypothetical protein		AGF53824.1	#DIV/0!	#DIV/0!	0	0	0	0	3.92859	3
3558	MYO_620	CP003272 (pCC5.2_M)	692..1045	354	hypothetical protein		AGF53825.1	#DIV/0!	#DIV/0!	0	0	0	0	2.17515	2
3560	MYO_640	CP003272 (pCC5.2_M)	4578..4859	282	hypothetical protein		AGF53827.1	#DIV/0!	#DIV/0!	0	0	1.91463	1	0	0
3561	MYO_650	CP003272 (pCC5.2_M)	4861..5136	276	hypothetical protein		AGF53828.1	#DIV/0!	#DIV/0!	0	0	0	0	0	0
3204	MYO_2450	CP003266 (pSYSM_M)	complement(42442..43083)	642	hypothetical protein	similar to sll5044	AGF53471.1	0.0634142	32.8059	53.0484	53	3.36403	4	1740.3	2902
3205	MYO_2460	CP003266 (pSYSM_M)	complement(43110..43292)	183	hypothetical protein	similar to ssl5045	AGF53472.1	0.114578	30.2567	77.2509	22	8.85125	3	2337.36	1111
3213	MYO_2540	CP003266 (pSYSM_M)	52552..52992	441	hypothetical protein	similar to slr5053	AGF53480.1	0.28008	25.883	43.7134	30	12.2432	10	1131.43	1296
3206	MYO_2470	CP003266 (pSYSM_M)	complement(43343..44293)	951	hypothetical protein	similar to sll5046	AGF53473.1	0.107223	25.1126	291.225	431	31.226	55	7313.41	18065
3215	MYO_2560	CP003266 (pSYSM_M)	54119..54910	792	hypothetical protein	similar to slr5055	AGF53482.1	0.029955	24.6888	455.166	561	13.6345	20	11237.5	23117
3217	MYO_2580	CP003266 (pSYSM_M)	complement(56854..57807)	954	hypothetical protein	similar to sll5057	AGF53484.1	0.0230654	22.5035	515.282	765	11.8852	21	11595.7	28733
3216	MYO_2570	CP003266 (pSYSM_M)	54911..56281	1371	hypothetical protein	similar to slr5056	AGF53483.1	0.134569	20.2351	119.987	256	16.1466	41	2427.95	8646
3202	MYO_2430	CP003266 (pSYSM_M)	complement(40411..41253)	843	hypothetical protein	similar to sll5042	AGF53469.1	0.650507	14.9013	47.2602	62	30.7431	48	704.238	1542
3203	MYO_2440	CP003266 (pSYSM_M)	complement(41411..42397)	987	hypothetical protein	similar to sll5043	AGF53470.1	0.305541	14.8152	42.9693	66	13.1289	24	636.599	1632
3559	MYO_630	CP003272 (pCC5.2_M)	1600..4515	2916	hypothetical protein		AGF53826.1	0.840239	10.1854	0.220366	1	0.18516	1	2.24452	17
466	MYO_14730	CP003265	complement(516190..516999)	810	regulatory protein for beta-lactamase	similar to sll1005	AGF50733.1	7.56215	8.38801	0.793317	1	5.99918	9	6.65435	14
1759	MYO_117810	CP003265	complement(1932323..1932529)	207	hypothetical protein	similar to ssl2138	AGF52026.1	3.36095	6.59058	3.10428	1	10.4334	4	20.459	11
3500	MYO_3590	CP003269 (pSYSX_M)	55646..56236	591	hypothetical protein	similar to slr6058	AGF53767.1	2.52072	6.59058	1.08729	1	2.74074	3	7.16585	11
3234	MYO_2750	CP003266 (pSYSM_M)	73270..73485	216	hypothetical protein	similar to ssr5074	AGF53501.1	5.88167	5.39229	2.97494	1	17.4976	7	16.0417	9
3214	MYO_2550	CP003266 (pSYSM_M)	53037..54026	990	hypothetical protein	similar to slr5054	AGF53481.1	0.675486	5.01636	33.103	51	22.3606	41	166.056	427
229	MYO_12310	CP003265	complement(255823..256305)	483	hypothetical protein	similar to sll1671	AGF50496.1	2.52072	4.79315	1.33041	1	3.35358	3	6.37684	8
2359	MYO_123950	CP003265	complement(2631928..2632485)	558	hypothetical protein(sigma 70?)	similar to sll0687	AGF52626.1	0.840239	4.79315	1.15159	1	0.96761	1	5.51974	8
3201	MYO_2420	CP003266 (pSYSM_M)	complement(39660..40208)	549	transposase	similar to sll5041	AGF53468.1	1.82052	4.09415	14.0456	12	25.5703	26	57.5048	82
1714	MYO_117360	CP003265	1883605..1884615	1011	hypothetical protein	similar to slr1287	AGF51981.1	3.92111	3.79458	1.90679	3	7.47672	14	7.23544	19
3314	MYO_4250	CP003267 (pSYSA_M)	complement(22526..23110)	585	hypothetical protein	similar to sll7027	AGF53581.1	4.20119	3.59486	1.09844	1	4.61475	5	3.94874	6
3260	MYO_21010	CP003266 (pSYSM_M)	complement(95697..95903)	207	hypothetical protein	similar to ssl5100	AGF53527.1	2.52072	3.59486	3.10428	1	7.82502	3	11.1595	6
1386	MYO_114010	CP003265	complement(1534123..1534392)	270	50S ribosomal protein L12-like protein	similar to ssl0438	AGF51653.1	1.68048	3.59486	4.7599	2	7.99891	4	17.1112	12
3440	MYO_5480	CP003268 (pSYSG_M)	41994..42194	201	hypothetical protein	similar to ssr8047	AGF53707.1	1.68048	3.59486	3.19695	1	5.3724	2	11.4926	6
2451	MYO_124880	CP003265	complement(2735980..2736183)	204	hypothetical protein	similar to ssl0350	AGF52718.1	2.85681	3.47503	15.7497	5	44.9938	17	54.7306	29
3551	MYO_31100	CP003269 (pSYSX_M)	complement(103764..104327)	564	hypothetical protein	similar to sll6109	AGF53818.1	2.18462	3.47503	5.69669	4	12.4451	10	19.7962	23
520	MYO_15270	CP003265	572238..572411	174	transposase	similar to ssr3452	AGF50787.1	2.94083	3.29529	7.38606	2	21.7212	7	24.3392	11
1133	MYO_111460	CP003265	complement(1254595..1255221)	627	hypothetical protein	similar to sll2011	AGF51400.1	1.68048	3.1455	4.09944	4	6.88901	8	12.8948	21
1576	MYO_115950	CP003265	complement(1727481..1728497)	1017	transposase	similar to sll1255	AGF51843.1	0.980278	3.09557	3.79107	2	3.71631	3	11.7355	11
1458	MYO_114740	CP003265	complement(1615845..1616282)	438	hypothetical protein	similar to sll1411	AGF51725.1	1.68048	2.99572	1.46709	1	2.46542	2	4.395	5
3171	MYO_2120	CP003266 (pSYSM_M)	17218..17439	222	hypothetical protein	similar to ssr5011	AGF53438.1	5.04143	2.99572	2.89454	1	14.5926	6	8.67121	5
2221	MYO_122540	CP003265	complement(2480010..2480795)	786	transposase	similar to sll0012	AGF52488.1	3.02486	2.99572	4.0877	0	12.3647	2	12.2456	1
813	MYO_18220	CP003265	892916..893245	330	hypothetical protein	similar to slr1209	AGF51080.1	2.01657	2.99572	9.73616	5	19.6337	12	29.1668	25
3536	MYO_3950	CP003269 (pSYSX_M)	88094..88417	324	hypothetical protein	similar to slr6094	AGF53803.1	1.68048	2.99572	1.98329	1	3.33288	2	5.94138	5
3338	MYO_4490	CP003267 (pSYSA_M)	complement(41352..41618)	267	hypothetical protein	similar to ssl7051	AGF53605.1	1.68048	2.99572	4.81338	2	8.08878	4	14.4195	10
2655	MYO_126930	CP003265	2965437..2966456	1020	transposase	similar to slr0099	AGF52922.1	1.26036	2.99572	1.25997	2	1.58802	3	3.77453	8
2190	MYO_122190	CP003265	2441266..2442114	849	transposase	similar to slr0352	AGF52457.1	0	2.99572	0.756875	1	0	0	2.26738	2
1583	MYO_116020	CP003265	complement(1737599..1738489)	891	hypothetical protein	similar to sll1251	AGF51850.1	3.46598	2.99572	5.76958	8	19.9973	33	17.284	40
3114	MYO_131620	CP003265	3522188..3522682	495	hypothetical protein (Rhodanase?)	similar to slr1184	AGF53381.1	0.840239	2.99572	1.29816	1	1.09076	1	3.88891	5
2165	ycf33	CP003265	complement(2414534..2414734)	201	Ycf33	similar to ssl1417	AGF52432.1	1.68048	2.84593	25.5756	8	42.9792	16	72.7864	38
2604	MYO_126420	CP003265	2911402..2911974	573	hypothetical protein	similar to slr0505	AGF52871.1	1.4004	2.796	6.72866	6	9.4228	10	18.8133	28
3207	MYO_2480	CP003266 (pSYSM_M)	complement(44338..45855)	1518	hypothetical protein	similar to sll5047	AGF53474.1	0.860244	2.76747	17.7791	42	15.2944	43	49.2031	194
2380	MYO_124170	CP003265	2655118..2655900	783	hypothetical protein	similar to slr0636	AGF52647.1	1.26036	2.69615	1.64135	2	2.06868	3	4.42531	9
2757	merR_3	CP003265	3088512..3088925	414	mercuric resistance operon regulatory protein	similar to slr0701	AGF53024.1	4.62131	2.69615	3.10428	2	14.3459	11	8.3696	9
169	MYO_11700	CP003265	complement(183935..184924)	990	hypothetical protein	similar to sll1319	AGF50436.1	2.1006	2.69615	1.29816	2	2.7269	5	3.50002	9
497	MYO_15040	CP003265	complement(551722..552369)	648	Thy1-like protein	similar to sll1635	AGF50764.1	1.32037	2.65335	6.94152	7	9.16541	11	18.4183	31
1447	MYO_114630	CP003265	1604830..1605114	285	hypothetical protein	similar to ssr2551	AGF51714.1	0.840239	2.59629	6.76407	3	5.68343	3	17.5615	13
2470	MYO_125070	CP003265	2760438..2761001	564	hypothetical protein	similar to slr0895	AGF52737.1	1.8672	2.52972	10.254	9	19.1463	20	25.9398	38
708	MYO_17170	CP003265	785320..787467	2148	hypothetical protein	similar to slr1135	AGF50975.1	3.12089	2.48217	2.09409	7	6.53542	26	5.19788	29
2722	MYO_127610	CP003265	complement(3047531..3048235)	705	OmpR subfamily	similar to sll0797	AGF52989.1	3.78107	2.39657	1.82294	2	6.89267	9	4.36881	8
2828	cmpB	CP003265	3167743..3168585	843	bicarbonate transport system permease protein	similar to slr0041	AGF53095.1	3.36095	2.39657	0.762262	1	2.56193	4	1.82682	4
470	MYO_14770	CP003265	complement(521020..521271)	252	transposase	similar to ssl1922	AGF50737.1	2.52072	2.39657	2.54995	1	6.42769	3	6.11114	4
673	MYO_16820	CP003265	746735..747079	345	hypothetical protein	similar to slr2006	AGF50940.1	1.96056	2.39657	5.58771	3	10.955	7	13.3914	12
2738	MYO_127770	CP003265	complement(3064920..3065888)	969	hypothetical protein	similar to sll0787	AGF53005.1	1.68048	2.39657	0.663144	1	1.1144	2	1.58927	4
2518	MYO_125560	CP003265	2813785..2814228	444	hypothetical protein	similar to slr0573	AGF52785.1	1.68048	2.39657	5.78907	4	9.7284	8	13.8739	16
3342	MYO_4530	CP003267 (pSYSA_M)	complement(43313..43855)	543	hypothetical protein	similar to sll7055	AGF53609.1	1.4004	2.39657	3.5502	3	4.9717	5	8.50833	12
3252	MYO_2930	CP003266 (pSYSM_M)	90973..91218	246	hypothetical protein	similar to ssr5092	AGF53519.1	0.840239	2.39657	2.61214	1	2.19482	1	6.26019	4
2250	MYO_122850	CP003265	2521134..2521829	696	hypothetical protein	similar to slr0224	AGF52517.1	0.840239	2.39657	3.69303	4	3.10302	4	8.85061	16
3309	MYO_4200	CP003267 (pSYSA_M)	complement(17409..17597)	189	hypothetical protein	similar to ssl7022	AGF53576.1	0.840239	2.39657	3.39993	0	2.85675	1	8.14818	3
2611	MYO_126490	CP003265	2918714..2918872	159	transposase	similar to ssr0871	AGF52878.1	0	2.39657	4.04143	0	0	0	9.68558	4
1244	MYO_112580	CP003265	complement(1377132..1378181)	1050	hypothetical protein	similar to sll1164	AGF51511.1	2.1006	2.39657	2.44795	4	5.14215	10	5.86669	16
2352	MYO_123880	CP003265	2626051..2626380	330	hypothetical protein	similar to slr0496	AGF52619.1	1.96056	2.39657	5.8417	3	11.453	7	14.0001	12
1892	MYO_119150	CP003265	complement(2080132..2081184)	1053	hypothetical protein	similar to sll0428	AGF52159.1	2.38068	2.29672	3.66146	6	8.71676	17	8.40934	23
1057	MYO_110700	CP003265	complement(1179581..1180327)	747	hypothetical protein	similar to sll1308	AGF51324.1	2.1006	2.27675	8.60223	10	18.0698	25	19.5851	38
3370	MYO_4810	CP003267 (pSYSA_M)	76084..77217	1134	hypothetical protein	similar to slr7083	AGF53637.1	1.68048	2.27675	2.83328	5	4.76125	10	6.45065	19
1111	MYO_111240	CP003265	complement(1232979..1233593)	615	hypothetical protein	similar to sll1761	AGF51378.1	1.68048	2.24679	4.17943	4	7.02343	8	9.39029	15
591	MYO_16000	CP003265	660274..660627	354	hypothetical protein	similar to slr1032	AGF50858.1	3.78107	2.24679	7.26087	4	27.4539	18	16.3136	15
596	MYO_16050	CP003265	complement(663896..664282)	387	transposase	similar to sll0986	AGF50863.1	2.38068	2.19686	9.96259	5	23.7177	16	21.8864	20
1946	MYO_119710	CP003265	complement(2141695..2142165)	471	hypothetical protein	similar to sll0361	AGF52213.1	1.78551	2.1719	10.9144	8	19.4878	17	23.705	29
2187	MYO_122160	CP003265	2438365..2439150	786	transposase	similar to slr0350	AGF52454.1	0.945268	2.1719	6.54032	0	6.18236	1	14.2049	2
3210	MYO_2510	CP003266 (pSYSM_M)	complement(48291..49616)	1326	hypothetical protein	similar to sll5050	AGF53477.1	1.08467	2.16781	26.6533	55	28.9101	71	57.7793	199
17	pchR_1	CP003265	complement(20615..21595)	981	regulatory protein PchR	similar to sll1205	AGF50284.1	1.42841	2.15692	6.55032	10	9.35652	17	14.1285	36
468	MYO_14750	CP003265	complement(518389..520374)	1986	sensory transduction histidine kinase	similar to sll1003	AGF50735.1	2.52072	2.14693	3.8827	12	9.78718	36	8.33589	43
60	MYO_1600	CP003265	complement(70420..70935)	516	hypothetical protein	similar to sll1061	AGF50327.1	2.05392	2.13029	11.2079	9	23.0201	22	23.8761	32
2414	MYO_124510	CP003265	2693817..2694104	288	hypothetical protein	similar to ssr0693	AGF52681.1	2.07259	2.11697	33.4681	15	69.3655	37	70.851	53
2888	amt3	CP003265	complement(3238358..3239983)	1626	ammonium/methylammonium permease	similar to sll0537	AGF53155.1	2.52072	2.097	1.58078	4	3.9847	12	3.3149	14
3169	MYO_2100	CP003266 (pSYSM_M)	15996..16235	240	hypothetical protein	similar to ssr5009	AGF53436.1	2.13879	2.06977	29.4519	11	62.9914	28	60.9586	38
936	MYO_19470	CP003265	1035248..1036744	1497	hypothetical protein	similar to slr1229	AGF51203.1	1.49376	2.06372	3.86325	9	5.77075	16	7.97265	31
2781	MYO_128200	CP003265	3111142..3111555	414	hypothetical protein	similar to slr0711	AGF53048.1	1.68048	2.05793	35.6993	23	59.9918	46	73.4665	79
2586	crtO	CP003265	2892214..2893842	1629	b-carotene ketolase	similar to slr0088	AGF52853.1	1.74049	2.05421	5.52254	14	9.61195	29	11.3444	48
888	MYO_18980	CP003265	979340..979825	486	hypothetical protein	similar to slr1542	AGF51155.1	2.28065	2.05421	18.5107	14	42.2165	38	38.0249	48
2827	cmpA	CP003265	3166322..3167680	1359	bicarbonate transporter	similar to slr0040	AGF53094.1	1.58353	2.05091	12.2938	26	19.4675	49	25.2135	89
909	MYO_19200	CP003265	complement(1001294..1001761)	468	hypothetical protein	similar to sll1455	AGF51176.1	2.85681	2.03709	6.86524	5	19.6127	17	13.9851	17
3126	purK	CP003265	complement(3532555..3533721)	1167	phosphoribosyl aminoimidazole carboxylase	similar to sll0578	AGF53393.1	1.35372	2.01934	29.7341	54	40.2516	87	60.0431	182
2029	MYO_120560	CP003265	2242674..2242850	177	hypothetical protein	similar to ssr3304	AGF52296.1	1.86053	2.01141	50.8261	14	94.5633	31	102.232	47
3208	MYO_2490	CP003266 (pSYSM_M)	complement(45852..46940)	1089	hypothetical protein	similar to sll5048	AGF53475.1	0.972177	1.97074	71.3985	121	69.412	140	140.708	398
3069	MYO_131170	CP003265	3469325..3469576	252	hypothetical protein	similar to ssr2781	AGF53336.1	1.80051	1.96861	17.8496	7	32.1385	15	35.139	23
416	MYO_14230	CP003265	complement(458510..458959)	450	hypothetical protein	similar to sll1515	AGF50683.1	0.579297	1.96317	3030.15	2122	1755.36	1463	5948.7	6953
2680	MYO_127190	CP003265	complement(2995507..2996193)	687	transposase	similar to sll0092	AGF52947.1	1.68048	1.94722	3.74141	3	6.28735	8	7.28533	11
1659	MYO_116790	CP003265	complement(1823422..1823937)	516	hypothetical protein	similar to sll1386	AGF51926.1	1.68048	1.94722	9.96259	8	16.7419	16	19.3993	26
1520	MYO_115370	CP003265	1677986..1678273	288	transposase	similar to ssr2227	AGF51787.1	1.12032	1.94722	26.7744	12	29.9959	16	52.1356	39
679	MYO_16880	CP003265	751172..751468	297	hypothetical protein	similar to ssr3410	AGF50946.1	2.94083	1.94722	8.65437	4	25.4511	14	16.8519	13
1286	MYO_113010	CP003265	1415313..1415717	405	ferredoxin	similar to slr2059	AGF51553.1	1.47042	1.94722	6.34654	4	9.33206	7	12.3581	13
18	MYO_1180	CP003265	complement(21838..23121)	1284	hypothetical protein	similar to sll1204	AGF50285.1	1.26036	1.94722	2.00183	4	2.52302	6	3.89799	13
1059	MYO_110720	CP003265	1181371..1182240	870	hypothetical protein	similar to slr1407	AGF51326.1	2.26218	1.93569	9.60187	13	21.7212	35	18.5863	42
2285	MYO_123200	CP003265	complement(2555691..2555885)	195	transposase	similar to ssl0769	AGF52552.1	1.84852	1.91726	16.4766	5	30.4574	11	31.5899	16
1288	MYO_113030	CP003265	complement(1417465..1418043)	579	hypothetical protein	similar to sll1956	AGF51555.1	2.1006	1.89729	6.65893	6	13.9877	15	12.6339	19
3125	MYO_131730	CP003265	3532181..3532513	333	hypothetical protein	similar to slr0587	AGF53392.1	1.69604	1.88619	104.203	54	176.733	109	196.547	170
3209	MYO_2500	CP003266 (pSYSM_M)	complement(46945..48288)	1344	hypothetical protein	similar to sll5049	AGF53476.1	1.12032	1.87318	41.596	87	46.6008	116	77.917	272
3421	MYO_5290	CP003268 (pSYSG_M)	complement(23856..24077)	222	hypothetical protein	similar to ssl8028	AGF53688.1	0.933598	1.864	26.0508	9	24.321	10	48.5588	28
2968	nadA	CP003265	complement(3343129..3344085)	957	quinolinate synthetase	similar to sll0622	AGF53235.1	0.933598	1.85376	78.5608	117	73.3442	130	145.633	362
2717	MYO_127560	CP003265	3042101..3043120	1020	hypothetical protein	similar to slr0787	AGF52984.1	0.891162	1.8519	20.7896	33	18.5269	35	38.5002	102
3479	MYO_3380	CP003269 (pSYSX_M)	33889..34311	423	arsenate reductase	similar to slr6037	AGF53746.1	2.04058	1.84023	21.2676	4	43.3983	16	39.1373	19
3357	MYO_4680	CP003267 (pSYSA_M)	complement(61917..62291)	375	hypothetical protein	similar to sll7070	AGF53624.1	1.14578	1.83374	56.5476	33	64.7911	45	103.694	101
3486	MYO_3450	CP003269 (pSYSX_M)	42326..42805	480	hypothetical protein	similar to slr6044	AGF53753.1	1.68048	1.79743	5.35489	4	8.99877	8	9.62504	12
3463	MYO_3220	CP003269 (pSYSX_M)	22487..22951	465	hypothetical protein	similar to slr6021	AGF53730.1	1.68048	1.79743	2.76381	0	4.64453	0	4.96776	0
3074	MYO_131220	CP003265	3473642..3473845	204	hypothetical protein	similar to ssr2786	AGF53341.1	1.45132	1.79743	207.896	66	301.723	114	373.678	198
3512	MYO_3710	CP003269 (pSYSX_M)	65086..65613	528	hypothetical protein	similar to slr6070	AGF53779.1	5.04143	1.79743	1.21702	0	6.13552	0	2.18751	0
3523	MYO_3820	CP003269 (pSYSX_M)	77766..78551	786	hypothetical protein	similar to slr6081	AGF53790.1	3.78107	1.79743	3.27016	0	12.3647	0	5.87789	0
1218	MYO_112320	CP003265	1344667..1345026	360	transposase	similar to slr0856	AGF51485.1	3.36095	1.79743	1.78496	1	5.99918	4	3.20835	1
2691	MYO_127300	CP003265	3008108..3008692	585	hypothetical protein	similar to slr0300	AGF52958.1	3.36095	1.79743	7.68907	7	25.8426	28	13.8206	21
2778	MYO_128170	CP003265	complement(3108178..3109098)	921	hypothetical protein	similar to sll0664	AGF53045.1	2.52072	1.79743	1.39541	2	3.51743	6	2.50815	6
1468	MYO_114850	CP003265	1623760..1624101	342	hypothetical protein	similar to slr2110	AGF51735.1	2.52072	1.79743	7.51564	4	18.9448	12	13.5088	12
3200	MYO_2410	CP003266 (pSYSM_M)	38994..39641	648	transposase	similar to slr5040	AGF53467.1	1.93255	1.79743	9.91646	4	19.164	13	17.8242	17
963	pmbA	CP003265	1058192..1059475	1284	PmbA protein	similar to slr1435	AGF51230.1	1.82875	1.79743	8.50777	17	15.5586	37	15.2921	51
2204	MYO_122370	CP003265	complement(2459479..2460822)	1344	hypothetical protein	similar to sll0023	AGF52471.1	1.7505	1.79743	11.4748	24	20.0865	50	20.6251	72
1640	ho2	CP003265	complement(1802872..1803624)	753	heme oxygenase	similar to sll1875	AGF51907.1	1.68048	1.79743	3.41348	4	5.73627	8	6.13549	12
3476	MYO_3350	CP003269 (pSYSX_M)	32129..32545	417	cytidine deaminase	similar to slr6034	AGF53743.1	1.68048	1.79743	7.70488	3	12.9479	9	13.849	9
3039	MYO_130870	CP003265	3425053..3425262	210	hypothetical protein	similar to ssr1258	AGF53306.1	1.68048	1.79743	12.2397	4	20.5686	8	22.0001	12
3176	MYO_2170	CP003266 (pSYSM_M)	21843..23219	1377	hypothetical protein	similar to slr5016	AGF53443.1	1.68048	1.79743	4.19991	9	7.05786	18	7.54905	27
90	ksgA	CP003265	complement(107471..108325)	855	dimethyladenosine transferase	similar to sll0708	AGF50357.1	1.32037	1.79743	5.26094	7	6.94642	11	9.45618	21
410	MYO_14170	CP003265	449268..450143	876	hypothetical protein	similar to slr1592	AGF50677.1	0.840239	1.79743	2.20064	3	1.84906	3	3.9555	9
1245	MYO_112590	CP003265	complement(1378185..1378592)	408	hypothetical protein	similar to sll1163	AGF51512.1	0.840239	1.79743	1.57497	1	1.32335	1	2.83089	3
3019	MYO_130670	CP003265	3402082..3402402	321	transposase	similar to slr1586	AGF53286.1	0	1.79743	2.00183	1	0	0	3.59815	3
3469	MYO_3280	CP003269 (pSYSX_M)	25538..25729	192	hypothetical protein	similar to ssr6027	AGF53736.1	0	1.79743	3.34681	0	0	0	6.01565	0
1555	MYO_115730	CP003265	complement(1709283..1709483)	201	transposase	similar to ssl1507	AGF51822.1	1.89054	1.79743	12.7878	4	24.1758	9	22.9852	12
2708	MYO_127470	CP003265	3033502..3034332	831	bromoperoxidase	similar to slr0314	AGF52975.1	1.89054	1.79743	3.09308	4	5.84758	9	5.55959	12
1403	MYO_114190	CP003265	complement(1553530..1554243)	714	transposase	similar to sll1982	AGF51670.1	1.17633	1.79743	4.49991	5	5.29339	6	8.08827	12
3343	MYO_4540	CP003267 (pSYSA_M)	complement(44267..44644)	378	hypothetical protein	similar to sll7056	AGF53610.1	0.420119	1.79743	3.39993	2	1.42838	1	6.11114	6
2411	MYO_124480	CP003265	complement(2691529..2692413)	885	hypothetical protein	similar to sll0381	AGF52678.1	1.58797	1.79331	316.574	436	502.711	824	567.714	1305
146	ycf6	CP003265	complement(160004..160093)	90	cytochrome b6-f complex subunit VIII	similar to sml0004	AGF50413.1	1.72049	1.7689	149.937	21	257.965	43	265.223	62
2623	MYO_126610	CP003265	2929479..2929781	303	hypothetical protein	similar to slr0519	AGF52890.1	1.85737	1.7659	40.2942	19	74.8413	42	71.1554	56
3212	MYO_2530	CP003266 (pSYSM_M)	complement(50111..52333)	2223	hypothetical protein	similar to sll5052	AGF53479.1	1.31077	1.76148	28.9063	100	37.8896	156	50.9179	294
3072	MYO_131200	CP003265	3472150..3472686	537	hypothetical protein	similar to slr1667	AGF53339.1	1.4859	1.75902	2743.86	2293	4077.1	4055	4826.5	6732
720	speB	CP003265	complement(799689..800861)	1173	agmatine ureohydrolase	similar to sll1077	AGF50987.1	1.27171	1.74885	20.2691	37	25.7765	56	35.4477	108
1850	MYO_118720	CP003265	2031070..2031360	291	hypothetical protein	similar to ssr2723	AGF52117.1	1.83452	1.7475	132.492	60	243.06	131	231.53	175
1937	MYO_119620	CP003265	complement(2130817..2131290)	474	hypothetical protein	similar to sll0257	AGF52204.1	1.68048	1.74296	14.9124	11	25.0599	22	25.9917	32
1252	MYO_112660	CP003265	1383294..1383554	261	transposase	similar to ssr2078	AGF51519.1	1.42841	1.73752	24.6202	9	35.1676	16	42.778	28
1219	MYO_112330	CP003265	1345020..1345514	495	transposase	similar to slr0857	AGF51486.1	1.00829	1.73752	12.9816	6	13.0891	11	22.5557	21
2078	ycf37	CP003265	2300774..2301301	528	Ycf37	similar to slr0171	AGF52345.1	1.33576	1.73598	47.4638	39	63.4004	62	82.3962	113
3197	MYO_2380	CP003266 (pSYSM_M)	36483..36866	384	hypothetical protein	similar to slr5037	AGF53464.1	0.691961	1.72694	28.4479	17	19.6848	14	49.1278	49
1832	MYO_118540	CP003265	complement(2013377..2015287)	1911	ABC transporter	similar to sll0912	AGF52099.1	1.61326	1.72553	8.40642	25	13.5617	48	14.5056	72
1911	MYO_119360	CP003265	complement(2099245..2099835)	591	hypothetical protein	similar to sll0274	AGF52178.1	1.70594	1.72481	35.8805	33	61.2099	67	61.8869	95
384	MYO_13900	CP003265	419065..420366	1302	hypothetical protein	similar to slr0681	AGF50651.1	1.43654	1.71529	61.1987	121	87.9142	209	104.974	351
3253	MYO_2940	CP003266 (pSYSM_M)	91316..92692	1377	hypothetical protein	similar to slr5093	AGF53520.1	1.56044	1.71184	3.2666	7	5.09734	13	5.59189	20
3244	MYO_2850	CP003266 (pSYSM_M)	complement(84439..85155)	717	hypothetical protein	similar to sll5084	AGF53511.1	1.68048	1.71184	6.27351	7	10.5425	14	10.7392	20
1605	MYO_116240	CP003265	complement(1760923..1761348)	426	hypothetical protein	similar to sll1897	AGF51872.1	1.35731	1.70525	19.6095	13	26.6161	21	33.4391	37
2409	cbiM	CP003265	complement(2690348..2690992)	645	CbiM protein	similar to sll0383	AGF52676.1	1.77818	1.6999	42.8391	43	76.1756	91	72.822	122
1249	MYO_112630	CP003265	complement(1381073..1381729)	657	hypothetical protein	similar to sll1159	AGF51516.1	2.38068	1.69757	5.86837	6	13.9707	17	9.96199	17
1128	pta	CP003265	1248912..1251005	2094	phosphotransacetylase	similar to slr2132	AGF51395.1	1.78551	1.69757	7.36489	24	13.1501	51	12.5024	68
225	MYO_12270	CP003265	249062..250117	1056	hypothetical protein	similar to slr1788	AGF50492.1	1.37706	1.69757	21.9064	36	30.1663	59	37.1877	102
939	MYO_19500	CP003265	1038851..1039387	537	hypothetical protein	similar to slr1232	AGF51206.1	1.73842	1.69413	34.7021	29	60.3269	60	58.7898	82
2238	MYO_122730	CP003265	complement(2504649..2505629)	981	hypothetical protein	similar to sll0210	AGF52505.1	1.53435	1.69323	15.0657	23	23.1161	42	25.5098	65
2450	MYO_124870	CP003265	complement(2735197..2735820)	624	hypothetical protein	similar to sll0181	AGF52717.1	2.1006	1.6776	10.2979	10	21.6317	25	17.2757	28
1212	MYO_112260	CP003265	complement(1339601..1340194)	594	hypothetical protein	similar to sll0858	AGF51479.1	1.49185	1.67516	53.008	49	79.0801	87	88.7967	137
1967	MYO_119930	CP003265	2175168..2175578	411	hypothetical protein	similar to slr0145	AGF52234.1	1.27652	1.67453	243.902	156	311.344	237	408.42	436
3136	MYO_131840	CP003265	complement(3541211..3542623)	1413	hypothetical protein	similar to sll0572	AGF53403.1	1.35522	1.66697	56.3912	124	76.4227	200	94.0025	345
121	MYO_11210	CP003265	140585..141007	423	hypothetical protein	similar to slr0238	AGF50388.1	1.28036	1.65478	31.9015	21	40.8455	32	52.7898	58
207	MYO_12090	CP003265	228866..230566	1701	high affinity sulfate transporter	similar to slr1776	AGF50474.1	1.47882	1.65364	9.44425	25	13.9663	44	15.6174	69
2870	MYO_129110	CP003265	complement(3222897..3223583)	687	hypothetical protein	similar to sll0493	AGF53137.1	2.41569	1.64764	7.48282	8	18.0761	23	12.329	22
2358	MYO_123940	CP003265	complement(2631120..2631923)	804	hypothetical protein	similar to sll0688	AGF52625.1	1.47042	1.64764	3.19695	4	4.70085	7	5.26744	11
206	MYO_12080	CP003265	227943..228812	870	hypothetical protein	similar to slr1774	AGF50473.1	1.36539	1.64764	5.90884	8	8.06786	13	9.73568	22
2282	MYO_123170	CP003265	2552861..2553184	324	hypothetical protein	similar to slr0438	AGF52549.1	1.09231	1.64764	39.6659	20	43.3274	26	65.3552	55
1749	rpiB	CP003265	complement(1921260..1921556)	297	ribose phosphate isomerase B	similar to ssl2153	AGF52016.1	0.630179	1.64764	8.65437	4	5.4538	3	14.2593	11
3135	arcC	CP003265	complement(3540298..3541224)	927	carbamate kinase	similar to sll0573	AGF53402.1	1.32184	1.64399	56.8416	82	75.1354	129	93.447	225
2095	MYO_121230	CP003265	2323131..2324204	1074	hypothetical protein	similar to slr0179	AGF52362.1	1.12032	1.64051	25.1291	42	28.1526	56	41.2246	115
2700	MYO_127390	CP003265	complement(3021776..3023014)	1239	hypothetical protein	similar to sll0283	AGF52967.1	1.23235	1.63766	7.7795	15	9.58707	22	12.7402	41
370	MYO_13760	CP003265	397139..398245	1107	GTP-binding protein	similar to slr1090	AGF50637.1	1.41313	1.63403	12.7705	22	18.0463	37	20.8673	60
3272	MYO_21130	CP003266 (pSYSM_M)	104141..105274	1134	hypothetical protein	similar to slr5112	AGF53539.1	1.84386	1.631	20.3996	36	37.6139	79	33.2718	98
1353	kdpD	CP003265	1496579..1497691	1113	potassium-transporting ATPase D chain	similar to slr1731	AGF51620.1	0.900256	1.62625	8.08285	14	7.27663	15	13.1447	38
2791	MYO_128300	CP003265	complement(3118952..3119221)	270	hypothetical protein	similar to ssl1255	AGF53058.1	0.790813	1.62121	40.4592	17	31.9956	16	65.5929	46
2662	MYO_127000	CP003265	2975776..2977164	1389	hypothetical protein	similar to slr0105	AGF52929.1	1.42766	1.61716	52.2767	113	74.6334	192	84.5396	305
1423	MYO_114390	CP003265	complement(1578093..1579007)	915	hypothetical protein	similar to sll1429	AGF51690.1	1.89054	1.6102	11.2365	16	21.243	36	18.093	43
1538	MYO_115550	CP003265	complement(1693186..1693980)	795	hypothetical protein	similar to sll0815	AGF51805.1	1.57545	1.60271	32.3314	40	50.9364	75	51.8178	107
2539	MYO_125770	CP003265	complement(2836192..2836647)	456	hypothetical protein	similar to sll0832	AGF52806.1	3.36095	1.59772	4.22754	3	14.2086	12	6.75442	8
716	MYO_17250	CP003265	complement(796444..797286)	843	integral membrane components of other binding-protein-dependent transport system	similar to sll1081	AGF50983.1	1.12032	1.59772	2.28679	3	2.56193	4	3.65363	8
875	MYO_18850	CP003265	complement(965593..967128)	1536	hypothetical protein	similar to sll1717	AGF51142.1	1.08031	1.59772	8.78537	21	9.49089	27	14.0365	56
465	MYO_14720	CP003265	complement(514949..516046)	1098	hypothetical protein	similar to sll1006	AGF50732.1	0.960273	1.59772	12.2899	21	11.8017	24	19.6358	56
485	MYO_14920	CP003265	complement(541607..542098)	492	hypothetical protein	similar to sll1642	AGF50752.1	0.840239	1.59772	3.91821	3	3.29223	3	6.26019	8
1644	MYO_116630	CP003265	complement(1807391..1809415)	2025	sensory transduction histidine kinase	similar to sll1871	AGF51911.1	2.35267	1.58773	6.34654	20	14.9313	56	10.0766	53
2795	MYO_128340	CP003265	complement(3123579..3124610)	1032	hypothetical protein	similar to sll0744	AGF53062.1	1.68048	1.58773	12.4532	20	20.9274	40	19.7724	53
76	cpcF	CP003265	complement(88017..88661)	645	phycocyanin alpha phycocyanobilin lyase CpcF	similar to sll1051	AGF50343.1	1.20034	1.58345	13.9476	14	16.7419	20	22.0854	37
2745	MYO_127840	CP003265	complement(3072378..3072845)	468	hypothetical protein	similar to sll0781	AGF53012.1	1.17633	1.58174	34.3262	25	40.3791	35	54.2951	66
3023	ggtA	CP003265	3406852..3407943	1092	ATP-binding subunit of an ABC-type osmolyte transporter	similar to slr0747	AGF53290.1	1.22217	1.57956	6.47294	11	7.91101	16	10.2244	29
1061	MYO_110740	CP003265	1183315..1184319	1005	beta transducin-like protein	similar to slr1410	AGF51328.1	2.44433	1.57956	7.03329	11	17.1917	32	11.1095	29
2754	MYO_127930	CP003265	3085687..3086151	465	hypothetical protein	similar to slr0698	AGF53021.1	1.89054	1.57275	11.0553	8	20.9004	18	17.3872	21
1079	MYO_110920	CP003265	1199964..1201484	1521	hypothetical protein	similar to slr1863	AGF51346.1	0.945268	1.57275	3.37981	8	3.19483	9	5.31561	21
2425	MYO_124620	CP003265	complement(2707779..2708375)	597	hypothetical protein	similar to sll0372	AGF52692.1	1.09877	1.56699	55.9707	52	61.4991	68	87.7056	136
734	acp	CP003265	complement(821205..821438)	234	acyl carrier protein	similar to ssl2084	AGF51001.1	1.38577	1.56493	367.977	134	509.93	221	575.857	350
383	MYO_13890	CP003265	418806..419228	423	hypothetical protein	similar to slr0680	AGF50650.1	1.21368	1.56443	191.409	116	232.309	176	299.446	323
886	MYO_18960	CP003265	977587..978522	936	hypothetical protein	similar to slr1540	AGF51153.1	1.43374	1.55968	86.5021	126	124.022	215	134.915	328
2410	MYO_124470	CP003265	complement(2690993..2691523)	531	hypothetical protein	similar to sll0382	AGF52677.1	1.46424	1.55954	164.58	136	240.984	237	256.668	354
3199	MYO_2400	CP003266 (pSYSM_M)	complement(38437..38730)	294	hypothetical protein	similar to ssl5039	AGF53466.1	1.34438	1.55777	21.8567	10	29.3837	16	34.0478	26
2557	MYO_125950	CP003265	2857768..2858340	573	hypothetical protein	similar to slr0845	AGF52824.1	2.18462	1.55777	28.0361	25	61.2482	65	43.6738	65
3545	MYO_31040	CP003269 (pSYSX_M)	97886..98596	711	hypothetical protein	similar to slr6103	AGF53812.1	1.84852	1.55777	4.51889	5	8.35329	11	7.03941	13
3320	MYO_4310	CP003267 (pSYSA_M)	complement(28300..28641)	342	hypothetical protein	similar to sll7033	AGF53587.1	1.34438	1.55777	18.7891	10	25.2597	16	29.2691	26
1641	at103	CP003265	complement(1803689..1804765)	1077	phytochrome-regulated protein	similar to sll1874	AGF51908.1	1.17633	1.55777	2.98323	5	3.50927	7	4.64719	13
2220	mgtC	CP003265	2479251..2479955	705	Mg2+ transport ATPase	similar to slr0014	AGF52487.1	2.38068	1.54779	10.9376	12	26.039	34	16.9292	31
1798	MYO_118200	CP003265	complement(1974044..1974343)	300	hydrogenase component	similar to ssl3044	AGF52065.1	1.19572	1.54395	55.6909	26	66.5909	37	85.9837	67
3403	MYO_5110	CP003268 (pSYSG_M)	complement(8440..8619)	180	type I restriction-modification system M subunit	similar to ssl8010	AGF53670.1	1.20034	1.54065	49.979	14	59.9918	20	77.0003	36
1041	MYO_110540	CP003265	1156235..1156630	396	hypothetical protein	similar to slr0890	AGF51308.1	1.68048	1.54065	11.3589	7	19.0883	14	17.5001	18
204	MYO_12060	CP003265	226928..227098	171	hypothetical protein	similar to ssr2972	AGF50471.1	1.56044	1.54065	26.3047	7	41.047	13	40.5265	18
480	MYO_14870	CP003265	536973..537920	948	regulatory components of sensory transduction system	similar to slr1760	AGF50747.1	1.43487	1.53934	44.0592	65	63.2192	111	67.822	167
965	MYO_19760	CP003265	1060556..1060894	339	hypothetical protein	similar to slr1437	AGF51232.1	1.69496	1.53918	219.882	116	372.692	234	338.438	298
2398	dgt	CP003265	complement(2677818..2679140)	1323	dGTP triphosphohydrolase	similar to sll0398	AGF52665.1	1.83802	1.53531	7.77127	16	14.2838	35	11.9313	41
3379	MYO_4900	CP003267 (pSYSA_M)	86069..87058	990	hypothetical protein	similar to slr7092	AGF53646.1	1.31077	1.53381	16.2269	25	21.2698	39	24.889	64
782	MYO_17910	CP003265	851372..851797	426	transposase	similar to slr1902	AGF51049.1	1.0503	1.53114	54.3031	34	57.0345	44	83.1459	90
3276	MYO_21170	CP003266 (pSYSM_M)	107105..107527	423	hypothetical protein	similar to slr5116	AGF53543.1	1.83325	1.52509	16.7103	11	30.6341	24	25.4847	28
897	MYO_19080	CP003265	complement(987395..987622)	228	hypothetical protein	similar to ssl2823	AGF51164.1	1.29855	1.52509	31.002	11	40.2577	17	47.2809	28
3258	MYO_2990	CP003266 (pSYSM_M)	complement(94925..95137)	213	hypothetical protein	similar to ssl5098	AGF53525.1	1.0229	1.52391	138.775	46	141.952	56	211.48	117
2749	MYO_127880	CP003265	complement(3078532..3079449)	918	hypothetical protein	similar to sll0777	AGF53016.1	1.61584	1.5209	9.09981	13	14.7039	25	13.8399	33
836	MYO_18450	CP003265	complement(920597..920851)	255	hypothetical protein	similar to ssl3712	AGF51103.1	1.55121	1.5209	32.7593	13	50.8166	24	49.8238	33
1214	rpoE_2	CP003265	complement(1340522..1341082)	561	RNA polymerase sigma-E factor	similar to sll0856	AGF51481.1	1.25594	1.51993	108.816	95	136.666	142	165.393	241
2661	MYO_126990	CP003265	complement(2974354..2975430)	1077	hypothetical protein	similar to sll0102	AGF52928.1	1.62796	1.51658	19.0926	32	31.0821	62	28.9556	81
2239	cobU	CP003265	2505744..2506301	558	cobinamide kinase/cobinamide phosphate guanylyltransferase	similar to slr0216	AGF52506.1	1.3345	1.51548	19.577	17	26.1255	27	29.6686	43
412	MYO_14190	CP003265	451837..453024	1188	PatA subfamily	similar to slr1594	AGF50679.1	1.23564	1.51548	9.19527	17	11.3621	25	13.9352	43
2768	MYO_128070	CP003265	complement(3095997..3098834)	2838	cation-transporting ATPase E1-E2 ATPase	similar to sll0672	AGF53035.1	1.50043	1.51212	9.50974	42	14.2687	75	14.3799	106
1038	MYO_110510	CP003265	1153985..1154491	507	hypothetical protein	similar to slr0888	AGF51305.1	1.79452	1.51161	634.982	501	1139.49	1070	959.846	1264
573	MYO_15800	CP003265	complement(631398..631595)	198	hypothetical protein	similar to ssl1911	AGF50840.1	0.417733	1.51116	12572.6	3874	5252.01	1926	18999.3	9771
2952	nadB	CP003265	complement(3317343..3319004)	1662	L-aspartate oxidase	similar to sll0631	AGF53219.1	1.19338	1.51088	26.6778	69	31.8368	98	40.307	174
168	MYO_11690	CP003265	183493..183849	357	hypothetical protein	similar to slr1417	AGF50435.1	1.32784	1.50872	347.393	193	461.281	305	524.12	486
1968	MYO_119940	CP003265	2175593..2176105	513	hypothetical protein	similar to slr0146	AGF52235.1	1.27554	1.50869	311.899	233	397.84	359	470.558	588
3070	MYO_131180	CP003265	complement(3469604..3470290)	687	response regulator like protein	similar to sll1544	AGF53337.1	1.26036	1.49786	7.48282	8	9.43103	12	11.2082	20
1737	MYO_117590	CP003265	complement(1910039..1910254)	216	hypothetical protein	similar to ssl2162	AGF52004.1	1.51889	1.49786	77.3484	26	117.484	47	115.857	65
2105	MYO_121330	CP003265	2332973..2333593	621	hypothetical protein	similar to slr0184	AGF52372.1	1.49376	1.49786	18.6257	18	27.8223	32	27.8987	45
1367	MYO_113820	CP003265	complement(1514138..1514893)	756	hypothetical protein	similar to sll0249	AGF51634.1	1.26036	1.49786	1.69997	2	2.14256	3	2.54631	5
3548	MYO_31070	CP003269 (pSYSX_M)	100603..101829	1227	hypothetical protein	similar to slr6106	AGF53815.1	1.26036	1.49786	1.04741	2	1.32011	3	1.56887	5
668	MYO_16770	CP003265	complement(741581..742189)	609	fibrillin	similar to sll1568	AGF50935.1	1.14032	1.49786	29.5442	28	33.69	38	44.2531	70
3303	MYO_4140	CP003267 (pSYSA_M)	12674..13438	765	hypothetical protein	similar to slr7013	AGF53570.1	0.980278	1.49786	5.0399	6	4.9405	7	7.54905	15
3289	MYO_21300	CP003266 (pSYSM_M)	complement(116636..116830)	195	hypothetical protein	similar to ssl5129	AGF53556.1	0.420119	1.49786	6.59063	2	2.76885	1	9.87184	5
3102	MYO_131500	CP003265	3509607..3510131	525	transposase	similar to slr0462	AGF53369.1	4.62131	1.49786	2.44795	2	11.3127	10	3.66668	4
2219	MYO_122520	CP003265	2478628..2479155	528	hypothetical protein	similar to slr0013	AGF52486.1	1.48042	1.49786	51.1149	42	75.6715	74	76.5628	105
1044	MYO_110570	CP003265	complement(1160442..1160915)	474	hypothetical protein	similar to sll0864	AGF51311.1	0.840239	1.49786	2.71134	2	2.27817	2	4.0612	5
1794	MYO_118160	CP003265	1970623..1971018	396	transposase	similar to slr1683	AGF52061.1	0	1.49786	3.24539	1	0	0	4.86113	4
532	fur_1	CP003265	complement(582659..583075)	417	ferric uptake regulation protein	similar to sll1937	AGF50799.1	1.79402	1.48976	57.0161	37	102.288	79	84.9404	92
2577	MYO_126150	CP003265	complement(2881188..2881544)	357	hypothetical protein	similar to sll0082	AGF52844.1	1.48042	1.48359	37.7992	21	55.9587	37	56.0787	52
3124	MYO_131720	CP003265	3531256..3532029	774	hypothetical protein	similar to slr0586	AGF53391.1	1.20034	1.48359	17.4345	21	20.9274	30	25.8657	52
1831	MYO_118530	CP003265	complement(2012651..2013256)	606	hypothetical protein	similar to sll0913	AGF52098.1	1.81315	1.48209	20.1471	19	36.5297	41	29.8599	47
2728	MYO_127670	CP003265	3055679..3057607	1929	cation-transporting ATPase E1-E2 ATPase	similar to slr0797	AGF52995.1	1.1498	1.48209	6.32926	19	7.27739	26	9.38055	47
1966	MYO_119920	CP003265	2174383..2175171	789	hypothetical protein	similar to slr0144	AGF52233.1	1.30228	1.47894	399.886	491	520.765	761	591.409	1212
1497	MYO_115140	CP003265	1653412..1653609	198	hypothetical protein	similar to ssr2194	AGF51764.1	0.336095	1.4679	64.9078	20	21.8152	8	95.2782	49
182	MYO_11840	CP003265	197231..197557	327	hypothetical protein	similar to slr1101	AGF50449.1	1.53561	1.46687	56.9878	29	87.511	53	83.5936	71
2421	MYO_124580	CP003265	complement(2702946..2703251)	306	hypothetical protein	similar to sll0376	AGF52688.1	1.35986	1.46632	159.597	76	217.029	123	234.021	186
140	MYO_11410	CP003265	155473..156258	786	hypothetical protein	similar to slr0252	AGF50407.1	0.560159	1.46457	7.35786	9	4.12157	6	10.7761	22
929	sulA	CP003265	1025078..1026097	1020	cell division inhibitor	similar to slr1223	AGF51196.1	1.62796	1.46041	20.1596	32	32.819	62	29.4413	78
2023	MYO_120500	CP003265	complement(2235544..2236221)	678	hypothetical protein	similar to sll1848	AGF52290.1	0.986367	1.45878	21.7987	23	21.5015	27	31.7996	56
3261	MYO_21020	CP003266 (pSYSM_M)	96124..96561	438	hypothetical protein	similar to slr5101	AGF53528.1	1.52151	1.45738	54.2824	37	82.5914	67	79.1099	90
1389	MYO_114040	CP003265	1537385..1537627	243	hypothetical protein	similar to ssr3532	AGF51656.1	0.660187	1.45506	37.0215	14	24.4411	11	53.8686	34
3257	MYO_2980	CP003266 (pSYSM_M)	complement(93862..94866)	1005	hypothetical protein	similar to sll5097	AGF53524.1	1.04393	1.45247	21.0999	33	22.0268	41	30.6469	80
2558	sdhB_2	CP003265	complement(2858369..2859106)	738	succinate dehydrogenase iron-sulfur protein	similar to sll0823	AGF52825.1	1.42194	1.45177	45.2771	52	64.3814	88	65.732	126
3129	MYO_131770	CP003265	3534924..3535478	555	hypothetical protein	similar to slr0589	AGF53396.1	1.16341	1.45177	30.1032	26	35.0222	36	43.7029	63
1791	MYO_118130	CP003265	1967937..1968899	963	hypothetical protein	similar to slr1681	AGF52058.1	1.70758	1.44954	20.6856	31	35.3223	63	29.9846	75
3311	MYO_4220	CP003267 (pSYSA_M)	19929..21659	1731	hypothetical protein	similar to slr7024	AGF53578.1	1.4004	1.44793	17.8187	48	24.9533	80	25.8002	116
3223	MYO_2640	CP003266 (pSYSM_M)	complement(65758..66411)	654	hypothetical protein	similar to sll5063	AGF53490.1	1.39191	1.44642	97.2723	99	135.394	164	140.696	239
781	MYO_17900	CP003265	850260..851240	981	ABC transporter	similar to slr1901	AGF51048.1	1.18622	1.44499	22.2711	34	26.4184	48	32.1816	82
1736	MYO_117580	CP003265	1908968..1909963	996	hypothetical protein	similar to slr1152	AGF52003.1	0.873097	1.44263	230.97	358	201.659	372	333.204	862
1807	nadE	CP003265	1982451..1984127	1677	NH(3)-dependent NAD(+) synthetase	similar to slr1691	AGF52074.1	1.22217	1.43794	21.0747	55	25.7568	80	30.3042	132
2878	MYO_129190	CP003265	3230171..3230449	279	hypothetical protein	similar to ssr1558	AGF53145.1	1.09231	1.43794	23.0318	10	25.1579	13	33.1184	24
2626	MYO_126640	CP003265	2931698..2932588	891	hypothetical protein	similar to slr0522	AGF52893.1	1.00829	1.43794	3.60599	5	3.63587	6	5.18521	12
2692	ppsA	CP003265	3008940..3011396	2457	phosphoenolpyruvate synthase	similar to slr0301	AGF52959.1	1.62551	1.43626	55.9681	214	90.9766	414	80.385	513
629	MYO_16380	CP003265	697490..697960	471	hypothetical protein	similar to slr1391	AGF50896.1	1.27391	1.43021	42.2934	31	53.878	47	60.4886	74
536	MYO_15430	CP003265	586360..586647	288	hypothetical protein	similar to ssr3467	AGF50803.1	1.1926	1.43021	69.1673	31	82.4887	44	98.9241	74
2496	MYO_125330	CP003265	complement(2793706..2793924)	219	hypothetical protein	similar to ssl1690	AGF52763.1	1.13588	1.42574	633.784	216	719.902	292	903.611	514
100	nifS_1	CP003265	complement(116518..117693)	1176	NifS protein	similar to sll0704	AGF50367.1	1.28808	1.42335	107.644	197	138.655	302	153.215	468
3364	MYO_4750	CP003267 (pSYSA_M)	complement(70320..70901)	582	hypothetical protein	similar to sll7077	AGF53631.1	1.47042	1.42297	8.83281	8	12.9879	14	12.5688	19
3498	MYO_3570	CP003269 (pSYSX_M)	54343..54702	360	hypothetical protein	similar to slr6056	AGF53765.1	1.26036	1.42297	14.2797	8	17.9975	12	20.3195	19
2639	MYO_126770	CP003265	2947375..2947611	237	hypothetical protein	similar to ssr1038	AGF52906.1	0.865604	1.42212	718.504	265	621.94	273	1021.8	629
572	MYO_15790	CP003265	complement(630057..631094)	1038	LysR transcriptional regulator	similar to sll0998	AGF50839.1	1.08075	1.42102	166.528	269	179.975	346	236.639	638
254	MYO_12580	CP003265	complement(280970..281443)	474	hypothetical protein	similar to sll1654	AGF50521.1	1.19947	1.41971	187.082	138	224.4	197	265.602	327
3240	MYO_2810	CP003266 (pSYSM_M)	complement(78057..78881)	825	non-heme chloroperoxidase	similar to sll5080	AGF53507.1	1.56427	1.415	73.216	94	114.53	175	103.6	222
2194	MYO_122230	CP003265	2444758..2445390	633	ABC transporter	similar to slr0354	AGF52461.1	1.27716	1.41398	25.3786	25	32.4126	38	35.8848	59
1492	MYO_115090	CP003265	complement(1647910..1648383)	474	hypothetical protein	similar to sll1240	AGF51759.1	1.14272	1.41398	33.8917	25	38.7289	34	47.9222	59
3218	MYO_2590	CP003266 (pSYSM_M)	57972..60323	2352	hypothetical protein	similar to slr5058	AGF53485.1	0.420119	1.41313	54.0953	198	22.7265	99	76.4438	467
2970	MYO_130170	CP003265	3345209..3345469	261	hypothetical protein	similar to ssr1114	AGF53237.1	1.26036	1.41227	34.4683	14	43.4423	21	48.6784	33
907	MYO_19180	CP003265	complement(997665..998573)	909	hypothetical protein	similar to sll1456	AGF51174.1	1.16549	1.41089	21.9144	31	25.5411	43	30.9187	73
3073	MYO_131210	CP003265	3472733..3473575	843	hypothetical protein	similar to slr1668	AGF53340.1	1.30959	1.4105	1144.92	1502	1499.37	2341	1614.91	3536
2566	MYO_126040	CP003265	complement(2867964..2868686)	723	hypothetical protein	similar to sll0088	AGF52833.1	1.19034	1.41048	42.6614	48	50.7814	68	60.1732	113
2333	MYO_123690	CP003265	2607341..2607784	444	CheY subfamily	similar to slr0474	AGF52600.1	1.20606	1.41023	212.748	147	256.587	211	300.024	346
3326	MYO_4370	CP003267 (pSYSA_M)	complement(33790..34080)	291	hypothetical protein	similar to ssl7039	AGF53593.1	1.08737	1.40975	37.5394	17	40.8192	22	52.9212	40
906	rfbJ	CP003265	complement(996505..997461)	957	RfbJ protein	similar to sll1457	AGF51173.1	1.97703	1.40975	11.4148	17	22.5674	40	16.092	40
56	rffM_1	CP003265	67606..68361	756	UDP-N-acetyl-D-mannosaminuronic acid transferase	similar to slr1118	AGF50323.1	1.50749	1.40975	28.8994	34	43.5655	61	40.7409	80
1191	lexA	CP003265	complement(1317189..1317800)	612	SOS function regulatory protein	similar to sll1626	AGF51458.1	1.54884	1.40862	1836.41	1749	2844.32	3224	2586.81	4112
57	MYO_1570	CP003265	complement(68400..69059)	660	hypothetical protein	similar to sll1063	AGF50324.1	1.42645	1.40729	41.8655	43	59.7191	73	58.9169	101
531	MYO_15380	CP003265	complement(581983..582594)	612	hypothetical protein	similar to sll1938	AGF50798.1	1.68048	1.40668	48.299	46	81.1654	92	67.9415	108
1566	MYO_115840	CP003265	complement(1719109..1719594)	486	hypothetical protein	similar to sll1262	AGF51833.1	1.6338	1.40632	95.198	72	155.534	140	133.879	169
660	aspA	CP003265	731919..732785	867	aspartoacylase, ASP	similar to slr1705	AGF50927.1	1.24382	1.40351	188.255	254	234.155	376	264.217	595
2332	phy	CP003265	2605080..2607326	2247	phytochrome	similar to slr0473	AGF52599.1	1.22518	1.40194	232.212	812	284.5	1184	325.547	1900
2374	MYO_124110	CP003265	complement(2648708..2649106)	399	hypothetical protein	similar to sll0614	AGF52641.1	1.96056	1.398	9.66296	6	18.9448	14	13.5088	14
3297	MYO_480	CP003267 (pSYSA_M)	complement(3367..3591)	225	hypothetical protein	similar to ssl7007	AGF53564.1	1.89054	1.398	34.2713	12	64.7911	27	47.9113	28
1107	MYO_111200	CP003265	complement(1230240..1230674)	435	hypothetical protein	similar to sll1764	AGF51374.1	1.8672	1.398	13.2949	9	24.8242	20	18.5863	21
2291	ycf40	CP003265	2561443..2561658	216	YCF40 protein	similar to ssr0102	AGF52558.1	1.45641	1.398	89.2482	30	129.982	52	124.769	70
1922	MYO_119470	CP003265	complement(2115466..2116656)	1191	hypothetical protein	similar to sll0264	AGF52189.1	1.42374	1.398	19.4233	36	27.6537	61	27.1538	84
1280	MYO_112950	CP003265	complement(1408200..1408622)	423	hypothetical protein	similar to sll1960	AGF51547.1	1.4004	1.398	18.2294	12	25.5284	20	25.4847	28
1682	rfbM_1	CP003265	complement(1844264..1845367)	1104	GDP-mannose pyrophosphorylase	similar to sll1370	AGF51949.1	1.30704	1.398	10.477	18	13.6938	28	14.6468	42
3181	MYO_2220	CP003266 (pSYSM_M)	24473..24787	315	hypothetical protein	similar to slr5021	AGF53448.1	1.21368	1.398	36.7192	18	44.5653	26	51.3336	42
1377	MYO_113920	CP003265	1523037..1523555	519	hypothetical protein	similar to slr0271	AGF51644.1	1.12032	1.398	7.42875	6	8.32256	8	10.3854	14
3018	MYO_130660	CP003265	3401553..3401939	387	transposase	similar to slr1585	AGF53285.1	0.560159	1.398	4.98129	3	2.79032	2	6.96386	7
2462	MYO_124990	CP003265	complement(2747845..2748084)	240	hypothetical protein	similar to ssl0331	AGF52729.1	1.68048	1.398	24.097	9	40.4945	18	33.6877	21
3493	MYO_3520	CP003269 (pSYSX_M)	51133..51513	381	hypothetical protein	similar to slr6051	AGF53760.1	1.4004	1.398	5.05974	3	7.08565	5	7.07352	7
1378	MYO_113930	CP003265	1523674..1524651	978	hypothetical protein	similar to slr0272	AGF51645.1	1.26036	1.398	3.94225	6	4.96865	9	5.51127	14
878	MYO_18880	CP003265	complement(968548..968949)	402	hypothetical protein	similar to sll1714	AGF51145.1	1.12032	1.398	4.79542	3	5.3724	4	6.70401	7
1239	MYO_112530	CP003265	1368126..1368488	363	hypothetical protein	similar to slr0870	AGF51506.1	1.06939	1.398	58.417	33	62.4708	42	81.667	77
575	MYO_15830	CP003265	complement(633291..634382)	1092	hypothetical protein	similar to sll0997	AGF50842.1	1.52194	1.39047	62.3756	106	94.9321	192	86.7312	246
350	MYO_13560	CP003265	380030..381175	1146	hypothetical protein	similar to slr1076	AGF50617.1	1.2693	1.3895	26.3539	47	33.4509	71	36.6188	109
2309	MYO_123440	CP003265	complement(2579212..2579661)	450	hypothetical protein	similar to sll0062	AGF52576.1	0.980278	1.38802	85.6782	60	83.9885	70	118.923	139
3188	MYO_2290	CP003266 (pSYSM_M)	complement(30677..30988)	312	hypothetical protein	similar to sll5028	AGF53455.1	1.34788	1.38552	98.8595	48	133.251	77	136.972	111
116	MYO_11160	CP003265	131877..132407	531	hypothetical protein	similar to slr0742	AGF50383.1	1.35731	1.38264	62.9275	52	85.4121	84	87.006	120
1575	MYO_115940	CP003265	1726239..1726775	537	hypothetical protein	similar to slr1340	AGF51842.1	1.16341	1.38264	15.5561	13	18.0981	18	21.5085	30
2142	chlB	CP003265	2392372..2393898	1527	protochlorophyllide reductase ChlB subunit	similar to slr0772	AGF52409.1	1.05177	1.38264	120.354	286	126.584	358	166.405	660
1420	MYO_114360	CP003265	complement(1574393..1575061)	669	hypothetical protein	similar to sll1973	AGF51687.1	1.38091	1.37543	110.46	115	152.535	189	151.929	264
517	psbL	CP003265	570586..570705	120	photosystem II PsbL protein	similar to smr0007	AGF50784.1	1.64912	1.37266	717.555	134	1183.34	263	984.963	307
1864	pilT_1	CP003265	complement(2043547..2044833)	1287	twitching mobility protein	similar to sll1533	AGF52131.1	1.20689	1.37137	247.149	495	298.281	711	338.933	1133
208	ycf10	CP003265	complement(230658..231839)	1182	heme binding protein precursor	similar to sll1685	AGF50475.1	3.00085	1.36947	3.80551	7	11.4198	25	5.21153	16
2632	MYO_126700	CP003265	complement(2939024..2940151)	1128	hypothetical protein	similar to sll0597	AGF52899.1	1.50043	1.36947	31.9015	56	47.8658	100	43.6881	128
2633	MYO_126710	CP003265	complement(2940268..2941002)	735	hypothetical protein	similar to sll0596	AGF52900.1	0.97742	1.36947	42.8391	49	41.8718	57	58.6669	112
2203	MYO_122360	CP003265	complement(2458625..2459446)	822	hypothetical protein	similar to sll0024	AGF52470.1	0.960273	1.36947	16.4165	21	15.7643	24	22.4819	48
1863	MYO_118850	CP003265	complement(2042407..2043543)	1137	hypothetical protein	similar to sll1534	AGF52130.1	1.28984	1.36647	64.4282	114	83.1021	175	88.0391	260
1595	MYO_116140	CP003265	1750420..1751295	876	hypothetical protein	similar to slr1353	AGF51862.1	0.73941	1.36605	18.3387	25	13.5598	22	25.0515	57
1992	MYO_120180	CP003265	complement(2206970..2207206)	237	hypothetical protein	similar to ssl0242	AGF52259.1	1.58712	1.36472	48.8041	18	77.4578	33	66.6037	41
2805	MYO_128440	CP003265	3137575..3137946	372	hypothetical protein	similar to slr0022	AGF53072.1	1.58712	1.36472	31.0929	18	49.3481	34	42.433	41
2008	MYO_120340	CP003265	complement(2222545..2222976)	432	hypothetical protein	similar to sll1862	AGF52275.1	0.660187	1.36472	374.842	252	247.466	198	511.553	574
418	hsp17	CP003265	complement(460352..460792)	441	16.6 kDa small heat shock protein, molecular chaperon	similar to sll1514	AGF50685.1	0.706287	1.36327	100.541	69	71.0107	58	137.064	157
392	MYO_13980	CP003265	complement(427879..428646)	768	hypothetical protein	similar to sll0645	AGF50659.1	1.29037	1.36234	70.2829	84	90.6907	129	95.7491	191
3241	MYO_2820	CP003266 (pSYSM_M)	complement(79505..80293)	789	hypothetical protein	similar to sll5081	AGF53508.1	1.22217	1.36169	8.95875	11	10.9491	16	12.199	25
430	MYO_14370	CP003265	complement(469103..469648)	546	hypothetical protein	similar to sll1507	AGF50697.1	1.33674	1.36169	77.6753	66	103.832	105	105.77	150
2431	folE	CP003265	2715318..2716022	705	GTP cyclohydrolase I	similar to slr0426	AGF52698.1	1.32422	1.36125	113.934	125	150.873	197	155.093	284
414	MYO_14210	CP003265	complement(454814..456688)	1875	hypothetical protein	similar to sll1516	AGF50681.1	0.962773	1.36056	16.4502	48	15.8378	55	22.3814	109
2030	dpm1_2	CP003265	2242903..2243898	996	dolichol phosphate mannose synthase	similar to slr1943	AGF52297.1	1.68048	1.35806	19.355	30	32.5257	60	26.2853	68
2850	MYO_128890	CP003265	complement(3198209..3198721)	513	hypothetical protein	similar to sll0508	AGF53117.1	0.784223	1.35806	18.7891	15	14.7348	14	25.5167	34
2168	MYO_121970	CP003265	2417297..2418712	1416	amine oxidase	similar to slr0782	AGF52435.1	1.60634	1.35688	15.4293	34	24.7847	65	20.9358	77
1979	frr	CP003265	complement(2189401..2189949)	549	ribosome releasing factor	similar to sll0145	AGF52246.1	1.30528	1.35655	186.104	159	242.918	247	252.46	360
932	MYO_19430	CP003265	complement(1028992..1029738)	747	hypothetical protein	similar to sll1138	AGF51199.1	2.07848	1.35596	32.6885	38	67.9425	94	44.3242	86
1172	hofG_2	CP003265	complement(1295463..1295969)	507	general secretion pathway protein G	similar to sll1694	AGF51439.1	1.13506	1.35555	18740.2	14786	21271.2	19974	25403.3	33453
1914	nusB	CP003265	complement(2102211..2103038)	828	N utilization substance protein B	similar to sll0271	AGF52181.1	1.62568	1.35459	35.6993	46	58.0355	89	48.3577	104
31	fhuA_3	CP003265	39802..42363	2562	ferrichrome-iron receptor	similar to slr1490	AGF50298.1	1.20556	1.35459	5.76873	23	6.95455	33	7.81424	52
188	MYO_11900	CP003265	complement(208549..209427)	879	hypothetical protein	similar to sll1036	AGF50455.1	1.1138	1.35156	31.4348	43	35.0123	57	42.486	97
1356	MYO_113710	CP003265	complement(1505345..1505884)	540	hypothetical protein	similar to sll0253	AGF51623.1	1.2977	1.3514	107.098	90	138.981	139	144.732	203
3360	MYO_4710	CP003267 (pSYSA_M)	63824..64168	345	hypothetical protein	similar to slr7073	AGF53627.1	1.35617	1.3507	212.333	114	287.961	184	286.798	257
2160	psbT	CP003265	2411852..2411947	96	photosystem II PsbT protein	similar to smr0001	AGF52427.1	1.24763	1.35022	4196.9	627	5236.16	931	5666.74	1413
1969	MYO_119950	CP003265	2175895..2176773	879	hypothetical protein	similar to slr0147	AGF52236.1	1.16649	1.34905	337.011	433	393.12	623	454.644	993
1454	hflX	CP003265	1611266..1612870	1605	GTP-binding protein HflX	similar to slr1521	AGF51721.1	1.19572	1.34807	20.819	52	24.8938	74	28.0655	117
1198	MYO_112110	CP003265	1324185..1324604	420	hypothetical protein	similar to slr1738	AGF51465.1	1.0713	1.34807	61.1987	40	65.5625	51	82.5004	90
2600	MYO_126380	CP003265	complement(2907243..2908142)	900	NarL subfamily	similar to sll0485	AGF52867.1	1.00829	1.34807	14.2797	20	14.398	24	19.2501	45
1942	MYO_119670	CP003265	complement(2135991..2136410)	420	hypothetical protein	similar to sll0364	AGF52209.1	0.840239	1.34807	12.2397	8	10.2843	8	16.5001	18
3522	MYO_3810	CP003269 (pSYSX_M)	77205..77669	465	hypothetical protein	similar to slr6080	AGF53789.1	0.630179	1.34807	5.52763	0	3.48339	0	7.45165	0
2729	MYO_127680	CP003265	complement(3057737..3058063)	327	hypothetical protein	similar to sll0793	AGF52996.1	0.630179	1.34807	7.86039	4	4.95345	3	10.5964	9
3327	MYO_4380	CP003267 (pSYSA_M)	34198..34449	252	hypothetical protein	similar to ssr7040	AGF53594.1	1.52293	1.34807	40.7992	16	62.1344	29	55.0002	36
800	MYO_18090	CP003265	878592..878864	273	hypothetical protein	similar to ssr2009	AGF51067.1	1.47042	1.34807	18.8304	8	27.6885	14	25.3847	18
3502	MYO_3610	CP003269 (pSYSX_M)	complement(57133..57666)	534	hypothetical protein	similar to sll6060	AGF53769.1	1.47042	1.34807	4.81338	4	7.07768	7	6.48879	9
82	mutT	CP003265	complement(95818..96228)	411	mutator MutT protein	similar to sll1045	AGF50349.1	1.0503	1.34807	6.25389	4	6.56845	5	8.43069	9
3433	MYO_5410	CP003268 (pSYSG_M)	complement(37299..38048)	750	hypothetical protein	similar to sll8040	AGF53700.1	1.0503	1.34807	3.42713	4	3.59951	5	4.62002	9
198	ccmk	CP003265	complement(219206..219517)	312	carbon dioxide concentrating mechanism protein CcmK	similar to sll1028	AGF50465.1	1.38526	1.34593	1295.47	629	1794.56	1037	1743.61	1413
2536	MYO_125740	CP003265	2830646..2833135	2490	PleD-like protein	similar to slr0829	AGF52803.1	1.18902	1.34525	13.6776	53	16.2628	75	18.3997	119
1136	MYO_111490	CP003265	complement(1258230..1259522)	1293	processing protease	similar to sll2008	AGF51403.1	1.0298	1.34442	81.5037	164	83.9328	201	109.575	368
1591	MYO_116100	CP003265	complement(1745989..1747362)	1374	hypothetical protein	similar to sll1247	AGF51858.1	1.14136	1.34374	80.9079	173	92.3455	235	108.72	388
2100	MYO_121280	CP003265	complement(2327414..2327626)	213	hypothetical protein	similar to ssl0294	AGF52367.1	1.1967	1.34353	99.5557	33	119.139	47	133.756	74
2499	MYO_125360	CP003265	2795340..2795678	339	hypothetical protein	similar to slr0923	AGF52766.1	1.07063	1.34324	235.046	124	251.647	158	315.724	278
1037	MYO_110500	CP003265	1152947..1153756	810	hypothetical protein	similar to slr0887	AGF51304.1	0.869212	1.34291	23.0062	29	19.9973	30	30.8952	65
1317	thdF	CP003265	complement(1454222..1455592)	1371	thiophen and furan oxidation protein	similar to sll1615	AGF51584.1	1.556	1.34253	25.3098	54	39.3819	100	33.979	121
693	MYO_17020	CP003265	768000..768461	462	hypothetical protein	similar to slr2025	AGF50960.1	1.75864	1.34227	179.424	129	315.541	270	240.834	289
2337	purN	CP003265	2610985..2611638	654	phosphoribosylglycinamide formyltransferase	similar to slr0477	AGF52604.1	1.47882	1.34208	24.5637	25	36.3253	44	32.9665	56
1582	MYO_116010	CP003265	1736653..1737504	852	hypothetical protein	similar to slr1344	AGF51849.1	1.24355	1.34208	18.8552	25	23.4475	37	25.3053	56
636	MYO_16450	CP003265	705557..706633	1077	hypothetical protein	similar to slr1395	AGF50903.1	1.36039	1.34094	12.5295	21	17.045	34	16.8014	47
2705	MYO_127440	CP003265	3029764..3032043	2280	sensory transduction histidine kinase	similar to slr0311	AGF52972.1	1.08031	1.34094	5.91856	21	6.39386	27	7.93644	47
1541	MYO_115580	CP003265	1696462..1697235	774	hypothetical protein	similar to slr0812	AGF51808.1	1.08031	1.34094	17.4345	21	18.8346	27	23.3787	47
2276	efp	CP003265	2546656..2547219	564	elongation factor P	similar to slr0434	AGF52543.1	1.12576	1.33789	117.352	103	132.11	138	157.004	230
1667	MYO_116870	CP003265	complement(1828022..1828966)	945	hypothetical protein	similar to sll1384	AGF51934.1	1.2646	1.33748	67.3186	99	85.1312	149	90.0374	221
3189	MYO_2300	CP003266 (pSYSM_M)	31397..32062	666	transposase	similar to slr5029	AGF53456.1	1.29267	1.33655	12.543	10	16.214	16	16.7643	29
981	MYO_19930	CP003265	complement(1084412..1087408)	2997	sensory transduction histidine kinase	similar to sll1353	AGF51248.1	1.26036	1.33655	11.1493	52	14.0521	78	14.9016	116
3482	MYO_3410	CP003269 (pSYSX_M)	35381..36079	699	two-component response regulator	similar to slr6040	AGF53749.1	1.29855	1.33446	20.2245	22	26.2625	34	26.9887	49
150	MYO_11510	CP003265	complement(164037..165821)	1785	putative FMN-protein	similar to sll0219	AGF50417.1	1.16605	1.33279	17.6396	49	20.5686	68	23.5099	109
3407	MYO_5150	CP003268 (pSYSG_M)	9948..10373	426	hypothetical protein	similar to slr8014	AGF53674.1	2.00724	1.33143	27.1516	18	54.4996	43	36.1504	40
1430	MYO_114460	CP003265	1585700..1586296	597	hypothetical protein	similar to slr1505	AGF51697.1	1.28214	1.33143	145.309	135	186.306	206	193.468	300
509	MYO_15160	CP003265	562607..562792	186	hypothetical protein	similar to ssr3129	AGF50776.1	1.21368	1.33143	31.0929	9	37.7368	13	41.398	20
1222	dnaA	CP003265	complement(1348706..1350049)	1344	chromosomal replication initiator protein DnaA	similar to sll0848	AGF51489.1	1.18256	1.33143	12.9091	27	15.2658	38	17.1876	60
2793	MYO_128320	CP003265	3120450..3122303	1854	hypothetical protein	similar to slr0765	AGF53060.1	1.00998	1.33143	34.3129	99	34.6555	119	45.6852	220
634	MYO_16430	CP003265	703892..704347	456	hypothetical protein	similar to slr1394	AGF50901.1	1.39835	1.32949	193.058	137	269.963	228	256.668	304
3005	ndh_3	CP003265	complement(3387295..3388869)	1575	NADH dehydrogenase	similar to sll1484	AGF53272.1	1.49782	1.32854	18.7676	46	28.1104	82	24.9334	102
1343	MYO_113580	CP003265	complement(1483028..1484734)	1707	hypothetical protein	similar to sll1595	AGF51610.1	1.09596	1.32854	8.65817	23	9.48904	30	11.5027	51
1171	hofG_1	CP003265	complement(1294852..1295364)	513	general secretion pathway protein G	similar to sll1695	AGF51438.1	1.18594	1.32839	438.412	350	519.929	494	582.381	776
1123	MYO_111360	CP003265	1243201..1243779	579	hypothetical protein	similar to slr1885	AGF51390.1	1.10631	1.3281	66.5893	60	73.6687	79	88.4374	133
3515	MYO_3740	CP003269 (pSYSX_M)	69754..71157	1404	hypothetical protein	similar to slr6073	AGF53782.1	1.36255	1.32783	16.9343	0	23.0738	0	22.4859	0
612	clcD	CP003265	complement(677785..678525)	741	dienelactone hydrolase	similar to sll1298	AGF50879.1	1.54867	1.32751	44.2266	51	68.4927	94	58.7115	113
265	trmD	CP003265	complement(292790..293485)	696	tRNA (m1G37) methyltransferase	similar to sll1198	AGF50532.1	1.15327	1.32751	47.0861	51	54.3029	70	62.5075	113
3091	MYO_131390	CP003265	complement(3499395..3499676)	282	hypothetical protein	similar to ssl0832	AGF53358.1	1.56044	1.32667	95.7044	42	149.341	78	126.969	93
191	phb	CP003265	210781..211629	849	prohibitin	similar to slr1106	AGF50458.1	1.14032	1.32667	42.385	56	48.3326	76	56.2311	124
461	MYO_14680	CP003265	505458..506261	804	hypothetical protein	similar to slr1053	AGF50728.1	1.32037	1.32667	22.3786	28	29.5482	44	29.6892	62
3068	degT	CP003265	3468144..3469301	1158	pleiotropic regulatory protein	similar to slr1666	AGF53335.1	1.1382	1.32576	78.2424	141	89.0552	191	103.731	312
278	MYO_12820	CP003265	306844..308076	1233	hypothetical protein	similar to slr1303	AGF50545.1	1.45132	1.32538	17.1982	33	24.9601	57	22.7941	73
2750	pknA_4	CP003265	complement(3079419..3080936)	1518	eukaryotic protein kinase	similar to sll0776	AGF53017.1	1.22217	1.32538	13.9693	33	17.0728	48	18.5146	73
868	ccmK_2	CP003265	955460..955771	312	carbon dioxide concentrating mechanism protein CcmK	similar to slr1838	AGF51135.1	1.66279	1.32442	195.659	95	325.34	188	259.136	210
2465	MYO_125020	CP003265	complement(2752971..2756930)	3960	hypothetical protein	similar to sll0178	AGF52732.1	1.0126	1.32119	6.32851	39	6.40821	47	8.36115	86
355	MYO_13610	CP003265	383300..383794	495	hypothetical protein	similar to slr1079	AGF50622.1	1.48951	1.32084	57.1188	44	85.0793	78	75.4448	97
1398	ilvG	CP003265	1547342..1549207	1866	acetohydroxy acid synthase	similar to slr2088	AGF51665.1	1.26332	1.32065	195.6	568	247.104	854	258.318	1252
1145	MYO_111580	CP003265	complement(1267877..1269208)	1332	hypothetical protein	similar to sll2003	AGF51412.1	0.7545	1.32056	23.6387	49	17.8354	44	31.2164	108
263	ycf19	CP003265	290902..291174	273	YCF19 protein	similar to ssr2142	AGF50530.1	1.42586	1.31812	388.377	165	553.77	280	511.925	363
1577	MYO_115960	CP003265	complement(1728635..1729675)	1041	hemolysin	similar to sll1254	AGF51844.1	1.38173	1.31812	27.7775	45	38.3809	74	36.614	99
1099	exoD	CP003265	1224398..1225036	639	exopolysaccharide synthesis protein ExoD	similar to slr1875	AGF51366.1	1.12032	1.31812	15.0842	15	16.8991	20	19.8827	33
2045	MYO_120720	CP003265	complement(2261758..2262048)	291	hypothetical protein	similar to ssl1807	AGF52312.1	1.00829	1.31812	44.164	20	44.53	24	58.2133	44
3236	MYO_2770	CP003266 (pSYSM_M)	complement(74510..75055)	546	hypothetical protein	similar to sll5076	AGF53503.1	3.19291	1.31812	5.88449	5	18.7886	19	7.75644	11
1504	MYO_115210	CP003265	complement(1660191..1660754)	564	hypothetical protein	similar to sll1232	AGF51771.1	2.01657	1.31812	5.69669	5	11.4878	12	7.5089	11
2682	brkB	CP003265	2998054..2999010	957	serum resistance locus BrkB	similar to slr0119	AGF52949.1	1.57965	1.31812	16.7865	25	26.5168	47	22.1265	55
2107	MYO_121350	CP003265	complement(2334329..2335717)	1389	hypothetical protein	similar to sll0154	AGF52374.1	1.26036	1.31812	120.283	260	151.599	390	158.546	572
3455	MYO_3140	CP003269 (pSYSX_M)	13483..15039	1557	hypothetical protein	similar to slr6013	AGF53722.1	1.01775	1.31643	29.3023	0	29.8225	0	38.5744	0
1225	MYO_112390	CP003265	complement(1352066..1352374)	309	hypothetical protein	similar to sll0846	AGF51492.1	0.922615	1.31577	106.058	51	97.8507	56	139.548	112
3186	MYO_2270	CP003266 (pSYSM_M)	complement(28096..30168)	2073	hypothetical protein	similar to sll5026	AGF53453.1	0.940702	1.31551	28.5181	92	26.827	103	37.5158	202
2986	rpoF	CP003265	3368514..3369290	777	RNA polymerase sigma-37	similar to slr1564	AGF53253.1	1.40894	1.31519	135.63	164	191.094	275	178.379	360
2734	MYO_127730	CP003265	complement(3062885..3063475)	591	hypothetical protein	similar to sll0788	AGF53001.1	0.910258	1.31479	39.1423	15	35.6296	19	51.4639	32
1970	MYO_119960	CP003265	2176727..2177287	561	ferredoxin	similar to slr0148	AGF52237.1	1.36432	1.31405	337.902	295	461.006	479	444.022	647
1113	MYO_111260	CP003265	1234786..1235919	1134	hypothetical protein	similar to slr1880	AGF51380.1	1.32499	1.31351	14.733	26	19.5211	41	19.3519	57
784	MYO_17930	CP003265	complement(852125..852553)	429	transposase	similar to sll1792	AGF51051.1	1.44041	1.31241	31.4553	9	45.3085	9	41.2822	25
1165	MYO_111780	CP003265	1289550..1290026	477	hypothetical protein	similar to slr1812	AGF51432.1	0.640182	1.31241	28.29	21	18.1107	16	37.128	46
2671	MYO_127100	CP003265	complement(2986075..2987778)	1704	ABC1-like protein	similar to sll0095	AGF52938.1	1.20784	1.31063	24.1347	64	29.1509	92	31.6316	140
3159	MYO_132070	CP003265	3567802..3568494	693	hypothetical protein	similar to slr0610	AGF53426.1	0.997783	1.31063	14.8361	16	14.8032	19	19.4445	35
2689	fraH	CP003265	3006731..3007363	633	heterocyst to vegetative cell connection protein	similar to slr0298	AGF52956.1	1.19446	1.30989	103.545	102	123.68	145	135.633	223
1898	MYO_119220	CP003265	complement(2085398..2085760)	363	hypothetical protein	similar to sll0426	AGF52165.1	1.42645	1.30976	456.715	258	651.481	438	598.184	564
3518	MYO_3770	CP003269 (pSYSX_M)	complement(75277..76047)	771	hypothetical protein	similar to sll6076	AGF53785.1	1.49376	1.30924	22.503	0	33.6141	0	29.4619	0
1754	MYO_117760	CP003265	complement(1926194..1926490)	297	hypothetical protein	similar to ssl2148	AGF52021.1	1.26036	1.30866	82.2165	38	103.622	57	107.593	83
724	leuS	CP003265	complement(806371..808980)	2610	leucyl-tRNA synthetase	similar to sll1074	AGF50991.1	1.0419	1.30784	43.0853	175	44.8904	217	56.3489	382
2180	hypF	CP003265	complement(2429726..2432029)	2304	transcriptional regulatory protein HypF	similar to sll0322	AGF52447.1	1.06939	1.30722	3.06791	11	3.2808	14	4.01043	24
2900	MYO_129410	CP003265	complement(3257405..3258544)	1140	hypothetical protein	similar to sll0528	AGF53167.1	0.766228	1.30694	108.789	193	83.357	176	142.18	421
1200	MYO_112130	CP003265	1325350..1325718	369	photosystem II 13kD protein (PsbW)-like protein	similar to slr1739	AGF51467.1	1.30425	1.3056	116.676	67	152.174	104	152.331	146
2114	psbI	CP003265	complement(2347407..2347523)	117	photosystem II PsbI protein	similar to sml0001	AGF52381.1	1.25151	1.3055	1043.52	190	1305.98	283	1362.31	414
1493	MYO_115100	CP003265	complement(1648376..1648912)	537	hypothetical protein	similar to sll1239	AGF51760.1	0.95027	1.30528	100.516	84	95.5177	95	131.202	183
213	pdxJ	CP003265	237660..238325	666	pyridoxal phosphate biosynthetic protein PdxJ	similar to slr1779	AGF50480.1	1.07089	1.30402	49.2071	51	52.6955	65	64.167	111
2265	MYO_123000	CP003265	complement(2535163..2536074)	912	hypothetical protein	similar to sll0191	AGF52532.1	1.3345	1.30402	23.9561	34	31.9693	54	31.2392	74
2631	queA	CP003265	complement(2937834..2938934)	1101	queuosine biosynthesis protein QueA	similar to sll0467	AGF52898.1	0.988516	1.30402	9.92187	17	9.80792	20	12.9383	37
2326	fmt	CP003265	2597973..2598965	993	methionyl-tRNA formyltransferase	similar to slr0070	AGF52593.1	0.914377	1.30402	22.002	34	20.1181	37	28.691	74
315	epsB	CP003265	complement(345536..347806)	2271	exopolysaccharide export protein	similar to sll0923	AGF50582.1	1.36976	1.30353	183.637	649	251.538	1058	239.376	1412
72	gmk	CP003265	84122..84697	576	guanylate kinase	similar to slr1123	AGF50339.1	1.27862	1.30249	25.6588	23	32.808	35	33.4203	50
3328	MYO_4390	CP003267 (pSYSA_M)	34440..34802	363	hypothetical protein	similar to slr7041	AGF53595.1	1.09596	1.30249	40.7149	23	44.622	30	53.0305	50
2758	MYO_127970	CP003265	3089032..3090285	1254	hypothetical protein	similar to slr0702	AGF53025.1	1.0563	1.301	17.935	35	18.9448	44	23.3334	76
751	infA	CP003265	complement(831010..831213)	204	initiation factor IF-1	similar to ssl3441	AGF51018.1	0.974082	1.29903	711.885	226	693.435	262	924.759	490
635	MYO_16440	CP003265	complement(704809..705519)	711	hypothetical protein	similar to sll1286	AGF50902.1	1.43541	1.29814	65.0721	72	93.405	123	84.473	156
105	MYO_11050	CP003265	complement(121706..121990)	285	hypothetical protein	similar to ssl1326	AGF50372.1	1.54044	1.29814	13.5281	6	20.8393	11	17.5615	13
1855	bgl	CP003265	complement(2035380..2036996)	1617	beta-glucosidase	similar to sll1538	AGF52122.1	1.43541	1.29814	9.53747	24	13.6902	41	12.381	52
1370	MYO_113850	CP003265	1517583..1518422	840	hypothetical protein	similar to slr0267	AGF51637.1	1.43541	1.29814	18.3596	24	26.3535	41	23.8334	52
1895	MYO_119180	CP003265	2083094..2083378	285	hypothetical protein	similar to ssr0761	AGF52162.1	1.12032	1.29814	13.5281	6	15.1558	8	17.5615	13
2111	MYO_121390	CP003265	2343064..2343813	750	hypothetical protein	similar to slr0361	AGF52378.1	1.02029	1.29814	35.9849	42	36.715	51	46.7135	91
1078	MYO_110910	CP003265	1199363..1199989	627	hypothetical protein	similar to slr1862	AGF51345.1	0.560159	1.29814	6.14916	6	3.44451	4	7.98249	13
3002	MYO_130500	CP003265	3384044..3385732	1689	hypothetical protein	similar to slr1579	AGF53269.1	1.01692	1.29628	81.4172	214	82.7951	259	105.539	463
340	MYO_13460	CP003265	370285..371490	1206	hypothetical protein	similar to slr1066	AGF50607.1	1.59474	1.29611	26.1084	49	41.6361	93	33.8393	106
1405	ilvB	CP003265	complement(1554944..1556596)	1653	acetolactate synthase	similar to sll1981	AGF51672.1	1.19072	1.29594	140.724	362	167.563	513	182.369	783
2497	MYO_125340	CP003265	2794307..2794693	387	hypothetical protein	similar to slr0921	AGF52764.1	1.34829	1.29582	71.3985	43	96.2659	69	92.5198	93
361	MYO_13670	CP003265	386783..388057	1275	hypothetical protein	similar to slr1085	AGF50628.1	0.859779	1.29582	21.6716	43	18.6327	44	28.0825	93
2998	MYO_130460	CP003265	complement(3380844..3381113)	270	hypothetical protein	similar to ssl2874	AGF53265.1	1.29397	1.29415	118.998	50	153.979	77	154.001	108
1487	MYO_115040	CP003265	complement(1639747..1640676)	930	hypothetical protein	similar to sll1995	AGF51754.1	1.81492	1.29415	17.2738	25	31.3506	54	22.3549	54
1224	purT	CP003265	1350726..1351901	1176	glycinamide ribonucleotide transformylase	similar to slr0861	AGF51491.1	1.20459	1.29373	61.7452	113	74.3776	162	79.8813	244
1630	MYO_116490	CP003265	complement(1791253..1792077)	825	hypothetical protein	similar to sll1882	AGF51897.1	1.40915	1.2919	74.7737	96	105.367	161	96.6004	207
1849	MYO_118710	CP003265	complement(2029470..2030942)	1473	lignostilbene-alpha,beta-dioxygenase	similar to sll1541	AGF52116.1	1.21368	1.28982	31.4095	72	38.1211	104	40.5127	155
543	MYO_15500	CP003265	complement(597986..598432)	447	hypothetical protein	similar to sll1934	AGF50810.1	1.40922	1.28792	182.569	127	257.28	213	235.135	273
295	MYO_13000	CP003265	327100..327552	453	hypothetical protein	similar to slr0967	AGF50562.1	1.80219	1.28788	303.562	214	547.078	459	390.951	460
230	MYO_12320	CP003265	256647..257279	633	hypothetical protein	similar to slr1790	AGF50497.1	1.00829	1.28483	91.3631	90	92.1201	108	117.386	193
1238	MYO_112520	CP003265	1365599..1368037	2439	hypothetical protein	similar to slr0869	AGF51505.1	1.00627	1.28439	43.9984	167	44.2744	200	56.5111	358
672	MYO_16810	CP003265	complement(745804..746520)	717	hypothetical protein	similar to sll1925	AGF50939.1	1.50043	1.28388	75.2821	84	112.955	150	96.6532	180
2272	MYO_123070	CP003265	complement(2542390..2543649)	1260	hypothetical protein	similar to sll0412	AGF52539.1	0.990281	1.28388	14.2797	28	14.1409	33	18.3334	60
3259	MYO_21000	CP003266 (pSYSM_M)	complement(95256..95549)	294	hypothetical protein	similar to ssl5099	AGF53526.1	0.360102	1.28388	15.2997	7	5.50945	3	19.6429	15
27	MYO_1270	CP003265	33891..35489	1599	hypothetical protein	similar to slr1484	AGF50294.1	1.20034	1.28388	2.81308	7	3.37665	10	3.61165	15
285	hemF	CP003265	complement(315882..316904)	1023	coproporphyrinogen III oxidase	similar to sll1185	AGF50552.1	1.01775	1.28267	89.1958	142	90.7794	172	114.409	304
2821	MYO_128600	CP003265	complement(3159167..3159943)	777	hypothetical protein	similar to sll0034	AGF53088.1	1.19314	1.28217	41.3505	50	49.3369	71	53.0183	107
132	MYO_11320	CP003265	complement(148022..148942)	921	arginase	similar to sll0228	AGF50399.1	1.00829	1.28125	45.3509	65	45.7266	78	58.1056	139
2899	MYO_129400	CP003265	complement(3254961..3257156)	2196	hypothetical protein	similar to sll0529	AGF53166.1	1.11413	1.28104	52.9637	181	59.0083	240	67.8487	387
1656	MYO_116750	CP003265	complement(1821135..1821599)	465	hypothetical protein	similar to sll1388	AGF51923.1	1.5659	1.27999	30.402	22	47.6064	41	38.9142	47
1416	MYO_114320	CP003265	1568057..1568488	432	hypothetical protein	similar to slr2101	AGF51683.1	0.993009	1.27999	32.7243	22	32.4956	26	41.8868	47
2698	MYO_127370	CP003265	complement(3019161..3019676)	516	hypothetical protein	similar to sll0286	AGF52965.1	1.18088	1.27925	46.077	37	54.4112	52	58.9441	79
2035	odhB	CP003265	complement(2248924..2250225)	1302	dihydrolipoamide acetyltransferase component (E2) of pyruvate dehydrogenase complex	similar to sll1841	AGF52302.1	1.32995	1.27915	160.893	326	213.98	516	205.807	696
255	gerCb	CP003265	complement(281507..282223)	717	spore germination protein c2	similar to sll1653	AGF50522.1	1.26036	1.27894	46.6032	52	58.7367	78	59.6028	111
3271	MYO_21120	CP003266 (pSYSM_M)	103631..104083	453	hypothetical protein	similar to slr5111	AGF53538.1	1.27446	1.27871	211.359	149	269.367	226	270.266	318
1236	MYO_112500	CP003265	1364041..1364685	645	hypothetical protein	similar to slr0867	AGF51503.1	0.728207	1.27817	14.9439	15	10.8822	13	19.1009	32
270	MYO_12740	CP003265	complement(298083..298580)	498	hypothetical protein	similar to sll1193	AGF50537.1	1.20745	1.27817	174.195	135	210.333	194	222.652	288
1449	leuB	CP003265	1606701..1607789	1089	3-isopropylmalate dehydrogenase	similar to slr1517	AGF51716.1	1.16151	1.27759	40.1248	68	46.6052	94	51.2629	145
2851	MYO_128900	CP003265	3198957..3199958	1002	hypothetical protein	similar to slr0537	AGF53118.1	1.47386	1.27686	39.1196	61	57.6568	107	49.9503	130
368	MYO_13740	CP003265	complement(394098..396119)	2022	hypothetical protein	similar to sll1021	AGF50635.1	1.49782	1.27644	36.5467	115	54.7403	205	46.6496	245
2350	thrA	CP003265	complement(2623841..2625142)	1302	homoserine dehydrogenase	similar to sll0455	AGF52617.1	1.26036	1.27644	68.1083	138	85.8408	207	86.9359	294
448	MYO_14550	CP003265	489824..490990	1167	PatA subfamily	similar to slr1041	AGF50715.1	1.54653	1.27644	37.9936	69	58.758	127	48.4964	147
1768	MYO_117900	CP003265	complement(1940703..1941170)	468	hypothetical protein	similar to sll1086	AGF52035.1	1.36421	1.2757	244.403	178	333.416	289	311.786	379
1977	MYO_120030	CP003265	complement(2185498..2187504)	2007	hypothetical protein	similar to sll0147	AGF52244.1	1.37885	1.2751	24.9735	78	34.4348	128	31.8437	166
1376	nblA_2	CP003265	complement(1522265..1522453)	189	phycobilisome degradation protein NblA	similar to ssl0452	AGF51643.1	0.86151	1.27413	268.594	79	231.397	81	342.224	168
718	hypB_1	CP003265	complement(798501..799190)	690	hydrogenase expression/formation protein HypB	similar to sll1079	AGF50985.1	1.89054	1.27318	7.45028	8	14.085	18	9.48555	17
3040	MYO_130880	CP003265	complement(3425552..3427294)	1743	hypothetical protein	similar to sll0727	AGF53307.1	1.26036	1.27318	2.94934	8	3.71722	12	3.75504	17
3296	MYO_470	CP003267 (pSYSA_M)	complement(3041..3364)	324	hypothetical protein	similar to sll7006	AGF53563.1	1.36539	1.27318	15.8663	8	21.6637	13	20.2007	17
3054	MYO_131020	CP003265	complement(3452329..3453045)	717	hypothetical protein	similar to sll1549	AGF53321.1	0.840239	1.27318	7.16973	8	6.02428	8	9.12835	17
1201	MYO_112140	CP003265	1325837..1327585	1749	extracellular solute-binding protein	similar to slr1740	AGF51468.1	1.22405	1.27226	29.7596	81	36.4273	118	37.8618	172
2853	MYO_128920	CP003265	complement(3201263..3202012)	750	hypothetical protein	similar to sll0506	AGF53120.1	1.45505	1.27135	35.1281	41	51.113	71	44.6602	87
281	MYO_12850	CP003265	312258..313715	1458	hypothetical protein	similar to slr1306	AGF50548.1	1.4665	1.27085	141.916	322	208.12	562	180.354	683
1544	ndhL	CP003265	1699362..1699604	243	NADH dehydrogenase subunit NdhL	similar to ssr1386	AGF51811.1	1.56044	1.27071	240.64	91	375.504	169	305.783	193
2565	MYO_126030	CP003265	2867020..2867967	948	sensory transduction histidine kinase	similar to slr0073	AGF52832.1	1.36731	1.27028	332.817	491	455.064	799	422.771	1041
3365	MYO_4760	CP003267 (pSYSA_M)	complement(70925..71791)	867	hypothetical protein	similar to sll7078	AGF53632.1	1.3345	1.26877	12.5997	17	16.8143	27	15.9862	36
3106	MYO_131540	CP003265	3514936..3515403	468	hypothetical protein	similar to slr1178	AGF53373.1	1.27652	1.26742	71.3985	52	91.1414	79	90.4919	110
1552	int	CP003265	1705786..1707345	1560	apolipoprotein N-acyltransferase	similar to slr0819	AGF51819.1	1.29267	1.26742	10.7098	26	13.8443	40	13.5738	55
1169	MYO_111820	CP003265	1291868..1294021	2154	hypothetical protein	similar to slr1816	AGF51436.1	1.09877	1.26742	23.2692	78	25.5675	102	29.4918	165
62	MYO_1620	CP003265	complement(73978..74229)	252	hypothetical protein	similar to ssl2069	AGF50329.1	1.06646	1.26742	66.2986	26	70.7046	32	84.0282	55
253	birA	CP003265	complement(280127..280951)	825	biotin [acetyl-CoA-carboxylase] ligase	similar to sll1655	AGF50520.1	1.18594	1.26676	136.306	175	161.651	247	172.667	370
1501	MYO_115180	CP003265	1658538..1658756	219	hypothetical protein	similar to ssr2201	AGF51768.1	1.02696	1.26486	26.4077	9	27.1196	11	33.402	19
1726	MYO_117480	CP003265	complement(1896906..1897709)	804	hypothetical protein	similar to sll1439	AGF51993.1	1.96056	1.26486	7.19314	9	14.1025	21	9.0983	19
2429	MYO_124660	CP003265	complement(2714003..2714431)	429	hypothetical protein	similar to sll0369	AGF52696.1	1.12032	1.26486	13.4808	9	15.1028	12	17.0514	19
1438	plsX	CP003265	1595264..1596310	1047	PlsX protein	similar to slr1510	AGF51705.1	1.1169	1.26405	50.3268	82	56.2101	109	63.6154	173
394	MYO_14000	CP003265	429912..430271	360	hypothetical protein	similar to slr0686	AGF50661.1	1.32037	1.26248	49.979	28	65.991	44	63.0975	59
2543	rfbB_3	CP003265	2840982..2842010	1029	dTDP-glucose 4,6-dehydratase	similar to slr0836	AGF52810.1	1.32037	1.26248	17.4854	28	23.0872	44	22.0749	59
3514	MYO_3730	CP003269 (pSYSX_M)	68201..69757	1557	hypothetical protein	similar to slr6072	AGF53781.1	1.12032	1.2622	30.9531	0	34.6773	0	39.0689	0
2086	MYO_121140	CP003265	complement(2307800..2308258)	459	hypothetical protein	similar to sll0172	AGF52353.1	1.41514	1.26135	26.5995	19	37.6419	32	33.5513	40
2625	MYO_126630	CP003265	2930427..2931440	1014	hypothetical protein	similar to slr0521	AGF52892.1	1.19402	1.26135	12.0406	19	14.3767	27	15.1874	40
266	MYO_12700	CP003265	complement(293496..293669)	174	hypothetical protein	similar to ssl2384	AGF50533.1	1.59356	1.26027	107.098	29	170.666	55	134.972	61
3396	MYO_540	CP003268 (pSYSG_M)	complement(3660..3839)	180	hypothetical protein	similar to ssl8003	AGF53663.1	2.18462	1.2582	35.6993	10	77.9893	26	44.9169	21
219	bvdR	CP003265	243158..244144	987	biliverdin reductase	similar to slr1784	AGF50486.1	1.48442	1.2582	19.5315	30	28.993	53	24.5746	63
2947	MYO_129890	CP003265	3313206..3314003	798	hypothetical protein	similar to slr1464	AGF53214.1	1.26036	1.2582	8.05247	10	10.149	15	10.1316	21
877	MYO_18870	CP003265	complement(968142..968615)	474	hypothetical protein	similar to sll1715	AGF51144.1	0.588167	1.2582	13.5567	10	7.97359	7	17.057	21
2958	MYO_130040	CP003265	3328893..3330089	1197	hypothetical protein	similar to slr0656	AGF53225.1	1.27716	1.2582	26.8416	50	34.281	76	33.7721	105
695	MYO_17040	CP003265	complement(769789..770391)	603	hypothetical protein	similar to sll1916	AGF50962.1	1.09231	1.2582	10.6565	10	11.6402	13	13.408	21
277	MYO_12810	CP003265	305595..306824	1230	hypothetical protein	similar to slr1302	AGF50544.1	1.34181	1.25637	102.396	196	137.396	313	128.647	411
1525	MYO_115420	CP003265	1682966..1683160	195	hypothetical protein	similar to ssr1375	AGF51792.1	1.45426	1.2559	171.356	52	249.197	90	215.206	109
1669	petF_2	CP003265	complement(1830030..1830398)	369	ferredoxin	similar to sll1382	AGF51936.1	1.16324	1.25587	670.45	385	779.893	533	841.996	807
97	MYO_1970	CP003265	114319..114624	306	hypothetical protein	similar to slr0729	AGF50364.1	1.35372	1.25535	264.595	126	358.186	203	332.158	264
2323	accC	CP003265	complement(2595119..2596465)	1347	biotin carboxylase	similar to sll0053	AGF52590.1	1.10431	1.25535	50.0903	105	55.3154	138	62.8808	220
1481	MYO_114980	CP003265	1634215..1635171	957	D-isomer specific 2-hydroxyacid dehydrogenase family	similar to slr2123	AGF51748.1	1.01091	1.25446	42.9734	64	43.4423	77	53.9083	134
184	MYO_11860	CP003265	200405..202525	2121	hypothetical protein	similar to slr1103	AGF50451.1	1.35839	1.25421	90.8892	300	123.463	485	113.994	628
645	lig_2	CP003265	complement(713967..715655)	1689	DNA ligase	similar to sll1583	AGF50912.1	1.0312	1.25275	184.14	484	189.885	594	230.682	1012
89	llaI.2	CP003265	complement(105151..106539)	1389	putative endonuclease		AGF50356.1	1.47509	1.25154	20.8181	45	30.7085	79	26.0548	94
1147	MYO_111600	CP003265	complement(1270840..1271718)	879	hypothetical protein	similar to sll2002	AGF51414.1	0.963803	1.25115	24.8555	34	23.9558	39	31.098	71
2866	MYO_129050	CP003265	3217431..3218375	945	auxin-induced protein	similar to slr0545	AGF53133.1	1.31516	1.25039	15.6397	23	20.5686	36	19.5556	48
3542	MYO_31010	CP003269 (pSYSX_M)	93820..94140	321	hypothetical protein	similar to slr6100	AGF53809.1	1.34164	1.24915	4055.7	2026	5441.31	3235	5066.19	4224
44	hypD	CP003265	54533..55657	1125	hydrogenase isoenzymes formation protein HypD	similar to slr1498	AGF50311.1	1.239	1.24906	33.7001	59	41.7543	87	42.0935	123
2290	MYO_123250	CP003265	2560221..2561417	1197	hypothetical protein	similar to slr0049	AGF52557.1	1.28988	1.24849	198.627	370	256.206	568	247.984	771
1347	MYO_113620	CP003265	complement(1489152..1489832)	681	NarL subfamily	similar to sll1592	AGF51614.1	1.82052	1.24822	11.3231	12	20.6139	26	14.1337	25
1996	MYO_120220	CP003265	2209772..2210974	1203	D-alanyl-D-alanine carboxypeptidase	similar to slr1924	AGF52263.1	1.69448	1.24822	32.0492	60	54.3068	121	40.0043	125
1231	MYO_112450	CP003265	1358904..1360628	1725	ABC transporter	similar to slr0864	AGF51498.1	1.01529	1.24822	35.7614	96	36.3081	116	44.6379	200
2223	petF_4	CP003265	complement(2482157..2482450)	294	ferredoxin	similar to ssl0020	AGF52490.1	1.01824	1.24716	4983.33	2280	5074.2	2763	6215.03	4746
594	MYO_16030	CP003265	662844..663233	390	hypothetical protein	similar to slr1034	AGF50861.1	1.51572	1.24528	168.061	102	254.734	184	209.283	212
2335	MYO_123710	CP003265	2610175..2610585	411	hypothetical protein	similar to slr0476	AGF52602.1	1.42795	1.24521	858.346	549	1225.67	933	1068.82	1141
125	MYO_11250	CP003265	142981..143826	846	hypothetical protein	similar to slr0241	AGF50392.1	1.198	1.2451	194.447	256	232.947	365	242.105	532
2673	MYO_127120	CP003265	2989323..2989958	636	hypothetical protein	similar to slr0110	AGF52940.1	1.326	1.2451	64.6628	64	85.743	101	80.5114	133
3063	ppx	CP003265	complement(3459758..3461380)	1623	exopolyphosphatase	similar to sll1546	AGF53330.1	1.4142	1.2447	56.2214	142	79.5085	239	69.9787	295
1024	napC	CP003265	complement(1140152..1141315)	1164	carboxynorspermidine decarboxylase	similar to sll0873	AGF51291.1	1.80974	1.24438	7.17666	13	12.9879	28	8.93045	27
1752	MYO_117740	CP003265	1923468..1924412	945	hypothetical protein	similar to slr1162	AGF52019.1	0.969506	1.24438	17.6796	26	17.1405	30	22.0001	54
1211	phr_2	CP003265	1338126..1339592	1467	deoxyribopyrimidine photolyase	similar to slr0854	AGF51478.1	1.05666	1.24368	28.9098	66	30.548	83	35.9545	137
2642	cbiP	CP003265	2951774..2953357	1584	cobyric acid synthase	similar to slr0618	AGF52909.1	1.35258	1.24213	33.2652	82	44.9938	132	41.3196	170
4	MYO_140	CP003265	complement(2172..2873)	702	hypothetical protein	similar to sll0558	AGF50271.1	1.17633	1.24186	50.3451	55	59.2227	77	62.5216	114
843	secE	CP003265	complement(925968..926213)	246	secretory protein SecE	similar to ssl3335	AGF51110.1	1.088	1.2413	1018.74	390	1108.39	505	1264.56	808
3222	MYO_2630	CP003266 (pSYSM_M)	complement(65331..65786)	456	hypothetical protein	similar to sll5062	AGF53489.1	1.74049	1.24108	19.7285	14	34.3374	29	24.4848	29
1156	sppA_1	CP003265	complement(1279831..1281663)	1833	protease IV	similar to sll1703	AGF51423.1	1.33538	1.24108	19.6317	56	26.2157	89	24.3645	116
1740	MYO_117620	CP003265	complement(1912582..1913121)	540	hypothetical protein	similar to sll1102	AGF52007.1	1.17033	1.24108	33.3193	28	38.9947	39	41.352	58
2051	MYO_120790	CP003265	2268848..2272135	3288	CheA like protein	similar to slr0322	AGF52318.1	1.26552	1.24098	79.5416	407	100.661	613	98.7094	843
956	MYO_19670	CP003265	1052173..1052439	267	hypothetical protein	similar to ssr2062	AGF51223.1	1.22082	1.24058	409.138	170	499.482	247	507.568	352
2607	MYO_126450	CP003265	complement(2914265..2914732)	468	hypothetical protein	similar to sll0481	AGF52874.1	0.856633	1.2392	281.475	205	241.121	209	348.805	424
3025	MYO_130730	CP003265	complement(3409169..3410758)	1590	hypothetical protein	similar to sll0735	AGF53292.1	1.33674	1.23914	35.5646	88	47.5407	140	44.0694	182
1868	MYO_118900	CP003265	2047012..2047398	387	hypothetical protein		AGF52135.1	1.4004	1.23823	24.9065	15	34.879	25	30.8399	31
2504	ftrC	CP003265	complement(2801496..2801852)	357	ferredoxin-thioredoxin reductase, catalytic chain	similar to sll0554	AGF52771.1	1.14272	1.23823	134.997	75	154.265	102	167.158	155
3356	MYO_4670	CP003267 (pSYSA_M)	complement(61606..61920)	315	hypothetical protein	similar to sll7069	AGF53623.1	1.03629	1.23823	61.1987	30	63.4199	37	75.7781	62
3010	MYO_130580	CP003265	complement(3393030..3395528)	2499	hypothetical protein	similar to sll1477	AGF53277.1	1.21368	1.23823	11.5712	45	14.0437	65	14.3278	93
2279	MYO_123140	CP003265	complement(2548950..2549435)	486	hypothetical protein	similar to sll0406	AGF52546.1	1.17633	1.23823	39.6659	30	46.6603	42	49.1154	62
2433	MYO_124700	CP003265	complement(2717518..2717970)	453	hypothetical protein	similar to sll0189	AGF52700.1	0.650507	1.23694	43.9739	31	28.6054	24	54.3932	64
2301	ilvN	CP003265	complement(2572612..2573178)	567	acetolactate synthase	similar to sll0065	AGF52568.1	1.50184	1.23603	143.93	127	216.161	227	177.902	262
1155	csgA	CP003265	complement(1279037..1279807)	771	cell-cell signaling protein, C-factor	similar to sll1704	AGF51422.1	0.997783	1.23573	13.3351	16	13.3056	19	16.4787	33
3229	MYO_2700	CP003266 (pSYSM_M)	complement(69335..70810)	1476	hypothetical protein	similar to sll5069	AGF53496.1	1.07292	1.23516	28.2982	59	30.3617	78	34.9527	125
1986	pilT_2	CP003265	2200212..2201321	1110	twitching motility protein	similar to slr0161	AGF52253.1	1.2757	1.23476	332.872	575	424.645	873	411.015	1185
3287	MYO_21280	CP003266 (pSYSM_M)	114514..115284	771	hypothetical protein	similar to slr5127	AGF53554.1	1.27309	1.2346	27.5037	33	35.0147	50	33.9561	68
3148	MYO_131960	CP003265	3555290..3556270	981	hypothetical protein	similar to slr0600	AGF53415.1	1.46568	1.23433	87.1193	133	127.689	232	107.534	274
3231	MYO_2720	CP003266 (pSYSM_M)	71474..71818	345	hypothetical protein	similar to slr5071	AGF53498.1	0.808651	1.23433	247.722	133	200.32	128	305.769	274
1559	MYO_115770	CP003265	1711878..1714739	2862	cation-transporting ATPase E1-E2 ATPase	similar to slr0822	AGF51826.1	1.37329	1.23372	41.7614	186	57.3507	304	51.5219	383
2636	glk	CP003265	complement(2942338..2943405)	1068	glucokinase	similar to sll0593	AGF52903.1	1.3345	1.23353	51.1422	85	68.2491	135	63.0855	175
1134	murD	CP003265	complement(1255375..1256733)	1359	UDP-N-acetylmuramoylalanine--D-glutamate ligase	similar to sll2010	AGF51401.1	1.60634	1.23353	16.0765	34	25.8243	65	19.8308	70
1837	MYO_118590	CP003265	complement(2018818..2019504)	687	hypothetical protein	similar to sll0909	AGF52104.1	0.864951	1.23353	31.802	34	27.5072	35	39.2287	70
1846	maf	CP003265	complement(2026626..2027213)	588	maf protein	similar to sll0905	AGF52113.1	1.26036	1.23312	93.9838	86	118.453	129	115.893	177
1228	MYO_112420	CP003265	complement(1355020..1356096)	1077	hypothetical protein	similar to sll0844	AGF51495.1	1.13109	1.23285	62.0511	104	70.1854	140	76.4999	214
1336	MYO_113510	CP003265	1477457..1478251	795	hypothetical protein	similar to slr1724	AGF51603.1	1.19758	1.23272	70.3208	87	84.2149	124	86.6859	179
2687	minD	CP003265	complement(3004899..3005699)	801	septum site-determining protein MinD	similar to sll0289	AGF52954.1	1.40829	1.23204	56.9584	71	80.2138	119	70.1751	146
3020	leuC	CP003265	complement(3402507..3403913)	1407	3-isopropylmalate dehydratase	similar to sll1470	AGF53287.1	1.09596	1.23178	73.5298	161	80.586	210	90.5725	331
1209	MYO_112230	CP003265	1337197..1337625	429	hypothetical protein	similar to slr0852	AGF51476.1	0.933598	1.23157	80.8851	54	75.5142	60	99.6158	111
1799	MYO_118210	CP003265	1974488..1975189	702	hypothetical protein	similar to slr1687	AGF52066.1	1.15674	1.23053	204.127	223	236.122	307	251.183	458
275	MYO_12790	CP003265	303424..303621	198	hypothetical protein	similar to ssr2153	AGF50542.1	1.14658	1.23014	14954.7	4608	17146.7	6288	18396.5	9461
846	MYO_18560	CP003265	927614..928405	792	hypothetical protein	similar to slr1827	AGF51113.1	1.01713	1.22982	15.4156	19	15.6797	23	18.9584	39
2772	polA	CP003265	3101410..3104370	2961	DNA polymerase I	similar to slr0707	AGF53039.1	0.707569	1.22982	8.24664	38	5.83507	32	10.1419	78
2016	MYO_120420	CP003265	complement(2231076..2231540)	465	hypothetical protein	similar to sll1853	AGF52283.1	1.19402	1.22982	26.2562	19	31.3506	27	32.2905	39
2663	MYO_127010	CP003265	2977164..2977868	705	hypothetical protein	similar to slr0106	AGF52930.1	1.17633	1.22824	54.6882	60	64.3316	84	67.1705	123
2403	napA	CP003265	2682227..2684323	2097	Na(+)/H(+) antiporter	similar to slr0415	AGF52670.1	1.13432	1.22824	18.3859	60	20.8555	81	22.5824	123
3226	MYO_2670	CP003266 (pSYSM_M)	complement(67362..67976)	615	hypothetical protein	similar to sll5066	AGF53493.1	1.09231	1.22824	20.8971	20	22.8261	26	25.6668	41
267	pfkA_1	CP003265	complement(293878..294963)	1086	phosphofructokinase	similar to sll1196	AGF50534.1	1.74272	1.22787	47.9277	81	83.5245	168	58.8492	166
85	me	CP003265	99402..100793	1392	malic enzyme	similar to slr0721	AGF50352.1	1.12032	1.22682	58.1652	126	65.1635	168	71.3581	258
49	MYO_1490	CP003265	59746..60423	678	hypothetical protein	similar to slr1501	AGF50316.1	0.800698	1.22648	80.5603	85	64.5045	81	98.8058	174
3013	MYO_130610	CP003265	complement(3396724..3397590)	867	sensory transduction histidine kinase	similar to sll1475	AGF53280.1	1.60232	1.22615	31.8699	43	51.0657	82	39.0775	88
2817	MYO_128560	CP003265	3155002..3155316	315	hypothetical protein	similar to slr0033	AGF53084.1	1.35921	1.22472	138.717	68	188.546	110	169.89	139
869	ccmK_3	CP003265	955930..956268	339	carbon dioxide concentrating mechanism protein CcmK	similar to slr1839	AGF51136.1	1.25781	1.22371	312.763	165	393.398	247	382.73	337
2511	MYO_125490	CP003265	complement(2808896..2809558)	663	hypothetical protein	similar to sll0547	AGF52778.1	1.27762	1.22291	70.7524	73	90.3949	111	86.5238	149
2670	MYO_127090	CP003265	complement(2984531..2985877)	1347	hypothetical protein	similar to sll0096	AGF52937.1	1.21749	1.22274	23.3755	49	28.4594	71	28.5822	100
2179	rnc_2	CP003265	2428971..2429705	735	ribonuclease III	similar to slr0346	AGF52446.1	1.24355	1.22225	21.8567	25	27.18	37	26.7144	51
1010	cdsA	CP003265	1120298..1121179	882	phosphatidate cytidylyltransferase	similar to slr1369	AGF51277.1	1.42888	1.22198	128.954	177	184.261	301	157.58	361
1366	MYO_113810	CP003265	complement(1513820..1514071)	252	hypothetical protein	similar to ssl0461	AGF51633.1	1.51572	1.22178	130.047	51	197.116	92	158.89	104
3481	MYO_3400	CP003269 (pSYSX_M)	34784..35374	591	hypothetical protein	similar to slr6039	AGF53748.1	1.97133	1.22133	56.5389	20	111.457	50	69.0528	35
2554	ycf34	CP003265	2854775..2855023	249	Ycf34	similar to ssr1425	AGF52821.1	1.43152	1.22048	209.034	81	299.236	138	255.122	165
201	MYO_12030	CP003265	223018..223596	579	hypothetical protein	similar to slr1110	AGF50468.1	0.995838	1.22048	29.9652	27	29.8405	32	36.5718	55
408	MYO_14150	CP003265	446909..447796	888	hypothetical protein	similar to slr1590	AGF50675.1	1.48487	1.22048	136.767	189	203.08	334	166.921	385
1645	MYO_116640	CP003265	1809599..1809970	372	CheY subfamily	similar to slr1982	AGF51912.1	1.01443	1.22021	141.645	82	143.69	99	172.837	167
2240	MYO_122750	CP003265	2506429..2506851	423	hypothetical protein	similar to slr0217	AGF52507.1	1.23035	1.21969	255.212	168	314	246	311.278	342
2814	MYO_128530	CP003265	complement(3150720..3151928)	1209	PatA subfamily	similar to sll0038	AGF53081.1	1.14823	1.21961	149.352	281	171.49	384	182.151	572
1444	MYO_114600	CP003265	complement(1601906..1602628)	723	hypothetical protein	similar to sll1414	AGF51711.1	1.05587	1.2195	100.432	113	106.044	142	122.476	230
1971	MYO_119970	CP003265	2177341..2177811	471	hypothetical protein	similar to slr0149	AGF52238.1	1.37877	1.21911	353.355	259	487.195	425	430.777	527
2085	MYO_121130	CP003265	complement(2306680..2307738)	1059	virginiamycin B hydrolase Vgb	similar to sll0173	AGF52352.1	1.30382	1.21895	35.1936	58	45.8861	90	42.8992	118
2273	MYO_123080	CP003265	complement(2543795..2544295)	501	hypothetical protein	similar to sll0410	AGF52540.1	0.811265	1.21895	37.1956	29	30.1755	28	45.3395	59
824	MYO_18330	CP003265	907645..907968	324	hypothetical protein	similar to slr2071	AGF51091.1	1.14833	1.21826	59.4988	30	68.324	41	72.4849	61
682	MYO_16910	CP003265	752928..754235	1308	hypothetical protein	similar to slr2013	AGF50949.1	1.27391	1.21761	30.459	62	38.802	94	37.0873	126
445	cbiA	CP003265	complement(484901..486349)	1449	cobyrinic acid a,c-diamide synthase	similar to sll1501	AGF50712.1	0.813134	1.21761	13.7475	31	11.1786	30	16.7392	63
3153	lepA	CP003265	3560929..3562740	1812	LepA	similar to slr0604	AGF53420.1	1.10141	1.21642	304.626	859	335.517	1126	370.554	1744
2254	MYO_122890	CP003265	2523900..2525348	1449	hypothetical protein	similar to slr0226	AGF52521.1	1.31705	1.21591	256.325	578	337.594	906	311.668	1173
2118	gabD	CP003265	2366551..2367915	1365	succinate-semialdehyde dehydrogenase (NADP+)	similar to slr0370	AGF52385.1	1.30114	1.21587	208.546	443	271.348	686	253.565	899
400	MYO_14060	CP003265	437807..438010	204	hypothetical protein	similar to ssr1155	AGF50667.1	0.913657	1.21574	324.443	103	296.43	112	394.438	209
3057	murG	CP003265	3454373..3455488	1116	UDP-N-acetylglucosamine-N-acetylmuramyl- (pentapeptide)pyrophosphoryl-undecaprenol N-acetylglucosamine transferase	similar to slr1656	AGF53324.1	1.01072	1.21565	39.7298	69	40.1558	83	48.2977	140
1815	MYO_118370	CP003265	1996462..1996920	459	hypothetical protein	similar to slr0935	AGF52082.1	1.21894	1.21516	99.398	71	121.16	103	120.785	144
3383	MYO_4940	CP003267 (pSYSA_M)	91640..92053	414	hypothetical protein	similar to slr7096	AGF53650.1	1.07364	1.21493	55.8771	36	59.9918	46	67.8868	73
2325	MYO_123610	CP003265	complement(2597280..2597759)	480	hypothetical protein	similar to sll0051	AGF52592.1	1.29442	1.21448	346.729	259	448.814	399	421.096	525
2043	lrtA	CP003265	complement(2260072..2260647)	576	light repressed protein	similar to sll0947	AGF52310.1	1.22828	1.2141	1183.65	1061	1453.86	1551	1437.07	2150
2522	MYO_125600	CP003265	2816591..2817145	555	hypothetical protein	similar to slr0575	AGF52789.1	1.48147	1.21405	43.9969	38	65.1803	67	53.4147	77
1852	ppa	CP003265	2032571..2033272	702	inorganic pyrophosphatase	similar to slr1622	AGF52119.1	1.05848	1.21385	70.4832	77	74.6052	97	85.5559	156
318	MYO_13240	CP003265	349468..350298	831	ABC transporter	similar to slr0977	AGF50585.1	1.38039	1.21255	32.4773	42	44.8314	69	39.3804	85
1229	MYO_112430	CP003265	complement(1356210..1357307)	1098	hypothetical protein	similar to sll0843	AGF51496.1	1.32875	1.21222	25.1651	43	33.4381	68	30.5056	87
2583	hisH	CP003265	2887834..2888466	633	N-acetyl-glutamate-gamma-semialdehyde dehydrogenase	similar to slr0084	AGF52850.1	1.03564	1.21222	43.6512	43	45.2071	53	52.9149	87
780	MYO_17890	CP003265	849457..850200	744	hypothetical protein	similar to slr1900	AGF51047.1	1.00574	1.2119	114.007	132	114.662	158	138.166	267
902	MYO_19130	CP003265	complement(993191..993868)	678	hypothetical protein	similar to sll1459	AGF51169.1	0.954817	1.2119	41.7018	44	39.8176	50	50.5386	89
3104	agp	CP003265	3512630..3513949	1320	ADP-glucose pyrophosphorylase	similar to slr1176	AGF53371.1	1.08585	1.20882	221.498	455	240.513	588	267.751	918
1363	MYO_113780	CP003265	1510485..1511594	1110	hypothetical protein	similar to slr0264	AGF51630.1	1.36177	1.20862	33.5766	58	45.7235	94	40.5813	117
1112	thrB	CP003265	complement(1233606..1234526)	921	homoserine kinase	similar to sll1760	AGF51379.1	1.02229	1.20827	41.8623	60	42.7955	73	50.5811	121
3065	gst1	CP003265	complement(3463972..3464787)	816	glutathione S-transferase	similar to sll1545	AGF53332.1	1.24763	1.20736	51.9739	66	64.8441	98	62.7515	133
563	MYO_15700	CP003265	619120..619971	852	esterase	similar to slr1916	AGF50830.1	1.22217	1.20736	99.5557	132	121.674	192	120.2	266
385	hisD_1	CP003265	420604..421833	1230	histidinol dehydrogenase	similar to slr0682	AGF50652.1	0.886279	1.20649	38.1373	73	33.8003	77	46.0124	147
771	rpl3	CP003265	complement(841627..842268)	642	50S ribosomal protein L3	similar to sll1799	AGF51038.1	1.32265	1.20539	843.771	843	1116.02	1327	1017.08	1696
692	MYO_17010	CP003265	767391..767933	543	CheY subfamily	similar to slr2024	AGF50959.1	1.45641	1.20399	124.257	105	180.97	182	149.605	211
770	rpl4	CP003265	complement(840955..841587)	633	50S ribosomal protein L4	similar to sll1800	AGF51037.1	1.22168	1.20399	639.541	630	781.315	916	770.003	1266
2941	apcF	CP003265	3302140..3302649	510	phycobilisome core component	similar to slr1459	AGF53208.1	1.17072	1.20177	868.122	689	1016.33	960	1043.28	1382
2724	MYO_127630	CP003265	3049040..3052204	3165	cation or drug efflux system protein	similar to slr0794	AGF52991.1	1.44349	1.19829	7.91813	39	11.4297	67	9.48819	78
137	MYO_11380	CP003265	153622..153996	375	hypothetical protein	similar to slr0249	AGF50404.1	1.4074	1.19829	68.5426	40	96.4668	67	82.1337	80
2711	MYO_127500	CP003265	3037126..3037989	864	hypothetical protein	similar to slr0317	AGF52978.1	1.4004	1.19829	8.92482	12	12.4983	20	10.6945	24
1142	MYO_111550	CP003265	complement(1266163..1266420)	258	hypothetical protein	similar to ssl3829	AGF51409.1	0.896254	1.19829	37.3597	15	33.4838	16	44.7676	30
1792	MYO_118140	CP003265	1969050..1969457	408	transposase	similar to slr1682	AGF52059.1	2.52072	1.19829	4.7249	2	11.9101	7	5.66179	5
2797	MYO_128360	CP003265	complement(3125132..3125581)	450	hypothetical protein	similar to sll0742	AGF53064.1	2.1006	1.19829	19.9916	14	41.9943	35	23.9557	28
3337	MYO_4480	CP003267 (pSYSA_M)	complement(40654..41247)	594	hypothetical protein	similar to sll7050	AGF53604.1	1.8672	1.19829	9.73616	9	18.1793	20	11.6667	18
2709	MYO_127480	CP003265	3034578..3035312	735	hypothetical protein	similar to slr0315	AGF52976.1	1.78551	1.19829	6.99414	8	12.4881	17	8.38099	16
630	MYO_16390	CP003265	698225..698464	240	hypothetical protein	similar to ssr2333	AGF50897.1	1.68048	1.19829	5.35489	2	8.99877	4	6.4167	4
1342	MYO_113570	CP003265	complement(1482681..1483007)	327	hypothetical protein	similar to sll1596	AGF51609.1	1.68048	1.19829	17.6859	9	29.7207	18	21.1928	18
3048	MYO_130960	CP003265	complement(3443806..3444249)	444	apxIC hemolysin activation protein	similar to sll0720	AGF53315.1	1.68048	1.19829	1.44727	1	2.4321	2	1.73424	2
344	MYO_13500	CP003265	373654..374511	858	hypothetical protein	similar to slr1070	AGF50611.1	1.64816	1.19829	19.4723	26	32.0935	51	23.3334	52
2787	petM	CP003265	3115460..3115570	111	cytochrome b6-f complex subunit PetM	similar to smr0003	AGF53054.1	1.64047	1.19829	121.57	21	199.432	41	145.676	42
2039	MYO_120660	CP003265	2254470..2255231	762	hypothetical protein	similar to slr0989	AGF52306.1	1.62796	1.19829	13.4926	16	21.9655	31	16.1681	32
2913	MYO_129540	CP003265	3270961..3271284	324	hypothetical protein	similar to slr1421	AGF53180.1	1.61584	1.19829	25.7828	13	41.661	25	30.8952	26
424	ycf20	CP003265	complement(465334..465663)	330	YCF20 protein	similar to sll1509	AGF50691.1	1.58712	1.19829	17.5251	9	27.8144	17	21.0001	18
48	MYO_1480	CP003265	complement(59039..59650)	612	hypothetical protein	similar to sll1392	AGF50315.1	1.57545	1.19829	16.7997	16	26.467	30	20.1308	32
3224	MYO_2650	CP003266 (pSYSM_M)	complement(66782..67072)	291	hypothetical protein	similar to ssl5064	AGF53491.1	1.51243	1.19829	22.082	10	33.3975	18	26.4606	20
224	MYO_12260	CP003265	247619..248713	1095	hypothetical protein	similar to slr1787	AGF50491.1	1.46442	1.19829	20.5393	35	30.0781	61	24.612	70
1391	tyrA	CP003265	1538146..1538985	840	prephenate dehydrogenase	similar to slr2081	AGF51658.1	1.45132	1.19829	16.8297	22	24.4252	38	20.1668	44
2975	MYO_130220	CP003265	3350464..3351000	537	hypothetical protein	similar to slr0668	AGF53242.1	1.4004	1.19829	3.58987	3	5.02725	5	4.3017	6
3179	MYO_2200	CP003266 (pSYSM_M)	23890..24099	210	hypothetical protein	similar to ssr5019	AGF53446.1	1.4004	1.19829	9.17981	3	12.8554	5	11	6
3317	MYO_4280	CP003267 (pSYSA_M)	complement(26451..26954)	504	hypothetical protein	similar to sll7030	AGF53584.1	1.4004	1.19829	11.4748	9	16.0692	15	13.7501	18
3266	MYO_21070	CP003266 (pSYSM_M)	99216..99449	234	hypothetical protein	similar to ssr5106	AGF53533.1	1.36539	1.19829	21.9688	8	29.9959	12	26.3249	16
1150	MYO_111630	CP003265	complement(1273842..1274627)	786	transposase	similar to sll1710	AGF51417.1	1.36539	1.19829	6.54032	6	8.93008	11	7.83719	11
3150	MYO_131980	CP003265	3556846..3557235	390	hypothetical protein	similar to slr0602	AGF53417.1	1.34947	1.19829	54.3727	33	73.3746	53	65.1541	66
173	folK	CP003265	189128..189715	588	7,8-dihydro-6-hydroxymethylpterin- pyrophosphokinase	similar to slr1093	AGF50440.1	1.34788	1.19829	52.4561	48	70.7046	77	62.8574	96
3096	truB	CP003265	3504202..3505092	891	tRNA pseudouridine 55 synthase	similar to slr0457	AGF53363.1	1.3345	1.19829	12.2604	17	16.3614	27	14.6914	34
3037	MYO_130850	CP003265	3423847..3424104	258	hypothetical protein	similar to ssr1256	AGF53304.1	1.32669	1.19829	47.3223	19	62.7821	30	56.7057	38
2794	pfkA_2	CP003265	complement(3122313..3123467)	1155	phosphofructokinase	similar to sll0745	AGF53061.1	1.29855	1.19829	18.3596	33	23.8409	51	22.0001	66
94	MYO_1940	CP003265	110808..111224	417	hypothetical protein	similar to slr0725	AGF50361.1	1.26036	1.19829	3.08195	2	3.88436	3	3.69306	4
2189	MYO_122180	CP003265	complement(2440728..2441126)	399	transposase	similar to sll0317	AGF52456.1	1.26036	1.19829	3.22099	1	4.0596	1	3.85967	2
1563	MYO_115810	CP003265	complement(1717289..1717732)	444	hypothetical protein	similar to sll0802	AGF51830.1	1.23564	1.19829	49.2071	34	60.8025	50	58.9642	68
1684	petC_2	CP003265	complement(1846770..1847171)	402	cytochrome b6/f complex iron-sulfur subunit	similar to sll1182	AGF51951.1	1.2341	1.19829	51.1512	32	63.1257	47	61.2938	64
222	malQ	CP003265	complement(245502..247019)	1518	4-alpha-glucanotransferase	similar to sll1676	AGF50489.1	1.23011	1.19829	52.9139	125	65.0899	183	63.4061	250
2603	MYO_126410	CP003265	2910379..2911392	1014	hypothetical protein	similar to slr0503	AGF52870.1	1.22493	1.19829	105.197	166	128.858	242	126.056	332
3157	hisI	CP003265	3565718..3566410	693	phosphoribosyl-ATP pyrophosphohydrolase:phosphoribosyl-AMP cyclohydrolase	similar to slr0608	AGF53424.1	1.17633	1.19829	46.3627	50	54.538	70	55.5558	100
2572	MYO_126100	CP003265	complement(2875346..2876557)	1212	hypothetical protein	similar to sll0085	AGF52839.1	1.167	1.19829	19.0867	36	22.2742	50	22.8714	72
2694	MYO_127330	CP003265	3014451..3015419	969	hypothetical protein	similar to slr0303	AGF52961.1	1.16033	1.19829	13.926	21	16.1588	29	16.6874	42
3170	MYO_2110	CP003266 (pSYSM_M)	16603..17166	564	hypothetical protein	similar to slr5010	AGF53437.1	1.15533	1.19829	18.2294	9	21.061	17	21.8441	25
38	MYO_1380	CP003265	complement(48405..48635)	231	hypothetical protein	similar to ssl2733	AGF50305.1	1.08737	1.19829	47.2899	17	51.4215	22	56.6669	34
1026	MYO_110390	CP003265	1141756..1142067	312	hypothetical protein	similar to slr0881	AGF51293.1	1.06219	1.19829	109.157	53	115.946	67	130.802	106
1710	MYO_117320	CP003265	complement(1878452..1879168)	717	hypothetical protein	similar to sll1169	AGF51977.1	1.0503	1.19829	3.58486	4	3.76518	5	4.2957	8
2209	MYO_122420	CP003265	complement(2466512..2467696)	1185	hypothetical protein	similar to sll0019	AGF52476.1	1.0503	1.19829	49.8886	92	52.3979	115	59.7809	184
1700	MYO_117220	CP003265	complement(1869480..1870304)	825	hypothetical protein	similar to sll1174	AGF51967.1	1.03414	1.19829	10.1256	13	10.4713	16	12.1334	26
2498	pth	CP003265	2794690..2795274	585	peptidyl-tRNA hydrolase	similar to slr0922	AGF52765.1	1.02356	1.19829	60.4141	55	61.8377	67	72.3935	110
1489	aroB	CP003265	1642151..1643236	1086	3-dehydroquinate synthase	similar to slr2130	AGF51756.1	1.02029	1.19829	33.1352	56	33.8075	68	39.7055	112
3388	MYO_4990	CP003267 (pSYSA_M)	95915..96457	543	hypothetical protein	similar to slr7101	AGF53655.1	1.01713	1.19829	44.9692	38	45.7396	46	53.8861	76
456	MYO_14630	CP003265	complement(501280..502092)	813	hypothetical protein	similar to sll1011	AGF50723.1	1.00829	1.19829	11.8558	15	11.9541	18	14.2067	30
1554	MYO_115720	CP003265	1707701..1709137	1437	glucosyltransferase	similar to slr0820	AGF51821.1	0.921552	1.19829	13.8623	31	12.7749	34	16.6111	62
1993	MYO_120190	CP003265	2207718..2207972	255	transposase	similar to ssr0256	AGF52260.1	0.840239	1.19829	2.51995	0	2.11736	0	3.01962	0
1368	isiB	CP003265	complement(1515128..1515640)	513	flavodoxin	similar to sll0248	AGF51635.1	0.840239	1.19829	2.50521	2	2.10498	2	3.00196	4
2464	MYO_125010	CP003265	2752118..2752354	237	hypothetical protein	similar to ssr0336	AGF52731.1	0.840239	1.19829	29.8247	11	25.0599	11	35.7386	22
1562	MYO_115800	CP003265	complement(1716779..1717258)	480	hypothetical protein	similar to sll0803	AGF51829.1	0.800227	1.19829	28.1132	21	22.4969	20	33.6877	42
3185	MYO_2260	CP003266 (pSYSM_M)	complement(27859..28053)	195	hypothetical protein	similar to ssl5025	AGF53452.1	0.796015	1.19829	62.611	19	49.8393	18	75.026	38
2826	cmpR	CP003265	complement(3165155..3166069)	915	CmpR	similar to sll0030; transcription regulator required for expressionof the cmp operon	AGF53093.1	0.746879	1.19829	6.32053	9	4.72067	8	7.5738	18
562	MYO_15690	CP003265	618717..619031	315	hypothetical protein	similar to slr1915	AGF50829.1	0.714203	1.19829	81.5983	40	58.2777	34	97.7782	80
298	MYO_13030	CP003265	complement(329222..329521)	300	hypothetical protein	similar to ssl1792	AGF50565.1	0.560159	1.19829	6.42587	3	3.59951	2	7.70003	6
2777	MYO_128160	CP003265	complement(3107484..3107828)	345	transposase	similar to sll0665	AGF53044.1	0.560159	1.19829	5.58771	2	3.13001	1	6.69568	4
3175	MYO_2160	CP003266 (pSYSM_M)	complement(21479..21760)	282	hypothetical protein	similar to ssl5015	AGF53442.1	0	1.19829	2.27868	1	0	0	2.73051	2
1254	MYO_112680	CP003265	complement(1384224..1384640)	417	transposase	similar to sll1157	AGF51521.1	3.50099	1.19829	9.24585	5	32.3697	20	11.0792	12
433	MYO_14400	CP003265	473516..473764	249	transposase	similar to ssr2699	AGF50700.1	2.52072	1.19829	2.58067	1	6.50513	2	3.09238	2
3307	MYO_4180	CP003267 (pSYSA_M)	15813..16097	285	hypothetical protein	similar to ssr7017	AGF53574.1	2.1006	1.19829	4.50938	2	9.47239	5	5.40353	4
3508	MYO_3670	CP003269 (pSYSX_M)	61115..62188	1074	hypothetical protein	similar to slr6066	AGF53775.1	1.80051	1.19829	4.18818	0	7.54087	0	5.01864	0
3444	MYO_330	CP003269 (pSYSX_M)	3505..3753	249	hypothetical protein	similar to ssr6002	AGF53711.1	1.68048	1.19829	2.58067	1	4.33676	2	3.09238	1
1758	MYO_117800	CP003265	complement(1931937..1932323)	387	hypothetical protein	similar to sll1092	AGF52025.1	1.26036	1.19829	16.6043	10	20.9274	15	19.8967	20
1930	rps16	CP003265	2125147..2125395	249	30S ribosomal protein S16	similar to ssr0482	AGF52197.1	1.09972	1.19829	350.971	136	385.971	178	420.564	272
1998	prfB	CP003265	complement(2211952..2212818)	867	peptide chain release factor	similar to sll1865	AGF52265.1	0.869212	1.19829	21.4937	29	18.6826	30	25.7556	58
1664	MYO_116840	CP003265	1825726..1826121	396	hypothetical protein	similar to slr1470	AGF51931.1	1.30193	1.19673	623.114	384	811.253	595	745.698	767
2093	MYO_121210	CP003265	complement(2316822..2321903)	5082	beta transducin-like protein	similar to sll0163	AGF52360.1	1.1317	1.19666	46.6577	369	52.8027	497	55.8336	737
976	MYO_19870	CP003265	1077410..1078267	858	hypothetical protein	similar to slr1442	AGF51243.1	1.00649	1.19508	140.051	187	140.96	224	167.373	373
820	aroQ	CP003265	complement(902803..903261)	459	carbonic 3-dehydroquinase	similar to sll1112	AGF51087.1	1.62696	1.19447	219.795	157	357.598	304	262.539	313
6	MYO_160	CP003265	complement(4451..5389)	939	hypothetical protein	similar to sll1213	AGF50273.1	1.25043	1.19357	86.91	127	108.675	189	103.733	253
2719	MYO_127580	CP003265	3044982..3045539	558	hypothetical protein	similar to slr0789	AGF52986.1	1.11208	1.19241	117.462	102	130.627	135	140.063	203
133	ppiB	CP003265	complement(148943..149683)	741	peptidyl-prolyl cis-trans isomerase B	similar to sll0227	AGF50400.1	1.23564	1.19241	88.4532	102	109.297	150	105.473	203
2881	MYO_129220	CP003265	3232698..3232949	252	hypothetical protein	similar to ssr1562	AGF53148.1	0.884317	1.19239	777.734	305	687.763	321	927.365	607
138	MYO_11390	CP003265	154143..154679	537	hypothetical protein	similar to slr0250	AGF50405.1	1.14	1.19181	221.375	185	252.368	251	263.837	368
96	MYO_1960	CP003265	113025..114188	1164	hypothetical protein	similar to slr0728	AGF50363.1	0.998544	1.1896	38.0915	69	38.036	82	45.3138	137
931	pknA_1	CP003265	1027499..1028986	1488	protein kinase PknA	similar to slr1225	AGF51198.1	1.23564	1.18948	29.3655	68	36.2854	100	34.9296	135
3084	MYO_131320	CP003265	complement(3487603..3488106)	504	hypothetical protein	similar to sll0444	AGF53351.1	1.03794	1.18948	86.6982	68	89.9877	84	103.125	135
2534	rps18	CP003265	2828668..2828883	216	30S ribosomal protein S18	similar to ssr1399	AGF52801.1	1.11614	1.18934	398.642	134	444.939	178	474.122	266
1166	MYO_111790	CP003265	1290101..1290562	462	hypothetical protein	similar to slr1813	AGF51433.1	1.24097	1.18907	90.4072	65	112.192	96	107.5	129
1446	MYO_114620	CP003265	1603332..1604756	1425	hypothetical protein	similar to slr1515	AGF51713.1	1.12715	1.18854	55.4654	123	62.5178	165	65.9231	244
3242	MYO_2830	CP003266 (pSYSM_M)	80783..81613	831	hypothetical protein	similar to slr5082	AGF53509.1	1.27484	1.18796	44.8496	49	57.1763	84	53.2794	102
1328	fabZ	CP003265	complement(1468316..1468816)	501	(3R)-hydroxymyristol acyl carrier protein dehydrase	similar to sll1605	AGF51595.1	1.0653	1.18759	71.8261	56	76.5165	71	85.2998	111
617	MYO_16260	CP003265	681209..682177	969	hypothetical protein	similar to slr1385	AGF50884.1	1.23744	1.18739	36.4729	55	45.1331	81	43.3077	109
777	srrA	CP003265	846164..847465	1302	SrrA	similar to slr1897	AGF51044.1	0.994411	1.18729	53.7957	109	53.495	129	63.8713	216
1114	MYO_111270	CP003265	complement(1236013..1237458)	1446	hypothetical protein	similar to sll1758	AGF51381.1	1.27507	1.18663	114.208	257	145.623	390	135.523	509
2835	rbpA	CP003265	complement(3178976..3179281)	306	RNA binding protein	similar to sll0517	AGF53102.1	0.795505	1.18655	4181.01	1991	3326.02	1885	4960.99	3943
2650	ycf36	CP003265	complement(2959974..2960495)	522	YCF36 protein	similar to sll0584	AGF52917.1	1.46202	1.1863	61.5505	50	89.9877	87	73.0176	99
187	MYO_11890	CP003265	complement(206863..208338)	1476	hypothetical protein	similar to sll1037	AGF50454.1	1.19314	1.1863	21.7678	50	25.9721	71	25.8233	99
2523	acs	CP003265	complement(2817162..2819123)	1962	acetyl-coenzyme A synthetase	similar to sll0542	AGF52790.1	1.07868	1.18614	48.4724	148	52.2864	190	57.4952	293
2199	hisS_1	CP003265	2454202..2455545	1344	histidyl-tRNA synthetase	similar to slr0357	AGF52466.1	1.02886	1.18606	23.4276	48	24.1038	60	27.7866	97
3368	MYO_4790	CP003267 (pSYSA_M)	73646..75034	1389	hypothetical protein	similar to slr7081	AGF53635.1	1.10759	1.18467	40.711	88	45.091	116	48.2292	174
894	MYO_19040	CP003265	984217..984855	639	hypothetical protein	similar to slr1546	AGF51161.1	1.20445	1.18462	528.953	526	637.096	754	626.607	1040
2412	MYO_124490	CP003265	2692888..2693043	156	hypothetical protein	similar to ssr0692	AGF52679.1	0.603221	1.18458	9725.3	2361	5866.51	1695	11520.4	4668
1683	MYO_117050	CP003265	complement(1845418..1846710)	1293	hypothetical protein	similar to sll1369	AGF51950.1	0.859779	1.18435	21.3699	43	18.3734	44	25.3095	85
2495	citH	CP003265	complement(2792694..2793668)	975	2-ketoacid dehydrogenase malate dehydrogenase lactate dehydrogenase	similar to sll0891	AGF52762.1	1.15533	1.18408	305.805	464	353.306	638	362.099	917
1889	MYO_119120	CP003265	complement(2073815..2075608)	1794	hypothetical protein	similar to sll1521	AGF52156.1	0.967955	1.18391	44.7733	125	43.3386	144	53.0075	247
227	MYO_12290	CP003265	complement(251758..253116)	1359	regulatory components of sensory transduction system	similar to sll1673	AGF50494.1	1.02929	1.18331	18.9135	40	19.4675	49	22.3805	79
2512	MYO_125500	CP003265	complement(2809653..2809988)	336	hypothetical protein	similar to sll0546	AGF52779.1	1.53344	1.18331	76.4984	40	117.305	73	90.5212	79
2803	MYO_128420	CP003265	complement(3136185..3137123)	939	hypothetical protein	similar to sll0048	AGF53070.1	1.16788	1.18321	108.809	159	127.075	221	128.744	314
200	ank	CP003265	221742..223067	1326	erythroid ankyrin	similar to slr1109	AGF50467.1	1.25504	1.18312	38.2838	79	48.0477	118	45.2943	156
940	MYO_19510	CP003265	1039747..1040010	264	hypothetical protein	similar to ssr2047	AGF51207.1	1.44349	1.18292	94.9276	39	137.027	67	112.292	77
67	trx	CP003265	complement(77494..77874)	381	thioredoxin M	similar to sll1057	AGF50334.1	1.57829	1.18209	124.807	74	196.981	139	147.533	146
2322	MYO_123580	CP003265	2594055..2595116	1062	putative ATPase	similar to slr0067	AGF52589.1	1.13018	1.18141	85.9203	142	97.1054	191	101.507	280
1619	MYO_116380	CP003265	1778555..1778767	213	hypothetical protein	similar to ssr3341	AGF51886.1	1.23635	1.18117	211.179	70	261.091	103	249.438	138
1978	MYO_120040	CP003265	complement(2188201..2189319)	1119	high-affinity branched-chain amino acid transport protein BraE	similar to sll0146	AGF52245.1	1.29171	1.1804	38.4748	67	49.6983	103	45.4158	132
595	MYO_16040	CP003265	663290..663817	528	hypothetical protein	similar to slr1035	AGF50862.1	1.75686	1.18013	40.1617	33	70.5585	69	47.396	65
32	fecB_2	CP003265	42405..43397	993	iron(III) dicitrate-binding periplasmic protein	similar to slr1491	AGF50299.1	1.60409	1.18013	21.3548	33	34.2551	63	25.2015	65
733	fabF_1	CP003265	complement(819757..821007)	1251	beta ketoacyl-acyl carrier protein synthase	similar to sll1069	AGF51000.1	0.968101	1.17968	165.398	322	160.122	371	195.117	634
1291	MYO_113060	CP003265	1419410..1420612	1203	transposase	similar to slr2062	AGF51558.1	1.19075	1.17967	361.088	676	429.966	958	425.966	1331
166	MYO_11670	CP003265	181073..182221	1149	hypothetical protein	similar to slr1415	AGF50433.1	1.28662	1.17956	17.8962	32	23.0256	49	21.1098	63
2528	MYO_125660	CP003265	2822599..2822979	381	hypothetical protein	similar to slr0582	AGF52795.1	0.68872	1.17864	102.881	61	70.8565	50	121.26	120
3485	MYO_3440	CP003269 (pSYSX_M)	39171..42311	3141	hypothetical protein	similar to slr6043	AGF53752.1	0.728207	1.17832	6.13741	30	4.4693	26	7.23181	59
1876	clpB_1	CP003265	2060173..2062791	2619	ClpB protein	similar to slr1641	AGF52143.1	1.26508	1.17809	21.8367	89	27.6251	134	25.7256	175
2004	MYO_120300	CP003265	2219583..2220143	561	hypothetical protein	similar to slr1930	AGF52271.1	0.825997	1.17798	67.5804	59	55.8212	58	79.6082	116
1607	MYO_116260	CP003265	1762195..1763307	1113	hypothetical protein	similar to slr1962	AGF51874.1	1.30382	1.17763	16.7431	29	21.8299	45	19.7171	57
2640	MYO_126780	CP003265	2948367..2949722	1356	hypothetical protein	similar to slr0617	AGF52907.1	1.2169	1.17763	27.4853	58	33.4468	84	32.3674	114
95	MYO_1950	CP003265	111585..112559	975	hypothetical protein	similar to slr0727	AGF50362.1	1.04305	1.17763	19.1128	29	19.9357	36	22.5078	57
838	rpl12	CP003265	complement(922499..922885)	387	50S ribosomal protein L12	similar to sll1746	AGF51105.1	1.28873	1.1774	1524.28	918	1964.38	1408	1794.69	1804
1183	nth	CP003265	1309045..1309704	660	endonuclease III	similar to slr1822	AGF51450.1	1.25059	1.17739	83.731	86	104.713	128	98.5838	169
375	MYO_13810	CP003265	402392..403534	1143	hybrid sensory kinase	similar to slr1400	AGF50642.1	1.28286	1.17689	62.9656	112	80.7764	171	74.1036	220
1540	ctaC_2	CP003265	complement(1695480..1696382)	903	cytochrome c oxidase subunit II	similar to sll0813	AGF51807.1	1.02763	1.17674	98.9142	139	101.647	170	116.396	273
893	rpoE_1	CP003265	983459..984130	672	RNA polymerase sigma-E factor	similar to slr1545	AGF51160.1	1.07092	1.17653	3106.79	3249	3327.13	4141	3655.22	6380
1560	ycf3	CP003265	1714848..1715369	522	photosystem I assembly related protein	similar to slr0823	AGF51827.1	1.27592	1.1761	66.4745	54	84.816	82	78.1804	106
1412	glbN	CP003265	1560937..1561311	375	cyanoglobin	similar to slr2097	AGF51679.1	1.19293	1.1761	138.799	81	165.577	115	163.241	159
855	MYO_18650	CP003265	complement(935064..936359)	1296	hypothetical protein	similar to sll1734	AGF51122.1	1.07804	1.17568	26.2786	53	28.3295	68	30.8952	104
2857	argS	CP003265	complement(3205967..3207721)	1755	arginyl-tRNA-synthetase	similar to sll0502	AGF53124.1	0.982921	1.17568	19.4058	53	19.0743	62	22.8149	104
2620	MYO_126580	CP003265	complement(2926971..2928023)	1053	hypothetical protein	similar to sll0473	AGF52887.1	0.775605	1.17524	31.7327	52	24.612	48	37.2936	102
306	MYO_13110	CP003265	complement(337861..338331)	471	hypothetical protein	similar to sll0931	AGF50573.1	0.549387	1.17524	35.4719	26	19.4878	17	41.6881	51
1653	MYO_116720	CP003265	complement(1819358..1820107)	750	hypothetical protein	similar to sll1390	AGF51920.1	1.34871	1.17514	199.63	233	269.243	374	234.594	457
2585	MYO_126230	CP003265	2890452..2892047	1596	hypothetical protein	similar to slr0086	AGF52852.1	1.10911	1.17432	10.0656	25	11.1639	33	11.8202	49
728	MYO_17370	CP003265	813454..815259	1806	ABC transporter	similar to slr1149	AGF50995.1	1.20201	1.17332	25.6181	72	30.7931	103	30.0583	141
1170	MYO_111830	CP003265	complement(1294038..1294850)	813	hypothetical protein	similar to sll1696	AGF51437.1	1.01529	1.17332	75.8774	96	77.0374	116	89.0287	188
2110	MYO_121380	CP003265	2341419..2343026	1608	hypothetical protein	similar to slr0360	AGF52377.1	1.08531	1.17332	19.1817	48	20.818	62	22.5063	94
2234	sppA_2	CP003265	2497589..2498422	834	protease IV	similar to slr0021	AGF52501.1	1.01529	1.17332	18.4917	24	18.7744	29	21.6967	47
2129	MYO_121570	CP003265	2380510..2380905	396	hypothetical protein	similar to slr0381	AGF52396.1	0.525149	1.17332	38.9447	24	20.4517	15	45.6946	47
1901	MYO_119250	CP003265	complement(2088979..2089446)	468	hypothetical protein	similar to sll0423	AGF52168.1	1.07264	1.17279	64.5333	47	69.2213	60	75.6841	92
1346	MYO_113610	CP003265	1487312..1488895	1584	eukaryotic Na+/H+ exchanger	similar to slr1727	AGF51613.1	1.40943	1.17252	37.7276	93	53.1745	156	44.2363	182
1797	MYO_118190	CP003265	1973525..1973950	426	hypothetical protein	similar to slr1686	AGF52064.1	0.969905	1.1724	244.364	162	237.01	187	286.492	317
1875	MYO_118980	CP003265	complement(2058369..2059889)	1521	hypothetical protein	similar to sll1526	AGF52142.1	0.876771	1.17224	29.1509	69	25.5586	72	34.1718	135
1796	MYO_118180	CP003265	complement(1972080..1973234)	1155	soluble hydrogenase 42 kD subunit	similar to sll1559	AGF52063.1	0.990879	1.17203	139.644	251	138.371	296	163.667	491
2340	MYO_123760	CP003265	2613892..2614650	759	hypothetical protein	similar to slr0482	AGF52607.1	1.29855	1.17105	18.6257	22	24.1864	34	21.8117	43
670	MYO_16790	CP003265	complement(744311..744748)	438	hypothetical protein	similar to sll1926	AGF50937.1	1.04393	1.17105	193.656	132	202.164	164	226.782	258
3310	MYO_4210	CP003267 (pSYSA_M)	17867..19783	1917	hypothetical protein	similar to slr7023	AGF53577.1	1.23105	1.17042	14.4138	43	17.7441	63	16.8702	84
973	glgP_1	CP003265	complement(1072735..1075284)	2550	glycogen phosphorylase	similar to sll1356	AGF51240.1	1.17237	1.17001	85.4262	339	100.151	473	99.9495	662
2503	map_1	CP003265	complement(2800634..2801551)	918	methionine aminopeptidase	similar to sll0555	AGF52770.1	0.916218	1.1696	131.597	188	120.572	205	153.917	367
2877	MYO_129180	CP003265	3228838..3230148	1311	hypothetical protein	similar to slr0930	AGF53144.1	0.971842	1.16941	40.6825	83	39.5369	96	47.5746	162
2164	MYO_121930	CP003265	complement(2414074..2414475)	402	hypothetical protein	similar to sll0754	AGF52431.1	1.37744	1.16882	195.014	122	268.62	200	227.936	238
1877	MYO_119000	CP003265	complement(2062777..2063076)	300	hypothetical protein	similar to ssl2971	AGF52144.1	1.26036	1.16833	42.8391	20	53.9926	30	50.0502	39
2630	MYO_126680	CP003265	2937070..2937783	714	dethiobiotin synthetase BioD	similar to slr0523	AGF52897.1	1.33038	1.16833	53.9989	60	71.8389	95	63.0885	117
2280	MYO_123150	CP003265	complement(2549445..2550230)	786	hypothetical protein	similar to sll0405	AGF52547.1	1.0713	1.16833	65.4032	80	70.0668	102	76.4126	156
646	MYO_16550	CP003265	complement(715811..719167)	3357	hypothetical protein	similar to sll1582	AGF50913.1	0.798227	1.16833	3.82834	20	3.05588	19	4.47276	39
2395	MYO_124320	CP003265	complement(2674205..2675023)	819	hypothetical protein	similar to sll0601	AGF52662.1	0.840239	1.16772	76.8907	98	64.6066	98	89.7867	191
1854	MYO_118760	CP003265	2033943..2035319	1377	hypothetical protein	similar to slr1624	AGF52121.1	1.04482	1.16703	53.6656	115	56.0708	143	62.6292	224
374	amt2	CP003265	complement(400822..402150)	1329	ammonium/methylammonium permease	similar to sll1017	AGF50641.1	1.23825	1.16675	9.18672	19	11.3754	28	10.7186	37
409	MYO_14160	CP003265	447933..449081	1149	hypothetical protein	similar to slr1591	AGF50676.1	0.796015	1.16675	10.6259	19	8.45837	18	12.3978	37
3513	MYO_3720	CP003269 (pSYSX_M)	66033..68225	2193	hypothetical protein	similar to slr6071	AGF53780.1	1.25657	1.1659	97.5747	0	122.61	0	113.762	0
2017	ndkR	CP003265	complement(2231571..2232020)	450	nucleoside diphosphate kinase	similar to sll1852	AGF52284.1	1.54348	1.16572	131.373	92	202.772	169	153.145	179
624	MYO_16330	CP003265	complement(690401..690766)	366	CheY subfamily	similar to sll1292	AGF50891.1	1.47509	1.165	158.013	90	233.083	158	184.086	175
3437	MYO_5450	CP003268 (pSYSG_M)	39491..40969	1479	hypothetical protein	similar to slr8044	AGF53704.1	1.44708	1.165	7.82053	18	11.3169	31	9.11093	35
3089	ilvD	CP003265	3494994..3496679	1686	dihydroxyacid dehydratase	similar to slr0452	AGF53356.1	1.12032	1.165	157.788	414	176.773	552	183.823	805
286	ho1	CP003265	complement(317127..317849)	723	heme oxygenase	similar to sll1184	AGF50553.1	1.15437	1.1646	1264.73	1423	1459.97	1955	1472.91	2766
899	ftsH_3	CP003265	complement(989372..991258)	1887	cell division protein FtsH	similar to sll1463	AGF51166.1	1.19287	1.1646	169.586	498	202.293	707	197.5	968
1227	MYO_112410	CP003265	1353632..1355023	1392	hypothetical protein	similar to slr0863	AGF51494.1	1.1716	1.16453	32.7756	71	38.3999	99	38.1683	138
1036	fabG_1	CP003265	1152204..1152947	744	3-oxoacyl-[acyl-carrier protein] reductase	similar to slr0886	AGF51303.1	0.792225	1.16405	30.2292	35	23.9483	33	35.1883	68
1506	MYO_115230	CP003265	complement(1662023..1663159)	1137	hybrid sensory kinase	similar to sll1229	AGF51773.1	1.16341	1.16372	29.3883	52	34.1906	72	34.1998	101
1743	fus_2	CP003265	complement(1915002..1917077)	2076	elongation factor EF-G	similar to sll1098	AGF52010.1	1.13554	1.16319	438.606	1417	498.053	1915	510.183	2751
1043	amiA_2	CP003265	1158684..1160459	1776	N-acetylmuramoyl-L-alanine amidase	similar to slr0891	AGF51310.1	1.28507	1.16304	12.3018	34	15.8086	52	14.3075	66
2901	MYO_129420	CP003265	3258674..3259330	657	hypothetical protein	similar to slr0556	AGF53168.1	1.13679	1.16304	33.2541	34	37.8031	46	38.676	66
798	MYO_18070	CP003265	876980..878176	1197	hypothetical protein	similar to slr1197	AGF51065.1	1.05442	1.16304	27.3784	51	28.8682	64	31.8422	99
2475	moeA	CP003265	2768590..2769762	1173	molybdopterin biosynthesis MoeA	similar to slr0900	AGF52742.1	1.82875	1.16304	9.31285	17	17.0309	37	10.8313	33
1724	pdxH	CP003265	complement(1895338..1896030)	693	pyridoxamine 5'-phosphate oxidase	similar to sll1440	AGF51991.1	1.24763	1.16198	30.5994	33	38.1766	49	35.5557	64
839	rpl10	CP003265	complement(922973..923494)	522	50S ribosomal protein L10	similar to sll1745	AGF51106.1	1.11329	1.16132	1716.03	1394	1910.43	1847	1992.86	2702
1310	MYO_113250	CP003265	1445566..1446381	816	hypothetical protein	similar to slr2001	AGF51577.1	1.18972	1.16117	88.9857	113	105.868	160	103.328	219
775	MYO_17840	CP003265	845137..845529	393	hypothetical protein	similar to slr1896	AGF51042.1	1.15533	1.16084	26.1613	16	30.2249	22	30.3691	31
122	MYO_11220	CP003265	complement(141123..141416)	294	transposase	similar to ssl0426	AGF50389.1	0.761466	1.16084	69.9414	32	53.258	29	81.1908	62
2155	MYO_121840	CP003265	complement(2406840..2407199)	360	hypothetical protein	similar to sll0761	AGF52422.1	1.4004	1.16041	310.584	174	434.941	290	360.404	337
2556	MYO_125940	CP003265	complement(2857339..2857557)	219	hypothetical protein	similar to ssl1533	AGF52823.1	1.39876	1.15986	1006.43	343	1407.75	571	1167.31	664
3488	MYO_3470	CP003269 (pSYSX_M)	43486..43689	204	hypothetical protein	similar to ssr6046	AGF53755.1	1.05707	1.15963	195.296	62	206.442	78	226.472	120
2574	gmhA	CP003265	complement(2877233..2877817)	585	phosphoheptose isomerase	similar to sll0083	AGF52841.1	1.1945	1.15942	203.211	185	242.736	263	235.608	358
3239	MYO_2800	CP003266 (pSYSM_M)	complement(77192..78010)	819	hypothetical protein	similar to sll5079	AGF53506.1	1.34989	1.159	47.8606	61	64.6066	98	55.4703	118
2388	MYO_124250	CP003265	2663308..2664789	1482	hypothetical protein	similar to slr0643	AGF52655.1	1.09486	1.15834	71.5431	165	78.3294	215	82.8715	319
2915	ape2	CP003265	complement(3272582..3275191)	2610	aminopeptidase	similar to sll1343	AGF53182.1	1.06135	1.15774	32.7448	133	34.7539	168	37.9101	257
3416	MYO_5240	CP003268 (pSYSG_M)	19938..21278	1341	hypothetical protein	similar to slr8023	AGF53683.1	1.06939	1.15744	21.0841	44	22.5473	56	24.4035	85
479	MYO_14860	CP003265	532588..536976	4389	hybrid sensory kinase	similar to slr1759	AGF50746.1	1.44869	1.15697	12.7375	87	18.4527	150	14.7369	168
3061	MYO_131090	CP003265	3457935..3458513	579	hypothetical protein	similar to slr1660	AGF53328.1	0.977022	1.15649	47.7223	43	46.6258	50	55.1902	83
484	MYO_14910	CP003265	540365..541567	1203	hypothetical protein	similar to slr1763	AGF50751.1	0.970416	1.15609	37.9249	71	36.8029	82	43.8448	137
51	MYO_1510	CP003265	61834..63591	1758	hypothetical protein	similar to slr1114	AGF50318.1	1.18825	1.15581	97.9598	268	116.4	379	113.223	517
948	MYO_19590	CP003265	complement(1046057..1046485)	429	hypothetical protein	similar to sll1131	AGF51215.1	1.20034	1.15549	41.9404	28	50.3428	40	48.4618	54
2637	MYO_126750	CP003265	2943612..2945354	1743	ABC transporter	similar to slr0615	AGF52904.1	1.06726	1.15549	118.711	322	126.695	409	137.169	621
2361	MYO_123970	CP003265	complement(2633504..2633992)	489	hypothetical protein	similar to sll0685	AGF52628.1	0.840239	1.15549	18.3972	14	15.458	14	21.2578	27
847	MYO_18570	CP003265	complement(928461..929540)	1080	hypothetical protein	similar to sll1739	AGF51114.1	1.37604	1.15487	41.0542	69	56.4923	113	47.4122	133
197	ccmK_1	CP003265	complement(218742..219077)	336	carbon dioxide concentrating mechanism protein CcmK	similar to sll1029	AGF50464.1	1.24977	1.15465	682.748	357	853.276	531	788.337	688
10	lig_1	CP003265	complement(10622..12631)	2010	DNA ligase	similar to sll1209	AGF50277.1	1.22962	1.15445	13.1075	41	16.1172	60	15.1319	79
2402	MYO_124390	CP003265	complement(2681466..2682092)	627	hypothetical protein	similar to sll0394	AGF52669.1	1.20912	1.15445	42.0192	41	50.8065	59	48.509	79
2062	MYO_120900	CP003265	complement(2282677..2283264)	588	hypothetical protein	similar to sll0297	AGF52329.1	1.30361	1.15423	148.626	136	193.749	211	171.548	262
2480	MYO_125170	CP003265	2772592..2772876	285	hypothetical protein	similar to ssr1528	AGF52747.1	1.20784	1.15335	180.375	80	217.865	115	208.036	154
1567	tsf	CP003265	complement(1719819..1720475)	657	elongation factor TS	similar to sll1261	AGF51834.1	1.20679	1.15204	291.463	298	351.733	428	335.778	573
2379	MYO_124160	CP003265	complement(2654416..2654862)	447	hypothetical protein	similar to sll0611	AGF52646.1	0.95227	1.15169	129.38	90	123.205	102	149.005	173
2537	MYO_125750	CP003265	complement(2833084..2834778)	1695	low affinity sulfate transporter	similar to sll0834	AGF52804.1	1.4663	1.1513	19.3345	51	28.3501	89	22.2597	98
905	lysS	CP003265	994930..996462	1533	lysyl-tRNA synthetase	similar to slr1550	AGF51172.1	1.22702	1.15074	26.4077	63	32.4026	92	30.3883	121
1020	MYO_110330	CP003265	1135371..1136822	1452	amidase	similar to slr0877	AGF51287.1	1.26392	1.15005	104.442	236	132.007	355	120.114	453
2321	MYO_123570	CP003265	complement(2592548..2593834)	1287	processing protease	similar to sll0055	AGF52588.1	1.09982	1.14958	61.4127	123	67.5432	161	70.5986	236
1477	MYO_114940	CP003265	1631007..1631843	837	hypothetical protein	similar to slr2119	AGF51744.1	3.01085	1.14836	9.21271	12	27.7381	43	10.5795	23
413	MYO_14200	CP003265	453316..454548	1233	Na/H antiporter	similar to slr1595	AGF50680.1	1.47042	1.14836	6.25389	12	9.19582	21	7.1817	23
1763	MYO_117850	CP003265	1935943..1936779	837	hypothetical protein	similar to slr1169	AGF52030.1	1.26036	1.14836	18.4254	24	23.2226	36	21.159	46
2360	MYO_123960	CP003265	complement(2632487..2633314)	828	hypothetical protein	similar to sll0686	AGF52627.1	1.19034	1.14836	9.31285	12	11.0854	17	10.6945	23
2079	guaB_2	CP003265	2301361..2301828	468	IMP dehydrogenase	similar to slr0172	AGF52346.1	1.20784	1.14836	131.813	96	159.209	138	151.368	184
1173	MYO_111860	CP003265	complement(1296113..1297435)	1323	hypothetical protein	similar to sll1693	AGF51440.1	1.01634	1.14806	81.1126	167	82.4377	202	93.1221	320
2956	MYO_130020	CP003265	3327549..3328310	762	hypothetical protein	similar to slr0654	AGF53223.1	0.950929	1.14806	140.829	167	133.919	189	161.681	320
1624	MYO_116430	CP003265	1782324..1783403	1080	hypothetical protein	similar to slr1972	AGF51891.1	1.1167	1.14804	92.2231	155	102.986	206	105.875	297
2818	MYO_128570	CP003265	complement(3155374..3156384)	1011	hypothetical protein	similar to sll0037	AGF53085.1	1.11508	1.14789	68.0087	107	75.8353	142	78.0666	205
3456	MYO_3150	CP003269 (pSYSX_M)	15036..16439	1404	hypothetical protein	similar to slr6014	AGF53723.1	0.697219	1.1473	21.5111	0	14.9979	0	24.6796	0
294	trpA	CP003265	326150..326944	795	tryptophan synthase alpha chain	similar to slr0966	AGF50561.1	0.956134	1.14664	46.8805	58	44.8241	66	53.755	111
1334	lacG	CP003265	1475314..1476126	813	lactose transport system permease protein LacG	similar to slr1723	AGF51601.1	1.35169	1.14619	18.179	23	24.5723	37	20.8365	44
348	MYO_13540	CP003265	377620..378951	1332	hypothetical protein	similar to slr1074	AGF50615.1	0.963803	1.14542	16.4024	34	15.8086	39	18.7876	65
986	MYO_19980	CP003265	complement(1091353..1092549)	1197	hypothetical protein	similar to sll1350	AGF51253.1	1.21093	1.14542	18.2523	34	22.1022	49	20.9065	65
860	psaB	CP003265	943842..946037	2196	P700 apoprotein subunit Ib	similar to slr1835	AGF51127.1	1.25397	1.14508	15870.1	54235	19900.6	80940	18172.6	103654
501	MYO_15080	CP003265	554229..554552	324	hypothetical protein	similar to slr1846	AGF50768.1	1.01962	1.14443	176.513	89	179.975	108	202.007	170
1756	met3	CP003265	1929608..1930780	1173	sulfate adenylyltransferase	similar to slr1165	AGF52023.1	0.966274	1.14436	54.7815	100	52.9339	115	62.69	191
2780	gdhA	CP003265	3109785..3111071	1287	glutamate dehydrogenase (NADP+)	similar to slr0710	AGF53047.1	1.19067	1.14434	105.35	211	125.437	299	120.556	403
1999	MYO_120250	CP003265	complement(2213743..2216442)	2700	chloride channel protein	similar to sll1864	AGF52266.1	0.863085	1.14398	78.7764	331	67.9907	340	90.1189	632
2592	MYO_126300	CP003265	2899275..2899937	663	O-methyltransferase	similar to slr0095	AGF52859.1	2.36794	1.14382	10.6613	11	25.2454	31	12.1946	21
1097	MYO_111100	CP003265	complement(1222136..1223116)	981	OppB in a binding protein-dependent transport system	similar to sll1768	AGF51364.1	1.52771	1.14382	21.6161	33	33.023	60	24.7249	63
571	MYO_15780	CP003265	628900..630006	1107	hypothetical protein	similar to slr1920	AGF50838.1	1.06939	1.14382	19.1557	33	20.485	42	21.9107	63
2802	MYO_128410	CP003265	complement(3133287..3135872)	2586	hypothetical protein	similar to sll0737	AGF53069.1	0.947178	1.14382	13.6668	55	12.9449	62	15.6323	105
2820	aspC_3	CP003265	3157985..3159154	1170	aspartate aminotransferase	similar to slr0036	AGF53087.1	0.993009	1.14382	12.0828	22	11.9984	26	13.8206	42
859	psaA	CP003265	941341..943596	2256	P700 apoprotein subunit Ia	similar to slr1834	AGF51126.1	1.17597	1.14257	18279	64174	21495.6	89816	20885	122380
2397	MYO_124340	CP003265	2677152..2677757	606	hypothetical protein	similar to slr0650	AGF52664.1	1.54369	1.14255	45.5961	43	70.3864	79	52.0959	82
2264	trxM	CP003265	2534788..2535105	318	thioredoxin M	similar to slr0233	AGF52531.1	1.23287	1.14229	216.216	107	266.567	157	246.982	204
3052	ama_2	CP003265	3449266..3450516	1251	N-acyl-L-amino acid amidohydrolase	similar to slr1653	AGF53319.1	1.08312	1.14212	65.7483	128	71.2133	165	75.0923	244
3401	MYO_590	CP003268 (pSYSG_M)	complement(6377..6601)	225	hypothetical protein	similar to ssl8008	AGF53668.1	1.58536	1.14176	151.365	53	239.967	100	172.823	101
1862	rfbP	CP003265	complement(2041576..2042307)	732	galactosyl-1-phosphate transferase	similar to sll1535	AGF52129.1	1.12882	1.14157	723.349	824	816.528	1107	825.755	1570
674	ndhD_1	CP003265	747076..748539	1464	NADH dehydrogenase subunit 4	similar to slr2007	AGF50941.1	1.52043	1.14123	9.21743	21	14.0145	38	10.5192	40
1096	MYO_111090	CP003265	complement(1221725..1221901)	177	hypothetical protein	similar to ssl3382	AGF51363.1	1.08031	1.14123	152.478	42	164.723	54	174.012	80
2865	MYO_129040	CP003265	complement(3216427..3217254)	828	hypothetical protein	similar to sll0497	AGF53132.1	1.02029	1.14123	32.595	42	33.2563	51	37.1982	80
2621	MYO_126590	CP003265	2928036..2928650	615	hypothetical protein	similar to slr0517	AGF52888.1	0.920809	1.14083	76.2745	73	70.2343	80	87.0166	139
1141	gyrB	CP003265	complement(1262798..1266034)	3237	DNA gyrase B subunit	similar to sll2005	AGF51408.1	1.10235	1.13996	89.7279	452	98.9114	593	102.287	860
821	mgtE	CP003265	903770..905161	1392	Mg2+ transporter	similar to slr1216	AGF51088.1	1.31159	1.13983	18.9268	41	24.8242	64	21.5734	78
729	MYO_17380	CP003265	815358..815870	513	hypothetical protein	similar to slr1150	AGF50996.1	0.936659	1.13935	76.409	61	71.5692	68	87.0569	116
882	MYO_18920	CP003265	972140..973609	1470	hypothetical protein	similar to slr1535	AGF51149.1	1.02601	1.13919	128.517	294	131.86	359	146.405	559
288	rpl28	CP003265	318661..318897	237	50S ribosomal protein L28	similar to ssr1604	AGF50555.1	1.14612	1.13905	1206.54	445	1382.85	607	1374.31	846
269	psbU	CP003265	complement(297493..297888)	396	photosystem II 12 kD extrinsic protein	similar to sll1194	AGF50536.1	1.58913	1.13876	2253.92	1389	3581.78	2627	2566.68	2640
176	MYO_11780	CP003265	192136..192783	648	hypothetical protein	similar to slr1095	AGF50443.1	0.756215	1.13837	9.91646	10	7.49897	9	11.2886	19
2461	MYO_124980	CP003265	2746498..2747709	1212	hypothetical protein	similar to slr0211	AGF52728.1	1.1906	1.13837	280.999	530	334.558	751	319.882	1007
1813	MYO_118350	CP003265	complement(1991846..1992514)	669	NarL subfamily	similar to sll0921	AGF52080.1	1.13432	1.13837	57.6311	60	65.3722	81	65.6057	114
3071	MYO_131190	CP003265	complement(3471272..3471709)	438	hypothetical protein	similar to sll1543	AGF53338.1	1.09231	1.13837	29.3419	20	32.0504	26	33.402	38
1426	MYO_114420	CP003265	1580675..1581667	993	hypothetical protein	similar to slr1503	AGF51693.1	0.948269	1.13837	45.2982	70	42.9549	79	51.5662	133
3042	MYO_130900	CP003265	3429453..3430352	900	hypothetical protein	similar to slr0756	AGF53309.1	0.924262	1.13837	14.2797	20	13.1982	22	16.2556	38
3534	MYO_3930	CP003269 (pSYSX_M)	complement(87011..87274)	264	hypothetical protein	similar to ssl6092	AGF53801.1	0.756215	1.13837	24.3404	10	18.4066	9	27.7085	19
1568	rps2	CP003265	complement(1720629..1721438)	810	30S ribosomal protein S2	similar to sll1260	AGF51835.1	1.12322	1.13827	459.331	579	515.929	774	522.842	1100
2120	accD	CP003265	complement(2369518..2370498)	981	acetyl-CoA carboxylase beta subunit	similar to sll0336	AGF52387.1	1.16785	1.13782	142.797	218	166.766	303	162.478	414
2072	MYO_121000	CP003265	2292419..2294608	2190	hypothetical protein	similar to slr0337	AGF52339.1	1.22991	1.1375	20.2459	69	24.9007	101	23.0298	131
2455	MYO_124920	CP003265	2740563..2742185	1623	hypothetical protein	similar to slr0207	AGF52722.1	1.21749	1.13715	19.4003	49	23.6197	71	22.0611	93
289	MYO_12930	CP003265	319096..320529	1434	hypothetical protein	similar to slr0962	AGF50556.1	1.22804	1.13684	122.333	273	150.231	399	139.073	518
768	rpl2	CP003265	complement(839777..840607)	831	50S ribosomal protein L2	similar to sll1802	AGF51035.1	1.21883	1.13676	602.377	779	734.196	1130	684.756	1478
2928	MYO_129700	CP003265	complement(3289445..3290152)	708	hypothetical protein	similar to sll1333	AGF53195.1	1.36177	1.13631	26.3206	29	35.8426	47	29.9083	55
2530	MYO_125680	CP003265	complement(2824022..2825215)	1194	hypothetical protein	similar to sll0539	AGF52797.1	1.18792	1.13631	15.6072	29	18.5402	41	17.7346	55
1550	entC	CP003265	1702844..1704268	1425	isochorismate synthase	similar to slr0817	AGF51817.1	1.18792	1.13631	26.1544	58	31.0694	82	29.7194	110
3127	MYO_131750	CP003265	complement(3533797..3534306)	510	hypothetical protein	similar to sll0577	AGF53394.1	1.29206	1.13611	133.557	106	172.565	163	151.736	201
1878	prk	CP003265	complement(2063269..2064267)	999	phosphoribulokinase	similar to sll1525	AGF52145.1	1.26463	1.13611	886.371	1378	1120.93	2074	1007.02	2613
1987	pilC	CP003265	2201425..2202639	1215	pilin biogenesis protein PilC, required for twitching motility		AGF52254.1	1.36889	1.13588	126.931	240	173.754	391	144.178	455
632	hliA_2	CP003265	complement(700640..700852)	213	high light-inducible protein	similar to ssl2542	AGF50899.1	0.514176	1.13569	202.128	67	103.929	41	229.555	127
514	MYO_15210	CP003265	569046..570074	1029	hypothetical protein	similar to slr2034	AGF50781.1	1.36878	1.13547	154.87	248	211.983	404	175.851	470
602	MYO_16110	CP003265	complement(668756..669253)	498	hypothetical protein	similar to sll0981	AGF50869.1	1.29721	1.13522	73.5491	57	95.4086	88	83.4943	108
597	MYO_16060	CP003265	complement(664405..666519)	2115	hypothetical protein	similar to sll0985	AGF50864.1	1.19402	1.13522	5.77265	19	6.89267	27	6.55322	36
3219	MYO_2600	CP003266 (pSYSM_M)	complement(60291..61199)	909	two-component response regulator	similar to sll5059	AGF53486.1	1.19402	1.13522	40.2942	57	48.1122	81	45.7428	108
1080	MYO_110930	CP003265	1201498..1202568	1071	hypothetical protein	similar to slr1864	AGF51347.1	1.1498	1.13522	11.3998	19	13.1075	26	12.9412	36
2274	MYO_123090	CP003265	complement(2544335..2545297)	963	hypothetical protein	similar to sll0409	AGF52541.1	1.1498	1.13522	12.6782	19	14.5774	26	14.3926	36
896	MYO_19070	CP003265	complement(986147..987388)	1242	hypothetical protein	similar to sll1466	AGF51163.1	1.00239	1.13522	29.4907	57	29.5612	68	33.4784	108
190	upp	CP003265	complement(209896..210546)	651	uracil phosphoribosyltransferase	similar to sll1035	AGF50457.1	0.79945	1.1343	101.669	103	81.2792	98	115.323	195
2540	MYO_125780	CP003265	2836957..2837172	216	hypothetical protein	similar to ssr1407	AGF52807.1	0.750213	1.13409	83.2983	28	62.4915	25	94.468	53
1329	MYO_113440	CP003265	1469079..1469804	726	hypothetical protein	similar to slr1718	AGF51596.1	1.16952	1.13351	65.4978	74	76.6011	103	74.2428	140
142	MYO_11430	CP003265	complement(156741..157013)	273	hypothetical protein	similar to ssl0410	AGF50409.1	1.20358	1.13351	174.181	74	209.642	106	197.437	140
2533	rpl33	CP003265	2828374..2828571	198	50S ribosomal protein L33	similar to ssr1398	AGF52800.1	1.15076	1.13316	447.864	138	515.384	189	507.502	261
2416	lpxA	CP003265	complement(2695526..2696413)	888	acyl-[acyl-carrier-protein]--UDP-N- acetylglucosamine o-acyltransferase	similar to sll0379	AGF52683.1	1.26036	1.13316	33.2872	46	41.9537	69	37.7198	87
164	MYO_11650	CP003265	178237..179682	1446	hypothetical protein	similar to slr1413	AGF50431.1	0.748576	1.13293	24.4414	55	18.2963	49	27.6903	104
1704	ndhC	CP003265	1873598..1873960	363	NADH dehydrogenase subunit 3	similar to slr1279	AGF51971.1	0.955868	1.13233	192.953	109	184.438	124	218.486	206
2644	MYO_126820	CP003265	2954393..2954632	240	hypothetical protein		AGF52911.1	1.58712	1.13172	24.097	9	38.2448	17	27.271	17
2354	MYO_123900	CP003265	complement(2627737..2628339)	603	hypothetical protein	similar to sll0691	AGF52621.1	1.23235	1.13172	47.9542	45	59.0964	66	54.2706	85
3340	MYO_4510	CP003267 (pSYSA_M)	complement(42378..42620)	243	hypothetical protein	similar to ssl7053	AGF53607.1	1.21368	1.13172	23.7995	9	28.8849	13	26.9343	17
3353	MYO_4640	CP003267 (pSYSA_M)	complement(56128..58503)	2376	hypothetical protein	similar to sll7066	AGF53620.1	0.914926	1.13172	60.851	225	55.6742	245	68.866	425
2774	MYO_128130	CP003265	complement(3105911..3106291)	381	transposase	similar to sll0668	AGF53041.1	0.746879	1.13172	15.1792	8	11.337	8	17.1786	15
379	cysC	CP003265	414973..415506	534	adenylylsulfate 3'-phosphotransferase	similar to slr0676	AGF50646.1	1.36928	1.13172	32.4903	27	44.4883	44	36.7698	51
73	gpmB	CP003265	85058..86107	1050	phosphoglycerate mutase	similar to slr1124	AGF50340.1	0.921928	1.13172	44.0631	72	40.623	79	49.8669	136
1761	gldA	CP003265	1934381..1935538	1158	glycerol dehydrogenase	similar to slr1167	AGF52028.1	1.19099	1.13109	178.126	321	212.147	455	201.478	606
2959	lysC	CP003265	3330512..3332314	1803	aspartate kinase	similar to slr0657	AGF53226.1	0.691164	1.13064	44.1934	124	30.5449	102	49.9669	234
767	rps19	CP003265	complement(839466..839744)	279	30S ribosomal protein S19	similar to ssl3432	AGF51034.1	1.11899	1.13014	485.971	211	543.797	281	549.214	398
1316	MYO_113310	CP003265	1453371..1454177	807	hypothetical protein	similar to slr1712	AGF51583.1	1.16995	1.13003	62.905	78	73.5959	107	71.0846	149
1182	MYO_111950	CP003265	1307952..1309052	1101	hypothetical protein	similar to slr1821	AGF51449.1	0.849372	1.12991	107.39	184	91.2137	186	121.34	347
3274	MYO_21150	CP003266 (pSYSM_M)	complement(106087..106371)	285	hypothetical protein	similar to ssl5114	AGF53541.1	1.22804	1.12916	58.622	26	71.9902	38	66.1933	49
2055	MYO_120830	CP003265	complement(2276764..2277273)	510	hypothetical protein	similar to sll0301	AGF52322.1	1.34829	1.12862	54.1789	43	73.0488	69	61.1473	81
551	MYO_15580	CP003265	609450..609989	540	hypothetical protein	similar to slr1907	AGF50818.1	1.21151	1.12862	51.1689	43	61.9915	62	57.7503	81
2731	MYO_127700	CP003265	3058625..3060790	2166	hypothetical protein	similar to slr0798	AGF52998.1	0.762077	1.12862	12.7568	43	9.72166	39	14.3976	81
3139	recA	CP003265	complement(3546047..3547111)	1065	RecA	similar to sll0569	AGF53406.1	1.03739	1.128	108.003	179	112.041	221	121.827	337
648	MYO_16570	CP003265	720931..721194	264	hypothetical protein	similar to ssr2843	AGF50915.1	1.58163	1.1278	41.3787	17	65.4456	32	46.6669	32
240	dnaJ_1	CP003265	complement(265414..265938)	525	DnaJ protein	similar to sll1666	AGF50507.1	0.93909	1.1278	41.6151	34	39.0804	38	46.9335	64
989	ribH	CP003265	complement(1094304..1094798)	495	riboflavin synthase beta subunit	similar to sll1282	AGF51256.1	1.268	1.12748	142.797	110	181.066	166	161.001	207
2548	hemH	CP003265	2846364..2847527	1164	ferrochelatase	similar to slr0839	AGF52815.1	1.20056	1.12741	298.659	541	358.559	773	336.711	1018
276	MYO_12800	CP003265	303939..305546	1608	hypothetical protein	similar to slr1301	AGF50543.1	1.16779	1.1272	70.7325	177	82.6006	246	79.7298	333
2258	ycf43	CP003265	complement(2528933..2529697)	765	putative sec-independent protein translocase	similar to sll0194	AGF52525.1	1.02509	1.12639	83.9983	100	86.1059	122	94.6148	188
3064	MYO_131120	CP003265	3461870..3463834	1965	hypothetical protein	similar to slr1661	AGF53331.1	1.05666	1.12566	21.5831	66	22.806	83	24.2953	124
1822	MYO_118440	CP003265	2004589..2005032	444	hypothetical protein	similar to slr0941	AGF52089.1	1.01847	1.12566	47.7598	33	48.642	40	53.7615	62
1137	hupE	CP003265	1259687..1260463	777	hydrogenase accessory protein	similar to slr2135	AGF51404.1	0.903893	1.12566	54.5827	66	49.3369	71	61.4417	124
111	trpE_1	CP003265	127186..128712	1527	anthranilate synthetase alpha-subunit	similar to slr0738	AGF50378.1	1.12984	1.12558	86.6882	206	97.9434	277	97.5741	387
650	serS	CP003265	722072..723364	1293	seryl-tRNA synthetase	similar to slr1703	AGF50917.1	1.03493	1.12522	40.7518	82	42.1752	101	45.8548	154
2668	MYO_127070	CP003265	2982253..2983509	1257	hypothetical protein	similar to slr0108	AGF52935.1	0.942707	1.12522	20.9595	41	19.7586	46	23.584	77
2969	dsbD	CP003265	complement(3344178..3344924)	747	thiol:disulfide interchange protein DsbD	similar to sll0621	AGF53236.1	0.990525	1.12522	105.807	123	104.805	145	119.057	231
1532	rfbB_2	CP003265	1688417..1689403	987	dTDP-glucose 4-6-dehydratase	similar to slr0809	AGF51799.1	1.01762	1.12506	58.5945	90	59.6271	109	65.9223	169
2875	psbD2	CP003265	3227049..3228107	1059	photosystem II D2 protein	similar to slr0927	AGF53142.1	1.05616	1.12481	10113.3	16496	10681.3	20858	11375.5	31146
1824	fda	CP003265	2006319..2007221	903	fructose-bisphosphate aldolase	similar to slr0943	AGF52091.1	1.26036	1.12481	75.431	106	95.0701	159	84.8453	199
823	MYO_18320	CP003265	906627..907481	855	hypothetical protein	similar to slr2070	AGF51090.1	1.38316	1.12455	97.7033	130	135.139	214	109.872	244
966	MYO_19770	CP003265	1060897..1061766	870	hypothetical protein	similar to slr1438	AGF51233.1	1.0004	1.12449	251.864	341	251.966	406	283.22	640
1915	MYO_119400	CP003265	2103081..2104913	1833	hypothetical protein	similar to slr0280	AGF52182.1	1.0161	1.12397	45.223	129	45.9512	156	50.8295	242
1879	petH	CP003265	2064790..2066031	1242	ferredoxin-NADP oxidoreductase	similar to slr1643	AGF52146.1	1.13971	1.1236	560.323	1083	638.608	1469	629.58	2031
439	MYO_14460	CP003265	complement(475975..477501)	1527	hypothetical protein	similar to sll1503	AGF50706.1	1.36539	1.12339	20.1992	48	27.5797	78	22.6917	90
3154	MYO_132020	CP003265	3562852..3563811	960	hypothetical protein	similar to slr0605	AGF53421.1	1.12032	1.12339	32.1293	48	35.9951	64	36.0939	90
2141	MYO_121690	CP003265	2391805..2392140	336	hypothetical protein	similar to slr0771	AGF52408.1	1.57545	1.12339	15.2997	8	24.1038	15	17.1876	15
3131	MYO_131790	CP003265	complement(3536417..3537355)	939	HrEpiB	similar to sll0576	AGF53398.1	1.36539	1.12339	38.3225	56	52.3251	91	43.0513	105
1440	MYO_114560	CP003265	complement(1597441..1598007)	567	hypothetical protein	similar to sll1418	AGF51707.1	1.19572	1.12339	117.864	104	140.933	148	132.408	195
1592	murF	CP003265	1747615..1748979	1365	UDP-N-acetylmuramoylalanyl-D-glutamyl-2,6- diamino-pimelate-D-alanyl-D-alanine ligase	similar to slr1351	AGF51859.1	0.853367	1.12339	30.1286	64	25.7108	65	33.8463	120
1429	proS	CP003265	complement(1583678..1585531)	1854	proline-tRNA ligase	similar to sll1425	AGF51696.1	1.4712	1.12256	93.234	269	137.166	471	104.661	504
944	MYO_19550	CP003265	1042654..1043535	882	hypothetical protein	similar to slr1235	AGF51211.1	1.2444	1.12245	57.556	79	71.6229	117	64.6035	148
574	MYO_15810	CP003265	631715..632659	945	hypothetical protein	similar to slr1019	AGF50841.1	0.533485	1.12221	42.8391	63	22.854	40	48.0743	118
203	MYO_12050	CP003265	complement(224897..226363)	1467	hypothetical protein	similar to sll1686	AGF50470.1	1.02356	1.12203	24.0915	55	24.6592	67	27.0315	103
2159	purF	CP003265	complement(2410094..2411581)	1488	amidophosphoribosyltransferase	similar to sll0757	AGF52426.1	1.16377	1.12194	311.793	722	362.854	1000	349.813	1352
840	rpl1	CP003265	complement(923741..924457)	717	50S ribosomal protein L1	similar to sll1744	AGF51107.1	1.07719	1.12158	1001.07	1117	1078.35	1432	1122.79	2091
2071	apcE	CP003265	2289455..2292145	2691	phycobilisome LCM core-membrane linker polypeptide	similar to slr0335	AGF52338.1	1.21891	1.12157	1413.64	5920	1723.11	8588	1585.5	11082
3387	MYO_4980	CP003267 (pSYSA_M)	94615..95964	1350	hypothetical protein	similar to slr7100	AGF53654.1	1.32499	1.12147	37.1272	78	49.1933	123	41.6372	146
3105	MYO_131530	CP003265	3513978..3514826	849	hypothetical protein	similar to slr1177	AGF53372.1	1.00829	1.12125	105.962	140	106.841	168	118.811	262
112	crtE	CP003265	128802..129710	909	geranylgeranyl pyrophosphate synthase	similar to slr0739	AGF50379.1	1.1926	1.12098	87.6576	124	104.54	176	98.2623	232
958	pntA	CP003265	1053610..1055202	1593	pyridine nucleotide transhydrogenase alpha subunit	similar to slr1239	AGF51225.1	0.996065	1.12058	332.79	825	331.48	978	372.918	1543
78	MYO_1780	CP003265	90620..91411	792	hypothetical protein	similar to slr1127	AGF50345.1	1.22921	1.12033	536.3	661	659.228	967	600.836	1236
1022	gcvH	CP003265	1137865..1138263	399	glycine decarboxylase complex H-protein	similar to slr0879	AGF51289.1	1.33342	1.12014	74.0827	46	98.7835	73	82.9828	86
1152	MYO_111650	CP003265	complement(1275578..1275862)	285	hypothetical protein	similar to ssl3291	AGF51419.1	1.06063	1.11971	137.536	61	145.875	77	154.001	114
113	MYO_11130	CP003265	129791..130186	396	hypothetical protein	similar to slr0740	AGF50380.1	0.972908	1.11945	61.6624	38	59.9918	44	69.0281	71
879	hisC_1	CP003265	complement(969417..970475)	1059	histidinol-phosphate aminotransferase	similar to sll1713	AGF51146.1	1.10865	1.11923	87.3772	144	96.8706	190	97.7955	269
2349	MYO_123850	CP003265	complement(2622746..2623747)	1002	hypothetical protein	similar to sll0456	AGF52616.1	1.27271	1.11899	43.6087	68	55.5014	103	48.7976	127
3162	MYO_230	CP003266 (pSYSM_M)	complement(574..921)	348	hypothetical protein	similar to sll5002	AGF53429.1	1.16233	1.1184	110.791	60	128.775	83	123.909	112
3281	MYO_21220	CP003266 (pSYSM_M)	110068..110283	216	hypothetical protein	similar to ssr5121	AGF53548.1	1.0643	1.1184	44.6241	15	47.4935	19	49.9076	28
2730	smtB	CP003265	complement(3058075..3058473)	399	transcriptional repressor SmtB	similar to sll0792	AGF52997.1	0.896254	1.1184	24.1574	15	21.6512	16	27.0177	28
1499	spoT	CP003265	1654512..1656794	2283	(p)ppGpp 3'-pyrophosphohydrolase	similar to slr1325	AGF51766.1	1.13236	1.11776	157.058	558	177.847	752	175.553	1041
172	MYO_11730	CP003265	complement(186601..188898)	2298	hypothetical protein	similar to sll1040	AGF50439.1	0.811756	1.11705	16.4981	59	13.3924	57	18.4292	110
1102	rps6	CP003265	complement(1226061..1226402)	342	30S ribosomal protein S6	similar to sll1767	AGF51369.1	1.0588	1.1169	650.102	346	688.327	436	726.1	645
582	argD	CP003265	640239..641528	1290	N-acetylornithine aminotransferase	similar to slr1022	AGF50849.1	1.13498	1.11673	95.1427	191	107.985	258	106.249	356
2084	MYO_121120	CP003265	complement(2305784..2306638)	855	hypothetical protein	similar to sll0174	AGF52351.1	1.12668	1.11659	33.0688	44	37.2581	59	36.9241	82
876	MYO_18860	CP003265	complement(967222..968007)	786	transposase	similar to sll1716	AGF51143.1	0.954817	1.11659	17.9859	8	17.1732	13	20.0828	21
1646	MYO_116650	CP003265	1810215..1812026	1812	regulatory components of sensory transduction system	similar to slr1983	AGF51913.1	0.782291	1.11565	10.2842	29	8.04526	27	11.4736	54
547	gylA	CP003265	complement(602945..604228)	1284	serine hydroxymethyltransferase	similar to sll1931	AGF50814.1	1.20177	1.11545	419.883	839	504.604	1200	468.359	1562
2348	rfbM_2	CP003265	2622363..2622749	387	phosphomannose isomerase	similar to slr0493	AGF52615.1	0.863578	1.11507	59.7755	36	51.6209	37	66.654	67
354	galE_2	CP003265	382949..383266	318	UDP-glucose-4-epimerase	similar to slr1078	AGF50621.1	1.00362	1.11507	72.7457	36	73.0089	43	81.1167	67
1129	MYO_111420	CP003265	complement(1251063..1251677)	615	hypothetical protein	similar to sll2015	AGF51396.1	1.05518	1.11469	44.9288	43	47.4082	54	50.0815	80
2213	MYO_122460	CP003265	2472462..2473115	654	hypothetical protein	similar to slr0006	AGF52480.1	1.14491	1.1145	604.267	615	691.832	838	673.459	1144
1086	MYO_110990	CP003265	complement(1210108..1210890)	783	hypothetical protein	similar to sll1774	AGF51353.1	1.34438	1.11441	41.0336	47	55.1649	77	45.7282	89
1392	ctaD_2	CP003265	1539119..1540753	1635	cytochrome c oxidase subunit I	similar to slr2082	AGF51659.1	1.2071	1.1139	55.8088	142	67.3669	204	62.1654	264
459	envM	CP003265	503985..504821	837	enoyl-[acyl-carrier-protein] reductase	similar to slr1051	AGF50726.1	1.25444	1.1139	54.5086	71	68.3777	106	60.7171	132
2444	rpoD_4	CP003265	complement(2728828..2730042)	1215	RNA polymerase sigma factor	similar to sll0184	AGF52711.1	1.01126	1.11345	59.7632	113	60.4362	136	66.5435	210
444	gdhB	CP003265	483428..484666	1239	glucose dehydrogenase-B	similar to slr1608	AGF50711.1	0.959532	1.11322	84.0186	162	80.6185	185	93.5315	301
171	MYO_11720	CP003265	complement(185772..186554)	783	ABC transporter	similar to sll1041	AGF50438.1	1.28036	1.1127	17.2341	21	22.0659	32	19.1763	39
2886	cysQ	CP003265	complement(3236142..3237017)	876	ammonium transport protein	similar to sll0895	AGF53153.1	0.936266	1.1127	25.6741	35	24.0378	39	28.5675	65
1893	MYO_119160	CP003265	2081843..2082028	186	hypothetical protein	similar to ssr0756	AGF52160.1	1.56044	1.1127	24.1834	7	37.7368	13	26.9087	13
2396	metS	CP003265	2675408..2677006	1599	methionyl-tRNA synthetase	similar to slr0649	AGF52663.1	1.14494	1.1127	36.57	91	41.8704	124	40.6912	169
3418	MYO_5260	CP003268 (pSYSG_M)	complement(21810..22325)	516	hypothetical protein	similar to sll8025	AGF53685.1	0.960273	1.1127	8.71726	7	8.37095	8	9.69966	13
2216	rbcL	CP003265	2475681..2477093	1413	ribulose-1,5-bisphosphate carboxylase/oxygenase large subunit	similar to slr0009	AGF52483.1	1.31137	1.11156	1539.39	3385	2018.7	5283	1711.12	6280
1124	MYO_111370	CP003265	1243865..1244329	465	putative iojap protein	similar to slr1886	AGF51391.1	0.966071	1.11145	286.055	207	276.349	238	317.937	384
2923	MYO_129640	CP003265	complement(3281551..3282114)	564	hypothetical protein	similar to sll1338	AGF53190.1	1.342	1.11116	6103.44	5357	8190.8	8556	6781.9	9935
2171	tpi	CP003265	2420888..2421616	729	triosephosphate isomerase	similar to slr0783	AGF52438.1	1.19034	1.11091	42.3102	48	50.3635	68	47.003	89
2847	MYO_128860	CP003265	3194052..3195893	1842	serine proteinase	similar to slr0535	AGF53114.1	1.0723	1.11079	109.889	315	117.834	402	122.064	584
837	aroC	CP003265	complement(921204..922292)	1089	chorismate synthase	similar to sll1747	AGF51104.1	1.16513	1.11041	44.2553	75	51.5632	104	49.1416	139
1263	dcoH	CP003265	complement(1392086..1392376)	291	pterin-4a-carbinolamine dehydratase	similar to ssl2296	AGF51530.1	0.93909	1.11018	75.0789	34	70.5058	38	83.3509	63
752	adk_2	CP003265	complement(831357..831920)	564	adenylate kinase	similar to sll1815	AGF51019.1	0.937529	1.10999	108.237	95	101.475	106	120.142	176
2785	MYO_128240	CP003265	complement(3113708..3113950)	243	hypothetical protein	similar to ssl1263	AGF53052.1	1.21635	1.10984	1110.64	420	1350.93	608	1232.64	778
3012	MYO_130600	CP003265	3396166..3396528	363	hypothetical protein	similar to slr1583	AGF53279.1	1.18343	1.10968	502.74	284	594.96	400	557.881	526
926	MYO_19370	CP003265	1021076..1021663	588	hypothetical protein	similar to slr1222	AGF51193.1	1.21368	1.10953	29.5065	27	35.8114	39	32.7382	50
403	MYO_14090	CP003265	complement(440712..442088)	1377	hypothetical protein	similar to sll0638	AGF50670.1	1.17011	1.10953	62.9987	135	73.7154	188	69.8986	250
796	MYO_18050	CP003265	875170..875634	465	hypothetical protein	similar to slr1195	AGF51063.1	0.933598	1.10953	37.3115	27	34.8339	30	41.398	50
2112	MYO_121400	CP003265	2343840..2344394	555	hypothetical protein	similar to slr0362	AGF52379.1	0.746879	1.10953	31.261	27	23.3482	24	34.6848	50
252	MYO_12560	CP003265	complement(279512..280087)	576	hypothetical protein	similar to sll1656	AGF50519.1	1.1117	1.10918	217.542	195	241.842	258	241.294	361
2882	MYO_129230	CP003265	complement(3233015..3234124)	1110	hypothetical protein	similar to sll0898	AGF53149.1	0.953627	1.10914	167.304	289	159.546	328	185.564	535
373	pyrC_1	CP003265	complement(399377..400702)	1326	dihydroorotase	similar to sll1018	AGF50640.1	1.2693	1.10905	22.7765	47	28.9101	71	25.2603	87
638	MYO_16470	CP003265	707691..708314	624	hypothetical protein	similar to slr1397	AGF50905.1	1.16681	1.10854	254.357	247	296.786	343	281.964	457
2127	MYO_121550	CP003265	2378310..2379020	711	hypothetical protein	similar to slr0379	AGF52394.1	1.0503	1.10842	18.0756	20	18.9847	25	20.0353	37
464	MYO_14710	CP003265	512717..514735	2019	hypothetical protein	similar to slr1056	AGF50731.1	1.0713	1.10842	12.7308	40	13.6386	51	14.111	74
1739	MYO_117610	CP003265	complement(1911245..1912582)	1338	hypothetical protein	similar to sll1103	AGF52006.1	1.57689	1.10801	35.0589	73	55.2839	137	38.8455	135
827	MYO_18360	CP003265	complement(909258..910649)	1392	hypothetical protein	similar to sll1967	AGF51094.1	0.98987	1.10801	33.6989	73	33.3575	86	37.3385	135
1833	livH_2	CP003265	2015573..2016433	861	high-affinity branched-chain amino acid transport permease protein	similar to slr0949	AGF52100.1	0.814777	1.10751	24.6288	33	20.0669	32	27.2765	61
2815	MYO_128540	CP003265	3152178..3153932	1755	hypothetical protein	similar to slr0031	AGF53082.1	1.0229	1.10711	67.3709	184	68.9137	224	74.5872	340
2353	pheS	CP003265	complement(2626539..2627534)	996	phenylalanyl-tRNA synthetase alpha chain	similar to sll0454	AGF52620.1	1.0749	1.10653	71.6136	111	76.9774	142	79.2423	205
1663	rnpA	CP003265	1825380..1825754	375	protein subunit of ribonuclease P	similar to slr1469	AGF51930.1	1.08625	1.10653	380.411	222	413.224	287	420.935	410
1956	MYO_119820	CP003265	2150200..2151201	1002	hypothetical protein	similar to slr0404	AGF52223.1	1.10883	1.1065	531.641	829	589.5	1094	588.261	1531
577	sqdB	CP003265	635874..637025	1152	sulfolipid biosynthesis protein SqdB	similar to slr1020	AGF50844.1	1.17207	1.10644	549.434	985	643.974	1374	607.915	1819
2718	MYO_127570	CP003265	3043145..3044533	1389	pre-B cell enhancing factor	similar to slr0788	AGF52985.1	1.68048	1.10611	6.01413	13	10.1066	26	6.6523	24
1441	MYO_114570	CP003265	1599128..1600252	1125	hypothetical protein	similar to slr1512	AGF51708.1	1.15263	1.10611	44.5527	78	51.353	107	49.2802	144
2392	MYO_124290	CP003265	complement(2669163..2671238)	2076	hypothetical protein	similar to sll0602	AGF52659.1	1.12463	1.10611	60.3586	195	67.8809	261	66.7633	360
453	MYO_14600	CP003265	495728..496108	381	hypothetical protein	similar to slr1046	AGF50720.1	1.03414	1.10611	21.9255	13	22.6741	16	24.2521	24
1921	MYO_119460	CP003265	complement(2114577..2115482)	906	hypothetical protein	similar to sll0265	AGF52188.1	0.969506	1.10611	9.22034	13	8.93918	15	10.1987	24
36	MYO_1360	CP003265	complement(47007..48017)	1011	hypothetical protein	similar to sll1401	AGF50303.1	0.872555	1.10611	16.5255	26	14.4194	27	18.279	48
189	MYO_11910	CP003265	complement(209527..209826)	300	hypothetical protein	similar to ssl2009	AGF50456.1	0.694813	1.10611	111.382	52	77.3894	43	123.201	96
1118	MYO_111310	CP003265	complement(1239783..1240661)	879	hypothetical protein	similar to sll1757	AGF51385.1	0.970094	1.10569	80.4147	110	78.0098	127	88.9139	203
1703	thrC_2	CP003265	complement(1872167..1873315)	1149	threonine synthase	similar to sll1172	AGF51970.1	0.998073	1.1056	101.226	181	101.031	215	111.915	334
246	pleD_1	CP003265	271600..273357	1758	PleD	similar to slr1798	AGF50513.1	1.10139	1.10518	54.0972	148	59.5823	194	59.787	273
2550	MYO_125880	CP003265	complement(2849122..2850612)	1491	hypothetical protein	similar to sll0827	AGF52817.1	0.95227	1.10509	19.394	45	18.4683	51	21.432	83
992	rps1_1	CP003265	1096732..1097718	987	30S ribosomal protein S1	similar to slr1356	AGF51259.1	0.930225	1.10474	504.564	775	469.358	858	557.414	1429
2508	MYO_125460	CP003265	complement(2804479..2806200)	1722	flavoprotein	similar to sll0550	AGF52775.1	1.23888	1.10449	233.6	626	289.403	923	258.009	1154
192	MYO_11940	CP003265	211734..213068	1335	hypothetical protein	similar to slr1107	AGF50459.1	1.43335	1.1043	24.5483	51	35.1862	87	27.1087	94
194	ccmN	CP003265	complement(215504..216229)	726	carbon dioxide concentrating mechanism protein CcmN, putative carboxysome assembly protein	similar to sll1032	AGF50461.1	0.914377	1.1043	90.2808	102	82.5507	111	99.6974	188
990	ycf9	CP003265	complement(1094903..1095226)	324	Ycf9	similar to sll1281	AGF51257.1	1.16138	1.10418	378.809	191	439.94	264	418.273	352
2463	metH	CP003265	2748294..2751881	3588	5-methyltetrahydrofolate--homocysteine methyltransferase	similar to slr0212	AGF52730.1	1.13232	1.10414	37.6096	210	42.5862	283	41.5261	387
1270	MYO_112840	CP003265	complement(1398958..1399371)	414	glutathione S-transferase	similar to sll1147	AGF51537.1	0.840239	1.10414	108.65	70	91.2919	70	119.964	129
560	MYO_15670	CP003265	complement(616892..617689)	798	hypothetical protein	similar to sll1835	AGF50827.1	1.42398	1.10369	76.4984	95	108.932	161	84.4302	175
360	MYO_13660	CP003265	386177..386719	543	hypothetical protein	similar to slr1084	AGF50627.1	1.35617	1.10369	67.4539	57	91.4792	92	74.4478	105
1264	MYO_112780	CP003265	complement(1392408..1394225)	1818	hypothetical protein	similar to sll1151	AGF51531.1	1.01443	1.1033	28.9836	82	29.4019	99	31.9776	151
565	MYO_15720	CP003265	621063..621749	687	hypothetical protein	similar to slr1918	AGF50832.1	1.01011	1.10312	259.092	277	261.711	333	285.809	510
1694	MYO_117160	CP003265	1862708..1863472	765	hypothetical protein	similar to slr1272	AGF51961.1	1.68593	1.10297	517.429	616	872.351	1236	570.708	1134
1006	glnH/glnP	CP003265	complement(1114084..1115676)	1593	glutamine-binding periplasmic protein/glutamine transport system permease protein	similar to sll1270	AGF51273.1	1.17939	1.10242	110.93	275	130.83	386	122.292	506
1957	MYO_119830	CP003265	2151473..2151766	294	hypothetical protein	similar to ssr0657	AGF52224.1	1.0419	1.10242	109.283	50	113.862	62	120.477	92
2905	valS	CP003265	3261558..3264290	2733	valyl-tRNA synthetase	similar to slr0557	AGF53172.1	1.00904	1.102	52.6672	224	53.1431	269	58.039	412
1961	pyrC_2	CP003265	2154710..2155738	1029	dihydroorotase	similar to slr0406	AGF52228.1	1.1926	1.10165	19.3588	31	23.0872	44	21.3266	57
2036	MYO_120630	CP003265	2250436..2251074	639	hypothetical protein	similar to slr1949	AGF52303.1	1.05707	1.10165	93.522	93	98.8597	117	103.029	171
1007	MYO_110200	CP003265	complement(1116015..1116284)	270	hypothetical protein	similar to ssl2501	AGF51274.1	1.23111	1.10159	752.065	316	925.873	463	828.467	581
1494	MYO_115110	CP003265	1649358..1650827	1470	hypothetical protein	similar to slr1322	AGF51761.1	1.08173	1.10151	184.033	421	199.075	542	202.715	774
2424	proA_2	CP003265	complement(2706352..2707653)	1302	gamma-glutamyl phosphate reductase	similar to sll0373	AGF52691.1	0.772111	1.10113	36.5218	74	28.1989	68	40.2152	136
1409	glpX	CP003265	1558856..1559893	1038	GlpX protein	similar to slr2094	AGF51676.1	1.20997	1.10104	686.54	1109	830.696	1597	755.909	2038
2929	MYO_129710	CP003265	3290346..3291773	1428	hypothetical protein	similar to slr1431	AGF53196.1	0.990049	1.10075	58.0488	129	57.4711	152	63.8973	237
1460	lap	CP003265	complement(1616596..1618122)	1527	leucine aminopeptidase	similar to sll2001	AGF51727.1	1.05459	1.10047	41.24	98	43.4911	123	45.3833	180
2247	gidA_1	CP003265	complement(2514081..2515451)	1371	glucose inhibited division protein A	similar to sll0204	AGF52514.1	1.00138	1.0998	34.2151	73	34.2623	87	37.6296	134
1907	MYO_119320	CP003265	complement(2093886..2094842)	957	sterol-C-methyltransferase	similar to sll0418	AGF52174.1	0.91469	1.09969	53.0453	79	48.52	86	58.3336	145
1755	nrdA	CP003265	1926792..1929095	2304	ribonucleotide reductase subunit alpha	similar to slr1164	AGF52022.1	0.882076	1.09884	67.215	241	59.2888	253	73.8588	442
3454	MYO_3130	CP003269 (pSYSX_M)	11315..13507	2193	hypothetical protein	similar to slr6012	AGF53721.1	1.07299	1.09871	105.779	0	113.5	0	116.22	0
1825	MYO_118470	CP003265	complement(2007343..2008473)	1131	hypothetical protein	similar to sll0914	AGF52092.1	2.1006	1.09843	6.8179	12	14.3216	30	7.48898	22
30	pchR_2	CP003265	38644..39636	993	regulatory protein PchR	similar to slr1489	AGF50297.1	1.82052	1.09843	3.8827	6	7.06852	13	4.26487	11
205	MYO_12070	CP003265	227123..227899	777	hypothetical protein	similar to slr1773	AGF50472.1	1.61046	1.09843	9.92412	12	15.9824	23	10.9009	22
174	MYO_11760	CP003265	190033..190818	786	hypothetical protein	similar to slr1094	AGF50441.1	1.37706	1.09843	29.4315	36	40.5288	59	32.3284	66
1598	MYO_116170	CP003265	1754061..1754381	321	hypothetical protein	similar to slr1957	AGF51865.1	1.12856	1.09843	204.186	102	230.436	137	224.284	187
2224	MYO_122570	CP003265	2482913..2483461	549	hypothetical protein	similar to slr0016	AGF52491.1	1.01529	1.09843	28.0912	24	28.5207	29	30.8562	44
862	MYO_18720	CP003265	complement(947166..948998)	1833	ABC transporter	similar to sll1725	AGF51129.1	0.960273	1.09843	14.7238	42	14.1388	48	16.173	77
297	MYO_13020	CP003265	complement(328006..329181)	1176	aspartate transaminase	similar to sll0938	AGF50564.1	0.793559	1.09843	9.83551	18	7.80506	17	10.8036	33
1928	MYO_119530	CP003265	2122234..2123514	1281	hypothetical protein	similar to slr0286	AGF52195.1	0.560159	1.09843	3.00977	6	1.68595	4	3.30603	11
3228	MYO_2690	CP003266 (pSYSM_M)	complement(69121..69348)	228	hypothetical protein	similar to ssl5068	AGF53495.1	0.14004	1.09843	16.9102	5	2.3681	1	18.5746	10
1023	MYO_110360	CP003265	1138357..1140129	1773	secreted protein MPB70 precursor	similar to slr0880	AGF51290.1	0.962773	1.09843	17.3966	48	16.749	55	19.1089	88
2732	MYO_127710	CP003265	complement(3060817..3062193)	1377	sensory transduction histidine kinase	similar to sll0790	AGF52999.1	0.14004	1.09843	2.79994	2	0.392103	1	3.07554	6
440	gltB_1	CP003265	complement(477770..482422)	4653	glutamate synthase (ferredoxin)	similar to sll1502	AGF50707.1	1.05468	1.09831	112.553	815	118.707	1023	123.618	1494
1769	MYO_117910	CP003265	1941392..1942783	1392	hypothetical protein	similar to slr1173	AGF52036.1	1.01197	1.0977	63.2431	137	63.9999	165	69.422	251
633	MYO_16420	CP003265	700845..703769	2925	sensory transduction histidine kinase	similar to slr1393	AGF50900.1	1.23433	1.09755	24.8247	113	30.642	166	27.2463	207
866	MYO_18760	CP003265	953407..954111	705	OmpR subfamily	similar to slr1837	AGF51133.1	1.12347	1.09731	81.1209	89	91.1365	119	89.0146	163
2088	dnaK_2	CP003265	complement(2309931..2311841)	1911	DnaK protein	similar to sll0170	AGF52355.1	1.08864	1.09702	547.09	1627	595.586	2108	600.168	2979
2502	MYO_125390	CP003265	complement(2798408..2800303)	1896	hypothetical protein	similar to sll0556	AGF52769.1	0.710971	1.09689	22.0296	65	15.6624	55	24.1641	119
2524	MYO_125620	CP003265	2819369..2819722	354	hypothetical protein	similar to slr0579	AGF52791.1	1.03962	1.09674	107.098	59	111.341	73	117.458	108
544	MYO_15510	CP003265	598564..599415	852	hypothetical protein	similar to slr2053	AGF50811.1	1.08234	1.09674	44.4984	59	48.1624	76	48.803	108
1256	MYO_112700	CP003265	complement(1385048..1385389)	342	hypothetical protein	similar to sll1155	AGF51523.1	1.34755	1.09655	298.746	159	402.577	255	327.589	291
3067	dapF	CP003265	3467094..3467933	840	diaminopimelate epimerase	similar to slr1665	AGF53334.1	1.00829	1.09558	80.3233	105	80.9889	126	88.0004	192
1910	sms	CP003265	2097731..2099248	1518	sms protein	similar to slr0448	AGF52177.1	0.984279	1.09558	14.8159	35	14.583	41	16.232	64
1204	ndh_1	CP003265	1329400..1330614	1215	NADH dehydrogenase	similar to slr1743	AGF51471.1	0.848241	1.09558	55.5322	105	47.1047	106	60.8398	192
2003	MYO_120290	CP003265	2218915..2219466	552	hypothetical protein	similar to slr1929	AGF52270.1	1.15895	1.09499	67.5182	58	78.2502	80	73.9315	106
1530	gcp	CP003265	1686682..1687728	1047	putative glycoprotease	similar to slr0807	AGF51797.1	1.06495	1.09379	52.7817	86	56.2101	109	57.7319	157
3155	MYO_132030	CP003265	3564113..3565066	954	hypothetical protein	similar to slr0606	AGF53422.1	1.03197	1.09374	100.362	149	103.571	183	109.77	272
2046	glgA_2	CP003265	complement(2262480..2263913)	1434	glycogen synthase	similar to sll0945	AGF52313.1	1.22702	1.09367	56.4616	126	69.2792	184	61.7506	230
822	MYO_18310	CP003265	complement(905230..906444)	1215	hypothetical protein	similar to sll1971	AGF51089.1	1.09231	1.09344	21.1551	40	23.108	52	23.1318	73
690	MYO_16990	CP003265	complement(763802..766039)	2238	cation-transporting ATPase E1-E2 ATPase	similar to sll1920	AGF50957.1	1.33038	1.09288	31.0096	108	41.2544	171	33.8898	197
356	MYO_13620	CP003265	384050..384247	198	hypothetical protein	similar to ssr1768	AGF50623.1	1.23564	1.09256	55.1716	17	68.1725	25	60.278	31
1	sds	CP003265	join(3569362..3569561,1..772)	972	solanesyl diphosphate synthase	similar to slr0611	AGF50268.1	1.22329	1.09256	44.9546	68	54.9925	99	49.1154	124
2249	gidA_2	CP003265	complement(2519097..2521004)	1908	glucose inhibited division protein A	similar to sll0202	AGF52516.1	1.15091	1.09256	40.0775	119	46.1258	163	43.7869	217
2594	MYO_126320	CP003265	2901799..2902503	705	hypothetical protein	similar to slr0498	AGF52861.1	0.93909	1.09256	15.495	17	14.5512	19	16.9292	31
2384	MYO_124210	CP003265	2659227..2660552	1326	sensory transduction histidine kinase	similar to slr0640	AGF52651.1	0.840239	1.09256	8.23829	17	6.92213	17	9.00079	31
1313	MYO_113280	CP003265	complement(1449788..1450987)	1200	hypothetical protein	similar to sll1902	AGF51580.1	1.3345	1.09256	9.10331	17	12.1483	27	9.94588	31
1673	pyrB	CP003265	1832977..1833972	996	aspartate carbamoyltransferase	similar to slr1476	AGF51940.1	1.09556	1.09236	116.775	181	127.934	236	127.561	330
1294	MYO_113090	CP003265	complement(1427798..1428541)	744	hypothetical protein	similar to sll1949	AGF51561.1	1.66452	1.09211	272.927	316	454.293	626	298.066	576
927	uvrD	CP003265	complement(1021933..1024314)	2382	DNA helicase II	similar to sll1143	AGF51194.1	1.10248	1.09143	42.3535	157	46.6939	206	46.2261	286
2674	MYO_127130	CP003265	2990070..2990591	522	hypothetical protein	similar to slr0111	AGF52941.1	0.870247	1.0913	34.4683	28	29.9959	29	37.6151	51
586	MYO_15940	CP003265	complement(643051..643881)	831	esterase	similar to sll0992	AGF50853.1	1.31679	1.09098	51.809	67	68.2217	105	56.5225	122
611	ackA	CP003265	complement(676547..677788)	1242	acetate kinase	similar to sll1299	AGF50878.1	1.2065	1.09075	20.1778	39	24.3445	56	22.009	71
1812	pknA_3	CP003265	1990019..1991743	1725	eukariotic protein kinase	similar to slr1697	AGF52079.1	1.01165	1.09044	93.1285	250	94.2132	301	101.551	455
954	grxC_1	CP003265	1050467..1050733	267	glutaredoxin 3	similar to ssr2061	AGF51221.1	1.02509	1.09044	240.669	100	246.708	122	262.436	182
237	msrA_2	CP003265	263321..263965	645	peptide methionine sulfoxide reductase	similar to slr1795	AGF50504.1	1.0161	1.0903	171.356	172	174.116	208	186.83	313
1790	putA	CP003265	complement(1964615..1967587)	2973	delta-1-pyrroline-5-carboxylate dehydrogenase	similar to sll1561	AGF52057.1	1.2773	1.08957	53.6029	248	68.4669	377	58.4042	451
3026	MYO_130740	CP003265	3410924..3411616	693	hypothetical protein	similar to slr0748	AGF53293.1	1.37494	1.08935	20.3996	22	28.0481	36	22.2223	40
2615	MYO_126530	CP003265	complement(2921071..2921835)	765	hypothetical protein	similar to sll0477	AGF52882.1	0.8657	1.08935	27.7194	33	23.9967	34	30.1962	60
2467	MYO_125040	CP003265	2757703..2757900	198	hypothetical protein	similar to ssr1513	AGF52734.1	0.840239	1.08935	35.6993	11	29.9959	11	38.8891	20
473	MYO_14800	CP003265	complement(523118..523900)	783	ABC transporter	similar to sll1001	AGF50740.1	0.789315	1.08935	27.0822	33	21.3764	31	29.502	60
2831	nrtD_3	CP003265	3172679..3173527	849	nitrate transport protein NrtD	similar to slr0044	AGF53098.1	0.763853	1.08935	8.32562	11	6.35955	10	9.06953	20
2799	MYO_128380	CP003265	complement(3129845..3130552)	708	hypothetical protein	similar to sll0740	AGF53066.1	1.83325	1.08935	9.98369	11	18.3026	24	10.8758	20
834	MYO_18430	CP003265	917471..919669	2199	hypothetical protein	similar to slr2077	AGF51101.1	1.45132	1.08935	3.2144	11	4.66512	19	3.50161	20
1160	MYO_111730	CP003265	1284575..1285372	798	hypothetical protein	similar to slr1809	AGF51427.1	1.22217	1.08935	62.004	77	75.7791	112	67.5442	140
982	MYO_19940	CP003265	complement(1087427..1088845)	1419	hypothetical protein	similar to sll1352	AGF51249.1	0.725661	1.08935	9.96259	22	7.22946	19	10.8528	40
3362	MYO_4730	CP003267 (pSYSA_M)	complement(64537..65577)	1041	hypothetical protein	similar to sll7075	AGF53629.1	1.26036	1.08844	37.0367	60	46.6795	90	40.3124	109
2606	MYO_126440	CP003265	complement(2913121..2914344)	1224	hypothetical protein	similar to sll0482	AGF52873.1	1.07831	1.08844	31.4994	60	33.9659	77	34.2853	109
195	ccmM	CP003265	complement(216264..218327)	2064	carbon dioxide concentrating mechanism protein CcmM	similar to sll1031	AGF50462.1	1.22657	1.0883	178.081	572	218.429	835	193.807	1039
1947	MYO_119720	CP003265	complement(2142247..2143080)	834	hypothetical protein	similar to sll0360	AGF52214.1	1.21749	1.08824	37.7539	49	45.9649	71	41.0853	89
3279	MYO_21200	CP003266 (pSYSM_M)	108733..109503	771	hypothetical protein	similar to slr5119	AGF53546.1	1.32635	1.0881	217.529	251	288.521	399	236.694	462
614	MYO_16230	CP003265	679192..679680	489	hypothetical protein	similar to slr1383	AGF50881.1	0.777999	1.08733	70.9605	54	55.2072	50	77.1578	98
2211	hemL	CP003265	complement(2469221..2470456)	1236	glutamate-1-semialdehyde 2,1-aminomutase	similar to sll0017	AGF52478.1	0.80559	1.08711	151.289	291	121.877	279	164.467	528
1731	mrcA	CP003265	complement(1902494..1904446)	1953	penicillin-binding protein 1B	similar to sll1434	AGF51998.1	1.03482	1.08687	93.7723	285	97.0374	351	101.918	517
2188	MYO_122170	CP003265	2439325..2440575	1251	hypothetical protein	similar to slr0351	AGF52455.1	0.817832	1.08645	38.5244	75	31.5065	73	41.8547	136
2228	MYO_122620	CP003265	2487593..2490271	2679	hypothetical protein	similar to slr0019	AGF52495.1	1.36539	1.08595	7.67554	32	10.4801	52	8.33524	58
785	MYO_17940	CP003265	complement(852550..852936)	387	transposase	similar to sll1791	AGF51052.1	1.78551	1.08595	26.5669	12	47.4354	24	28.8503	23
3235	MYO_2760	CP003266 (pSYSM_M)	complement(73728..74147)	420	hypothetical protein	similar to sll5075	AGF53502.1	1.36539	1.08595	24.4795	16	33.424	26	26.5835	29
942	bchB	CP003265	1041961..1042212	252	protochlorophillide reductase 57 kD subunit	similar to ssr2049	AGF51209.1	0.892753	1.08595	40.7992	16	36.4236	17	44.3058	29
1033	aat	CP003265	complement(1149126..1149722)	597	Leu/Phe-tRNA-protein transferase	similar to sll0869	AGF51300.1	0.840239	1.08595	17.2218	16	14.4704	16	18.7019	29
1722	MYO_117440	CP003265	1891387..1893894	2508	nitrogen assimilation regulatory protein	similar to slr1529	AGF51989.1	1.19796	1.08558	25.8777	101	31.0005	144	28.0922	183
1267	MYO_112810	CP003265	1395681..1395995	315	hypothetical protein	similar to slr1253	AGF51534.1	1.29721	1.08529	465.11	228	603.346	352	504.78	413
1622	MYO_116410	CP003265	complement(1780526..1781824)	1299	sensory transduction histidine kinase	similar to sll1888	AGF51889.1	1.07012	1.08524	52.4359	106	56.1124	135	56.9056	192
546	dnaK_1	CP003265	complement(600444..602810)	2367	DnaK protein	similar to sll1932	AGF50813.1	0.94725	1.08524	57.5532	212	54.5173	239	62.4591	384
2210	cbbA	CP003265	complement(2467858..2468937)	1080	fructose-1,6-bisphosphate aldolase	similar to sll0018	AGF52477.1	1.34553	1.08499	1922.41	3231	2586.65	5174	2085.78	5851
2542	moxR	CP003265	2840040..2840951	912	MoxR protein	similar to slr0835	AGF52809.1	1.33984	1.08494	26.0699	37	34.9294	59	28.2841	67
1732	MYO_117540	CP003265	complement(1904639..1906213)	1575	hypothetical protein	similar to sll1433	AGF51999.1	1.36207	1.08477	38.7592	95	52.7928	154	42.0446	172
264	sufA	CP003265	291626..292708	1083	iron transport protein	similar to slr1295	AGF50531.1	0.941067	1.08445	59.334	100	55.8372	112	64.3447	181
2629	prsA	CP003265	complement(2935898..2936899)	1002	ribose-phosphate pyrophosphokinase	similar to sll0469	AGF52896.1	1.1639	1.08442	502.782	784	585.189	1086	545.227	1419
280	MYO_12840	CP003265	309649..312171	2523	regulatory components of sensory transduction system	similar to slr1305	AGF50547.1	1.36039	1.08416	10.697	42	14.5521	68	11.5974	76
2284	MYO_123190	CP003265	2554082..2555587	1506	hypothetical protein	similar to slr0439	AGF52551.1	1.24035	1.08416	8.96037	21	11.114	31	9.71452	38
1289	MYO_113040	CP003265	complement(1418376..1418981)	606	hypothetical protein	similar to sll1954	AGF51556.1	0.960273	1.08416	66.8036	63	64.1496	72	72.4261	114
2457	ftrV	CP003265	2743202..2743429	228	ferredoxin-thioredoxin reductase, variable chain	similar to ssr0330	AGF52724.1	0.920261	1.08416	118.371	42	108.932	46	128.334	76
2153	livG	CP003265	complement(2404834..2405955)	1122	high-affinity branched-chain amino acid transport ATP-binding protein	similar to sll0764	AGF52420.1	1.12032	1.08416	24.0541	42	26.9482	56	26.0785	76
61	MYO_1610	CP003265	complement(70944..74042)	3099	hypothetical protein	similar to sll1060	AGF50328.1	1.20758	1.08388	41.2632	199	49.8286	286	44.7243	360
3194	MYO_2350	CP003266 (pSYSM_M)	complement(34001..34624)	624	hypothetical protein	similar to sll5034	AGF53461.1	1.02559	1.08374	70.0255	68	71.8171	83	75.8898	123
2788	tgt	CP003265	3115659..3116783	1125	transfer RNA-guanine transglycosylase	similar to slr0713	AGF53055.1	0.976159	1.08374	38.8408	68	37.9148	79	42.0935	123
3086	ski2	CP003265	3489976..3492996	3021	antiviral protein	similar to slr0451	AGF53353.1	1.19779	1.08356	49.9861	235	59.8726	335	54.1628	425
251	MYO_12550	CP003265	278494..279561	1068	hypothetical protein	similar to slr1800	AGF50518.1	0.807922	1.08307	15.6435	26	12.6387	25	16.943	47
1406	MYO_114220	CP003265	complement(1556896..1557120)	225	hypothetical protein	similar to ssl3769	AGF51673.1	0.958494	1.0829	385.552	135	369.549	154	417.513	244
589	chlI	CP003265	657764..658837	1074	Mg chelatase subunit ChlI	similar to slr1030	AGF50856.1	0.994411	1.08286	65.216	109	64.8515	129	70.6195	197
613	MYO_16220	CP003265	678797..679012	216	hypothetical protein	similar to ssr2315	AGF50880.1	0.975761	1.08232	92.2231	31	89.9877	36	99.8153	56
2178	MYO_122070	CP003265	2428359..2428766	408	hypothetical protein	similar to slr0345	AGF52445.1	0.948656	1.08232	97.648	62	92.6344	70	105.687	112
390	MYO_13960	CP003265	complement(424796..425566)	771	hypothetical protein	similar to sll0647	AGF50657.1	1.39357	1.08138	34.1713	41	47.6199	68	36.9522	74
2317	gspE_1	CP003265	2587119..2589137	2019	general secretion pathway protein E	similar to slr0063	AGF52584.1	1.17191	1.08116	169.32	532	198.428	742	183.062	960
2638	MYO_126760	CP003265	2945831..2947087	1257	hypothetical protein	similar to slr0616	AGF52905.1	0.639312	1.08106	23.5155	46	15.0337	35	25.4218	83
542	MYO_15490	CP003265	597093..597989	897	hypothetical protein	similar to slr2052	AGF50809.1	1.12585	1.08106	362.485	506	408.105	678	391.869	913
691	fabD	CP003265	766228..767109	882	malonyl coenzyme A-acyl carrier protein transacylase	similar to slr2023	AGF50958.1	0.757862	1.08081	37.1564	51	28.1594	46	40.1589	92
2193	MYO_122220	CP003265	complement(2443662..2444606)	945	hypothetical protein	similar to sll0314	AGF52460.1	1.00499	1.08081	34.6793	51	34.8524	61	37.4816	92
2946	fus_4	CP003265	3310935..3313022	2088	elongation factor EF-G	similar to slr1463	AGF53213.1	1.23532	1.0808	284.055	923	350.9	1357	307.006	1665
526	divK	CP003265	579148..579696	549	cell division response regulator DivK	similar to slr2041	AGF50793.1	1.15705	1.08042	71.3985	61	82.6117	84	77.1406	109
1262	cyp_1	CP003265	1391442..1391957	516	peptidyl-prolyl cis-trans isomerase	similar to slr1251	AGF51529.1	1.1295	1.08042	75.9647	61	85.8022	82	82.074	110
2944	MYO_129860	CP003265	complement(3306798..3308699)	1902	hypothetical protein	similar to sll1365	AGF53211.1	1.06135	1.08004	25.6764	76	27.2518	96	27.7315	137
2979	MYO_130260	CP003265	3359325..3360434	1110	hypothetical protein	similar to slr1557	AGF53246.1	1.20737	1.07954	128.517	222	155.168	319	138.739	400
75	MYO_1750	CP003265	complement(87536..87910)	375	hypothetical protein	similar to sll1052	AGF50342.1	1.68048	1.07846	8.56782	5	14.398	10	9.24004	9
1721	MYO_117430	CP003265	complement(1890947..1891294)	348	hypothetical protein	similar to sll1442	AGF51988.1	1.17633	1.07846	18.4651	10	21.7212	14	19.9139	18
22	pcrR	CP003265	complement(27990..29030)	1041	regulatory protein PcrR	similar to sll1408	AGF50289.1	1.00829	1.07846	3.08639	5	3.11197	6	3.32855	9
1167	MYO_111800	CP003265	1290685..1291149	465	hypothetical protein	similar to slr1814	AGF51434.1	1.25272	1.07846	76.0049	55	95.2128	82	81.9681	99
513	rub	CP003265	568643..568990	348	rubredoxin	similar to slr2033	AGF50780.1	1.23795	1.07846	276.977	150	342.884	221	298.708	270
3262	MYO_21030	CP003266 (pSYSM_M)	96554..97156	603	hypothetical protein	similar to slr5102	AGF53529.1	1.12032	1.07846	15.9847	15	17.908	20	17.2389	27
2096	MYO_121240	CP003265	2324280..2325296	1017	transposase	similar to slr0180	AGF52363.1	1.09231	1.07846	6.31845	1	6.90171	4	6.81419	1
3550	MYO_31090	CP003269 (pSYSX_M)	102911..103720	810	hypothetical protein	similar to slr6108	AGF53817.1	1.00829	1.07846	3.96659	5	3.99945	6	4.2778	9
3177	MYO_2180	CP003266 (pSYSM_M)	23255..23572	318	hypothetical protein	similar to slr5017	AGF53444.1	1.00829	1.07846	10.1036	5	10.1873	6	10.8963	9
678	MYO_16870	CP003265	750882..751175	294	hypothetical protein	similar to ssr3409	AGF50945.1	0.95227	1.07846	32.785	15	31.2202	17	35.3573	27
1180	MYO_111930	CP003265	1303441..1304913	1473	hypothetical protein	similar to slr1820	AGF51447.1	0.924262	1.07846	8.72487	20	8.06407	22	9.40941	36
3382	MYO_4930	CP003267 (pSYSA_M)	91115..91630	516	hypothetical protein	similar to slr7095	AGF53649.1	0.903256	1.07846	49.8129	40	44.9938	43	53.7212	72
1750	MYO_117720	CP003265	complement(1921639..1921941)	303	transposase	similar to sll1094	AGF52017.1	0.672191	1.07846	10.6037	5	7.12774	4	11.4357	9
3533	MYO_3920	CP003269 (pSYSX_M)	86436..86870	435	hypothetical protein	similar to slr6091	AGF53800.1	0.336095	1.07846	7.38606	5	2.48242	2	7.96555	9
2437	MYO_124740	CP003265	2721916..2722371	456	RNA-binding protein	similar to slr0193	AGF52704.1	1.34173	1.07819	625.677	444	839.491	709	674.597	799
2266	groEL-2	CP003265	complement(2536267..2537925)	1659	60kD chaperonin 2	similar to sll0416	AGF52533.1	1.03599	1.07803	108.066	279	111.956	344	116.498	502
2012	MYO_120380	CP003265	complement(2225712..2227595)	1884	hypothetical protein	similar to sll1858	AGF52279.1	0.932705	1.07789	71.2848	209	66.4877	232	76.8369	376
705	MYO_17140	CP003265	781308..782666	1359	sigma factor SibG regulation protein RsbU	similar to slr2031	AGF50972.1	1.08031	1.07768	72.817	154	78.6647	198	78.4735	277
2966	speA_2	CP003265	3340125..3342212	2088	arginine decarboxylase	similar to slr0662	AGF53233.1	1.31572	1.07753	39.7	129	52.2342	202	42.778	232
525	gyrA_1	CP003265	complement(576436..579270)	2835	DNA gyrase A subunit	similar to sll1941	AGF50792.1	0.81023	1.07703	19.0396	84	15.4265	81	20.5063	151
2143	MYO_121710	CP003265	2394030..2394710	681	hypothetical protein	similar to slr0773	AGF52410.1	1.15685	1.07672	65.1079	69	75.3201	95	70.1031	124
3083	MYO_131310	CP003265	complement(3486105..3487592)	1488	hypothetical protein	similar to sll0445	AGF53350.1	1.09092	1.07581	78.1641	181	85.2706	235	84.0898	325
2469	MYO_125060	CP003265	complement(2759382..2760221)	840	hypothetical protein	similar to sll0886	AGF52736.1	1.585	1.07573	33.6593	44	53.3498	83	36.2085	79
1730	pet112	CP003265	complement(1900906..1902465)	1560	PET112 protein	similar to sll1435	AGF51997.1	1.12142	1.07563	104.626	254	117.33	339	112.539	456
1865	MYO_118870	CP003265	2045430..2045804	375	hypothetical protein	similar to slr1634	AGF52132.1	1.01762	1.07553	35529.1	20734	36154.9	25111	38212.7	37220
3473	MYO_3320	CP003269 (pSYSX_M)	27957..31322	3366	hypothetical protein	similar to slr6031	AGF53740.1	1.03414	1.07539	7.4453	39	7.69948	47	8.00657	70
828	ilvA	CP003265	911012..912538	1527	L-threonine deaminase	similar to slr2072	AGF51095.1	1.23564	1.07493	28.6155	68	35.3586	100	30.7598	122
935	prfC	CP003265	1033557..1035200	1644	peptide-chain-release factor 3	similar to slr1228	AGF51202.1	1.03869	1.07485	77.7827	199	80.7919	246	83.6044	357
1220	psbC	CP003265	complement(1345944..1347326)	1383	photosystem II CP43 protein	similar to sll0851	AGF51487.1	1.10543	1.07398	5968.2	12845	6597.41	16899	6409.74	23025
1365	dfp	CP003265	complement(1512599..1513807)	1209	pantothenate metabolism flavoprotein	similar to sll0250	AGF51632.1	1.31287	1.07347	25.5121	48	33.4942	75	27.3864	86
895	MYO_19050	CP003265	984879..985877	999	hypothetical protein	similar to slr1547	AGF51162.1	0.938266	1.07347	77.1876	120	72.4225	134	82.8582	215
199	gltD	CP003265	complement(219979..221463)	1485	NADH-glutamate synthase small subunit	similar to sll1027	AGF50466.1	1.02991	1.07315	205.109	474	211.244	581	220.112	849
1197	MYO_112100	CP003265	complement(1323305..1323874)	570	membrane protein	similar to sll1621	AGF51464.1	1.21328	1.07304	523.088	464	634.65	670	561.292	831
564	MYO_15710	CP003265	620062..620970	909	hypothetical protein	similar to slr1917	AGF50831.1	0.972654	1.07296	246.714	349	239.967	404	264.715	625
1551	MYO_115690	CP003265	1704337..1705692	1356	hypothetical protein	similar to slr0818	AGF51818.1	1.44599	1.07288	20.377	43	29.465	74	21.8622	77
2174	MYO_122030	CP003265	complement(2423564..2425054)	1491	hypothetical protein	similar to sll0325	AGF52441.1	0.977022	1.07288	18.532	43	18.1062	50	19.8827	77
1188	MYO_112010	CP003265	complement(1313379..1314533)	1155	hypothetical protein	similar to sll1628	AGF51455.1	0.935104	1.07266	34.4938	62	32.2553	69	37.0002	111
449	MYO_14560	CP003265	491108..491551	444	CheY subfamily	similar to slr1042	AGF50716.1	1.05226	1.0723	309.715	214	325.901	268	332.107	383
1408	MYO_114240	CP003265	complement(1558191..1558619)	429	hypothetical protein	similar to sll1979	AGF51675.1	1.06509	1.07171	106.349	71	113.271	90	113.975	127
529	MYO_15360	CP003265	complement(581020..581664)	645	hypothetical protein	similar to sll1939	AGF50796.1	1.48333	1.07109	178.33	179	264.522	316	191.009	320
3394	MYO_520	CP003268 (pSYSG_M)	complement(1920..2966)	1047	hypothetical protein	similar to sll8001	AGF53661.1	1.53176	1.07104	69.3527	113	106.232	206	74.2792	202
502	MYO_15090	CP003265	554764..555108	345	hypothetical protein	similar to slr1847	AGF50769.1	1.17991	1.07081	87.5408	47	103.29	66	93.7395	84
2545	fus_3	CP003265	complement(2842448..2844457)	2010	elongation factor EF-G	similar to sll0830	AGF52812.1	1.05707	1.07073	49.5527	155	52.3809	195	53.0575	277
2472	MYO_125090	CP003265	2762822..2766034	3213	endo-1,4-beta-glucanase	similar to slr0897	AGF52739.1	1.06044	1.07019	28.9994	145	30.7521	183	31.035	259
2873	ssb	CP003265	3225279..3225644	366	single-stranded DNA-binding protein	similar to slr0925	AGF53140.1	1.33322	1.07006	475.795	271	634.34	430	509.128	484
988	MYO_110000	CP003265	complement(1093281..1094150)	870	hypothetical protein	similar to sll1348	AGF51255.1	1.38039	1.0699	10.3405	14	14.2739	23	11.0633	25
3341	MYO_4520	CP003267 (pSYSA_M)	42659..43231	573	hypothetical protein	similar to slr7054	AGF53608.1	1.23035	1.0699	31.4004	28	38.6335	41	33.5953	50
2027	MYO_120540	CP003265	complement(2240517..2240996)	480	hypothetical protein	similar to sll1845	AGF52294.1	1.16033	1.0699	56.2263	42	65.2411	58	60.1565	75
2890	clpX	CP003265	complement(3241348..3242685)	1338	ATP-dependent protease ATPase subunit	similar to sll0535	AGF53157.1	1.02029	1.0699	87.4072	182	89.1806	221	93.5169	325
1814	ppc	CP003265	complement(1992616..1995720)	3105	phosphoenolpyruvate carboxylase	similar to sll0920	AGF52081.1	1.09769	1.06978	74.2959	359	81.5541	469	79.4802	641
47	glgA_1	CP003265	complement(57340..58815)	1476	glycogen (starch) synthase	similar to sll1393	AGF50314.1	1.12516	1.06975	125.818	289	141.566	387	134.594	516
748	rps11	CP003265	complement(829849..830241)	393	30S ribosomal protein S11	similar to sll1817	AGF51015.1	1.12939	1.06973	403.865	247	456.121	332	432.025	441
1146	cefD	CP003265	1269539..1270744	1206	isopenicillin N epimerase	similar to slr2143	AGF51413.1	1.05442	1.06906	27.1741	51	28.6528	64	29.0507	91
316	MYO_13220	CP003265	complement(348384..348734)	351	hypothetical protein	similar to sll0922	AGF50583.1	0.940159	1.06874	338.685	185	318.418	207	361.967	330
2988	MYO_130360	CP003265	3369769..3370956	1188	hypothetical protein	similar to slr1566	AGF53255.1	0.817529	1.06874	20.0132	37	16.3614	36	21.389	66
2635	MYO_126730	CP003265	complement(2941540..2942157)	618	transcriptional regulatory protein	similar to sll0594	AGF52902.1	1.15817	1.06874	38.472	37	44.557	51	41.1167	66
2448	MYO_124850	CP003265	complement(2732690..2732866)	177	hypothetical protein	similar to ssl0352	AGF52715.1	0.908366	1.06874	134.326	37	122.017	40	143.56	66
2287	gltA	CP003265	complement(2557380..2558573)	1194	citrate synthase	similar to sll0401	AGF52554.1	1.04469	1.0685	181.367	337	189.472	419	193.791	601
1558	cfxE	CP003265	complement(1711033..1711725)	693	pentose-5-phosphate-3-epimerase	similar to sll0807	AGF51825.1	1.07557	1.0683	470.118	507	505.645	649	502.224	904
2106	umpS	CP003265	2333694..2334290	597	uridine 5'-monophosphate synthase	similar to slr0185	AGF52373.1	1.16903	1.06804	24.7563	23	28.9408	32	26.4407	41
2753	MYO_127920	CP003265	3081945..3085703	3759	hypothetical protein	similar to slr0697	AGF53020.1	0.968101	1.06804	7.86353	46	7.61269	53	8.39855	82
1926	MYO_119510	CP003265	2120914..2121264	351	hypothetical protein	similar to slr0284	AGF52193.1	1.34438	1.06789	311.224	170	418.404	272	332.352	303
726	MYO_17350	CP003265	811144..812448	1305	sensory transduction histidine kinase	similar to slr1147	AGF50993.1	1.09095	1.06783	61.0581	124	66.6116	161	65.1995	221
2501	natB	CP003265	2796918..2798282	1365	periplasmic binding protein of ABC transporter for natural amino acids	similar to slr0559	AGF52768.1	0.884932	1.06762	88.5028	188	78.319	198	94.4876	335
959	MYO_19700	CP003265	1055229..1055768	540	hypothetical protein	similar to slr1240	AGF51226.1	1.22097	1.06722	152.317	128	185.975	186	162.556	228
2436	MYO_124730	CP003265	2721343..2721687	345	hypothetical protein	similar to slr0192	AGF52703.1	1.12907	1.06722	59.6023	32	67.2951	43	63.609	57
1297	apcC	CP003265	1430167..1430370	204	phycobilisome LC linker polypeptide	similar to ssr3383	AGF51564.1	1.21467	1.06699	3852.37	1223	4679.36	1768	4110.46	2178
2864	MYO_129030	CP003265	complement(3215948..3216400)	453	hypothetical protein	similar to sll0498	AGF53131.1	1.2911	1.06677	116.318	82	150.178	126	124.084	146
1108	MYO_111210	CP003265	complement(1230741..1231145)	405	hypothetical protein	similar to sll1763	AGF51375.1	0.922213	1.06677	65.052	41	59.9918	45	69.3954	73
2200	MYO_122330	CP003265	2455520..2456644	1125	hypothetical protein	similar to slr0358	AGF52467.1	0.950217	1.06654	109.097	191	103.666	216	116.356	340
826	pmgA	CP003265	complement(908623..909291)	669	PmgA	similar to sll1968; essential for photomixotrophic growth, essential for modulation of PSI/PSII ratio under high light condition	AGF51093.1	1.4116	1.06648	48.0259	50	67.7934	84	51.2185	89
1882	psbZ	CP003265	2068243..2068650	408	photosystem II 11 kD protein	similar to slr1645	AGF52149.1	1.12234	1.06635	436.266	277	489.639	370	465.21	493
397	MYO_14030	CP003265	complement(432881..434410)	1530	hypothetical protein	similar to sll0641	AGF50664.1	0.827882	1.06612	28.5594	68	23.6438	67	30.4478	121
2990	MYO_130380	CP003265	3372558..3374855	2298	hypothetical protein	similar to slr1567	AGF53257.1	1.02696	1.06514	7.54998	27	7.75351	33	8.04181	48
422	MYO_14290	CP003265	complement(463792..464409)	618	hypothetical protein	similar to sll1511	AGF50689.1	1.30704	1.06514	9.35806	9	12.2313	14	9.96768	16
890	bhy	CP003265	complement(981346..982284)	939	b-carotene hydroxylase	similar to sll1468	AGF51157.1	1.04576	1.06467	95.122	139	99.4752	173	101.273	247
541	cpcG_1	CP003265	596042..596749	708	phycobilisome rod-core linker polypeptide CpcG	similar to slr2051	AGF50808.1	1.21547	1.06421	3686.71	4062	4481.08	5876	3923.43	7215
553	MYO_15600	CP003265	612604..613245	642	NarL subfamily	similar to slr1909	AGF50820.1	1.11332	1.06348	40.0366	40	44.5733	53	42.5781	71
1705	ndhK	CP003265	1874032..1874778	747	NADH dehydrogenase subunit NdhK	similar to slr1280	AGF51972.1	0.939656	1.06337	225.379	262	211.778	293	239.66	465
2984	grxC_2	CP003265	3366966..3367295	330	glutaredoxin	similar to slr1562	AGF53251.1	1.42298	1.063	120.728	62	171.795	105	128.334	110
8	psbA2	CP003265	7229..8311	1083	photosystem II D1 protein	similar to slr1311	AGF50275.1	0.991225	1.06293	67148.2	39517	66559	50755	71373.9	74242
3051	MYO_130990	CP003265	3448552..3449253	702	hypothetical protein	similar to slr1652	AGF53318.1	0.982921	1.06263	48.5144	53	47.6858	62	51.5529	94
1427	hhoB	CP003265	complement(1581718..1582968)	1251	protease HhoB	similar to sll1427	AGF51694.1	1.00266	1.06242	138.174	269	138.542	321	146.799	477
1419	MYO_114350	CP003265	1571318..1574170	2853	hybrid sensory kinase	similar to slr2104	AGF51686.1	1.19539	1.0624	21.8475	97	26.1163	138	23.2108	172
3077	norB	CP003265	complement(3475920..3478232)	2313	cytochrome b subunit of nitric oxide reductase	similar to sll0450	AGF53344.1	1.29378	1.06212	48.8955	176	63.2598	271	51.9328	312
2330	MYO_123660	CP003265	complement(2602062..2603162)	1101	hypothetical protein	similar to sll0462	AGF52597.1	1.56348	1.06177	46.1075	79	72.0882	147	48.9557	140
2302	MYO_123370	CP003265	2573360..2573548	189	hypothetical protein	similar to ssr0109	AGF52569.1	1.45199	1.06164	387.592	114	562.78	197	411.483	202
2812	MYO_128510	CP003265	complement(3149507..3150055)	549	hypothetical protein	similar to sll0040	AGF53079.1	1.13269	1.06134	450.63	385	510.422	519	478.272	682
302	ccmA	CP003265	complement(334568..335623)	1056	carboxysome formation protein	similar to sll0934	AGF50569.1	1.02274	1.06089	551.919	907	564.468	1104	585.523	1606
2983	hisS_2	CP003265	3365683..3366888	1206	histidyl tRNA synthetase	similar to slr1560	AGF53250.1	1.23911	1.06074	136.936	257	169.678	379	145.254	455
2685	ppk	CP003265	complement(3001722..3003908)	2187	polyphosphate kinase	similar to sll0290	AGF52952.1	0.981518	1.06043	33.2018	113	32.5881	132	35.2082	200
559	MYO_15660	CP003265	616324..616680	357	hypothetical protein	similar to slr1914	AGF50826.1	1.45426	1.06002	46.799	26	68.0579	45	49.6081	46
58	MYO_1580	CP003265	69284..69985	702	hypothetical protein	similar to slr1119	AGF50325.1	1.37885	1.06002	35.6993	39	49.224	64	37.842	69
533	zntC	CP003265	583182..584198	1017	periplasmic binding protein component of an ABC type zinc uptake transporter	similar to slr2043	AGF50800.1	1.16341	1.06002	8.21399	13	9.55622	18	8.70702	23
1543	MYO_115600	CP003265	complement(1698439..1698900)	462	hypothetical protein	similar to sll0812	AGF51810.1	1.16341	1.06002	18.0814	13	21.0361	18	19.1668	23
1293	MYO_113080	CP003265	complement(1426665..1427399)	735	hypothetical protein	similar to sll1950	AGF51560.1	1.10685	1.06002	90.9238	104	100.639	137	96.3814	184
154	MYO_11550	CP003265	complement(169934..170566)	633	hypothetical protein	similar to sll0216	AGF50421.1	1.09877	1.06002	26.3938	26	29.0008	34	27.978	46
984	MYO_19960	CP003265	1090335..1090934	600	hypothetical protein	similar to slr1449	AGF51251.1	1.06646	1.06002	55.6909	52	59.3919	66	59.0336	92
2101	MYO_121290	CP003265	complement(2328055..2328729)	675	hypothetical protein	similar to sll0160	AGF52368.1	0.872555	1.06002	24.7515	26	21.597	27	26.2372	46
519	proB	CP003265	570942..572069	1128	glutamate 5-kinase	similar to slr2035	AGF50786.1	0.840239	1.06002	22.2171	39	18.6677	39	23.5506	69
2834	MYO_128730	CP003265	complement(3177648..3178805)	1158	hypothetical protein	similar to sll0518	AGF53101.1	0.948656	1.05978	103.213	186	97.9141	210	109.383	329
2306	chlG	CP003265	2575455..2576429	975	chlorophyll a synthase	similar to slr0056	AGF52573.1	1.0702	1.05954	62.611	95	67.0062	121	66.3388	168
607	MYO_16160	CP003265	672401..673114	714	hypothetical protein	similar to slr1378	AGF50874.1	1.15533	1.0592	50.399	56	58.2273	77	53.3826	99
1670	MYO_116910	CP003265	1830829..1831638	810	hypothetical protein	similar to slr1474	AGF51937.1	1.1138	1.05895	34.1126	43	37.9948	57	36.1236	76
1052	psbN	CP003265	1166988..1167119	132	photosystem II PsbN protein	similar to smr0009	AGF51319.1	1.55444	1.05849	584.17	120	908.058	222	618.336	212
3196	MYO_2370	CP003266 (pSYSM_M)	complement(35079..36365)	1287	sulfide-quinone reductase	similar to sll5036	AGF53463.1	0.868246	1.05849	14.9787	30	13.0052	31	15.8548	53
218	MYO_12200	CP003265	242246..243094	849	NarL subfamily	similar to slr1783	AGF50485.1	1.02319	1.05816	93.8525	124	96.0293	151	99.3114	219
2485	MYO_125220	CP003265	2781771..2783123	1353	hypothetical protein	similar to slr0909	AGF52752.1	1.00114	1.05806	22.3219	47	22.3473	56	23.618	83
1088	MYO_111010	CP003265	1212658..1213407	750	hypothetical protein	similar to slr1870	AGF51355.1	0.873189	1.05731	43.6959	51	38.1548	53	46.2002	90
1148	MYO_111610	CP003265	1271878..1272783	906	hypothetical protein	similar to slr2144	AGF51415.1	1.00442	1.05711	123.411	174	123.957	208	130.459	307
1434	MYO_114500	CP003265	1588965..1590833	1869	hypothetical protein	similar to slr1506	AGF51701.1	1.07887	1.05689	85.9533	250	92.7321	321	90.8431	441
922	MYO_19330	CP003265	complement(1017255..1018172)	918	hypothetical protein	similar to sll1144	AGF51189.1	1.0503	1.05682	50.399	72	52.9339	90	53.2628	127
149	glmS	CP003265	complement(161768..163663)	1896	L-glutamine:D-fructose-6-P amidotransferase	similar to sll0220	AGF50416.1	0.992589	1.05673	61.6829	182	61.2258	215	65.1823	321
1672	MYO_116930	CP003265	complement(1832124..1832768)	645	hypothetical protein	similar to sll1380	AGF51939.1	1.6652	1.05667	54.7942	55	91.2433	109	57.8995	97
605	MYO_16140	CP003265	671414..671746	333	hypothetical protein	similar to slr1376	AGF50872.1	1.03266	1.0565	252.789	131	261.045	161	267.073	231
2848	hemE	CP003265	3196000..3197052	1053	uroporphyrinogen decarboxylase	similar to slr0536	AGF53115.1	0.922548	1.05645	149.51	245	137.93	269	157.949	432
5	MYO_150	CP003265	complement(3192..4268)	1077	PNIL34 or AT103-like protein	similar to sll1214	AGF50272.1	1.01201	1.05616	618.721	1037	626.154	1249	653.466	1828
181	MYO_11830	CP003265	196611..196991	381	hypothetical protein	similar to slr1100	AGF50448.1	1.26036	1.05599	134.926	80	170.055	120	142.481	141
2962	proC	CP003265	3335950..3336753	804	pyrroline carboxylate reductase	similar to slr0661	AGF53229.1	1.31679	1.05521	53.5489	67	70.5127	105	56.5052	118
713	trxA_1	CP003265	794017..794346	330	thioredoxin	similar to slr1139	AGF50980.1	1.27716	1.05449	97.3616	50	124.347	76	102.667	88
382	fmu/fmv	CP003265	417303..418643	1341	Fmu and Fmv protein	similar to slr0679	AGF50649.1	0.862645	1.05449	71.8777	150	62.0049	154	75.7945	264
920	prc	CP003265	1015166..1016437	1272	carboxyl-terminal protease	similar to slr1751	AGF51187.1	1.04759	1.05429	548.624	1086	574.733	1354	578.411	1911
2076	MYO_121040	CP003265	2297782..2299713	1932	hypothetical protein	similar to slr0168	AGF52343.1	1.08486	1.05419	26.2755	79	28.5054	102	27.6994	139
183	MYO_11850	CP003265	197624..200185	2562	hypothetical protein	similar to slr1102	AGF50450.1	1.1498	1.05413	66.7167	266	76.7108	364	70.3282	468
196	ccmL	CP003265	complement(218407..218709)	303	carbon dioxide concentrating mechanism protein CcmL	similar to sll1030	AGF50463.1	1.1622	1.0527	453.84	214	527.453	296	477.758	376
1104	cpcE	CP003265	1227590..1228408	819	phycocyanin alpha phycocyanobilin lyase CpcE	similar to slr1878	AGF51371.1	1.22629	1.05255	29.0302	37	35.5995	54	30.5557	65
1126	hemC	CP003265	1245662..1246624	963	porphobilinogen deaminase	similar to slr1887	AGF51393.1	1.08031	1.05246	126.115	189	136.243	243	132.732	332
245	pheA	CP003265	complement(270476..271369)	894	chorismate mutase /prephenate dehydratase	similar to sll1662	AGF50512.1	1.34654	1.05234	56.0646	78	75.493	125	58.9991	137
2658	MYO_126960	CP003265	2969483..2970490	1008	hypothetical protein	similar to slr0103	AGF52925.1	1.17633	1.05183	28.6869	45	33.7454	63	30.1737	79
2822	MYO_128610	CP003265	complement(3160006..3161511)	1506	hypothetical protein	similar to sll0033	AGF53089.1	0.95227	1.05183	19.2008	45	18.2844	51	20.196	79
1056	MYO_110690	CP003265	1170226..1179276	9051	integrin alpha- and beta4- subunit domain-like protein	similar to slr1403	AGF51323.1	1.13506	1.05113	8.09357	114	9.18668	154	8.50739	200
256	MYO_12600	CP003265	complement(282290..282700)	411	hypothetical protein	similar to sll1652	AGF50523.1	1.05808	1.05035	126.641	81	133.996	102	133.018	142
2483	psbB	CP003265	2776778..2778301	1524	photosystem II CP47 protein	similar to slr0906	AGF52750.1	1.16217	1.05	3913.29	9281	4547.92	12837	4108.96	16265
664	dnaE_1	CP003265	complement(735936..737312)	1377	DNA polymerase III alpha subunit	similar to sll1572	AGF50931.1	1.14805	1.04998	47.1324	101	54.1103	138	49.4882	177
2605	pcr	CP003265	2912096..2913064	969	protochlorophyllide oxido-reductase	similar to slr0506	AGF52872.1	0.833057	1.04978	77.5879	117	64.6351	116	81.4503	205
401	MYO_14070	CP003265	438024..439220	1197	hypothetical protein	similar to slr0689	AGF50668.1	0.814144	1.04943	86.4298	161	70.3663	156	90.7022	282
1707	MYO_117290	CP003265	1875677..1876036	360	transposase	similar to slr1282	AGF51974.1	1.68048	1.0485	7.13985	4	11.9984	8	7.48614	7
2727	merR_1	CP003265	complement(3054485..3055597)	1113	mercuric resistance operon regulatory protein precorrin isomerase	similar to sll0794	AGF52994.1	1.34115	1.0485	30.022	52	40.264	83	31.4781	91
1016	ruvA	CP003265	complement(1131919..1132554)	636	Holliday junction DNA helicase RuvA	similar to sll0876	AGF51283.1	1.14032	1.0485	56.58	56	64.5195	76	59.3242	98
431	MYO_14380	CP003265	469694..471016	1323	hypothetical protein	similar to slr1603	AGF50698.1	1.12615	1.0485	69.9414	144	78.7647	193	73.3337	252
2981	MYO_130280	CP003265	complement(3363211..3364404)	1194	hypothetical protein	similar to sll1495	AGF53248.1	1.11032	1.0485	15.069	28	16.7314	37	15.7999	49
211	cad	CP003265	complement(234905..236356)	1452	lysine decarboxylase	similar to sll1683	AGF50478.1	1.10281	1.0485	7.08085	16	7.80885	21	7.42428	28
1509	atpE	CP003265	1666913..1667410	498	ATP synthase e subunit	similar to slr1330	AGF51776.1	0.987727	1.0485	242.583	188	239.606	221	254.349	329
3355	MYO_4660	CP003267 (pSYSA_M)	60509..61612	1104	hypothetical protein	similar to slr7068	AGF53622.1	0.854243	1.0485	34.9232	60	29.8329	61	36.617	105
2413	MYO_124500	CP003265	complement(2693393..2693674)	282	hypothetical protein	similar to ssl0750	AGF52680.1	0.840239	1.0485	18.2294	8	15.3171	8	19.1136	14
1556	MYO_115740	CP003265	complement(1709562..1710128)	567	transposase	similar to sll0808	AGF51823.1	1.89054	1.0485	4.53324	4	8.57026	9	4.75311	7
347	MYO_13530	CP003265	376485..377639	1155	hypothetical protein	similar to slr1073	AGF50614.1	1.26036	1.0485	24.4795	44	30.8529	66	25.6668	77
3510	MYO_3690	CP003269 (pSYSX_M)	63373..64167	795	hypothetical protein	similar to slr6068	AGF53777.1	1.26036	1.0485	3.23314	0	4.07491	0	3.38995	0
1451	menA	CP003265	1608295..1609218	924	1,4-dihydroxy-2-naphtoic acid prenyltransferase	similar to slr1518	AGF51718.1	1.2442	1.0485	108.489	156	134.982	231	113.751	273
2575	MYO_126130	CP003265	2878034..2878423	390	hypothetical protein	similar to slr0078	AGF52842.1	1.0713	1.0485	65.9063	40	70.6057	51	69.1029	70
2677	MYO_127160	CP003265	2993176..2993901	726	OmpR subfamily	similar to slr0115	AGF52944.1	1.03414	1.0485	46.0255	52	47.5968	64	48.2578	91
3034	MYO_130820	CP003265	complement(3420485..3420739)	255	hypothetical protein	similar to ssl1378	AGF53301.1	0.945268	1.0485	20.1596	8	19.0562	9	21.1373	14
151	MYO_11520	CP003265	complement(165871..166389)	519	hypothetical protein	similar to sll0218	AGF50418.1	0.735209	1.0485	9.905	8	7.28224	7	10.3854	14
2553	pcnB_2	CP003265	complement(2853428..2854678)	1251	polyA polymerase	similar to sll0825	AGF52820.1	0.630179	1.0485	16.4371	32	10.3583	24	17.2343	56
1585	MYO_116040	CP003265	complement(1738857..1739243)	387	hypothetical protein	similar to sll1250	AGF51852.1	0.420119	1.0485	6.64172	4	2.79032	2	6.96386	7
2025	MYO_120520	CP003265	2238607..2240055	1449	hypothetical protein	similar to slr1940	AGF52292.1	1.25683	1.04724	52.7728	119	66.3263	178	55.2659	208
1784	leuA_1	CP003265	complement(1957905..1959548)	1644	alpha-isopropylmalate synthase	similar to sll1564	AGF52051.1	1.30115	1.04705	80.5188	206	104.767	319	84.3069	360
1014	MYO_110270	CP003265	complement(1129968..1131338)	1371	hypothetical protein	similar to sll0877	AGF51281.1	1.27484	1.04678	40.7768	87	51.9841	132	42.6844	152
2028	MYO_120550	CP003265	2241118..2242635	1518	hypothetical protein	similar to slr1942	AGF52295.1	1.08671	1.0465	31.7484	75	34.5012	97	33.2248	131
2075	MYO_121030	CP003265	2296614..2297708	1095	hypothetical protein	similar to slr0338	AGF52342.1	0.846702	1.0462	76.2888	130	64.5939	131	79.8131	227
2233	recG	CP003265	2494993..2497488	2496	DNA recombinase	similar to slr0020	AGF52500.1	1.08031	1.04612	16.2191	63	17.5216	81	16.9672	110
3280	MYO_21210	CP003266 (pSYSM_M)	109617..109907	291	hypothetical protein	similar to ssr5120	AGF53547.1	1.25324	1.04596	130.284	59	163.277	88	136.272	103
2230	MYO_122640	CP003265	complement(2490845..2491420)	576	hypothetical protein	similar to sll0007	AGF52497.1	0.870793	1.04578	61.3581	55	53.4302	57	64.167	96
812	MYO_18210	CP003265	890931..892904	1974	short-chain alcohol dehydrogenase family	similar to slr1208	AGF51079.1	1.3461	1.04544	31.9015	98	42.9425	157	33.3512	171
603	MYO_16120	CP003265	complement(669261..670451)	1191	hypothetical protein	similar to sll0980	AGF50870.1	0.983258	1.04531	50.7163	94	49.8672	110	53.0145	164
2156	ycf38	CP003265	complement(2407298..2408182)	885	Ycf38	similar to sll0760	AGF52423.1	0.903328	1.04492	212.743	293	192.177	315	222.3	511
1776	spoU	CP003265	1952260..1953084	825	rRNA methylase	similar to slr1673	AGF52043.1	1.0126	1.04466	30.3768	39	30.7594	47	31.7335	68
732	tktA	CP003265	complement(817622..819634)	2013	transketolase	similar to sll1070	AGF50999.1	1.0542	1.04426	653.121	2046	688.52	2567	682.025	3566
1208	ndh_2	CP003265	1335769..1337106	1338	NADH dehydrogenase	similar to slr0851	AGF51475.1	1.44041	1.04422	16.8091	35	24.2119	60	17.5524	61
145	MYO_11460	CP003265	complement(159812..159961)	150	hypothetical protein	similar to sgl0002	AGF50412.1	0.967547	1.04396	282.738	66	273.563	76	295.168	115
1039	MYO_110520	CP003265	1154512..1155738	1227	ABC1-like protein	similar to slr0889	AGF51306.1	0.908366	1.04355	174.394	333	158.414	360	181.989	580
2232	MYO_122660	CP003265	complement(2492760..2494805)	2046	ABC1-like protein	similar to sll0005	AGF52499.1	0.967775	1.04315	35.1758	112	34.0423	129	36.6937	195
3123	argG	CP003265	3529935..3531137	1203	argininosuccinate synthetase	similar to slr0585	AGF53390.1	0.981966	1.04309	88.6695	166	87.0704	194	92.49	289
1394	MYO_114090	CP003265	1541505..1542170	666	hypothetical protein	similar to slr2084	AGF51661.1	1.19293	1.04295	78.1524	81	93.2305	115	81.5094	141
2919	MYO_129600	CP003265	3279222..3279575	354	hypothetical protein	similar to slr1425	AGF53186.1	1.13588	1.04295	98.0217	54	111.341	73	102.232	94
3109	MYO_131570	CP003265	complement(3517874..3518458)	585	hypothetical protein	similar to sll1109	AGF53376.1	1.04252	1.04295	59.3157	54	61.8377	67	61.8635	94
1587	icfA_1	CP003265	1740903..1741838	936	carbonic anhydrase	similar to slr1347	AGF51854.1	1.0777	1.04199	63.1602	92	68.0676	118	65.8123	160
2430	pyrR	CP003265	complement(2714445..2714981)	537	pyrimidine operon regulatory protein PyrR	similar to sll0368	AGF52697.1	0.913303	1.04199	55.0447	46	50.2725	50	57.3559	80
301	MYO_13060	CP003265	333130..334485	1356	hypothetical protein	similar to slr0971	AGF50568.1	1.0115	1.04182	74.3998	157	75.2552	189	77.5114	273
1508	atpB	CP003265	1665401..1666852	1452	ATP synthase b subunit	similar to slr1329	AGF51775.1	0.988295	1.04127	494.774	1118	488.983	1315	515.192	1943
1658	MYO_116780	CP003265	complement(1822437..1823201)	765	hypothetical protein	similar to sll1387	AGF51925.1	1.1176	1.04123	86.5182	103	96.6927	137	90.0854	179
1122	MYO_111350	CP003265	1242908..1243075	168	hypothetical protein	similar to ssr3189	AGF51389.1	1.0442	1.04102	3293.26	861	3438.82	1070	3428.35	1496
109	dfr	CP003265	complement(124452..126443)	1992	drug sensory protein A	similar to sll0698	AGF50376.1	1.15263	1.04082	50.3231	156	58.0041	214	52.3772	271
2584	thrS	CP003265	complement(2888469..2890280)	1812	threonyl-tRNA synthetase	similar to sll0078	AGF52851.1	0.931464	1.0408	62.06	175	57.8067	194	64.5919	304
1362	MYO_113770	CP003265	1510141..1510446	306	hypothetical protein	similar to slr0263	AGF51629.1	1.41514	1.04062	39.8992	19	56.4629	32	41.5198	33
851	MYO_18610	CP003265	931726..932718	993	hypothetical protein	similar to slr1829	AGF51118.1	1.39745	1.04062	122.952	190	171.819	316	127.946	330
367	MYO_13730	CP003265	complement(393223..393951)	729	hypothetical protein	similar to sll1022	AGF50634.1	0.907358	1.04052	297.935	338	270.333	365	310.008	587
2208	clpC	CP003265	complement(2463674..2466139)	2466	ATP-dependent Clp protease regulatory subunit	similar to sll0020	AGF52475.1	1.04292	1.04026	786.426	3018	820.18	3746	818.09	5240
3361	MYO_4720	CP003267 (pSYSA_M)	complement(64211..64507)	297	hypothetical protein	similar to ssl7074	AGF53628.1	1.06219	1.04002	114.67	53	121.802	67	119.26	92
808	MYO_18170	CP003265	887245..887739	495	ferredoxin component	similar to slr1205	AGF51075.1	0.869212	1.03989	112.939	87	98.1684	90	117.445	151
2182	MYO_122110	CP003265	2433710..2434495	786	hypothetical protein	similar to slr0347	AGF52449.1	1.28507	1.03969	27.7964	34	35.7203	52	28.8996	59
658	spkA	CP003265	complement(729610..731175)	1566	SpkA		AGF50925.1	0.981966	1.03948	102.174	249	100.331	291	106.207	432
2628	MYO_126660	CP003265	complement(2935016..2935576)	561	hypothetical protein	similar to sll0470	AGF52895.1	0.950392	1.03937	375.701	328	357.063	371	390.492	569
1279	MYO_112940	CP003265	complement(1406953..1408119)	1167	hypothetical protein	similar to sll1961	AGF51546.1	1.23464	1.03933	53.9619	98	66.6233	144	56.0842	170
1437	ntpJ	CP003265	1593754..1595088	1335	Na+ -ATPase subunit J	similar to slr1509	AGF51704.1	0.840239	1.03933	23.5856	49	19.8175	49	24.5132	85
124	MYO_11240	CP003265	142559..142981	423	hypothetical protein	similar to slr0240	AGF50391.1	1.18885	1.03894	142.797	94	169.764	133	148.358	163
1767	MYO_117890	CP003265	complement(1939018..1940556)	1539	sodium-coupled permease	similar to sll1087	AGF52034.1	1.0744	1.03868	101.879	244	109.459	312	105.819	423
341	galE_1	CP003265	371487..372509	1023	UDP-glucose-4-epimerase	similar to slr1067	AGF50608.1	1.00829	1.03852	47.1105	75	47.5008	90	48.9249	130
441	MYO_14480	CP003265	482644..482805	162	hypothetical protein	similar to ssr2708	AGF50708.1	1.00829	1.03852	59.4988	15	59.9918	18	61.7904	26
3087	MYO_131350	CP003265	complement(3493107..3493442)	336	hypothetical protein	similar to sll0442	AGF53354.1	0.448127	1.03852	28.6869	15	12.8554	8	29.7918	26
1948	MYO_119730	CP003265	complement(2143268..2143735)	468	hypothetical protein	similar to sll0359	AGF52215.1	1.07832	1.03843	1245.36	907	1342.89	1164	1293.21	1572
1432	ntcA	CP003265	complement(1587853..1588530)	678	global nitrogen regulator	similar to sll1423	AGF51699.1	1.02101	1.03836	237.89	251	242.887	305	247.014	435
1612	MYO_116310	CP003265	1769159..1769890	732	hypothetical protein	similar to slr1966	AGF51879.1	1.10059	1.03795	62.3274	71	68.5972	93	64.6929	123
3354	MYO_4650	CP003267 (pSYSA_M)	complement(58506..60182)	1677	hypothetical protein	similar to sll7067	AGF53621.1	0.708686	1.03791	75.8689	198	53.7672	167	78.7451	343
769	rpl23	CP003265	complement(840657..840962)	306	50S ribosomal protein L23	similar to sll1801	AGF51036.1	1.01499	1.03783	737.085	351	748.133	424	764.971	608
2253	petE	CP003265	complement(2523094..2523474)	381	plastocyanin	similar to sll0199	AGF52520.1	1.17901	1.03777	1907.52	1131	2248.98	1587	1979.58	1959
1618	MYO_116370	CP003265	1776198..1778450	2253	hybrid sensory kinase	similar to slr1969	AGF51885.1	1.14081	1.03754	35.0813	123	40.0212	167	36.3983	213
2024	MYO_120510	CP003265	2236506..2238515	2010	hypothetical protein	similar to slr1939	AGF52291.1	0.972498	1.03741	34.5271	108	33.5775	125	35.8186	187
1507	MYO_115240	CP003265	complement(1663267..1665168)	1902	hybrid sensory kinase	similar to sll1228	AGF51774.1	1.08941	1.03714	48.988	145	53.3681	188	50.8073	251
1817	MYO_118390	CP003265	1997946..1999199	1254	hypothetical protein	similar to slr0937	AGF52084.1	0.988896	1.03698	66.6159	130	65.8762	153	69.0793	225
1308	MYO_113230	CP003265	1443894..1444304	411	hypothetical protein	similar to slr1999	AGF51575.1	1.35731	1.03698	40.6503	26	55.1749	42	42.1535	45
2386	MYO_124230	CP003265	complement(2660954..2661268)	315	hypothetical protein	similar to sll0608	AGF52653.1	0.904872	1.03698	53.0389	26	47.9934	28	55.0002	45
844	rpl19	CP003265	complement(926515..926883)	369	50S ribosomal protein L19	similar to sll1740	AGF51111.1	0.935327	1.03679	846.334	486	791.599	541	877.47	841
2297	MYO_123320	CP003265	complement(2566243..2567013)	771	hypothetical protein	similar to sll0069	AGF52564.1	1.20358	1.03636	30.8375	37	37.1155	53	31.9586	64
3004	MYO_130520	CP003265	complement(3386662..3387150)	489	hypothetical protein	similar to sll1485	AGF53271.1	1.11275	1.03636	48.6211	37	54.103	49	50.3888	64
3321	MYO_4320	CP003267 (pSYSA_M)	complement(28638..28970)	333	hypothetical protein	similar to sll7034	AGF53588.1	0.953784	1.03636	71.3985	37	68.0988	42	73.9943	64
2980	MYO_130270	CP003265	complement(3361517..3363064)	1548	mannose-1-phosphate guanyltransferase	similar to sll1496	AGF53247.1	1.0617	1.03573	53.5489	129	56.8527	163	55.4621	223
296	MYO_13010	CP003265	complement(327604..327981)	378	hypothetical protein	similar to sll0939	AGF50563.1	1.65647	1.03566	118.998	70	197.116	138	123.241	121
2442	MYO_124790	CP003265	complement(2726080..2727339)	1260	hypothetical protein	similar to sll0185	AGF52709.1	1.03258	1.03515	211.646	415	218.542	510	219.084	717
2014	MYO_120400	CP003265	2228906..2230303	1398	hypothetical protein	similar to slr1935	AGF52281.1	1.14578	1.03488	30.3367	66	34.7592	90	31.395	114
41	MYO_1410	CP003265	50246..51895	1650	hypothetical protein	similar to slr1495	AGF50308.1	1.4004	1.03488	12.8517	33	17.9975	55	13.3001	57
2152	MYO_121800	CP003265	complement(2403399..2404235)	837	hypothetical protein	similar to sll0765	AGF52419.1	0.973913	1.03488	33.78	44	32.8987	51	34.9583	76
2927	MYO_129680	CP003265	3288365..3289234	870	hypothetical protein	similar to slr1429	AGF53194.1	0.840239	1.03488	32.4986	44	27.3066	44	33.6323	76
2531	MYO_125690	CP003265	2825408..2826340	933	hypothetical protein	similar to slr0583	AGF52798.1	1.01713	1.03431	65.4295	95	66.5504	115	67.6745	164
2648	trxA_3	CP003265	2958388..2958711	324	thioredoxin	similar to slr0623	AGF52915.1	1.04365	1.03428	1065.03	537	1111.51	667	1101.53	927
3377	MYO_4880	CP003267 (pSYSA_M)	complement(82641..85580)	2940	hypothetical protein	similar to sll7090	AGF53644.1	0.802693	1.03396	141.85	649	113.862	620	146.667	1120
738	MYO_17470	CP003265	complement(823038..823670)	633	aklaviketone reductase	similar to sll1825	AGF51005.1	1.10963	1.03364	132.984	131	147.563	173	137.457	226
1333	guaB_1	CP003265	1474024..1475187	1164	IMP dehydrogenase subunit	similar to slr1722	AGF51600.1	1.03944	1.03348	363.249	658	377.577	814	375.41	1135
1276	MYO_112910	CP003265	1403906..1404445	540	hypothetical protein	similar to slr1261	AGF51543.1	1.26036	1.03339	259.415	218	326.955	327	268.075	376
153	ctpB	CP003265	168533..169921	1389	carboxyl-terminal protease	similar to slr0257	AGF50420.1	1.07878	1.03327	218.359	472	235.562	606	225.624	814
380	exbB_2	CP003265	415664..416347	684	biopolymer transport ExbB protein	similar to slr0677	AGF50647.1	1.21735	1.03317	119.311	127	145.243	184	123.268	219
1177	MYO_111900	CP003265	1299131..1300126	996	hypothetical protein	similar to slr1819	AGF51444.1	1.07203	1.03301	37.4197	58	40.115	74	38.6548	100
2369	rps14	CP003265	2642063..2642365	303	30S ribosomal protein S14	similar to slr0628	AGF52636.1	1.06559	1.03301	553.515	261	589.82	331	571.785	450
1379	MYO_113940	CP003265	1524693..1525643	951	hypothetical protein	similar to slr0273	AGF51646.1	0.985107	1.03301	39.1904	58	38.6067	68	40.4839	100
1840	MYO_118620	CP003265	2021747..2022481	735	hypothetical protein	similar to slr0953	AGF52107.1	0.869212	1.03301	25.3538	29	22.0378	30	26.1906	50
1119	MYO_111320	CP003265	1240806..1241075	270	hypothetical protein	similar to ssr3188	AGF51386.1	0.864245	1.03281	249.895	105	215.97	108	258.094	181
980	recJ	CP003265	complement(1082092..1084371)	2280	single-strand-DNA-specific exonuclease RecJ	similar to sll1354	AGF51247.1	0.874837	1.03264	47.9122	170	41.9153	177	49.4761	293
66	dapB	CP003265	complement(76580..77407)	828	dihydrodipicolinate reductase	similar to sll1058	AGF50333.1	1.46789	1.03226	64.4139	83	94.5523	145	66.4918	143
592	MYO_16010	CP003265	660624..662321	1698	hypothetical protein	similar to slr1033	AGF50859.1	1.35372	1.03186	6.81187	18	9.22135	29	7.02889	31
535	MYO_15420	CP003265	584999..585844	846	hypothetical protein	similar to slr2045	AGF50802.1	0.980278	1.03186	27.3441	36	26.8048	42	28.2153	62
933	purC	CP003265	1029850..1030644	795	phosphoribosyl aminoidazole succinocarboxamide synthetase	similar to slr1226	AGF51200.1	0.937189	1.03122	84.0617	104	78.7817	116	86.6859	179
2500	MYO_125370	CP003265	2795881..2796741	861	hypothetical protein	similar to slr0924	AGF52767.1	0.919258	1.03113	238.078	319	218.855	349	245.489	549
1919	MYO_119440	CP003265	complement(2108409..2113145)	4737	hypothetical protein	similar to sll0267	AGF52186.1	1.05442	1.03088	27.6731	204	29.179	256	28.5277	351
2690	MYO_127290	CP003265	3007425..3008132	708	hypothetical protein	similar to slr0299	AGF52957.1	1.31077	1.03053	22.6902	25	29.7417	39	23.3829	43
3221	MYO_2620	CP003266 (pSYSM_M)	complement(64868..65245)	378	hypothetical protein	similar to sll5061	AGF53488.1	1.27716	1.03053	42.4991	25	54.2783	38	43.7965	43
3386	MYO_4970	CP003267 (pSYSA_M)	93790..94380	591	hypothetical protein	similar to slr7099	AGF53653.1	0.773019	1.03053	27.1822	25	21.0124	23	28.012	43
1908	dnaX_2	CP003265	2094911..2095870	960	DNA polymerase III subunit	similar to slr0446	AGF52175.1	0.571362	1.03053	16.734	25	9.56119	17	17.2449	43
419	ccsA	CP003265	complement(461058..462062)	1005	c-type cytochrome synthesis protein	similar to sll1513	AGF50686.1	0.984115	1.03003	280.053	438	275.604	513	288.464	753
2452	MYO_124890	CP003265	complement(2736417..2737922)	1506	hypothetical protein	similar to sll0180	AGF52719.1	1.08146	1.02915	178.354	418	192.882	538	183.553	718
371	hliA_1	CP003265	398290..398463	174	high light inducible protein	similar to ssr1789	AGF50638.1	1.14146	1.02872	195.73	53	223.418	72	201.351	91
996	pykF_1	CP003265	complement(1101938..1103713)	1776	pyruvate kinase	similar to sll1275	AGF51263.1	0.895917	1.02865	60.0616	166	53.8102	177	61.7824	285
2811	MYO_128500	CP003265	complement(3146243..3149245)	3003	tsr or CheD	similar to sll0041	AGF53078.1	1.03312	1.02778	136.092	636	140.6	782	139.872	1091
407	MYO_14140	CP003265	446332..446853	522	hypothetical protein	similar to slr0695	AGF50674.1	1.12959	1.02767	185.882	151	209.971	203	191.026	259
2681	thiC	CP003265	2996449..2997828	1380	ThiC protein	similar to slr0118	AGF52948.1	1.17222	1.02763	608.129	1306	712.859	1822	624.93	2240
1397	ycf44	CP003265	1545651..1547027	1377	c-type cytochrome biogenesis protein Ccs1	similar to slr2087	AGF51664.1	1.11523	1.02762	76.9984	165	85.8706	219	79.1253	283
1306	MYO_113210	CP003265	complement(1439471..1442515)	3045	hybrid sensory kinase	similar to sll1905	AGF51573.1	1.06504	1.02748	48.1149	228	51.2442	289	49.437	391
1360	ndhH	CP003265	1508459..1509643	1185	NADH dehydrogenase subunit 7	similar to slr0261	AGF51627.1	0.950603	1.02725	309.635	571	294.34	646	318.073	979
1082	MYO_110950	CP003265	1204016..1205017	1002	hypothetical protein	similar to slr1866	AGF51349.1	2.76078	1.0271	4.48913	7	12.3935	23	4.6108	12
3299	MYO_4100	CP003267 (pSYSA_M)	complement(5340..6284)	945	hypothetical protein	similar to sll7009	AGF53566.1	1.38039	1.0271	9.5198	14	13.1411	23	9.77782	24
1764	MYO_117860	CP003265	1936898..1937251	354	hypothetical protein	similar to slr1170	AGF52031.1	1.38039	1.0271	25.413	14	35.08	23	26.1018	24
1701	MYO_117230	CP003265	complement(1870324..1871058)	735	hypothetical protein	similar to sll1173	AGF51968.1	1.32037	1.0271	6.11987	7	8.08053	11	6.28574	12
3078	MYO_131260	CP003265	3478659..3479375	717	DNR protein	similar to slr0449	AGF53345.1	1.20034	1.0271	6.27351	7	7.53035	10	6.44354	12
2697	MYO_127360	CP003265	3017569..3019089	1521	hypothetical protein	similar to slr0306	AGF52964.1	1.15233	1.0271	14.7867	35	17.0391	48	15.1874	60
2423	braG	CP003265	complement(2705525..2706274)	750	high-affinity branched-chain amino acid transport ATP-binding protein	similar to sll0374	AGF52690.1	1.12532	1.0271	47.9798	56	53.9926	75	49.2802	96
1820	pqqE	CP003265	complement(2001360..2002934)	1575	protease	similar to sll0915	AGF52087.1	0.874534	1.0271	39.9832	98	34.9666	102	41.0669	168
1127	MYO_111400	CP003265	1246754..1248646	1893	hypothetical protein	similar to slr1888	AGF51394.1	0.74021	1.0271	14.2571	42	10.5532	37	14.6435	72
1601	hypC	CP003265	complement(1755753..1755983)	231	hydrogenase expression/formation protein HypC	similar to ssl3580	AGF51868.1	0.60017	1.0271	38.9447	14	23.3734	10	40.0002	24
26	exbB_1	CP003265	complement(32912..33544)	633	biopolymer transport ExbB protein	similar to sll1404	AGF50293.1	0.360102	1.0271	7.10602	7	2.55889	3	7.29861	12
29	MYO_1290	CP003265	36721..38538	1818	ABC transporter	similar to slr1488	AGF50296.1	1.32037	1.0271	2.47421	7	3.26688	11	2.54127	12
2816	ilvE	CP003265	3154028..3154945	918	branched-chain amino acid aminotransferase	similar to slr0032	AGF53083.1	1.14705	1.02675	168.697	241	193.503	329	173.209	413
2154	MYO_121830	CP003265	complement(2406138..2406812)	675	hypothetical protein		AGF52421.1	1.33231	1.02616	172.308	181	229.569	287	176.816	310
2387	MYO_124240	CP003265	2661671..2663155	1485	integral membrane protein	similar to slr0642	AGF52654.1	1.2169	1.02612	37.6465	87	45.8119	126	38.6298	149
1625	MYO_116440	CP003265	complement(1783463..1784029)	567	hypothetical protein	similar to sll1886	AGF51892.1	0.98728	1.02603	90.6648	80	89.5116	94	93.0251	137
2879	hisG	CP003265	complement(3230446..3231078)	633	ATP phosphoribosyltransferase	similar to sll0900	AGF53146.1	0.791763	1.02546	52.7875	52	41.7952	49	54.1314	89
2521	cyp_2	CP003265	2815130..2816464	1335	cytochrome P450	similar to slr0574	AGF52788.1	1.13899	1.0252	21.6602	45	24.6708	61	22.2061	77
972	MYO_19830	CP003265	complement(1071389..1072573)	1185	hypothetical protein	similar to sll1358	AGF51239.1	1.03941	1.0252	73.2061	135	76.0909	167	75.051	231
1358	MYO_113730	CP003265	complement(1506640..1506855)	216	hypothetical protein	similar to ssl0467	AGF51625.1	1.23702	1.02354	214.196	72	264.964	106	219.237	123
287	MYO_12910	CP003265	317984..318571	588	hypothetical protein	similar to slr1307	AGF50554.1	1.15533	1.02354	26.228	24	30.302	33	26.8454	41
2598	MYO_126360	CP003265	complement(2905443..2906651)	1209	hypothetical protein	similar to sll0487	AGF52865.1	0.875248	1.02354	38.2682	72	33.4942	75	39.1689	123
268	MYO_12720	CP003265	295076..297343	2268	hypothetical protein	similar to slr1298	AGF50535.1	0.787724	1.02354	13.5997	48	10.7128	45	13.9198	82
3092	MYO_131400	CP003265	complement(3499728..3500183)	456	hypothetical protein	similar to sll0436	AGF53359.1	0.840239	1.02354	33.8204	24	28.4172	24	34.6164	41
3431	MYO_5390	CP003268 (pSYSG_M)	32698..36411	3714	WD-repeat protein	similar to slr8038	AGF53698.1	0.987904	1.02329	69.899	404	69.0536	475	71.527	690
2699	MYO_127380	CP003265	complement(3019800..3021539)	1740	hypothetical protein	similar to sll0284	AGF52966.1	1.20912	1.02293	15.1414	41	18.3078	59	15.4886	70
186	fus_1	CP003265	204604..206397	1794	elongation factor EF-G	similar to slr1105	AGF50453.1	1.09987	1.02263	294.429	822	323.835	1076	301.091	1403
951	MYO_19620	CP003265	complement(1048405..1048671)	267	hypothetical protein	similar to ssl2245	AGF51218.1	0.847947	1.02239	262.329	109	222.442	110	268.203	186
220	MYO_12220	CP003265	complement(244160..244708)	549	spore maturation protein A	similar to sll1678	AGF50487.1	0.691961	1.02207	19.898	17	13.7686	14	20.3371	29
2083	MYO_121110	CP003265	complement(2304117..2305739)	1623	putative ORF1	similar to sll0175	AGF52350.1	1.63105	1.02207	6.73073	17	10.9782	33	6.87927	29
2567	ycf24	CP003265	2868942..2870384	1443	ABC transporter subunit	similar to slr0074	AGF52834.1	0.979419	1.02185	72.586	163	71.0922	190	74.1722	278
807	htrA	CP003265	885839..887197	1359	serine protease HtrA	similar to slr1204	AGF51074.1	0.755563	1.0218	60.9961	129	46.0864	116	62.3255	220
2331	proA_1	CP003265	complement(2603363..2604625)	1263	gamma-glutamyl phosphate reductase	similar to sll0461	AGF52598.1	1.15504	1.02168	184.686	363	213.32	499	188.69	619
2206	MYO_122390	CP003265	2461794..2462276	483	hypothetical protein	similar to slr0001	AGF52473.1	1.15603	1.02136	198.231	149	229.161	205	202.465	254
3284	MYO_21250	CP003266 (pSYSM_M)	112352..113182	831	hypothetical protein	similar to slr5124	AGF53551.1	1.43222	1.02127	34.0238	44	48.7298	74	34.7474	74
2578	rnhA	CP003265	2881625..2882107	483	ribonuclease H	similar to slr0080	AGF52845.1	0.828404	1.02108	94.4589	71	78.2502	70	96.4497	121
2104	MYO_121320	CP003265	complement(2332144..2332770)	627	hypothetical protein	similar to sll0156	AGF52371.1	0.934345	1.02094	128.107	125	119.697	139	130.79	213
2065	psaC	CP003265	complement(2284601..2284846)	246	photosystem I subunit VII	similar to ssl0563	AGF52332.1	1.1546	1.02086	6765.45	2590	7811.37	3559	6906.56	4413
2006	MYO_120320	CP003265	2221140..2221835	696	hypothetical protein	similar to slr1932	AGF52273.1	1.15766	1.02076	124.64	135	144.291	186	127.228	230
2370	im30_1	CP003265	complement(2642539..2643342)	804	membrane-associated 30 kD protein	similar to sll0617; similar to chloroplast membrane-associated 30 kD protein	AGF52637.1	1.21349	1.02045	401.217	502	486.874	725	409.423	855
2132	MYO_121600	CP003265	2383208..2384437	1230	hypothetical protein	similar to slr0384	AGF52399.1	0.976493	1.02016	19.3298	37	18.8755	43	19.7196	63
805	lacF	CP003265	884290..885186	897	lactose transport system permease protein LacF	similar to slr1202	AGF51072.1	0.749402	1.02016	26.5058	37	19.8635	33	27.0403	63
1355	MYO_113700	CP003265	complement(1503287..1505239)	1953	hypothetical protein	similar to sll0254	AGF51622.1	1.04276	1.02008	64.16	195	66.9033	242	65.4483	332
2839	murE	CP003265	3182001..3183518	1518	UDP-MurNac-tripeptide synthetase	similar to slr0528	AGF53106.1	0.923798	1.01954	76.6194	181	70.7808	199	78.1163	308
216	MYO_12180	CP003265	complement(240299..240829)	531	hypothetical protein	similar to sll1680	AGF50483.1	0.940566	1.01944	81.0797	67	76.2608	75	82.6557	114
3443	MYO_320	CP003269 (pSYSX_M)	465..3053	2589	two-component hybrid sensor and regulator	similar to slr6001	AGF53710.1	1.00564	1.01902	31.5213	127	31.699	152	32.1207	216
1094	MYO_111070	CP003265	complement(1221080..1221397)	318	hypothetical protein	similar to sll1769	AGF51361.1	1.33038	1.01854	121.243	60	161.299	95	123.491	102
2912	MYO_129530	CP003265	3269433..3270710	1278	hypothetical protein	similar to slr1420	AGF53179.1	1.26036	1.01854	5.02807	10	6.33716	15	5.12131	17
731	MYO_17400	CP003265	complement(816638..817465)	828	hypothetical protein	similar to sll1071	AGF50998.1	1.0713	1.01854	62.0857	80	66.5126	102	63.237	136
3516	MYO_3750	CP003269 (pSYSX_M)	71154..72809	1656	hypothetical protein	similar to slr6074	AGF53783.1	1.02929	1.01854	15.5214	0	15.9761	0	15.8092	0
1213	MYO_112270	CP003265	complement(1340164..1340580)	417	hypothetical protein	similar to sll0857	AGF51480.1	0.88225	1.01854	61.639	40	54.3811	42	62.7821	68
1179	thrC_1	CP003265	complement(1301765..1303066)	1302	threonine synthase	similar to sll1688	AGF51446.1	0.574325	1.0182	341.528	692	196.148	473	347.743	1176
3237	MYO_2780	CP003266 (pSYSM_M)	75147..75929	783	hypothetical protein	similar to slr5077	AGF53504.1	1.10698	1.01759	51.7024	60	57.2336	80	52.612	101
995	MYO_110080	CP003265	complement(1100065..1101669)	1605	ABC transporter	similar to sll1276	AGF51262.1	1.09426	1.01715	17.2157	43	18.8385	56	17.511	73
2579	MYO_126170	CP003265	2882290..2883078	789	OmpR subfamily	similar to slr0081	AGF52846.1	1.41526	1.01711	307.041	377	434.541	635	312.295	640
339	MYO_13450	CP003265	369149..370219	1071	hypothetical protein	similar to slr1065	AGF50606.1	1.37092	1.01697	45.5991	76	62.5125	124	46.3728	129
476	gpsA	CP003265	529198..530190	993	NAD+ dependent glycerol-3-phosphate dehydrogenase	similar to slr1755	AGF50743.1	1.12769	1.01697	49.1809	76	55.4607	102	50.0153	129
2311	MYO_123470	CP003265	2580298..2580603	306	hypothetical protein	similar to slr0059	AGF52578.1	1.27309	1.01673	69.2986	33	88.2232	50	70.4578	56
1374	MYO_113890	CP003265	1521459..1521779	321	hypothetical protein	similar to slr0270	AGF51641.1	1.101	1.01648	290.265	145	319.582	190	295.048	246
3165	MYO_260	CP003266 (pSYSM_M)	2528..13921	11394	hypothetical protein	similar to slr5005	AGF53432.1	1.05335	1.01632	34.9097	619	36.7722	776	35.4794	1050
2985	MYO_130330	CP003265	3367326..3368213	888	hypothetical protein	similar to slr1563	AGF53252.1	1.06265	1.01619	73.8106	102	78.4352	129	75.006	173
1903	purB	CP003265	complement(2090897..2092192)	1296	adenylosuccinate lyase	similar to sll0421	AGF52170.1	0.848476	1.01619	50.574	102	42.9108	103	51.393	173
104	xerC	CP003265	120719..121660	942	integrase-recombinase protein	similar to slr0733	AGF50371.1	1.53435	1.01594	15.6895	23	24.0731	42	15.9396	39
2684	MYO_127230	CP003265	3000234..3001721	1488	hypothetical protein	similar to slr0121	AGF52951.1	1.12832	1.01569	45.3438	105	51.1624	141	46.0553	178
1965	MYO_119910	CP003265	2170465..2174040	3576	beta transducin-like protein	similar to slr0143	AGF52232.1	1.19888	1.01562	29.4699	164	35.3307	234	29.9302	278
2125	MYO_121530	CP003265	2374978..2376207	1230	hypothetical protein	similar to slr0377	AGF52392.1	0.783881	1.01562	85.6782	164	67.1616	153	87.0166	278
1216	MYO_112300	CP003265	complement(1342610..1343536)	927	hypothetical protein	similar to sll0854	AGF51483.1	1.11082	1.0155	40.8982	59	45.4307	78	41.532	100
1715	MYO_117370	CP003265	1884622..1885206	585	hypothetical protein	similar to slr1288	AGF51982.1	1.21051	1.0155	64.8079	59	78.4508	85	65.8123	100
2405	gyrA_2	CP003265	2685220..2687802	2583	DNA gyrase A subunit	similar to slr0417	AGF52672.1	1.06553	1.01525	113.193	455	120.611	577	114.919	771
3457	MYO_3160	CP003269 (pSYSX_M)	16436..18091	1656	hypothetical protein	similar to slr6015	AGF53724.1	1.19034	1.01522	13.9693	0	16.6282	0	14.1818	0
2833	ndhF_4	CP003265	complement(3175499..3177403)	1905	NADH dehydrogenase subunit 5	similar to sll0026	AGF53100.1	0.847577	1.01514	77.2453	229	65.4714	231	78.415	388
795	MYO_18040	CP003265	874348..875016	669	hypothetical protein	similar to slr1194	AGF51062.1	1.22082	1.01502	163.288	170	199.345	247	165.741	288
1528	psaJ	CP003265	complement(1685795..1685917)	123	photosystem I subunit IX	similar to sml0008	AGF51795.1	1.22417	1.01469	5762.38	1103	7054.16	1607	5847.02	1868
1695	MYO_117170	CP003265	1863502..1863942	441	hypothetical protein	similar to slr1273	AGF51962.1	1.32794	1.01464	670.272	460	890.082	727	680.082	779
957	menB	CP003265	complement(1052582..1053409)	828	naphthoate synthase	similar to sll1127	AGF51224.1	1.24235	1.01426	108.65	140	134.982	207	110.2	237
118	infB	CP003265	134437..137442	3006	initiation factor IF-2	similar to slr0744	AGF50385.1	1.06344	1.01414	235.786	1103	250.744	1396	239.121	1867
1600	act	CP003265	complement(1755063..1755692)	630	acetyltransferase	similar to sll1900	AGF51867.1	1.35731	1.01394	13.2597	13	17.9975	21	13.4445	22
2657	eda	CP003265	complement(2968743..2969363)	621	4-hydroxy-2-oxoglutarate aldolase	similar to sll0107	AGF52924.1	1.09877	1.01394	26.9038	26	29.5612	34	27.2787	44
353	MYO_13590	CP003265	382643..382873	231	hypothetical protein	similar to ssr1766	AGF50620.1	1.03414	1.01394	72.3258	26	74.795	32	73.3337	44
273	MYO_12770	CP003265	complement(302367..302789)	423	hypothetical protein	similar to sll1192	AGF50540.1	0.904872	1.01394	19.7485	13	17.8699	14	20.0237	22
2363	pstB_3	CP003265	complement(2635011..2635820)	810	phosphate transport ATP-binding protein PstB	similar to sll0683	AGF52630.1	0.807922	1.01394	41.2525	52	33.3288	50	41.8273	88
1017	MYO_110300	CP003265	complement(1132569..1133345)	777	hypothetical protein	similar to sll0875	AGF51284.1	0.88607	1.0131	45.4856	55	40.3034	58	46.0813	93
2122	MYO_121500	CP003265	2372337..2372717	381	hypothetical protein	similar to slr0373	AGF52389.1	0.840421	1.01281	31087	18432	26126.2	18436	31485.3	31158
1839	fbp_2	CP003265	2020497..2021540	1044	fructose 1,6-bisphosphatase	similar to slr0952	AGF52106.1	0.98728	1.01255	123.101	200	121.535	235	124.646	338
978	MYO_19890	CP003265	1080350..1081351	1002	hypothetical protein	similar to slr1444	AGF51245.1	1.36177	1.01235	18.5978	29	25.3259	47	18.8274	49
1452	hglK	CP003265	1609196..1609933	738	HglK	similar to slr1519	AGF51719.1	1.10195	1.01167	53.1135	61	58.5286	80	53.7333	103
1529	psaF	CP003265	complement(1686025..1686522)	498	photosystem I subunit III	similar to sll0819	AGF51796.1	1.25224	1.01157	5610.38	4348	7025.55	6480	5675.3	7341
1945	alaS	CP003265	complement(2138881..2141514)	2634	alanyl-tRNA synthetase	similar to sll0362	AGF52212.1	1.15629	1.0114	26.5915	109	30.7475	150	26.8946	184
1415	MYO_114310	CP003265	1566786..1567892	1107	regulatory components of sensory transduction system	similar to slr2100	AGF51682.1	1.31287	1.01105	9.28761	16	12.1935	25	9.39029	27
2299	gst	CP003265	complement(2570917..2571471)	555	glutathione S-transferase	similar to sll0067	AGF52566.1	0.945268	1.01105	129.675	112	122.578	126	131.109	189
2077	MYO_121050	CP003265	2299905..2300546	642	hypothetical protein	similar to slr0169	AGF52344.1	1.0503	1.01105	64.0585	64	67.2805	80	64.7666	108
537	MYO_15440	CP003265	586730..592627	5898	Fat protein	similar to slr2046	AGF50804.1	1.19957	1.0109	51.2065	470	61.426	671	51.7644	793
1687	rpoC1	CP003265	1852571..1854451	1881	RNA polymerase gamma-subunit	similar to slr1265	AGF51954.1	1.01448	1.01035	324.539	950	329.237	1147	327.896	1602
765	rps3	CP003265	complement(838333..839055)	723	30S ribosomal protein S3	similar to sll1804	AGF51032.1	1.15156	1.01028	470.164	529	541.42	725	474.995	892
669	MYO_16780	CP003265	complement(742281..744233)	1953	ABC transporter	similar to sll1927	AGF50936.1	0.951972	1.01026	61.8568	188	58.886	213	62.4913	317
1450	MYO_114660	CP003265	1608008..1608274	267	hypothetical protein	similar to ssr2554	AGF51717.1	1.08262	1.01009	375.444	156	406.461	201	379.234	263
903	def	CP003265	993998..994561	564	polypeptide deformylase	similar to slr1549	AGF51170.1	0.96769	1.00979	202.802	178	196.25	205	204.788	300
2887	trpC	CP003265	3237450..3238337	888	indole-3-glycerol phosphate synthase	similar to slr0546	AGF53154.1	1.23825	1.00908	13.749	19	17.0247	28	13.8739	32
2736	MYO_127750	CP003265	3064017..3064445	429	transposase	similar to slr0800	AGF53003.1	1.10558	1.00908	28.4596	13	31.4642	14	28.7181	17
2924	MYO_129650	CP003265	complement(3282319..3284436)	2118	hypothetical protein	similar to sll1336	AGF53191.1	1.05909	1.00879	65.2295	215	69.084	271	65.8029	362
2948	MYO_129900	CP003265	complement(3314631..3314861)	231	NifU protein	similar to ssl2667	AGF53215.1	1.2475	1.00876	545.225	196	680.167	291	550.002	330
1161	MYO_111740	CP003265	complement(1285338..1287233)	1896	extracellular solute-binding protein	similar to sll1699	AGF51428.1	0.756215	1.00856	20.335	60	15.3776	54	20.5091	101
2334	uvrB	CP003265	complement(2607974..2609983)	2010	excinuclease ABC subunit B	similar to sll0459	AGF52601.1	0.938266	1.00856	19.1817	60	17.9975	67	19.3459	101
1712	pbp	CP003265	complement(1881798..1883042)	1245	penicillin-binding protein 4	similar to sll1167	AGF51979.1	1.14578	1.00765	11.3549	22	13.0103	30	11.4418	37
2048	MYO_120760	CP003265	2264757..2266352	1596	hypothetical protein	similar to slr0320	AGF52315.1	1.33187	1.00707	37.8466	94	50.4066	149	38.1142	158
2298	MYO_123330	CP003265	complement(2567040..2570759)	3720	hypothetical protein	similar to sll0068	AGF52565.1	0.966089	1.00693	78.4232	454	75.7638	522	78.9668	763
1206	murI	CP003265	1332992..1333831	840	glutamate racemase	similar to slr1746	AGF51473.1	0.942603	1.00668	150.702	197	142.052	221	151.709	331
1974	MYO_120000	CP003265	2179331..2181226	1896	serine/threonine protein kinase	similar to slr0152	AGF52241.1	0.885051	1.00656	25.4188	75	22.4969	79	25.5856	126
580	MYO_15880	CP003265	complement(638276..639085)	810	hypothetical protein	similar to sll0994	AGF50847.1	0.773019	1.00656	19.8329	25	15.3312	23	19.9631	42
50	MYO_1500	CP003265	60524..61522	999	ABC transporter	similar to slr1113	AGF50317.1	0.800852	1.00637	82.3334	128	65.9369	122	82.8582	215
576	MYO_15840	CP003265	complement(634394..635749)	1356	hypothetical protein	similar to sll0996	AGF50843.1	1.02337	1.00625	36.963	78	37.8267	95	37.1941	131
2819	MYO_128580	CP003265	complement(3156618..3157919)	1302	hypothetical protein	similar to sll0036	AGF53086.1	0.856092	1.00611	26.1575	53	22.3933	54	26.3173	89
2622	abfB	CP003265	2928744..2929277	534	arabinofuranosidase	similar to slr0518	AGF52889.1	0.900256	1.00571	33.6937	28	30.3329	30	33.8859	47
1139	MYO_111520	CP003265	complement(1261884..1262300)	417	hypothetical protein	similar to sll2007	AGF51406.1	0.840239	1.00571	43.1473	28	36.254	28	43.3935	47
84	lepB_1	CP003265	complement(98609..99199)	591	leader peptidase I	similar to sll0716	AGF50351.1	0.797515	1.00534	64.15	59	51.1605	56	64.4927	99
3376	MYO_4870	CP003267 (pSYSA_M)	complement(81347..82459)	1113	hypothetical protein	similar to sll7089	AGF53643.1	1.08764	1.00523	103.922	180	113.03	233	104.466	302
880	MYO_18900	CP003265	complement(970537..970944)	408	DNA binding protein HU	similar to sll1712	AGF51147.1	1.07965	1.00459	1149.73	730	1241.3	938	1155.01	1224
979	MYO_19900	CP003265	1081542..1081796	255	hypothetical protein	similar to ssr2422	AGF51246.1	0.963803	1.00445	85.6782	34	82.5769	39	86.0592	57
1735	MYO_117570	CP003265	1907659..1908564	906	hypothetical protein	similar to slr1534	AGF52002.1	0.936266	1.00428	74.472	105	69.7256	117	74.7906	176
1181	MYO_111940	CP003265	complement(1304906..1307818)	2913	PleD-like protein	similar to sll1687	AGF51448.1	1.14201	1.0042	31.3242	142	35.7727	193	31.4557	238
841	rpl11	CP003265	complement(924544..924969)	426	50S ribosomal protein L11	similar to sll1743	AGF51108.1	1.0974	1.00402	497.779	330	546.263	431	499.779	553
1115	MYO_111280	CP003265	1237626..1237853	228	ferredoxin	similar to ssr3184	AGF51382.1	1.10518	1.00397	312.838	111	345.742	146	314.08	186
1779	MYO_118010	CP003265	1954159..1954650	492	hypothetical protein	similar to slr1676	AGF52046.1	1.14904	1.00369	152.81	117	175.586	160	153.375	196
579	MYO_15870	CP003265	complement(637495..638190)	696	hypothetical protein	similar to sll0995	AGF50846.1	1.04132	1.00369	108.021	117	112.485	145	108.42	196
2712	MYO_127510	CP003265	3038072..3038683	612	hypothetical protein	similar to slr0318	AGF52979.1	1.19734	1.00357	41.9991	40	50.2872	57	42.1489	67
1462	MYO_114790	CP003265	1618745..1619008	264	hypothetical protein	similar to ssr3571	AGF51729.1	1.13335	1.00322	104.664	43	118.62	58	105	72
421	lipA_1	CP003265	462911..463780	870	lipoic acid synthetase	similar to slr1598	AGF50688.1	0.986792	1.00322	63.5201	86	62.6811	101	63.7244	144
244	MYO_12470	CP003265	complement(269773..270435)	663	hypothetical protein	similar to sll1663	AGF50511.1	0.97134	1.00282	136.659	141	132.742	163	137.044	236
556	MYO_15630	CP003265	complement(614768..615205)	438	hypothetical protein	similar to sll1837	AGF50823.1	1.34438	1.00278	139.374	95	187.372	152	139.761	159
1980	pyrH	CP003265	complement(2189936..2190718)	783	uridine monophosphate kinase	similar to sll0144	AGF52247.1	0.964063	1.00278	77.9639	95	75.1621	109	78.1804	159
2389	MYO_124260	CP003265	complement(2664810..2666240)	1431	hypothetical protein	similar to sll0606	AGF52656.1	0.788795	1.00265	22.0033	49	17.3561	46	22.0616	82
1027	MYO_110400	CP003265	complement(1142156..1142548)	393	hypothetical protein	similar to sll0872	AGF51294.1	1.22292	1.00253	165.143	101	201.957	147	165.561	169
657	MYO_16660	CP003265	728162..728986	825	hypothetical protein	similar to slr1704	AGF50924.1	0.84567	1.00232	1204.95	1547	1018.99	1557	1207.74	2588
3399	MYO_570	CP003268 (pSYSG_M)	complement(4652..6046)	1395	type I restriction-modification system S subunit	similar to sll8006	AGF53666.1	1.31892	1.0022	76.0049	165	100.244	259	76.1724	276
1304	fabG_2	CP003265	1437173..1437895	723	3-ketoacyl-acyl carrier protein reductase	similar to slr1994	AGF51571.1	1.51518	1.00185	54.2155	61	82.1464	110	54.3156	102
2792	mraY	CP003265	complement(3119240..3120337)	1098	phospho-N-acetylmuramoyl-pentapeptide- transferase	similar to sll0657	AGF53059.1	1.00553	1.00185	35.6993	61	35.8967	73	35.7652	102
1808	MYO_118300	CP003265	1984343..1985341	999	hypothetical protein	similar to slr1692	AGF52075.1	1.01091	1.00169	41.1667	64	41.6159	77	41.2364	107
2926	MYO_129670	CP003265	complement(3286524..3288053)	1530	hypothetical protein	similar to sll1334	AGF53193.1	1.13375	1.00131	61.3187	146	69.5199	197	61.399	244
1439	fabH	CP003265	1596534..1597397	864	beta-ketoacyl-acyl carrier protein synthase III	similar to slr1511	AGF51706.1	1.00138	1.00131	54.2926	73	54.3676	87	54.3637	122
271	MYO_12750	CP003265	299522..300883	1362	UDP-glucose dehydrogenase	similar to slr1299	AGF50538.1	0.712607	1.0011	37.2719	79	26.5602	67	37.3129	132
1845	cysS	CP003265	2025144..2026595	1452	cysteinyl-tRNA synthetase	similar to slr0958	AGF52112.1	1.25011	1.00101	36.2893	82	45.3657	122	36.3259	137
366	sucC	CP003265	complement(392001..393206)	1206	succinate--CoA ligase	similar to sll1023	AGF50633.1	0.93909	1.00092	45.2901	85	42.5315	95	45.3319	142
2823	MYO_128620	CP003265	complement(3161672..3162859)	1188	hypothetical protein	similar to sll0031	AGF53090.1	0.781787	1.00031	62.2033	115	48.6297	107	62.2225	192
2580	MYO_126180	CP003265	2883450..2884781	1332	hypothetical protein	similar to slr0082	AGF52847.1	0.846301	1.0003	334.319	693	282.934	698	334.42	1157
700	MYO_17090	CP003265	complement(775188..775562)	375	hypothetical protein	similar to sll1912	AGF50967.1	1.82052	0.998573	10.2814	6	18.7174	13	10.2667	10
2589	MYO_126270	CP003265	2895978..2897348	1371	aldehyde dehydrogenase	similar to slr0091	AGF52856.1	1.54044	0.998573	2.8122	6	4.33201	11	2.80818	10
887	MYO_18970	CP003265	978596..979228	633	hypothetical protein	similar to slr1541	AGF51154.1	1.43541	0.998573	48.727	48	69.943	82	48.6574	80
1251	MYO_112650	CP003265	1382298..1383206	909	transcriptional regulator	similar to slr1245	AGF51518.1	0.840239	0.998573	4.2415	6	3.56387	6	4.23544	10
1843	MYO_118650	CP003265	2023462..2024616	1155	hypothetical protein	similar to slr0955	AGF52110.1	0.732516	0.998573	43.3955	78	31.7879	68	43.3335	130
2830	nrtC_2	CP003265	3170603..3172606	2004	nitrate transport protein NrtC	similar to slr0043	AGF53097.1	0.728207	0.998573	4.80978	15	3.50252	13	4.80292	25
2755	MYO_127940	CP003265	3086361..3086783	423	hypothetical protein	similar to slr0699	AGF53022.1	1.68048	0.998573	4.55735	3	7.65853	6	4.55085	5
2921	MYO_129620	CP003265	complement(3280372..3280674)	303	hypothetical protein	similar to sll1340	AGF53188.1	1.54044	0.998573	12.7245	6	19.6013	11	12.7063	10
2669	MYO_127080	CP003265	2983506..2984462	957	hypothetical protein	similar to slr0109	AGF52936.1	1.51243	0.998573	10.0719	15	15.233	27	10.0575	25
2487	MYO_125240	CP003265	2784066..2785685	1620	hypothetical protein	similar to slr0913	AGF52754.1	1.21368	0.998573	3.56993	9	4.33274	13	3.56483	15
1623	MYO_116420	CP003265	complement(1781911..1782141)	231	hypothetical protein	similar to ssl3549	AGF51890.1	1.15817	0.998573	308.775	111	357.613	153	308.335	185
2562	kdtB	CP003265	2864640..2865119	480	KdtB protein	similar to slr0847	AGF52829.1	1.14578	0.998573	44.1778	33	50.6181	45	44.1148	55
814	MYO_18230	CP003265	893238..893627	390	hypothetical protein	similar to slr1210	AGF51081.1	1.12032	0.998573	9.88595	6	11.0754	8	9.87184	10
1885	MYO_119080	CP003265	2070429..2071871	1443	hypothetical protein	similar to slr1648	AGF52152.1	1.12032	0.998573	37.4063	84	41.907	112	37.3529	140
2741	merR_2	CP003265	complement(3067549..3068589)	1041	nitrilase	similar to sll0784	AGF53008.1	1.12032	0.998573	5.55551	9	6.22393	12	5.54758	15
1217	MYO_112310	CP003265	complement(1343587..1344147)	561	hypothetical protein	similar to sll0853	AGF51484.1	1.08737	0.998573	58.417	51	63.5207	66	58.3336	85
1610	MYO_116290	CP003265	1766760..1767164	405	hypothetical protein	similar to slr1964	AGF51877.1	1.07656	0.998573	152.317	96	163.978	123	152.099	160
3532	MYO_3910	CP003269 (pSYSX_M)	82675..86385	3711	hypothetical protein	similar to slr6090	AGF53799.1	1.01529	0.998573	12.4673	72	12.6579	87	12.4495	120
1616	MYO_116350	CP003265	complement(1774550..1775308)	759	hypothetical protein	similar to sll1891	AGF51883.1	0.997783	0.998573	162.552	192	162.191	228	162.32	320
1100	MYO_111130	CP003265	complement(1225156..1225452)	297	hypothetical protein	similar to ssl3379	AGF51367.1	0.920261	0.998573	45.4354	21	41.8125	23	45.3706	35
2744	MYO_127830	CP003265	complement(3070897..3072006)	1110	putative protein kinase	similar to sll0782	AGF53011.1	0.840239	0.998573	3.47344	6	2.91852	6	3.46848	10
1461	MYO_114780	CP003265	1618506..1618691	186	hypothetical protein	similar to ssr3570	AGF51728.1	0.840239	0.998573	31.0929	9	26.1255	9	31.0485	15
2060	xylR	CP003265	2281061..2282044	984	xylose repressor	similar to slr0329	AGF52327.1	0.793559	0.998573	23.5093	36	18.656	34	23.4757	60
1234	pyrF	CP003265	complement(1362307..1363002)	696	orotidine 5' monophosphate decarboxylase	similar to sll0838	AGF51501.1	0.653519	0.998573	66.4745	72	43.4423	56	66.3796	120
2869	MYO_129100	CP003265	complement(3221698..3222603)	906	hypothetical protein	similar to sll0494	AGF53136.1	0.640182	0.998573	14.8944	21	9.53512	16	14.8731	35
1723	desB	CP003265	complement(1893989..1895068)	1080	delta 15 desaturase	similar to sll1441	AGF51990.1	0.630179	0.998573	14.2797	24	8.99877	18	14.2593	40
618	MYO_16270	CP003265	682356..682619	264	hypothetical protein	similar to ssr2318	AGF50885.1	0.560159	0.998573	14.6042	6	8.1807	4	14.5834	10
3470	MYO_3290	CP003269 (pSYSX_M)	26096..26653	558	hypothetical protein	similar to slr6028	AGF53737.1	0.28008	0.998573	3.45477	0	0.96761	0	3.44984	0
3295	MYO_460	CP003267 (pSYSA_M)	2399..2965	567	hypothetical protein	similar to slr7005	AGF53562.1	0	0.998573	3.39993	3	0	0	3.39508	5
558	MYO_15650	CP003265	615958..616311	354	hypothetical protein	similar to slr1913	AGF50825.1	1.54044	0.998573	21.7826	12	33.5547	22	21.7515	20
1422	apt	CP003265	complement(1577194..1577712)	519	adenine phosphoribosyltransferase	similar to sll1430	AGF51689.1	1.36539	0.998573	29.715	24	40.5725	39	29.6726	40
2599	MYO_126370	CP003265	complement(2906761..2907069)	309	hypothetical protein	similar to sll0486	AGF52866.1	1.30704	0.998573	18.7161	9	24.4627	14	18.6894	15
557	MYO_15640	CP003265	615470..615826	357	anti-sigma F factor antagonist	similar to slr1912	AGF50824.1	1.25212	0.998573	91.7981	51	114.942	76	91.6671	85
3120	MYO_131680	CP003265	complement(3527070..3527846)	777	hypothetical protein	similar to sll1107	AGF53387.1	0.993009	0.998573	27.2913	33	27.1005	39	27.2524	55
2716	MYO_127550	CP003265	complement(3040796..3041194)	399	hypothetical protein	similar to sll0800	AGF52983.1	0.910258	0.998573	19.3259	12	17.5916	13	19.2983	20
593	tyrS_2	CP003265	662454..662690	237	tyrosyl tRNA synthetase	similar to ssr1720	AGF50860.1	0.840239	0.998573	8.13401	2	6.83451	3	8.1224	5
2683	MYO_127220	CP003265	2999343..3000065	723	hypothetical protein	similar to slr0120	AGF52950.1	0.840239	0.998573	10.6653	12	8.96143	12	10.6501	20
1281	suhB_1	CP003265	complement(1408657..1409460)	804	extragenic suppressor	similar to sll1959	AGF51548.1	0.770219	0.998573	19.1817	24	14.7741	22	19.1543	40
7	rfbD_1	CP003265	complement(5534..6622)	1089	GDP-D-mannose dehydratase	similar to sll1212	AGF50274.1	0.928685	0.998573	134.536	228	124.942	252	134.344	380
3477	MYO_3360	CP003269 (pSYSX_M)	complement(32660..32893)	234	hypothetical protein	similar to ssl6035	AGF53744.1	0.840239	0.998573	16.4766	6	13.8443	6	16.4531	10
515	psbE	CP003265	570160..570405	246	cytochrome b559 a subunit	similar to ssr3451	AGF50782.1	1.07863	0.997644	1123.22	430	1211.54	552	1120.57	716
2368	MYO_124040	CP003265	2640671..2641837	1167	hypothetical protein	similar to slr0719	AGF52635.1	1.0503	0.996851	63.8732	116	67.0859	145	63.6721	193
291	sir	CP003265	321699..323606	1908	ferredoxin-sulfite reductase	similar to slr0963	AGF50558.1	0.980668	0.996347	120.906	359	118.569	419	120.464	597
3141	fur_2	CP003265	complement(3548548..3549045)	498	ferric uptake regulation protein	similar to sll0567	AGF53408.1	1.28994	0.99576	91.6138	71	118.177	109	91.2253	118
2555	ndhF_3	CP003265	2855142..2857187	2046	NADH dehydrogenase subunit 5	similar to slr0844	AGF52822.1	1.08411	0.995535	495.602	1578	537.287	2036	493.389	2622
1295	apcA	CP003265	1428888..1429373	486	allophycocyanin a chain	similar to slr2067	AGF51562.1	1.19874	0.995247	11115.7	8407	13324.8	11994	11062.9	13965
518	psbJ	CP003265	570738..570857	120	photosystem II PsbJ protein	similar to smr0008	AGF50785.1	0.939928	0.995188	631.877	118	593.919	132	628.836	196
2144	MYO_121720	CP003265	complement(2394747..2396387)	1641	hypothetical protein	similar to sll0772	AGF52411.1	0.660187	0.995006	21.9286	56	14.477	44	21.8191	93
696	MYO_17050	CP003265	complement(770431..770982)	552	hypothetical protein	similar to sll1915	AGF50963.1	1.36341	0.994804	61.6976	53	84.1189	86	61.3771	88
2861	trpB	CP003265	3210541..3211779	1239	tryptophan synthase beta subunit	similar to slr0543	AGF53128.1	1.13528	0.994761	135.882	262	154.265	354	135.17	435
1372	galE_3	CP003265	complement(1519679..1520695)	1017	UDP-glucose 4-epimerase	similar to sll0244	AGF51639.1	1.0419	0.994578	31.5923	50	32.9159	62	31.421	83
3003	MYO_130510	CP003265	complement(3385961..3386758)	798	hypothetical protein	similar to sll1486	AGF53270.1	1.4116	0.994578	40.2623	50	56.8343	84	40.044	83
766	rpl22	CP003265	complement(839085..839450)	366	50S ribosomal protein L22	similar to sll1803	AGF51033.1	1.00174	0.994423	675.945	385	677.121	459	672.175	639
1651	psbA3	CP003265	complement(1817384..1818466)	1083	photosystem II D1 protein	similar to sll1867	AGF51918.1	1.2018	0.994375	16797.4	9959	20187.2	15513	16703	17295
472	ycf22	CP003265	complement(521585..522955)	1371	YCF22 protein	similar to sll1002	AGF50739.1	1.1084	0.994323	22.0289	47	24.4168	62	21.9038	78
2660	MYO_126980	CP003265	complement(2973009..2974271)	1263	hypothetical protein	similar to sll0103	AGF52927.1	1.25112	0.994183	92.5976	182	115.851	271	92.059	302
3130	MYO_131780	CP003265	3535587..3536303	717	hypothetical protein	similar to slr0590	AGF53397.1	1.29855	0.994034	39.4335	44	51.2064	68	39.1982	73
1324	MYO_113390	CP003265	complement(1462795..1463328)	534	hypothetical protein	similar to sll1609	AGF51591.1	0.881226	0.993701	49.3372	41	43.4772	43	49.0264	68
1657	petG	CP003265	1822039..1822155	117	PetG subunit of the cytochrome b6f complex	similar to smr0010	AGF51924.1	0.882101	0.993597	1543.31	281	1361.35	295	1533.43	466
1519	MYO_115360	CP003265	complement(1676513..1677034)	522	putative NAD-reducing hydrogenase subunit	similar to sll1220	AGF51786.1	1.01713	0.993317	93.5567	76	95.1594	92	92.9314	126
2170	MYO_121990	CP003265	complement(2420100..2420699)	600	hypothetical protein	similar to sll0749	AGF52437.1	1.30064	0.993101	78.1814	73	101.686	113	77.642	121
1925	MYO_119500	CP003265	complement(2118909..2120615)	1707	potassium channel	similar to sll0261	AGF52192.1	1.00829	0.992866	13.1755	35	13.2847	42	13.0815	58
68	purL_1	CP003265	complement(78467..80800)	2334	phosphoribosylformyl glycinamidine synthetase II	similar to sll1056	AGF50335.1	1.00998	0.992521	27.2563	99	27.5284	119	27.0524	164
272	ubiH	CP003265	301110..302354	1245	UbiH protein	similar to slr1300	AGF50539.1	0.857213	0.992521	51.0973	99	43.8012	101	50.7151	164
934	iaP75	CP003265	1030857..1033442	2586	IaP75	similar to slr1227; similar to chloroplast import-associated channel IAP75	AGF51201.1	0.925714	0.992439	129.462	521	119.844	574	128.483	863
2158	MYO_121870	CP003265	2409446..2410066	621	hypothetical protein	similar to slr0779	AGF52425.1	0.924262	0.992331	165.562	160	153.023	176	164.292	265
2123	MYO_121510	CP003265	2372808..2374313	1506	cell division cycle protein	similar to slr0374	AGF52390.1	0.818204	0.992293	17832.4	41793	14590.6	40697	17695	69217
2898	MYO_129390	CP003265	3251829..3254939	3111	hypothetical protein	similar to slr0554	AGF53165.1	0.977983	0.992025	25.1995	122	24.6447	142	24.9985	202
406	btpA	CP003265	complement(445163..446026)	864	BtpA	similar to sll0634; affect to accumulation of PsaA and PsaB	AGF50673.1	1.08297	0.991915	66.9361	90	72.4901	116	66.395	149
2721	MYO_127600	CP003265	complement(3046170..3047534)	1365	sensory transduction histidine kinase	similar to sll0798	AGF52988.1	1.30382	0.991686	13.652	29	17.7998	45	13.5385	48
2596	hisB_2	CP003265	2904065..2904697	633	imidazoleglycerol-phosphate dehydratase	similar to slr0500	AGF52863.1	1.14032	0.99144	85.2722	84	97.2379	114	84.5422	139
1804	psaE	CP003265	1980518..1980742	225	photosystem I subunit IV	similar to ssr2831	AGF52071.1	1.11768	0.991226	3338.6	1169	3731.49	1555	3309.3	1934
2651	MYO_126890	CP003265	2960665..2961780	1116	hypothetical protein	similar to slr0624	AGF52918.1	0.951039	0.990891	104.795	182	99.6638	206	103.84	301
1233	MYO_112470	CP003265	complement(1361735..1362328)	594	hypothetical protein	similar to sll0839	AGF51500.1	0.646337	0.990891	28.1267	26	18.1793	20	27.8705	43
1751	MYO_117730	CP003265	1922720..1923319	600	hypothetical protein	similar to slr1161	AGF52018.1	1.13141	0.990663	108.169	101	122.383	136	107.159	167
1720	pyrG	CP003265	complement(1888930..1890588)	1659	CTP synthetase	similar to sll1443	AGF51987.1	1.13152	0.990584	58.1001	150	65.7415	202	57.553	248
2441	MYO_124780	CP003265	2724315..2725976	1662	ComE ORF1	similar to slr0197	AGF52708.1	0.840239	0.990251	27.8377	72	23.3903	72	27.5663	119
155	MYO_11560	CP003265	170572..171840	1269	hypothetical protein	similar to slr1411	AGF50422.1	0.723539	0.990251	36.4588	72	26.3794	62	36.1034	119
2784	ycf35	CP003265	complement(3113241..3113627)	387	Ycf35	similar to sll0661	AGF53051.1	1.01978	0.990038	582.811	351	594.337	426	577.005	580
2748	MYO_127870	CP003265	complement(3076106..3078478)	2373	ABC transporter	similar to sll0778	AGF53015.1	1.24209	0.989889	6.22819	23	7.73598	34	6.16522	38
2167	MYO_121960	CP003265	complement(2415803..2417161)	1359	hypothetical protein	similar to sll0751	AGF52434.1	1.18729	0.989889	43.5011	92	51.6486	130	43.0613	152
3143	purH	CP003265	3549942..3551603	1662	phosphoribosyl aminoimidazole carboxy formyl formyltransferase/inosinemonophosphate cyclohydrolase PUR-H(J)	similar to slr0597	AGF53410.1	1.11782	0.989657	43.3031	112	48.4049	149	42.8552	185
346	yefA	CP003265	375470..376432	963	GDP-D-mannose dehydratase	similar to slr1072	AGF50613.1	1.16123	0.989597	59.3876	89	68.9625	123	58.7697	147
661	dfrA	CP003265	732902..733933	1032	dihydroflavonol 4-reductase	similar to slr1706	AGF50928.1	0.703456	0.989283	26.7744	43	18.8346	36	26.4875	71
1747	purD	CP003265	1919129..1920388	1260	glycinamide ribonucleotide synthetase	similar to slr1159	AGF52014.1	0.879319	0.989283	21.9295	43	19.2831	45	21.6945	71
706	argH	CP003265	783034..784419	1386	L-argininosuccinate lyase	similar to slr1133	AGF50973.1	1.0503	0.988587	37.0901	80	38.9557	100	36.6668	132
830	manA	CP003265	913707..914096	390	mannose-6-phosphate isomerase	similar to slr2074	AGF51097.1	0.924262	0.988587	65.9063	40	60.9147	44	65.1541	66
3288	MYO_21290	CP003266 (pSYSM_M)	complement(115503..116540)	1038	hypothetical protein	similar to sll5128	AGF53555.1	0.920687	0.987949	58.1919	94	53.5765	103	57.4906	155
2854	MYO_128930	CP003265	complement(3202009..3202920)	912	hypothetical protein	similar to sll0505	AGF53121.1	1.52151	0.987777	26.0699	37	39.6656	67	25.7512	61
3122	MYO_131700	CP003265	3528691..3529701	1011	zinc-containing alcohol dehydrogenase family	similar to slr1192	AGF53389.1	1.08203	0.987078	88.3477	139	95.5952	179	87.2061	229
964	MYO_19750	CP003265	1059577..1060428	852	hypothetical protein	similar to slr1436	AGF51231.1	1.5322	0.986825	12.8216	17	19.6452	31	12.6526	28
2825	MYO_128640	CP003265	3163875..3164948	1074	hypothetical protein	similar to slr0039	AGF53092.1	1.18622	0.986825	91.5417	153	108.589	216	90.3356	252
388	MYO_13940	CP003265	complement(422874..423611)	738	OmpR subfamily	similar to sll0649	AGF50655.1	0.790813	0.986825	14.8021	17	11.7057	16	14.6071	28
2950	MYO_129920	CP003265	3316097..3316480	384	hypothetical protein	similar to slr0651	AGF53217.1	0.691961	0.986825	28.4479	17	19.6848	14	28.073	28
2695	MYO_127340	CP003265	3015472..3016482	1011	hypothetical protein	similar to slr0304	AGF52962.1	1.08737	0.986825	10.8051	17	11.7491	22	10.6628	28
1590	desA	CP003265	1744777..1745832	1056	fatty acid desaturase	similar to slr1350	AGF51857.1	0.731587	0.986521	70.5872	116	51.6407	101	69.6357	191
1387	MYO_114020	CP003265	complement(1534586..1536262)	1677	hypothetical protein	similar to sll0236	AGF51654.1	1.31853	0.986282	24.9065	65	32.8399	102	24.5648	107
2916	gap2	CP003265	complement(3275390..3276403)	1014	glyceraldehyde-3-phosphate dehydrogenase (NADP+)(phosphorylating)	similar to sll1342	AGF53183.1	1.11621	0.986113	690.749	1090	771.019	1448	681.157	1794
3093	MYO_131410	CP003265	3500331..3503060	2730	cation or drug efflux system protein	similar to slr0454	AGF53360.1	0.947178	0.985863	25.8918	110	24.5241	124	25.5258	181
2007	MYO_120330	CP003265	complement(2222056..2222379)	324	hypothetical protein	similar to sll1863	AGF52274.1	0.840239	0.985688	61.4821	31	51.6596	31	60.6021	51
2527	MYO_125650	CP003265	2822291..2822623	333	hypothetical protein	similar to slr0581	AGF52794.1	0.677612	0.985688	179.461	93	121.605	75	176.893	153
2217	rbcX	CP003265	2477295..2477711	417	putative Rubisco chaperonin	similar to slr0011	AGF52484.1	1.22276	0.985556	1584.12	1028	1937	1496	1561.24	1691
327	MYO_13330	CP003265	357245..357697	453	hypothetical protein	similar to slr1611	AGF50594.1	0.821567	0.985258	63.8331	45	52.4432	44	62.8921	74
1916	priA	CP003265	complement(2104932..2107427)	2496	primosomal protein N'	similar to sll0270	AGF52183.1	1.12032	0.985258	11.5851	45	12.979	60	11.4143	74
2884	dnaJ_4	CP003265	complement(3234394..3235527)	1134	DnaJ protein	similar to sll0897	AGF53151.1	0.95534	0.984893	82.7316	146	79.0368	166	81.4818	240
2587	erg6	CP003265	2893925..2894878	954	delta(24)-sterol C-methyltransferase	similar to slr0089	AGF52854.1	0.851749	0.984893	49.1707	73	41.8811	74	48.4279	120
1109	MYO_111220	CP003265	complement(1231254..1232402)	1149	hypothetical protein	similar to sll1762	AGF51376.1	1.07203	0.984799	48.6554	86	52.16	111	47.9158	142
2561	MYO_125990	CP003265	complement(2860361..2864191)	3831	hypothetical protein	similar to sll0821	AGF52828.1	1.0598	0.984522	66.7579	398	70.7499	502	65.7246	654
3389	MYO_41000	CP003267 (pSYSA_M)	96567..97583	1017	hypothetical protein	similar to slr7102	AGF53656.1	0.930264	0.984307	17.6917	28	16.4579	31	17.414	46
2664	MYO_127020	CP003265	complement(2977927..2978235)	309	hypothetical protein	similar to sll0101	AGF52931.1	0.540153	0.984307	29.114	14	15.726	9	28.6571	23
2852	MYO_128910	CP003265	complement(3199968..3201131)	1164	magnesium and cobalt transport protein	similar to sll0507	AGF53119.1	1.44041	0.984307	15.4574	28	22.265	48	15.2148	46
704	MYO_17130	CP003265	779594..780949	1356	hypothetical protein	similar to slr2030	AGF50971.1	1.30537	0.984307	26.5375	56	34.6413	87	26.1211	92
1388	MYO_114030	CP003265	1536297..1537280	984	hypothetical protein	similar to slr2079	AGF51655.1	1.24835	0.984307	45.7125	70	57.0654	104	44.9951	115
1806	MYO_118280	CP003265	1981616..1982401	786	hypothetical protein	similar to slr1690	AGF52073.1	1.20034	0.984307	11.4456	14	13.7386	20	11.266	23
1455	MYO_114710	CP003265	1613041..1614117	1077	transposase	similar to slr1522	AGF51722.1	0.720204	0.984307	8.35303	12	6.01589	11	8.22195	22
2733	MYO_127720	CP003265	complement(3062180..3062878)	699	OmpR subfamily	similar to sll0789	AGF53000.1	1.86053	0.984307	12.8701	13	23.9452	30	12.6682	23
1829	MYO_118510	CP003265	2011250..2011954	705	OmpR subfamily	similar to slr0947	AGF52096.1	1.14456	0.984015	400.136	439	457.98	598	393.739	721
1488	hemB	CP003265	complement(1640757..1641740)	984	porphobilinogen synthase	similar to sll1994	AGF51755.1	1.11884	0.983857	124.077	190	138.822	253	122.074	312
235	MYO_12380	CP003265	261863..262060	198	hypothetical protein	similar to ssr2998	AGF50502.1	0.809119	0.983779	262.876	81	212.698	78	258.612	133
2446	MYO_124830	CP003265	complement(2731298..2731591)	294	hypothetical protein	similar to ssl0353	AGF52713.1	1.5049	0.983668	146.44	67	220.378	120	144.048	110
2907	ndhG	CP003265	complement(3264963..3265559)	597	NADH dehydrogenase subunit 6	similar to sll0521	AGF53174.1	1.18839	0.983455	270.166	251	321.062	355	265.696	412
1733	hypB_2	CP003265	complement(1906233..1907090)	858	hydrogenase isoenzymes formation protein HypB	similar to sll1432	AGF52000.1	1.35625	0.983377	137.804	184	186.898	297	135.513	302
179	MYO_11810	CP003265	194859..195617	759	hypothetical protein	similar to slr1098	AGF50446.1	1.08284	0.983102	120.22	142	130.18	183	118.189	233
1269	pys	CP003265	1397768..1398781	1014	phytoene synthase	similar to slr1255	AGF51536.1	1.15839	0.983061	65.2726	103	75.611	142	64.167	169
1101	MYO_111140	CP003265	1225560..1226033	474	hypothetical protein	similar to slr1876	AGF51368.1	0.939368	0.982865	241.309	178	226.678	199	237.174	292
1842	MYO_118640	CP003265	2023018..2023449	432	hypothetical protein	similar to slr0954	AGF52109.1	0.913944	0.982806	169.572	114	154.979	124	166.656	187
684	MYO_16930	CP003265	755554..756696	1143	hypothetical protein	similar to slr2015	AGF50951.1	1.19375	0.982742	92.1997	164	110.064	233	90.6085	269
2102	glgB	CP003265	complement(2328772..2331084)	2313	1,4-alpha-glucan branching enzyme	similar to sll0158	AGF52369.1	0.957999	0.982686	73.3432	264	70.2628	301	72.0734	433
1675	MYO_116970	CP003265	complement(1835160..1836599)	1440	hypothetical protein	similar to sll1377	AGF51942.1	0.88057	0.982595	111.56	250	98.2366	262	109.619	410
2372	secA	CP003265	complement(2644654..2647452)	2799	preprotein translocase SecA subunit	similar to sll0616	AGF52639.1	1.09651	0.982595	91.8309	400	100.694	522	90.2326	656
2653	aroH	CP003265	complement(2963422..2963805)	384	chorismate mutase	similar to sll0109	AGF52920.1	1.07472	0.982317	143.913	86	154.666	110	141.368	141
2987	MYO_130350	CP003265	3369419..3369760	342	hypothetical protein	similar to slr1565	AGF53254.1	1.07364	0.98193	67.6407	36	72.6217	46	66.4184	59
2428	carB	CP003265	complement(2710639..2713956)	3318	carbamoyl-phosphate synthase, pyrimidine-specific, large chain	similar to sll0370	AGF52695.1	0.923079	0.981695	41.2511	213	38.078	234	40.496	349
2049	rpoD_3	CP003265	complement(2266393..2267430)	1038	RNA polymerase sigma factor	similar to sll0306	AGF52316.1	0.807288	0.981603	284.15	459	229.391	441	278.922	752
2551	MYO_125890	CP003265	2850879..2851754	876	hypothetical protein	similar to slr0841	AGF52818.1	0.893871	0.981576	68.9534	94	61.6354	100	67.683	154
2295	purU	CP003265	complement(2564505..2565359)	855	phosphoribosylglycinamide formyltransferase	similar to sll0070	AGF52562.1	0.893871	0.981576	35.3235	47	31.5746	50	34.6727	77
923	MYO_19340	CP003265	1018305..1018781	477	hypothetical protein	similar to slr1218	AGF51190.1	0.929626	0.981576	63.3157	47	58.8599	52	62.1491	77
1988	clpP_1	CP003265	2203041..2203718	678	ATP-dependent Clp protease proteolytic subunit	similar to slr0164	AGF52255.1	1.08987	0.981206	392.376	414	427.641	537	385.002	678
1268	pds	CP003265	1396289..1397707	1419	phytoene desaturase	similar to slr1254	AGF51535.1	1.164	0.981166	98.7202	218	114.91	302	96.8609	357
376	MYO_13820	CP003265	403654..404529	876	hypothetical protein	similar to slr0670	AGF50643.1	1.43464	0.98113	167.982	229	240.994	391	164.812	375
2860	clpP_3	CP003265	3209867..3210463	597	ATP-dependent protease ClpP	similar to slr0542	AGF53127.1	1.12757	0.980981	207.737	193	234.239	259	203.787	316
3082	MYO_131300	CP003265	complement(3482784..3486002)	3219	hypothetical protein	similar to sll0446	AGF53349.1	0.754728	0.980899	45.1148	226	34.0494	203	44.2531	370
1689	MYO_117110	CP003265	1856516..1857073	558	hypothetical protein	similar to slr1266	AGF51956.1	0.88607	0.980417	63.3374	55	56.1214	58	62.0971	90
1762	MYO_117840	CP003265	1935555..1935866	312	hypothetical protein	similar to slr1168	AGF52029.1	0.821142	0.980417	90.6212	44	74.4129	43	88.8466	72
3465	MYO_3240	CP003269 (pSYSX_M)	complement(23898..24110)	213	hypothetical protein	similar to ssl6023	AGF53732.1	0.687468	0.980417	33.1852	0	22.8138	0	32.5354	0
762	rps17	CP003265	complement(837396..837641)	246	30S ribosomal protein S17	similar to ssl3437	AGF51029.1	1.06716	0.979622	357.863	137	381.899	174	350.571	224
1273	MYO_112880	CP003265	1401669..1402424	756	hypothetical protein	similar to slr1258	AGF51540.1	0.986367	0.979469	97.748	115	96.4154	135	95.7412	188
1955	glnB	CP003265	complement(2149559..2149816)	258	nitrogen regulatory protein P-II	similar to ssl0707	AGF52222.1	1.2035	0.979415	1895.38	761	2281.08	1090	1856.36	1244
1189	opcA	CP003265	1314697..1316124	1428	OxPPCycle protein	similar to slr1734	AGF51456.1	1.23577	0.979088	184.496	410	227.994	603	180.638	670
3007	MYO_130550	CP003265	complement(3389569..3390720)	1152	hypothetical protein		AGF53274.1	1.06567	0.979088	22.8698	41	24.3717	52	22.3916	67
92	MYO_1920	CP003265	109222..110313	1092	hypothetical protein	similar to slr0723	AGF50359.1	1.12715	0.979088	24.1264	41	27.1941	55	23.6219	67
1823	MYO_118450	CP003265	2005293..2006276	984	aldehyde reductase	similar to slr0942	AGF52090.1	1.22466	0.978993	99.9144	153	122.361	223	97.8155	250
462	frpC	CP003265	complement(506354..508129)	1776	iron-regulated protein	similar to sll1009	AGF50729.1	1.19815	0.978674	395.828	1094	474.259	1560	387.386	1787
1410	MYO_114260	CP003265	1560162..1560587	426	transposase	similar to slr2095	AGF51677.1	1.12032	0.978601	45.2526	29	50.6973	39	44.2842	48
2489	MYO_125265	CP003265	2788342..2788794	453	putative endonuclease	similar to slr0915	AGF52756.1	1.06065	0.978433	29244.1	20616	31017.7	26024	28613.4	33667
209	chlD	CP003265	232008..234038	2031	Mg chelatase subunit ChlD	similar to slr1777	AGF50476.1	0.985994	0.978194	31.0062	98	30.5719	115	30.33	160
2538	MYO_125760	CP003265	complement(2835063..2836178)	1116	OppC in a binding protein-dependent transport system	similar to sll0833	AGF52805.1	0.908829	0.978194	28.2139	49	25.6417	53	27.5987	80
2061	MYO_120890	CP003265	complement(2282058..2282690)	633	hypothetical protein	similar to sll0298	AGF52328.1	1.13062	0.978014	138.06	136	156.092	183	135.024	222
83	pnp	CP003265	complement(96325..98481)	2157	polyribonucleotide nucleotidyltransferase	similar to sll1043	AGF50350.1	0.973683	0.977792	271.99	913	264.832	1058	265.949	1490
892	MYO_19020	CP003265	982884..983195	312	hypothetical protein	similar to slr1544	AGF51159.1	0.899203	0.97755	117.396	57	105.562	61	114.76	93
3346	MYO_4570	CP003267 (pSYSA_M)	46391..47035	645	hypothetical protein	similar to slr7059	AGF53613.1	0.840239	0.97755	56.7867	57	47.7144	57	55.5119	93
2641	MYO_126790	CP003265	complement(2949829..2951523)	1695	hypothetical protein	similar to sll0590	AGF52908.1	1.01713	0.97755	7.20304	19	7.32643	23	7.04133	31
202	MYO_12040	CP003265	223673..224806	1134	hypothetical protein	similar to slr1772	AGF50469.1	0.9955	0.976864	52.1323	92	51.8977	109	50.9262	150
1960	MYO_119860	CP003265	complement(2153765..2154229)	465	hypothetical protein	similar to sll0354	AGF52227.1	0.995838	0.976382	37.3115	27	37.1562	32	36.4303	44
723	ziaA	CP003265	complement(803121..806039)	2919	Zinc exporter	similar to sll1076	AGF50990.1	0.964718	0.976382	11.8875	54	11.4681	62	11.6068	88
3265	MYO_21060	CP003266 (pSYSM_M)	98614..99219	606	plasmid partitioning protein	similar to slr5105	AGF53532.1	0.933598	0.976382	28.6301	15	26.729	20	27.9539	29
2296	icfA_2	CP003265	2565450..2566241	792	carbonic anhydrase	similar to slr0051	AGF52563.1	1.16433	0.975748	113.589	140	132.255	194	110.834	228
1918	MYO_119430	CP003265	complement(2107965..2108372)	408	hypothetical protein	similar to sll0268	AGF52185.1	1.04541	0.97535	135.447	86	141.598	107	132.108	140
3036	accA	CP003265	complement(3421629..3422609)	981	acetyl-CoA carboxylase alpha subunit	similar to sll0728	AGF53303.1	0.983258	0.975202	61.573	94	60.5422	110	60.0461	153
1243	MYO_112570	CP003265	1373821..1377015	3195	hypothetical protein	similar to slr1243	AGF51510.1	1.4663	0.975077	10.2573	51	15.0402	89	10.0016	83
357	MYO_13630	CP003265	384343..384975	633	hypothetical protein	similar to slr1081	AGF50624.1	1.00499	0.975077	51.7724	51	52.0308	61	50.4821	83
512	MYO_15190	CP003265	complement(566485..568407)	1923	hypothetical protein	similar to sll1945	AGF50779.1	0.978934	0.974614	348.193	1042	340.858	1214	339.354	1695
2672	MYO_127110	CP003265	complement(2987793..2989166)	1374	sensory transduction histidine kinase	similar to sll0094	AGF52939.1	0.931349	0.974511	38.8171	83	36.1523	92	37.8277	135
3301	MYO_4120	CP003267 (pSYSA_M)	8531..11458	2928	hypothetical protein	similar to slr7011	AGF53568.1	1.30591	0.974511	18.2154	83	23.7877	129	17.7511	135
2212	mltA	CP003265	complement(2470912..2472063)	1152	membrane-bound lytic transglycosylase A	similar to sll0016	AGF52479.1	1.03414	0.974431	50.7599	91	52.4928	112	49.462	148
2214	MYO_122470	CP003265	2473287..2474048	762	hypothetical protein	similar to slr0007	AGF52481.1	0.968774	0.974245	297.681	353	288.386	407	290.014	574
3333	MYO_4440	CP003267 (pSYSA_M)	complement(37846..38115)	270	hypothetical protein	similar to ssl7046	AGF53600.1	1.99557	0.973608	19.0396	8	37.9948	19	18.5371	13
530	MYO_15370	CP003265	581740..581979	240	hypothetical protein	similar to ssr3465	AGF50797.1	1.0503	0.973608	128.517	48	134.982	60	125.126	78
494	fbp_1	CP003265	complement(548631..549203)	573	ferripyochelin binding protein	similar to sll1636	AGF50761.1	0.892753	0.973608	35.8862	32	32.0375	34	34.9391	52
783	MYO_17920	CP003265	851686..852102	417	transposase	similar to slr1903	AGF51050.1	0.840239	0.973608	49.3112	27	41.4332	30	48.0098	48
2492	MYO_125290	CP003265	2791194..2791649	456	hypothetical protein	similar to slr0919	AGF52759.1	1.44941	0.973608	56.3673	40	81.6994	69	54.8796	65
2654	MYO_126920	CP003265	2964003..2965199	1197	hypothetical protein	similar to slr0626	AGF52921.1	0.971526	0.973608	17.1786	32	16.6894	37	16.7252	52
13	fecD	CP003265	14626..15675	1050	iron(III) dicitrate transport system permease protein FecD	similar to slr1317	AGF50280.1	1.0503	0.973608	9.7918	16	10.2843	20	9.53338	26
870	MYO_18800	CP003265	956328..957443	1116	hypothetical protein	similar to slr1840	AGF51137.1	0.82711	0.973608	36.8509	64	30.4797	63	35.8783	104
64	hofD	CP003265	74995..75804	810	type 4 prepilin peptidase	similar to slr1120	AGF50331.1	0.988121	0.973009	99.1646	125	97.9866	147	96.4881	203
1184	MYO_111970	CP003265	1310298..1310747	450	hypothetical protein	similar to slr1732	AGF51451.1	1.0119	0.972803	132.801	93	134.382	112	129.189	151
3489	MYO_3480	CP003269 (pSYSX_M)	43696..47151	3456	hypothetical protein	similar to slr6047	AGF53756.1	0.917799	0.972456	24.1714	130	22.1845	142	23.5056	211
2922	recR	CP003265	3280735..3281433	699	recombination protein	similar to slr1426	AGF53189.1	1.24562	0.972294	104.8	114	130.54	169	101.896	185
1089	MYO_111020	CP003265	complement(1213923..1214621)	699	hypothetical protein	similar to sll1773	AGF51356.1	1.26969	0.971944	41.3682	45	52.525	68	40.2076	73
1348	MYO_113630	CP003265	complement(1490103..1491155)	1053	sensory transduction histidine kinase	similar to sll1590	AGF51615.1	0.896254	0.971944	27.461	45	24.612	48	26.6905	73
425	MYO_14320	CP003265	466029..466595	567	hypothetical protein	similar to slr1599	AGF50692.1	0.885657	0.971584	83.8649	74	74.2756	78	81.4818	120
2513	MYO_125510	CP003265	complement(2810182..2810904)	723	hypothetical protein	similar to sll0545	AGF52780.1	0.772111	0.971584	32.8848	37	25.3907	34	31.9504	60
2002	MYO_120280	CP003265	2218314..2218898	585	hypothetical protein	similar to slr1928	AGF52269.1	1.30522	0.971427	113.139	103	147.672	160	109.906	167
917	repA	CP003265	complement(1012271..1012543)	273	rare lipoprotein A	similar to ssl3177	AGF51184.1	0.8657	0.971339	155.351	66	134.487	68	150.898	107
1888	pgsA	CP003265	complement(2073236..2073775)	540	CDP-diacylglycerol--glycerol-3-phosphate 3-phosphatidyltransferase	similar to sll1522	AGF52155.1	0.753317	0.971026	34.5093	29	25.9964	26	33.5094	47
721	MYO_17300	CP003265	801298..801807	510	hypothetical protein	similar to slr1142	AGF50988.1	1.27484	0.971026	36.5392	29	46.5819	44	35.4806	47
1742	tufA	CP003265	complement(1913743..1914942)	1200	protein synthesis elongation factor Tu	similar to sll1099	AGF52009.1	1.18636	0.970173	583.683	1090	692.455	1539	566.273	1765
3075	MYO_131230	CP003265	complement(3474223..3475125)	903	hypothetical protein	similar to sll1542	AGF53342.1	1.08031	0.970042	14.9439	21	16.144	27	14.4962	34
2357	MYO_123930	CP003265	complement(2629392..2630777)	1386	Na/H+ antiporter	similar to sll0689	AGF52624.1	1.0603	0.970042	38.9447	84	41.2931	106	37.7779	136
677	MYO_16860	CP003265	750535..750927	393	hypothetical protein	similar to slr2010	AGF50944.1	0.960273	0.970042	34.3367	21	32.9726	24	33.308	34
2147	secF	CP003265	2399662..2400609	948	protein-export membrane protein SecF	similar to slr0775	AGF52414.1	0.820233	0.970042	28.469	42	23.3512	41	27.6162	68
2971	MYO_130180	CP003265	3345459..3345821	363	hypothetical protein	similar to slr0664	AGF53238.1	0.760216	0.970042	37.1744	21	28.2606	19	36.0608	34
2535	alr	CP003265	2829149..2830351	1203	alanine racemase	similar to slr0827	AGF52802.1	1.12609	0.969748	155.439	291	175.038	390	150.736	471
2591	dnaJ_3	CP003265	2898248..2899246	999	DnaJ protein	similar to slr0093	AGF52858.1	0.901347	0.969523	35.3777	55	31.8875	59	34.2995	89
1051	psbH	CP003265	complement(1166708..1166902)	195	photosystem II PsbH protein	similar to ssl2598	AGF51318.1	0.958676	0.968828	1239.04	376	1187.84	429	1200.42	608
750	rpl36	CP003265	complement(830756..830872)	117	50S ribosomal protein L36	similar to sml0006	AGF51017.1	1.10631	0.968615	659.063	120	729.131	158	638.379	194
975	MYO_19860	CP003265	complement(1076129..1076674)	546	hypothetical protein	similar to sll1355	AGF51242.1	0.88225	0.968615	70.6139	60	62.2992	63	68.3977	97
475	MYO_14820	CP003265	524448..529097	4650	hypothetical protein	similar to slr1753	AGF50742.1	0.94132	0.96854	18.3794	133	17.3009	149	17.8012	215
2117	MYO_121450	CP003265	2363199..2366450	3252	cation or drug efflux system protein	similar to slr0369	AGF52384.1	1.02241	0.968527	133.971	678	136.974	825	129.755	1096
1668	suhB_2	CP003265	complement(1829097..1829960)	864	extragenic suppressor SuhB	similar to sll1383	AGF51935.1	0.920809	0.968479	54.2926	73	49.9932	80	52.5813	118
1943	pgk	CP003265	2136539..2137663	1125	phosphoglycerate kinase	similar to slr0394	AGF52210.1	1.16683	0.968227	484.939	849	565.843	1179	469.531	1372
129	MYO_11290	CP003265	145761..146615	855	hypothetical protein	similar to slr0244	AGF50396.1	1.2218	0.968181	311.147	414	380.159	602	301.247	669
1393	ctaE_2	CP003265	1540810..1541406	597	cytochrome c oxidase subunit III	similar to slr2083	AGF51660.1	1.37885	0.967847	41.978	39	57.8815	64	40.6283	63
2846	slt	CP003265	3191267..3191419	153	soluble lytic transglycosylase	similar to slr0534	AGF53113.1	1.09877	0.967847	54.5989	13	59.9918	17	52.8434	21
1210	rimI	CP003265	1337625..1338101	477	ribosomal-protein-alanine acetyltransferase	similar to slr0853	AGF51477.1	0.775605	0.967847	17.5128	13	13.583	12	16.9498	21
3112	MYO_131600	CP003265	3521029..3521541	513	hypothetical protein	similar to slr1182	AGF53379.1	0.710971	0.967847	16.2839	13	11.5774	11	15.7603	21
1866	MYO_118880	CP003265	complement(2045964..2046599)	636	hypothetical protein	similar to sll1532	AGF52133.1	0.984023	0.967601	188.937	187	185.918	219	182.815	302
2608	MYO_126460	CP003265	complement(2914804..2916042)	1239	hypothetical protein	similar to sll0480	AGF52875.1	0.816094	0.967582	90.2422	174	73.6461	169	87.3168	281
234	talB	CP003265	260463..261638	1176	transaldolase	similar to slr1793	AGF50501.1	1.15671	0.967376	374.296	685	432.951	943	362.085	1106
2292	MYO_123270	CP003265	2561733..2562713	981	hypothetical protein	similar to slr0050	AGF52559.1	0.945268	0.967367	62.8831	96	59.4414	108	60.8311	155
1483	MYO_115000	CP003265	1635945..1636739	795	hypothetical protein	similar to slr2125	AGF51750.1	0.892753	0.967367	77.5954	96	69.2735	102	75.0632	155
1428	MYO_114440	CP003265	complement(1583082..1583552)	471	hypothetical protein	similar to sll1426	AGF51695.1	0.963928	0.967145	268.768	197	259.073	226	259.937	318
1596	MYO_116150	CP003265	complement(1751360..1752970)	1611	hypothetical protein	similar to sll1242	AGF51863.1	0.809545	0.967111	174.707	438	141.433	422	168.961	707
1178	rpoD_2	CP003265	complement(1300141..1301250)	1110	RNA polymerase sigma factor	similar to sll1689	AGF51445.1	0.851294	0.967039	131.991	228	112.363	231	127.64	368
3145	MYO_131930	CP003265	complement(3552202..3553185)	984	hypothetical protein	similar to sll0564	AGF53412.1	1.15717	0.967039	74.446	114	86.1468	157	71.9922	184
372	hagH1	CP003265	complement(398543..399316)	774	glyoxalase II	similar to sll1019	AGF50639.1	1.06939	0.9668	36.5295	44	39.0644	56	35.3167	71
2961	prlC	CP003265	3333675..3335816	2142	oligopeptidase A	similar to slr0659	AGF53228.1	0.944784	0.966361	65.0987	217	61.5042	244	62.9088	350
389	lim	CP003265	complement(423592..424668)	1077	lipophilic protein	similar to sll0648	AGF50656.1	0.875742	0.966224	84.7236	142	74.196	148	81.862	229
758	rps8	CP003265	complement(835514..835915)	402	30S ribosomal protein S8	similar to sll1809	AGF51025.1	0.955735	0.96563	465.156	291	444.566	331	449.169	469
2278	ccmK_4	CP003265	2548021..2548914	894	carbon dioxide concentrating mechanism protein CcmK	similar to slr0436	AGF52545.1	0.962603	0.96561	74.034	103	71.2654	118	71.488	166
1589	pgi	CP003265	1742967..1744562	1596	glucose-6-phosphate isomerase	similar to slr1349	AGF51856.1	0.879421	0.965459	77.7063	193	68.3365	202	75.0223	311
300	cbiH	CP003265	331144..333027	1884	precorrin methylase	similar to slr0969	AGF50567.1	1.27203	0.965287	24.5575	72	31.2378	109	23.705	116
488	MYO_14950	CP003265	544531..544755	225	hypothetical protein	similar to ssr2962	AGF50755.1	1.21368	0.965287	51.4069	18	62.3915	26	49.6224	29
139	MYO_11400	CP003265	154703..155461	759	ABC transporter	similar to slr0251	AGF50406.1	0.95227	0.965287	76.1961	90	72.5593	102	73.5511	145
2184	MYO_122130	CP003265	complement(2435189..2436082)	894	hypothetical protein	similar to sll0319	AGF52451.1	0.941378	0.965287	155.256	216	146.155	242	149.866	348
1746	MYO_117680	CP003265	complement(1918382..1919017)	636	hypothetical protein	similar to sll1095	AGF52013.1	0.653519	0.965287	18.1864	18	11.8852	14	17.5551	29
2507	MYO_125450	CP003265	2803350..2804327	978	hypothetical protein	similar to slr0565	AGF52774.1	0.90304	0.965115	254.932	388	230.214	417	246.039	625
952	todF	CP003265	complement(1049172..1050062)	891	2-hydroxy-6-oxohepta-2,4-dienoate hydrolase	similar to sll1129	AGF51219.1	1.05386	0.964723	42.5506	59	44.8424	74	41.0496	95
3517	MYO_3760	CP003269 (pSYSX_M)	72816..75218	2403	hypothetical protein	similar to slr6075	AGF53784.1	1.14764	0.964475	10.9638	0	12.5825	0	10.5743	0
2236	guaA	CP003265	2501682..2503310	1629	GMP synthetase	similar to slr0213	AGF52503.1	1.00324	0.964195	144.375	366	144.842	437	139.206	589
1917	MYO_119420	CP003265	complement(2107434..2107847)	414	hypothetical protein	similar to sll0269	AGF52184.1	1.05943	0.96384	35.6993	23	37.8209	29	34.4084	37
91	MYO_1910	CP003265	108290..109201	912	hypothetical protein	similar to slr0722	AGF50358.1	1.79007	0.96384	16.2056	23	29.0092	49	15.6196	37
702	MYO_17110	CP003265	complement(776052..776438)	387	hypothetical protein	similar to sll1911	AGF50969.1	1.27862	0.96384	38.1899	23	48.8305	35	36.8089	37
3490	MYO_3490	CP003269 (pSYSX_M)	47182..47409	228	hypothetical protein	similar to ssr6048	AGF53757.1	0.657578	0.96384	64.8224	23	42.6258	18	62.4783	37
1665	MYO_116850	CP003265	1826222..1827376	1155	inner membrane protein	similar to slr1471	AGF51932.1	1.09305	0.963667	251.471	452	274.872	588	242.334	727
1359	MYO_113740	CP003265	complement(1506951..1508237)	1287	hypothetical protein	similar to sll0252	AGF51626.1	0.85199	0.963657	71.3985	143	60.8308	145	68.8037	230
773	ycf21	CP003265	complement(843268..843687)	420	Ycf21	similar to sll1797	AGF51040.1	1.22741	0.963329	156.057	102	191.545	149	150.334	164
2893	asd	CP003265	3245753..3246595	843	aspartate beta-semialdehyde dehydrogenese	similar to slr0549	AGF53160.1	0.980278	0.963329	233.252	306	228.652	357	224.699	492
1972	petF_3	CP003265	2177845..2178156	312	ferredoxin	similar to slr0150	AGF52239.1	1.23909	0.96318	325.413	158	403.214	233	313.431	254
3147	MYO_131950	CP003265	3553572..3555179	1608	eukaryotic protein kinase	similar to slr0599	AGF53414.1	1.17633	0.962909	55.9466	140	65.8119	196	53.8715	225
881	MYO_18910	CP003265	complement(971115..971972)	858	hypothetical protein	similar to sll1469	AGF51148.1	0.750213	0.962909	20.9702	28	15.7321	25	20.1924	45
3230	MYO_2710	CP003266 (pSYSM_M)	complement(71192..71446)	255	hypothetical protein	similar to ssl5070	AGF53497.1	0.990281	0.962909	70.5586	28	69.8728	33	67.9415	45
1305	MYO_113200	CP003265	complement(1437956..1439410)	1455	44.5 kD bacteriochlorophyll synthase subunit	similar to sll1906	AGF51572.1	0.875993	0.962454	41.5142	94	36.3662	98	39.9555	151
477	MYO_14840	CP003265	complement(530219..530737)	519	hypothetical protein	similar to sll1647	AGF50744.1	1.27309	0.962261	40.8581	33	52.016	50	39.3162	53
1681	MYO_117030	CP003265	complement(1843037..1843735)	699	catabolite gene activator protein	similar to sll1371	AGF51948.1	0.993009	0.962261	30.3367	33	30.1246	39	29.1918	53
2434	MYO_124710	CP003265	complement(2717997..2719502)	1506	hypothetical protein	similar to sll0188	AGF52701.1	0.831808	0.961836	127.579	299	106.121	296	122.71	480
185	MYO_11870	CP003265	202554..204395	1842	hypothetical protein	similar to slr1104	AGF50452.1	1.05727	0.961725	94.5391	271	99.9538	341	90.9206	435
405	thiE	CP003265	complement(444015..445046)	1032	thiamin biosynthetic bifunctional enzyme	similar to sll0635	AGF50672.1	0.664375	0.961416	26.7744	43	17.7883	34	25.7414	69
3045	MYO_130930	CP003265	complement(3432620..3437935)	5316	hypothetical protein	similar to sll0723	AGF53312.1	1.17875	0.961216	16.802	139	19.8054	195	16.1504	223
588	MYO_15970	CP003265	645631..657549	11919	integrin alpha-subunit domain-like protein	similar to slr1028	AGF50855.1	0.884573	0.960436	21.4573	398	18.9805	419	20.6084	638
2244	rfbA_1	CP003265	complement(2509734..2510915)	1182	glucose-1-phosphate thymidylyltransferase	similar to sll0207	AGF52511.1	1.18622	0.960392	36.9678	68	43.8519	96	35.5035	109
1873	MYO_118960	CP003265	complement(2051750..2054740)	2991	hypothetical protein	similar to sll1528	AGF52140.1	1.00087	0.960392	14.6091	68	14.6219	81	14.0305	109
1413	MYO_114290	CP003265	1561584..1565369	3786	hybrid sensory kinase	similar to slr2098	AGF51680.1	0.969238	0.959624	40.9042	241	39.6459	278	39.2527	386
2342	MYO_123780	CP003265	2615335..2617362	2028	sensory transduction histidine kinase	similar to slr0484	AGF52609.1	0.913303	0.959498	87.4526	276	79.8707	300	83.9106	442
585	MYO_15930	CP003265	642646..642984	339	hypothetical protein	similar to slr1025	AGF50852.1	1.59645	0.95863	18.9554	10	30.2613	19	18.1712	16
545	dnaJ_2	CP003265	complement(599412..600335)	924	DnaJ protein	similar to sll1933	AGF50812.1	0.907458	0.95863	17.386	25	15.7771	27	16.6667	40
469	MYO_14760	CP003265	complement(520784..520942)	159	hypothetical protein	similar to ssl1923	AGF50736.1	0.672191	0.95863	20.2071	5	13.583	4	19.3712	8
3277	MYO_21180	CP003266 (pSYSM_M)	107531..107746	216	hypothetical protein	similar to ssr5117	AGF53544.1	0.672191	0.95863	14.8747	5	9.99863	4	14.2593	8
3520	MYO_3790	CP003269 (pSYSX_M)	76556..76753	198	hypothetical protein	similar to ssr6078	AGF53787.1	0.672191	0.95863	32.4539	0	21.8152	0	31.1113	0
968	MYO_19790	CP003265	1065053..1065277	225	hypothetical protein	similar to ssr2406	AGF51235.1	0.638581	0.95863	71.3985	25	45.5938	19	68.4448	40
1383	MYO_113980	CP003265	complement(1530770..1531426)	657	ABC transporter	similar to sll0240	AGF51650.1	1.73649	0.95863	14.6709	15	25.476	31	14.064	24
1045	MYO_110580	CP003265	complement(1161096..1161497)	402	hypothetical protein	similar to sll0863	AGF51312.1	1.34438	0.95863	7.99237	5	10.7448	8	7.66173	8
2081	MYO_121090	CP003265	complement(2303174..2303677)	504	hypothetical protein	similar to sll0176	AGF52348.1	1.26036	0.95863	12.7497	10	16.0692	15	12.2223	16
3300	MYO_4110	CP003267 (pSYSA_M)	6349..8517	2169	hypothetical protein	similar to slr7010	AGF53567.1	1.24835	0.95863	10.3691	35	12.9443	52	9.94011	56
304	rps15	CP003265	complement(336313..336582)	270	30S ribosomal protein S15	similar to ssl1784	AGF50571.1	1.06845	0.95789	385.552	162	411.944	206	369.316	259
626	rnb	CP003265	complement(692713..694713)	2001	ribonuclease II	similar to sll1290	AGF50893.1	0.911245	0.957786	45.6009	142	41.5535	154	43.6759	227
2454	gltX	CP003265	complement(2738942..2740393)	1452	glutamyl-tRNA synthetase	similar to sll0179	AGF52721.1	0.715978	0.957786	62.8425	142	44.9938	121	60.1897	227
482	MYO_14890	CP003265	complement(538790..539356)	567	hypothetical protein	similar to sll1643	AGF50749.1	1.17777	0.957605	132.597	117	156.169	164	126.976	187
391	cyaA_1	CP003265	complement(425570..427840)	2271	adenylate cyclase	similar to sll0646	AGF50658.1	0.980278	0.957455	28.8612	102	28.292	119	27.6333	163
2422	rlpA	CP003265	2704001..2704966	966	rare lipoprotein A	similar to slr0423	AGF52689.1	0.876771	0.957327	122.397	184	107.315	192	117.174	294
3442	MYO_310	CP003269 (pSYSX_M)	join(105009..106004,1..255)	1251	hypothetical protein	similar to slr6110	AGF53709.1	1.17838	0.957168	84.24	164	99.267	230	80.6319	262
1357	cobA	CP003265	1505950..1506561	612	cob(I)alamin adenosyltransferase	similar to slr0260	AGF51624.1	1.03863	0.956965	75.5984	72	78.5187	89	72.3451	115
627	MYO_16360	CP003265	complement(694792..695376)	585	hypothetical protein	similar to sll1289	AGF50894.1	0.802616	0.956841	73.5954	67	59.0688	64	70.4191	107
3530	MYO_3890	CP003269 (pSYSX_M)	81463..81960	498	hypothetical protein	similar to slr6088	AGF53797.1	0.969506	0.956325	67.0974	0	65.0513	0	64.167	0
1332	MYO_113470	CP003265	1472443..1473921	1479	hypothetical protein	similar to slr1721	AGF51599.1	0.816001	0.956325	45.1853	104	36.8712	101	43.2118	166
1433	MYO_114490	CP003265	complement(1588603..1588851)	249	hypothetical protein	similar to ssl2781	AGF51700.1	1.28036	0.955777	108.388	42	138.776	64	103.595	67
1636	MYO_116550	CP003265	1798077..1798952	876	hypothetical protein	similar to slr1978	AGF51903.1	1.0603	0.955777	30.809	42	32.6668	53	29.4465	67
3047	MYO_130950	CP003265	complement(3439605..3443477)	3873	leukotoxin LtA	similar to sll0721	AGF53314.1	0.920261	0.955777	6.96841	42	6.41276	46	6.66024	67
3472	MYO_3310	CP003269 (pSYSX_M)	27578..27796	219	hypothetical protein	similar to ssr6030	AGF53739.1	0.999203	0.955391	108.565	32	108.478	37	103.722	57
1782	rpl27	CP003265	1956709..1956972	264	50S ribosomal protein L27	similar to ssr2799	AGF52049.1	1.01137	0.955229	1457.99	599	1474.57	721	1392.71	955
1274	MYO_112890	CP003265	1402555..1403253	699	hypothetical protein	similar to slr1259	AGF51541.1	1.0229	0.954822	549.738	598	562.327	728	524.902	953
1973	MYO_119990	CP003265	2178281..2179243	963	hypothetical protein	similar to slr0151	AGF52240.1	1.21217	0.954371	413.044	619	500.679	893	394.197	986
1725	MYO_117470	CP003265	1896039..1896881	843	hypothetical protein	similar to slr1530	AGF51992.1	0.840239	0.954192	20.5811	27	17.293	27	19.6383	43
500	MYO_15070	CP003265	553791..554048	258	hypothetical protein	similar to ssr3122	AGF50767.1	0.972908	0.9539	189.289	76	184.161	88	180.563	121
1857	MYO_118790	CP003265	2037547..2037999	453	hypothetical protein	similar to slr1626	AGF52124.1	1.18319	0.953739	69.5072	49	82.2404	69	66.2917	78
503	hisD_2	CP003265	555144..556448	1305	histidinol dehydrogenase	similar to slr1848	AGF50770.1	0.894867	0.953436	159.046	323	142.325	344	151.641	514
2263	MYO_122980	CP003265	2534091..2534747	657	hypothetical protein	similar to slr0232	AGF52530.1	1.08849	0.953183	43.0347	44	46.8429	57	41.02	70
499	MYO_15060	CP003265	complement(552799..553521)	723	hypothetical protein	similar to sll1752	AGF50766.1	0.756215	0.953183	97.7656	110	73.9318	99	93.1885	175
1226	lmbP	CP003265	1352564..1353544	981	LmbP protein	similar to slr0862	AGF51493.1	1.29855	0.953183	14.4107	22	18.713	34	13.736	35
867	pdhB	CP003265	complement(954108..955082)	975	pyruvate dehydrogenase E1 beta subunit	similar to sll1721	AGF51134.1	1.05242	0.953183	130.495	198	137.335	248	124.385	315
991	MYO_110040	CP003265	complement(1095427..1096338)	912	hypothetical protein	similar to sll1280	AGF51258.1	1.00065	0.953183	77.505	110	77.5552	131	73.8764	175
953	MYO_19640	CP003265	1050145..1050384	240	hypothetical protein	similar to ssr2060	AGF51220.1	0.840239	0.953183	58.9038	22	49.4932	22	56.1461	35
1035	MYO_110480	CP003265	complement(1150794..1152086)	1293	hypothetical protein	similar to sll0867	AGF51302.1	0.827006	0.952968	63.1156	127	52.197	125	60.1472	202
2909	ndhA	CP003265	complement(3266346..3267464)	1119	NADH dehydrogenase subunit 1	similar to sll0519	AGF53176.1	1.10213	0.952627	309.521	539	341.133	707	294.858	857
710	ctaC_1	CP003265	790374..791372	999	cytochrome c oxidase subunit II	similar to slr1136	AGF50977.1	1.1848	0.952595	178.818	278	211.863	392	170.341	442
698	MYO_17070	CP003265	772012..773406	1395	hypothetical protein	similar to slr2027	AGF50965.1	1.16341	0.952485	17.9648	39	20.9004	54	17.1112	61
967	ileS	CP003265	complement(1061893..1064859)	2967	isoleucyl-tRNA synthetase	similar to sll1362	AGF51234.1	0.859666	0.952396	37.468	173	32.21	177	35.6844	275
1223	MYO_112370	CP003265	complement(1350104..1350709)	606	hypothetical protein	similar to sll0847	AGF51490.1	0.894551	0.952251	278.878	263	249.471	280	265.562	418
2676	MYO_127150	CP003265	2991453..2992985	1533	hypothetical protein	similar to slr0114	AGF52943.1	1.18534	0.95221	23.4735	56	27.824	79	22.3517	89
2151	radC	CP003265	complement(2402678..2403409)	732	RadC protein	similar to sll0766	AGF52418.1	0.825234	0.95221	49.1596	56	40.5682	55	46.8103	89
1860	MYO_118820	CP003265	2040063..2040467	405	hypothetical protein	similar to slr1628	AGF52127.1	0.963803	0.951581	53.9456	34	51.9929	39	51.3336	54
946	MYO_19570	CP003265	complement(1044172..1044348)	177	glycoprotein 64	similar to ssl2250	AGF51213.1	0.840239	0.951581	61.7174	17	51.8573	17	58.7291	27
1859	moeB	CP003265	complement(2038749..2039927)	1179	molybdopterin biosynthesis MoeB protein	similar to sll1536	AGF52126.1	0.729062	0.951312	214.196	393	156.162	341	203.767	624
80	rne	CP003265	93128..95152	2025	ribonuclease E	similar to slr1129	AGF50347.1	1.20823	0.951195	173.895	548	210.105	788	165.408	870
853	MYO_18630	CP003265	complement(933979..934362)	384	hypothetical protein	similar to sll1736	AGF51120.1	1.09231	0.95114	133.872	80	146.23	104	127.331	127
1354	MYO_113690	CP003265	complement(1497768..1503017)	5250	hypothetical protein	similar to sll1586	AGF51621.1	1.01362	0.951021	38.5552	315	39.0804	380	36.6668	500
3027	chlL	CP003265	3412080..3413015	936	light-independent protochlorophyllide reductase iron protein subunit ChlL	similar to slr0749	AGF53294.1	1.08031	0.951021	259.506	378	280.346	486	246.796	600
941	frdA	CP003265	1040186..1041913	1728	succinate dehydrogenase flavoprotein subunit	similar to slr1233	AGF51208.1	1.22911	0.950707	44.996	121	55.3049	177	42.778	192
359	MYO_13650	CP003265	385467..386012	546	hypothetical protein	similar to slr1083	AGF50626.1	0.840239	0.950366	34.1301	29	28.6774	29	32.436	46
1609	MYO_116280	CP003265	1765739..1766692	954	hypothetical protein	similar to slr1963	AGF51876.1	0.989895	0.950144	313.884	466	310.712	549	298.235	739
1677	MYO_116990	CP003265	complement(1837728..1838960)	1233	hypothetical protein	similar to sll1376	AGF51944.1	0.931075	0.949993	57.8484	111	53.8613	123	54.9556	176
1760	MYO_117820	CP003265	complement(1932776..1933855)	1080	43 kD bacteriochlorophyll synthase subunit	similar to sll1091	AGF52027.1	0.924605	0.949826	728.86	1225	673.908	1348	692.29	1942
642	spoIID	CP003265	complement(711110..712285)	1176	sporulation protein SpoIID	similar to sll1283	AGF50909.1	1.14146	0.949586	57.9202	106	66.1134	144	55.0002	168
2362	pstB_2	CP003265	complement(2634096..2634896)	801	phosphate transport ATP-binding protein PstB	similar to sll0684	AGF52629.1	0.998774	0.949586	42.5182	53	42.4661	63	40.3747	84
2880	glmU	CP003265	complement(3231085..3232455)	1371	UDP-N-acetylglucosamine pyrophosphorylase	similar to sll0899	AGF53147.1	0.670303	0.949205	41.7142	89	27.9612	71	39.5954	141
647	gumB	CP003265	complement(719235..720749)	1515	GumB protein	similar to sll1581	AGF50914.1	0.888252	0.949119	133.607	315	118.677	333	126.809	499
2286	aspC_2	CP003265	complement(2556088..2557257)	1170	aspartate aminotransferase	similar to sll0402	AGF52553.1	0.937376	0.948933	95.015	173	89.0647	193	90.1628	274
1880	MYO_119030	CP003265	complement(2066123..2066962)	840	hypothetical protein	similar to sll1524	AGF52147.1	0.848991	0.948644	73.4385	96	62.3486	97	69.667	152
3441	MYO_5490	CP003268 (pSYSG_M)	complement(42203..42913)	711	hypothetical protein	similar to sll8048	AGF53708.1	1.61046	0.948644	21.6907	24	34.9319	46	20.5767	38
3233	MYO_2740	CP003266 (pSYSM_M)	72425..73159	735	hypothetical protein	similar to slr5073	AGF53500.1	1.26036	0.948644	10.4912	12	13.2227	18	9.95243	19
753	secY	CP003265	complement(832046..833374)	1329	preprotein translocase SecY subunit	similar to sll1814	AGF51020.1	0.96412	0.948644	377.139	780	363.607	895	357.771	1235
801	MYO_18100	CP003265	879063..879698	636	rehydrin	similar to slr1198	AGF51068.1	0.95534	0.948333	811.316	803	775.083	913	769.398	1271
163	atp1	CP003265	complement(177592..178038)	447	ATP synthase protein I	similar to sll1321	AGF50430.1	1.07569	0.948273	2129.02	1481	2290.16	1896	2018.89	2344
2161	MYO_121900	CP003265	2412101..2412586	486	hypothetical protein	similar to slr0780	AGF52428.1	1.23059	0.948251	167.919	127	206.638	186	159.229	201
1221	psbD	CP003265	complement(1347310..1348368)	1059	photosystem II D2 protein	similar to sll0849	AGF51488.1	1.04482	0.948069	4323.96	7047	4517.74	8816	4099.41	11222
2225	murZ	CP003265	2483874..2485190	1317	UDP-N-acetylglucosamine 1-carboxyvinyltransferase	similar to slr0017	AGF52492.1	1.06009	0.947749	408.387	837	432.925	1056	387.048	1324
2810	tar	CP003265	complement(3145706..3146197)	492	methyl-accepting chemotaxis protein II	similar to sll0042	AGF53077.1	1.35966	0.947736	71.8339	55	97.6696	89	68.0796	87
2955	rpoDI	CP003265	3320543..3321820	1278	RNA polymerase sigma factor	similar to slr0653	AGF53222.1	0.940193	0.947716	270.51	538	254.331	602	256.367	851
2871	argF	CP003265	complement(3223609..3224535)	927	ornithine carbamoyltransferase chain f	similar to sll0902	AGF53138.1	0.834279	0.947582	97.7397	141	81.5423	140	92.6164	223
1325	MYO_113400	CP003265	complement(1463423..1465735)	2313	hypothetical protein	similar to sll1608	AGF51592.1	1.00308	0.947483	35.8382	129	35.9484	154	33.9561	204
2150	rpl35	CP003265	complement(2402378..2402581)	204	50S ribosomal protein L35	similar to ssl1426	AGF52417.1	0.993444	0.947364	1105.63	351	1098.38	415	1047.43	555
508	MYO_15150	CP003265	562059..562547	489	hypothetical protein	similar to slr1851	AGF50775.1	0.352358	0.947033	40.7366	31	14.3539	13	38.5789	49
212	MYO_12140	CP003265	complement(236356..237438)	1083	alanine dehydrogenase	similar to sll1682	AGF50479.1	1.11128	0.947033	18.3935	31	20.4404	41	17.4193	49
1643	lytR	CP003265	complement(1805802..1807193)	1392	membrane bound protein LytR	similar to sll1872	AGF51910.1	0.935104	0.947033	28.621	62	26.7636	69	27.105	98
1900	MYO_119240	CP003265	complement(2087294..2088898)	1605	hypothetical protein	similar to sll0424	AGF52167.1	0.650507	0.947033	12.4113	31	8.07366	24	11.7539	49
2033	ycf47	CP003265	2247508..2247741	234	preprotein translocase SecG subunit	similar to ssr3307	AGF52300.1	0.870247	0.946861	307.563	112	267.656	116	291.219	177
737	bfr_1	CP003265	822492..823022	531	bacterioferritin	similar to slr1890	AGF51004.1	1.1624	0.946833	233.558	193	271.488	267	221.14	305
891	MYO_19010	CP003265	982623..982835	213	high light inducible protein	similar to ssr2595	AGF51158.1	0.803706	0.946473	208.162	69	167.301	66	197.02	109
1934	psbV	CP003265	complement(2128884..2129366)	483	cytochrome c550	similar to sll0258	AGF52201.1	1.12936	0.946175	1318.43	991	1488.99	1332	1247.47	1565
1095	MYO_111080	CP003265	complement(1221407..1221679)	273	hypothetical protein	similar to ssl3383	AGF51362.1	1.1498	0.946016	89.4443	38	102.843	52	84.6158	60
3172	MYO_2130	CP003266 (pSYSM_M)	17880..18800	921	hypothetical protein	similar to slr5012	AGF53439.1	0.619123	0.946016	13.2564	19	8.20735	14	12.5408	30
2667	MYO_127050	CP003265	complement(2980963..2982015)	1053	hypothetical protein	similar to sll0098	AGF52934.1	0.960828	0.94587	131.813	216	126.649	247	124.678	341
1615	MYO_116340	CP003265	1771815..1774619	2805	hypothetical protein	similar to slr1968	AGF51882.1	0.918261	0.945791	32.0721	140	29.4505	153	30.3335	221
2917	murC	CP003265	3276658..3278175	1518	UDP-N-acetylmuramate-alanine ligase	similar to slr1423	AGF53184.1	1.0236	0.945682	199.803	472	204.517	575	188.95	745
538	phoH	CP003265	592759..593745	987	phosphate starvation-inducible protein	similar to slr2047	AGF50805.1	1.02404	0.945523	41.6672	64	42.6689	78	39.3973	101
2066	ndhD_2	CP003265	2285215..2286792	1578	NADH dehydrogenase subunit 4	similar to slr0331	AGF52333.1	0.967093	0.945402	250.845	616	242.59	709	237.149	972
901	MYO_19120	CP003265	complement(992476..993138)	663	hypothetical protein	similar to sll1461	AGF51168.1	0.980278	0.945315	87.229	90	85.5087	105	82.4589	142
1195	MYO_112080	CP003265	1321157..1322083	927	hypothetical protein	similar to slr1736	AGF51462.1	0.858911	0.945315	31.1935	45	26.7925	46	29.4877	71
2341	MYO_123770	CP003265	2614708..2615157	450	hypothetical protein	similar to slr0483	AGF52608.1	1.15429	0.945286	1295.17	907	1495	1246	1224.31	1431
599	MYO_16080	CP003265	666949..667344	396	CheY subfamily	similar to slr1037	AGF50866.1	1.22804	0.944803	42.19	26	51.8111	38	39.8613	41
2564	gidB	CP003265	2866035..2866829	795	glucose inhibited division protein B	similar to slr0072	AGF52831.1	1.08262	0.944803	42.0308	52	45.5032	67	39.7109	82
2665	ama_1	CP003265	complement(2978277..2979458)	1182	N-acyl-L-amino acid amidohydrolase	similar to sll0100	AGF52932.1	0.791763	0.944803	28.2695	52	22.3827	49	26.7091	82
126	bcp_1	CP003265	144061..144543	483	bacterioferritin comigratory protein	similar to slr0242	AGF50393.1	1.11082	0.944413	78.494	59	87.193	78	74.1308	93
663	MYO_16720	CP003265	734486..735721	1236	lysostaphin	similar to slr1708	AGF50930.1	0.927846	0.944148	219.395	422	203.564	466	207.141	665
793	MYO_18020	CP003265	complement(869323..872925)	3603	chromosome segregation protein SMC1	similar to sll1120	AGF51060.1	0.768898	0.943934	18.9049	106	14.5359	97	17.8449	167
1092	MYO_111050	CP003265	complement(1218124..1218888)	765	hypothetical protein	similar to sll1771	AGF51359.1	1.39272	0.943856	61.3187	73	85.4001	121	57.8761	115
516	psbF	CP003265	570442..570576	135	cytochrome b559 b subunit	similar to smr0006	AGF50783.1	1.13628	0.943729	918.661	193	1043.86	261	866.967	304
2576	gspE_2	CP003265	2878646..2881087	2442	general secretion pathway protein E	similar to slr0079	AGF52843.1	0.930323	0.94368	134.991	513	125.585	568	127.388	808
554	amiA_1	CP003265	613303..614319	1017	N-acetylmuramoyl-L-alanine amidase	similar to slr1910	AGF50821.1	1.32338	0.943651	25.2738	40	33.4468	63	23.8497	63
2113	MYO_121410	CP003265	complement(2344767..2347178)	2412	hypothetical protein	similar to sll0350	AGF52380.1	0.74046	0.943651	42.626	160	31.5628	141	40.2241	252
1018	MYO_110310	CP003265	1133534..1134763	1230	hypothetical protein	similar to slr0876	AGF51285.1	1.08678	0.943561	87.2455	167	94.8163	216	82.3215	263
242	MYO_12450	CP003265	complement(266702..268471)	1770	hypothetical protein	similar to sll1665	AGF50509.1	1.0232	0.943391	396.806	1093	406.012	1331	374.343	1721
2872	purE	CP003265	complement(3224648..3225178)	531	phosphoribosylaminoimidazole carboxylase	similar to sll0901	AGF53139.1	1.09052	0.943332	56.8768	47	62.0254	61	53.6537	74
[truncated: 1,562 more rows]
