# Supplementary material for: Biosynthesis of a sulfated exopolysaccharide, synechan, and bloom formation in the model cyanobacterium Synechocystis sp. strain PCC 6803
Source: eLife. 2021 Jun 15;10:e66538. doi: 10.7554/eLife.66538 (PMC8205485; doi:10.7554/eLife.66538)
Supplement: Source data 1. [file elife-66538-data1.xlsx]

## Sheet: 6803WTvsNM
							motile (WT)					nonmotile (NM)
	Name	Chromosome	Region	Gene length	Protein id	RPKM ratio WT/NM	Expression value	TPM	RPKM	Unique gene reads	Total gene reads	Expression value	TPM	RPKM	Unique gene reads	Total gene reads
1	sll5132	AP004310 (pSYSM)	complement(join(118399..119895,1..27))	1524	BAD01902.1	0.955567	4.65832	5.15965	4.65832	11	11	4.87493	4.52394	4.87493	13	13
2	ssl5001	AP004310 (pSYSM)	complement(195..374)	180	BAD01771.1	2.25861	14.342	15.8855	14.342	4	4	6.34991	5.89272	6.34991	2	2
3	sll5002	AP004310 (pSYSM)	complement(574..921)	348	BAD01772.1	1.14845	111.274	123.249	111.274	60	60	96.8908	89.9148	96.8908	59	59
4	sll5003	AP004310 (pSYSM)	complement(1136..1540)	405	BAD01773.1	0.878349	11.1549	12.3554	11.1549	7	7	12.6998	11.7854	12.6998	9	9
5	sll5004	AP004310 (pSYSM)	complement(1515..1826)	312	BAD01774.1	1.08413	49.6453	54.9881	49.6453	24	24	45.7926	42.4956	45.7926	25	25
6	slr5005	AP004310 (pSYSM)	2528..13921	11394	BAD01775.1	2.08905	34.892	38.6471	34.892	616	616	16.7024	15.4998	16.7024	333	333
7	sll5006	AP004310 (pSYSM)	complement(14579..15133)	555	BAD01776.1	2.03275	20.9315	23.1842	20.9315	16	18	10.2971	9.55577	10.2971	8	10
8	ssl5007	AP004310 (pSYSM)	complement(15233..15481)	249	BAD01777.1	1.12931	2.59192	2.87087	2.59192	1	1	2.29515	2.1299	2.29515	1	1
9	ssl5008	AP004310 (pSYSM)	complement(15639..15812)	174	BAD01778.1	#DIV/0!	0	0	0	0	0	0	0	0	0	0
10	ssr5009	AP004310 (pSYSM)	15996..16235	240	BAD01779.1	0.730728	29.5803	32.7638	29.5803	11	11	40.4807	37.5661	40.4807	17	17
11	slr5010	AP004310 (pSYSM)	16603..17166	564	BAD01780.1	0.996447	17.1646	19.0118	17.1646	9	15	17.2258	15.9856	17.2258	11	17
12	ssr5011	AP004310 (pSYSM)	17218..17439	222	BAD01781.1	0.376435	2.90716	3.22002	2.90716	1	1	7.72286	7.16683	7.72286	3	3
13	slr5012	AP004310 (pSYSM)	17880..18800	921	BAD01782.1	0.631083	13.3142	14.7471	13.3142	19	19	21.0974	19.5784	21.0974	34	34
14	slr5013	AP004310 (pSYSM)	18822..20513	1692	BAD01783.1	0.483988	4.57723	5.06983	4.57723	12	12	9.45731	8.7764	9.45731	28	28
15	sll5014	AP004310 (pSYSM)	complement(20523..21479)	957	BAD01784.1	0.451723	2.69755	2.98786	2.69755	4	4	5.9717	5.54175	5.9717	10	10
16	ssl5015	AP004310 (pSYSM)	complement(21479..21760)	282	BAD01785.1	0.564653	2.28861	2.53491	2.28861	1	1	4.05313	3.76131	4.05313	2	2
17	slr5016	AP004310 (pSYSM)	21843..23219	1377	BAD01786.1	1.27047	4.21823	4.67219	4.21823	9	9	3.32021	3.08116	3.32021	8	8
18	slr5017	AP004310 (pSYSM)	23255..23572	318	BAD01787.1	0.806647	10.1476	11.2397	10.1476	5	5	12.58	11.6743	12.58	7	7
19	slr5018	AP004310 (pSYSM)	23562..23903	342	BAD01788.1	0.955567	20.7581	22.9921	20.7581	11	11	21.7234	20.1593	21.7234	13	13
20	ssr5019	AP004310 (pSYSM)	23890..24099	210	BAD01789.1	1.12931	9.21984	10.2121	9.21984	3	3	8.16417	7.57636	8.16417	3	3
21	ssr5020	AP004310 (pSYSM)	24181..24462	282	BAD01790.1	2.25861	22.8861	25.3491	22.8861	10	10	10.1328	9.40328	10.1328	5	5
22	slr5021	AP004310 (pSYSM)	24473..24787	315	BAD01791.1	2.03275	36.8794	40.8483	36.8794	18	18	18.1426	16.8364	18.1426	10	10
23	slr5022	AP004310 (pSYSM)	24798..25955	1158	BAD01792.1	1.443	12.8186	14.1981	12.8186	23	23	8.88329	8.24371	8.88329	18	18
24	slr5023	AP004310 (pSYSM)	25994..27175	1182	BAD01793.1	0.838913	14.1964	15.7242	14.1964	26	26	16.9223	15.704	16.9223	35	35
25	slr5024	AP004310 (pSYSM)	27175..27735	561	BAD01794.1	0.948617	24.1589	26.7589	24.1589	21	21	25.4675	23.6339	25.4675	25	25
26	ssl5025	AP004310 (pSYSM)	complement(27859..28053)	195	BAD01795.1	0.766315	62.8841	69.6516	62.8841	19	19	82.0603	76.1521	82.0603	28	28
27	sll5026	AP004310 (pSYSM)	complement(28096..30168)	2073	BAD01796.1	1.62338	28.6424	31.7249	28.6424	92	92	17.6437	16.3734	17.6437	64	64
28	ssl5027	AP004310 (pSYSM)	complement(30281..30574)	294	BAD01797.1	11.2931	21.952	24.3145	21.952	10	10	1.94385	1.80389	1.94385	1	1
29	sll5028	AP004310 (pSYSM)	complement(30677..30988)	312	BAD01798.1	2.25861	99.2906	109.976	99.2906	48	48	43.9609	40.7958	43.9609	24	24
30	slr5029	AP004310 (pSYSM)	31397..32062	666	BAD01799.1	0.878349	13.5667	15.0268	13.5667	10	14	15.4457	14.3337	15.4457	18	18
31	sll5030	AP004310 (pSYSM)	complement(32015..32836)	822	BAD01800.1	1.23014	47.8938	53.0481	47.8938	61	61	38.9337	36.1306	38.9337	56	56
32	ssl5031	AP004310 (pSYSM)	complement(32865..32978)	114	BAD01801.1	1.12931	28.3065	31.3529	28.3065	5	5	25.0654	23.2608	25.0654	5	5
33	sll5032	AP004310 (pSYSM)	complement(33000..33350)	351	BAD01802.1	1.12931	44.1292	48.8783	44.1292	24	24	39.0763	36.2629	39.0763	24	24
34	sll5033	AP004310 (pSYSM)	complement(33422..33961)	540	BAD01803.1	0.876698	70.5147	78.1035	70.5147	59	59	80.4322	74.6412	80.4322	76	76
35	sll5034	AP004310 (pSYSM)	complement(34001..34624)	624	BAD01804.1	0.662007	70.3309	77.8998	70.3309	68	68	106.239	98.5898	106.239	116	116
36	sll5035	AP004310 (pSYSM)	complement(34736..35074)	339	BAD01805.1	0.705816	57.1141	63.2607	57.1141	30	30	80.9192	75.0931	80.9192	48	48
37	sll5036	AP004310 (pSYSM)	complement(35079..36365)	1287	BAD01806.1	2.33928	14.5426	16.1076	14.5426	29	29	6.21669	5.7691	6.21669	14	14
38	slr5037	AP004310 (pSYSM)	36483..36866	384	BAD01807.1	3.1997	28.5719	31.6468	28.5719	17	17	8.92956	8.28664	8.92956	6	6
39	slr5038	AP004310 (pSYSM)	36906..38144	1239	BAD01808.1	2.61794	26.5657	29.4246	26.5657	51	51	10.1476	9.41694	10.1476	22	22
40	ssl5039	AP004310 (pSYSM)	complement(38437..38730)	294	BAD01809.1	1.02664	21.952	24.3145	21.952	10	10	21.3823	19.8428	21.3823	11	11
41	slr5040	AP004310 (pSYSM)	38994..39641	648	BAD01810.1	1.45197	8.96374	9.92841	8.96374	4	9	6.17352	5.72904	6.17352	5	7
42	sll5041	AP004310 (pSYSM)	complement(39660..40208)	549	BAD01811.1	1.23197	14.1069	15.625	14.1069	12	12	11.4507	10.6262	11.4507	11	11
43	sll5042	AP004310 (pSYSM)	complement(40411..41253)	843	BAD01812.1	1.64018	46.7007	51.7267	46.7007	61	61	28.4729	26.4229	28.4729	42	42
44	sll5043	AP004310 (pSYSM)	complement(41411..42397)	987	BAD01813.1	4.38437	43.1567	47.8012	43.1567	66	66	9.84332	9.13462	9.84332	17	17
45	sll5044	AP004310 (pSYSM)	complement(42442..43083)	642	BAD01814.1	11.9706	53.2798	59.0137	53.2798	53	53	4.45087	4.13041	4.45087	5	5
46	ssl5045	AP004310 (pSYSM)	complement(43110..43292)	183	BAD01815.1	12.4224	77.5878	85.9377	77.5878	22	22	6.24581	5.79612	6.24581	2	2
47	sll5046	AP004310 (pSYSM)	complement(43343..44293)	951	BAD01816.1	12.14	291.816	323.221	291.816	430	430	24.0375	22.3068	24.0375	40	40
48	sll5047	AP004310 (pSYSM)	complement(44338..45855)	1518	BAD01817.1	2.06221	17.8566	19.7783	17.8566	42	42	8.65896	8.03553	8.65896	23	23
49	sll5048	AP004310 (pSYSM)	complement(45852..46940)	1089	BAD01818.1	2.48447	71.7099	79.4273	71.7099	121	121	28.8632	26.7851	28.8632	55	55
50	sll5049	AP004310 (pSYSM)	complement(46945..48288)	1344	BAD01819.1	1.96499	41.7774	46.2735	41.7774	87	87	21.2608	19.7301	21.2608	50	50
51	sll5050	AP004310 (pSYSM)	complement(48291..49616)	1326	BAD01820.1	0.796306	26.7695	29.6505	26.7695	55	55	33.6172	31.1968	33.6172	78	78
52	slr5051	AP004310 (pSYSM)	49707..50099	393	BAD01821.1	2.06795	231.552	256.471	231.552	141	141	111.972	103.91	111.972	77	77
53	sll5052	AP004310 (pSYSM)	complement(50111..52333)	2223	BAD01822.1	1.22751	29.0323	32.1568	29.0323	100	100	23.6515	21.9486	23.6515	92	92
54	slr5053	AP004310 (pSYSM)	52552..52992	441	BAD01823.1	6.77584	43.904	48.6289	43.904	30	30	6.4795	6.01298	6.4795	5	5
55	slr5054	AP004310 (pSYSM)	53037..54026	990	BAD01824.1	1.47679	33.2473	36.8254	33.2473	51	51	22.5133	20.8924	22.5133	39	39
56	slr5055	AP004310 (pSYSM)	54119..54910	792	BAD01825.1	31.5641	455.521	504.544	455.521	559	559	14.4316	13.3926	14.4316	20	20
57	slr5056	AP004310 (pSYSM)	54911..56281	1371	BAD01826.1	5.16254	120.51	133.48	120.51	256	256	23.3432	21.6625	23.3432	56	56
58	sll5057	AP004310 (pSYSM)	complement(56854..57807)	954	BAD01827.1	40.8701	514.146	569.479	514.146	760	760	12.58	11.6743	12.58	21	21
59	slr5058	AP004310 (pSYSM)	57972..60323	2352	BAD01828.1	1.97878	54.3312	60.1783	54.3312	198	198	27.4569	25.48	27.4569	113	113
60	sll5059	AP004310 (pSYSM)	complement(60291..61199)	909	BAD01829.1	0.881787	40.4699	44.8253	40.4699	57	57	45.8954	42.591	45.8954	73	73
61	sll5060	AP004310 (pSYSM)	complement(61202..64831)	3630	BAD01830.1	1.09878	12.8011	14.1788	12.8011	72	72	11.6502	10.8114	11.6502	74	74
62	sll5061	AP004310 (pSYSM)	complement(64868..65245)	378	BAD01831.1	0.910731	42.6845	47.2781	42.6845	25	25	46.8684	43.4939	46.8684	31	31
63	sll5062	AP004310 (pSYSM)	complement(65331..65786)	456	BAD01832.1	0.790514	19.8146	21.947	19.8146	14	14	25.0654	23.2608	25.0654	20	20
64	sll5063	AP004310 (pSYSM)	complement(65758..66411)	654	BAD01833.1	5.08188	97.6965	108.211	97.6965	99	99	19.2245	17.8404	19.2245	22	22
65	ssl5064	AP004310 (pSYSM)	complement(66782..67072)	291	BAD01834.1	0.868697	22.1783	24.5651	22.1783	10	10	25.5306	23.6924	25.5306	13	13
66	ssl5065	AP004310 (pSYSM)	complement(67163..67378)	216	BAD01835.1	0.564653	5.97582	6.61894	5.97582	2	2	10.5832	9.82121	10.5832	4	4
67	sll5066	AP004310 (pSYSM)	complement(67362..67976)	615	BAD01836.1	0.728585	20.9883	23.247	20.9883	20	20	28.8069	26.7328	28.8069	31	31
68	sll5067	AP004310 (pSYSM)	complement(68050..68574)	525	BAD01837.1	1.12931	2.45862	2.72322	2.45862	2	2	2.17711	2.02036	2.17711	2	2
69	ssl5068	AP004310 (pSYSM)	complement(69121..69348)	228	BAD01838.1	1.50574	22.6452	25.0823	22.6452	5	8	15.0393	13.9565	15.0393	5	6
70	sll5069	AP004310 (pSYSM)	complement(69335..70810)	1476	BAD01839.1	1.47501	27.9843	30.996	27.9843	59	64	18.9723	17.6063	18.9723	45	49
71	ssl5070	AP004310 (pSYSM)	complement(71192..71446)	255	BAD01840.1	1.97629	70.8662	78.4928	70.8662	28	28	35.8583	33.2766	35.8583	16	16
72	slr5071	AP004310 (pSYSM)	71474..71818	345	BAD01841.1	0.969018	248.802	275.578	248.802	133	133	256.757	238.271	256.757	155	155
73	sll5072	AP004310 (pSYSM)	complement(71882..72190)	309	BAD01842.1	0.645318	58.4819	64.7756	58.4819	28	28	90.6249	84.1	90.6249	49	49
74	slr5073	AP004310 (pSYSM)	72425..73159	735	BAD01843.1	0.967977	10.537	11.6709	10.537	12	12	10.8856	10.1018	10.8856	14	14
75	ssr5074	AP004310 (pSYSM)	73270..73485	216	BAD01844.1	0.0941089	2.98791	3.30947	2.98791	1	1	31.7495	29.4636	31.7495	12	12
76	sll5075	AP004310 (pSYSM)	complement(73728..74147)	420	BAD01845.1	0.240919	24.5862	27.2322	24.5862	16	16	102.052	94.7045	102.052	75	75
77	sll5076	AP004310 (pSYSM)	complement(74510..75055)	546	BAD01846.1	0.297186	5.91016	6.5462	5.91016	5	5	19.8871	18.4552	19.8871	19	19
78	slr5077	AP004310 (pSYSM)	75147..75929	783	BAD01847.1	1.66707	51.1036	56.6033	51.1036	60	62	30.6547	28.4476	30.6547	40	42
79	slr5078	AP004310 (pSYSM)	76050..76988	939	BAD01848.1	1.06477	22.6814	25.1224	22.6814	33	33	21.3016	19.7679	21.3016	35	35
80	sll5079	AP004310 (pSYSM)	complement(77192..78010)	819	BAD01849.1	1.68019	48.0693	53.2425	48.0693	61	61	28.6095	26.5496	28.6095	41	41
81	sll5080	AP004310 (pSYSM)	complement(78057..78881)	825	BAD01850.1	1.22123	72.7529	80.5826	72.7529	93	93	59.5737	55.2845	59.5737	86	86
82	sll5081	AP004310 (pSYSM)	complement(79505..80293)	789	BAD01851.1	0.376435	8.99782	9.96616	8.99782	11	11	23.9027	22.1817	23.9027	33	33
83	slr5082	AP004310 (pSYSM)	80783..81613	831	BAD01852.1	2.14568	44.2686	49.0327	44.2686	49	57	20.6315	19.146	20.6315	27	30
84	sll5083	AP004310 (pSYSM)	complement(82309..84186)	1878	BAD01853.1	0.825911	16.8392	18.6515	16.8392	49	49	20.3887	18.9207	20.3887	67	67
85	sll5084	AP004310 (pSYSM)	complement(84439..85155)	717	BAD01854.1	1.58103	6.30087	6.97897	6.30087	7	7	3.9853	3.69836	3.9853	5	5
86	slr5085	AP004310 (pSYSM)	85149..85469	321	BAD01855.1	2.25861	4.02112	4.45387	4.02112	2	2	1.78035	1.65217	1.78035	1	1
87	sll5086	AP004310 (pSYSM)	complement(85552..86982)	1431	BAD01856.1	1.03823	25.7073	28.4739	25.7073	57	57	24.7606	22.9779	24.7606	62	62
88	slr5087	AP004310 (pSYSM)	87601..88020	420	BAD01857.1	2.39978	26.1229	28.9342	26.1229	17	17	10.8856	10.1018	10.8856	8	8
89	slr5088	AP004310 (pSYSM)	88114..88830	717	BAD01858.1	1.12931	11.7016	12.9609	11.7016	13	13	10.3618	9.61574	10.3618	13	13
90	sll5089	AP004310 (pSYSM)	complement(88902..89669)	768	BAD01859.1	1.24224	18.4877	20.4773	18.4877	22	22	14.8826	13.8111	14.8826	20	20
91	sll5090	AP004310 (pSYSM)	complement(89699..90253)	555	BAD01860.1	1.58103	40.7002	45.0803	40.7002	31	35	25.7429	23.8894	25.7429	23	25
92	ssl5091	AP004310 (pSYSM)	complement(90353..90601)	249	BAD01861.1	0	0	0	0	0	0	4.59029	4.2598	4.59029	2	2
93	ssr5092	AP004310 (pSYSM)	90973..91218	246	BAD01862.1	#DIV/0!	2.62353	2.90588	2.62353	1	1	0	0	0	0	0
94	slr5093	AP004310 (pSYSM)	91316..92692	1377	BAD01863.1	0.439175	3.28084	3.63393	3.28084	7	7	7.47048	6.93262	7.47048	18	18
95	sll5094	AP004310 (pSYSM)	complement(92805..93236)	432	BAD01864.1	0.645318	11.9516	13.2379	11.9516	8	8	18.5206	17.1871	18.5206	14	14
96	ssl5095	AP004310 (pSYSM)	complement(93233..93520)	288	BAD01865.1	1.12931	44.8187	49.642	44.8187	20	20	39.6869	36.8295	39.6869	20	20
97	ssl5096	AP004310 (pSYSM)	complement(93656..93865)	210	BAD01866.1	5.64653	15.3664	17.0201	15.3664	5	5	2.72139	2.52545	2.72139	1	1
98	sll5097	AP004310 (pSYSM)	complement(93862..94866)	1005	BAD01867.1	1.64263	20.5497	22.7612	20.5497	32	32	12.5103	11.6095	12.5103	22	22
99	ssl5098	AP004310 (pSYSM)	complement(94925..95137)	213	BAD01868.1	4.32901	139.38	154.38	139.38	46	46	32.1967	29.8786	32.1967	12	12
100	ssl5099	AP004310 (pSYSM)	complement(95256..95549)	294	BAD01869.1	0.878349	15.3664	17.0201	15.3664	7	7	17.4946	16.2351	17.4946	9	9
101	ssl5100	AP004310 (pSYSM)	complement(95697..95903)	207	BAD01870.1	0.188218	3.11782	3.45336	3.11782	1	1	16.565	15.3723	16.565	6	6
102	slr5101	AP004310 (pSYSM)	96124..96561	438	BAD01871.1	0.928541	54.5192	60.3865	54.5192	37	37	58.7149	54.4875	58.7149	45	45
103	slr5102	AP004310 (pSYSM)	96554..97156	603	BAD01872.1	0.941089	16.0545	17.7822	16.0545	15	15	17.0595	15.8312	17.0595	18	18
104	ssl5103	AP004310 (pSYSM)	complement(97547..97735)	189	BAD01873.1	0.282327	6.82951	7.5645	6.82951	2	2	24.1901	22.4485	24.1901	7	8
105	sll5104	AP004310 (pSYSM)	complement(97790..98224)	435	BAD01874.1	0.522827	37.0913	41.0831	37.0913	7	25	70.9438	65.8359	70.9438	32	54
106	slr5105	AP004310 (pSYSM)	98614..99219	606	BAD01875.1	0.699094	27.69	30.6699	27.69	15	26	39.6083	36.7566	39.6083	27	42
107	ssr5106	AP004310 (pSYSM)	99216..99449	234	BAD01876.1	1.50574	22.0646	24.4392	22.0646	8	8	14.6536	13.5986	14.6536	6	6
108	sll5107	AP004310 (pSYSM)	complement(99565..99981)	417	BAD01877.1	3.38792	18.5723	20.5711	18.5723	6	12	5.48193	5.08724	5.48193	3	4
109	ssl5108	AP004310 (pSYSM)	complement(100584..100811)	228	BAD01878.1	1.63122	36.7985	40.7587	36.7985	13	13	22.5589	20.9347	22.5589	9	9
110	sll5109	AP004310 (pSYSM)	complement(100798..102288)	1491	BAD01879.1	1.41163	23.8071	26.3692	23.8071	47	55	16.8649	15.6507	16.8649	43	44
111	slr5110	AP004310 (pSYSM)	102741..103151	411	BAD01880.1	1.49031	252.817	280.025	252.817	161	161	169.64	157.426	169.64	122	122
112	slr5111	AP004310 (pSYSM)	103631..104083	453	BAD01881.1	4.31453	212.28	235.126	212.28	149	149	49.2013	45.6589	49.2013	39	39
113	slr5112	AP004310 (pSYSM)	104141..105274	1134	BAD01882.1	2.03275	20.4885	22.6935	20.4885	36	36	10.0792	9.35353	10.0792	20	20
114	ssl5113	AP004310 (pSYSM)	complement(105753..106043)	291	BAD01883.1	2.53238	164.12	181.782	164.12	74	74	64.8083	60.1422	64.8083	33	33
115	ssl5114	AP004310 (pSYSM)	complement(106087..106371)	285	BAD01884.1	1.08748	58.8776	65.214	58.8776	26	26	54.1413	50.2432	54.1413	27	27
116	slr5115	AP004310 (pSYSM)	106537..106950	414	BAD01885.1	1.4373	87.299	96.6941	87.299	56	56	60.7382	56.3652	60.7382	44	44
117	slr5116	AP004310 (pSYSM)	107105..107527	423	BAD01886.1	0.443656	16.7832	18.5894	16.7832	11	11	37.8292	35.1056	37.8292	28	28
118	ssr5117	AP004310 (pSYSM)	107531..107746	216	BAD01887.1	0.627392	14.9396	16.5473	14.9396	5	5	23.8121	22.0977	23.8121	9	9
119	slr5118	AP004310 (pSYSM)	107767..108585	819	BAD01888.1	2.40433	52.0094	57.6066	52.0094	65	66	21.6316	20.0741	21.6316	31	31
120	slr5119	AP004310 (pSYSM)	108733..109503	771	BAD01889.1	2.13674	220.152	243.845	220.152	251	263	103.032	95.6135	103.032	135	139
121	ssr5120	AP004310 (pSYSM)	109617..109907	291	BAD01890.1	7.40323	130.852	144.934	130.852	59	59	17.675	16.4024	17.675	9	9
122	ssr5121	AP004310 (pSYSM)	110068..110283	216	BAD01891.1	0.84698	44.8187	49.642	44.8187	15	15	52.9159	49.106	52.9159	19	20
123	sll5122	AP004310 (pSYSM)	complement(110524..111786)	1263	BAD01892.1	1.74529	8.68695	9.62183	8.68695	16	17	4.97736	4.619	4.97736	11	11
124	sll5123	AP004310 (pSYSM)	complement(111783..112217)	435	BAD01893.1	1.83512	19.2875	21.3632	19.2875	13	13	10.5102	9.75347	10.5102	8	8
125	slr5124	AP004310 (pSYSM)	112352..113182	831	BAD01894.1	2.25861	34.1722	37.8498	34.1722	44	44	15.1297	14.0404	15.1297	22	22
126	ssl5125	AP004310 (pSYSM)	complement(113239..113463)	225	BAD01895.1	3.57614	54.4995	60.3647	54.4995	19	19	15.2398	14.1425	15.2398	6	6
127	slr5126	AP004310 (pSYSM)	113953..114423	471	BAD01896.1	0.663079	87.6962	97.134	87.6962	64	64	132.256	122.734	132.256	109	109
128	slr5127	AP004310 (pSYSM)	114514..115284	771	BAD01897.1	0.409529	27.6237	30.5965	27.6237	33	33	67.4523	62.5959	67.4523	91	91
129	sll5128	AP004310 (pSYSM)	complement(115503..116540)	1038	BAD01898.1	1.03986	57.8239	64.0468	57.8239	93	93	55.6076	51.6039	55.6076	101	101
130	ssl5129	AP004310 (pSYSM)	complement(116636..116830)	195	BAD01899.1	0.752871	6.61937	7.33175	6.61937	2	2	8.79218	8.15916	8.79218	3	3
131	sll5130	AP004310 (pSYSM)	complement(116886..117293)	408	BAD01900.1	0.188218	1.58184	1.75207	1.58184	1	1	8.40429	7.79919	8.40429	6	6
132	sll5131	AP004310 (pSYSM)	complement(117345..118361)	1017	BAD01901.1	#DIV/0!	0	0	0	0	0	0	0	0	0	0
133	sll7106	AP004311 (pSYSA)	complement(join(101524..103307,1..85))	1869	BAD02008.1	0.790514	2.41719	2.67732	2.41719	7	7	3.05774	2.83759	3.05774	10	10
134	sll7001	AP004311 (pSYSA)	complement(182..490)	309	BAD01903.1	0.322659	4.17728	4.62683	4.17728	2	2	12.9464	12.0143	12.9464	7	7
135	sll7002	AP004311 (pSYSA)	complement(706..1287)	582	BAD01904.1	1.12931	2.21783	2.45651	2.21783	2	2	1.96389	1.82249	1.96389	1	2
136	sll7003	AP004311 (pSYSA)	complement(1399..1827)	429	BAD01905.1	1.12931	30.0881	33.3261	30.0881	20	20	26.643	24.7247	26.643	20	20
137	ssl7004	AP004311 (pSYSA)	complement(1799..2032)	234	BAD01906.1	1.31752	57.9195	64.1528	57.9195	21	21	43.9609	40.7958	43.9609	18	18
138	slr7005	AP004311 (pSYSA)	2399..2965	567	BAD01907.1	0.307993	3.41476	3.78225	3.41476	3	3	11.0871	10.2889	11.0871	11	11
139	sll7006	AP004311 (pSYSA)	complement(3041..3364)	324	BAD01908.1	0.821314	15.9355	17.6505	15.9355	8	8	19.4025	18.0055	19.4025	11	11
140	ssl7007	AP004311 (pSYSA)	complement(3367..3591)	225	BAD01909.1	0.903445	34.4207	38.1251	34.4207	12	12	38.0994	35.3563	38.0994	15	15
141	slr7008	AP004311 (pSYSA)	4241..5257	1017	BAD01910.1	3.95257	4.44221	4.92027	4.44221	2	7	1.12388	1.04296	1.12388	0	2
142	sll7009	AP004311 (pSYSA)	complement(5340..6284)	945	BAD01911.1	0.41606	9.56132	10.5903	9.56132	14	14	22.9806	21.326	22.9806	38	38
143	slr7010	AP004311 (pSYSA)	6349..8517	2169	BAD01912.1	1.12931	10.4143	11.5351	10.4143	35	35	9.22186	8.5579	9.22186	35	35
144	slr7011	AP004311 (pSYSA)	8531..11458	2928	BAD01913.1	0.956453	18.2948	20.2637	18.2948	83	83	19.1278	17.7506	19.1278	98	98
145	slr7012	AP004311 (pSYSA)	11524..12513	990	BAD01914.1	0.507035	14.342	15.8855	14.342	22	22	28.2859	26.2494	28.2859	49	49
146	slr7013	AP004311 (pSYSA)	12674..13438	765	BAD01915.1	0.322659	5.06187	5.60663	5.06187	6	6	15.688	14.5585	15.688	21	21
147	slr7014	AP004311 (pSYSA)	13441..14229	789	BAD01916.1	0.645318	6.54387	7.24812	6.54387	8	8	10.1405	9.41043	10.1405	14	14
148	slr7015	AP004311 (pSYSA)	14222..14794	573	BAD01917.1	0.941089	5.63167	6.23774	5.63167	5	5	5.98421	5.55335	5.98421	6	6
149	slr7016	AP004311 (pSYSA)	14804..15781	978	BAD01918.1	0.61843	15.1779	16.8113	15.1779	23	23	24.5426	22.7756	24.5426	42	42
150	ssr7017	AP004311 (pSYSA)	15813..16097	285	BAD01919.1	0.205328	4.52905	5.01646	4.52905	2	2	22.0576	20.4695	22.0576	11	11
151	ssr7018	AP004311 (pSYSA)	17795..18016	222	BAD01920.1	0.0684428	11.6286	12.8801	11.6286	4	4	169.903	157.67	169.903	62	66
152	ssl7019	AP004311 (pSYSA)	complement(18056..18313)	258	BAD01921.1	0.130934	20.0121	22.1658	20.0121	8	8	152.841	141.836	152.841	68	69
153	ssl7020	AP004311 (pSYSA)	complement(19089..19259)	171	BAD01922.1	0.120997	11.3226	12.5411	11.3226	3	3	93.5776	86.8401	93.5776	28	28
154	ssl7021	AP004311 (pSYSA)	complement(19594..19779)	186	BAD01923.1	0.141163	3.46983	3.84326	3.46983	1	1	24.5803	22.8105	24.5803	8	8
155	ssl7022	AP004311 (pSYSA)	complement(19808..19996)	189	BAD01924.1	0	0	0	0	0	0	12.0951	11.2242	12.0951	4	4
156	slr7023	AP004311 (pSYSA)	20266..22182	1917	BAD01925.1	1.12931	14.4766	16.0346	14.4766	43	43	12.8191	11.8961	12.8191	43	43
157	slr7024	AP004311 (pSYSA)	22328..24058	1731	BAD01926.1	0.520367	17.5236	19.4094	17.5236	47	47	33.6754	31.2508	33.6754	102	102
158	slr7025	AP004311 (pSYSA)	24079..24495	417	BAD01927.1	0.84698	18.5723	20.5711	18.5723	12	12	21.9277	20.349	21.9277	16	16
159	slr7026	AP004311 (pSYSA)	24509..24886	378	BAD01928.1	0.199289	5.12214	5.67338	5.12214	3	3	25.702	23.8515	25.702	17	17
160	sll7027	AP004311 (pSYSA)	complement(24925..25509)	585	BAD01929.1	0.161329	1.10323	1.22196	1.10323	1	1	6.83836	6.34601	6.83836	7	7
161	sll7028	AP004311 (pSYSA)	complement(26352..27608)	1257	BAD01930.1	0.691068	21.0509	23.3164	21.0509	41	41	30.4614	28.2682	30.4614	67	67
162	sll7029	AP004311 (pSYSA)	complement(27605..28630)	1026	BAD01931.1	1.05231	25.7904	28.5659	25.7904	41	41	24.5084	22.7438	24.5084	44	44
163	sll7030	AP004311 (pSYSA)	complement(28850..29353)	504	BAD01932.1	0.274696	11.5248	12.7651	11.5248	9	9	41.9547	38.9341	41.9547	37	37
164	sll7031	AP004311 (pSYSA)	complement(29337..29639)	303	BAD01933.1	0.524321	27.69	30.6699	27.69	13	13	52.8111	49.0088	52.8111	28	28
165	slr7032	AP004311 (pSYSA)	30352..30669	318	BAD01934.1	0.451723	24.3543	26.9753	24.3543	12	12	53.9143	50.0326	53.9143	30	30
166	sll7033	AP004311 (pSYSA)	complement(30699..31040)	342	BAD01935.1	0.389416	18.871	20.9019	18.871	10	10	48.4598	44.9708	48.4598	29	29
167	sll7034	AP004311 (pSYSA)	complement(31037..31369)	333	BAD01936.1	1.67137	71.7099	79.4273	71.7099	37	37	42.9048	39.8157	42.9048	25	25
168	ssr7035	AP004311 (pSYSA)	31822..32097	276	BAD01937.1	1.69396	7.0151	7.77006	7.0151	3	3	4.14124	3.84308	4.14124	2	2
169	ssr7036	AP004311 (pSYSA)	32289..32483	195	BAD01938.1	3.82008	10210.4	11309.2	10210.4	3085	3085	2672.82	2480.38	2672.82	912	912
170	slr7037	AP004311 (pSYSA)	32647..35523	2877	BAD01939.1	0.582868	7.17847	7.95101	7.17847	32	32	12.3158	11.4291	12.3158	62	62
171	ssl7038	AP004311 (pSYSA)	complement(35891..36178)	288	BAD01940.1	0.84698	33.614	37.2315	33.614	15	15	39.6869	36.8295	39.6869	20	20
172	ssl7039	AP004311 (pSYSA)	complement(36189..36479)	291	BAD01941.1	0.738393	37.7031	41.7607	37.7031	17	17	51.0611	47.3848	51.0611	26	26
173	ssr7040	AP004311 (pSYSA)	36597..36848	252	BAD01942.1	1.20459	40.9771	45.387	40.9771	16	16	34.0174	31.5682	34.0174	15	15
174	slr7041	AP004311 (pSYSA)	36839..37201	363	BAD01943.1	0.865801	40.8924	45.2932	40.8924	23	23	47.2307	43.8302	47.2307	30	30
175	ssl7042	AP004311 (pSYSA)	complement(37267..37521)	255	BAD01944.1	1.93595	30.3712	33.6398	30.3712	12	12	15.688	14.5585	15.688	7	7
176	sll7043	AP004311 (pSYSA)	complement(37554..38138)	585	BAD01945.1	0.692155	20.9614	23.2172	20.9614	19	19	30.2842	28.1038	30.2842	31	31
177	sll7044	AP004311 (pSYSA)	complement(38131..38712)	582	BAD01946.1	0.655276	52.119	57.7281	52.119	47	47	79.5375	73.8109	79.5375	81	81
178	ssl7045	AP004311 (pSYSA)	complement(40013..40234)	222	BAD01947.1	0.821314	23.2573	25.7602	23.2573	8	8	28.3172	26.2784	28.3172	11	11
179	ssl7046	AP004311 (pSYSA)	complement(40245..40514)	270	BAD01948.1	0.821314	19.1226	21.1806	19.1226	8	8	23.283	21.6067	23.283	11	11
180	sll7047	AP004311 (pSYSA)	complement(40637..41368)	732	BAD01949.1	1.22455	79.3511	87.8908	79.3511	90	90	64.8003	60.1348	64.8003	83	83
181	ssl7048	AP004311 (pSYSA)	complement(41419..41640)	222	BAD01950.1	2.44683	37.7931	41.8603	37.7931	13	13	15.4457	14.3337	15.4457	6	6
182	slr7049	AP004311 (pSYSA)	41845..42492	648	BAD01951.1	1.45197	17.9275	19.8568	17.9275	18	18	12.347	11.4581	12.347	14	14
183	sll7050	AP004311 (pSYSA)	complement(43053..43646)	594	BAD01952.1	1.27047	9.77862	10.831	9.77862	9	9	7.69686	7.1427	7.69686	8	8
184	ssl7051	AP004311 (pSYSA)	complement(43751..44017)	267	BAD01953.1	1.12931	4.83437	5.35465	4.83437	2	2	4.28084	3.97262	4.28084	2	2
185	slr7052	AP004311 (pSYSA)	43997..44320	324	BAD01954.1	1.58103	13.9436	15.4442	13.9436	7	7	8.81931	8.18434	8.81931	5	5
186	ssl7053	AP004311 (pSYSA)	complement(44777..45019)	243	BAD01955.1	3.38792	23.9033	26.4758	23.9033	9	9	7.05545	6.54747	7.05545	3	3
187	slr7054	AP004311 (pSYSA)	45058..45630	573	BAD01956.1	0.771234	31.5373	34.9314	31.5373	28	28	40.8921	37.9479	40.8921	41	41
188	sll7055	AP004311 (pSYSA)	complement(45712..46254)	543	BAD01957.1	0.376435	3.56569	3.94942	3.56569	3	3	9.47224	8.79025	9.47224	9	9
189	sll7056	AP004311 (pSYSA)	complement(46666..47043)	378	BAD01958.1	0.451723	3.41476	3.78225	3.41476	2	2	7.55941	7.01515	7.55941	5	5
190	slr7057	AP004311 (pSYSA)	47529..48242	714	BAD01959.1	1.49782	113.892	126.149	113.892	126	126	76.0388	70.5641	76.0388	95	95
191	slr7058	AP004311 (pSYSA)	48431..48733	303	BAD01960.1	2.11745	63.8999	70.7768	63.8999	30	30	30.1778	28.005	30.1778	16	16
192	slr7059	AP004311 (pSYSA)	48790..49434	645	BAD01961.1	1.28741	57.0344	63.1724	57.0344	57	57	44.3017	41.112	44.3017	50	50
193	slr7060	AP004311 (pSYSA)	49431..51197	1767	BAD01962.1	1.19035	28.4892	31.5551	28.4892	78	78	23.9334	22.2103	23.9334	74	74
194	slr7061	AP004311 (pSYSA)	51537..52805	1269	BAD01963.1	0.634563	30.0063	33.2355	30.0063	59	59	47.2865	43.882	47.2865	105	105
195	sll7062	AP004311 (pSYSA)	complement(52881..53996)	1116	BAD01964.1	0.602297	46.2644	51.2434	46.2644	80	80	76.8134	71.2829	76.8134	150	150
196	sll7063	AP004311 (pSYSA)	complement(54005..56392)	2388	BAD01965.1	1.02271	95.9435	106.269	95.9435	355	355	93.8127	87.0583	93.8127	392	392
197	sll7064	AP004311 (pSYSA)	complement(56394..56975)	582	BAD01966.1	1.23044	80.9509	89.6627	80.9509	73	73	65.7903	61.0535	65.7903	67	67
198	sll7065	AP004311 (pSYSA)	complement(56954..58522)	1569	BAD01967.1	1.23969	60.0553	66.5184	60.0553	146	146	48.4438	44.956	48.4438	133	133
199	sll7066	AP004311 (pSYSA)	complement(58527..60902)	2376	BAD01968.1	1.21036	60.8448	67.3928	60.8448	224	224	50.2701	46.6507	50.2701	209	209
200	sll7067	AP004311 (pSYSA)	complement(60905..62581)	1677	BAD01969.1	1.1897	75.8149	83.9741	75.8149	197	197	63.7263	59.1381	63.7263	187	187
201	slr7068	AP004311 (pSYSA)	62908..64011	1104	BAD01970.1	0.951844	34.4909	38.2028	34.4909	59	59	36.2359	33.627	36.2359	70	70
202	sll7069	AP004311 (pSYSA)	complement(64005..64319)	315	BAD01971.1	1.09288	61.4656	68.0805	61.4656	30	30	56.242	52.1927	56.242	31	31
203	sll7070	AP004311 (pSYSA)	complement(64316..64690)	375	BAD01972.1	0.631646	56.7942	62.9064	56.7942	33	33	89.9147	83.441	89.9147	59	59
204	slr7071	AP004311 (pSYSA)	64822..65832	1011	BAD01973.1	0.952852	17.2359	19.0908	17.2359	27	27	18.0888	16.7864	18.0888	32	32
205	ssr7072	AP004311 (pSYSA)	65842..66123	282	BAD01974.1	2.96443	48.0609	53.2332	48.0609	21	21	16.2125	15.0453	16.2125	8	8
206	slr7073	AP004311 (pSYSA)	66223..66567	345	BAD01975.1	1.2261	213.259	236.21	213.259	114	114	173.932	161.409	173.932	105	105
207	ssl7074	AP004311 (pSYSA)	complement(66610..66906)	297	BAD01976.1	1.5347	115.17	127.565	115.17	53	53	75.0444	69.6413	75.0444	39	39
208	sll7075	AP004311 (pSYSA)	complement(66936..67976)	1041	BAD01977.1	1.23197	37.1982	41.2015	37.1982	60	60	30.1941	28.0202	30.1941	55	55
209	slr7076	AP004311 (pSYSA)	69379..69768	390	BAD01978.1	0.564653	1.65484	1.83294	1.65484	1	1	2.93073	2.71972	2.93073	2	2
210	sll7077	AP004311 (pSYSA)	complement(72878..73459)	582	BAD01979.1	0.694958	8.87133	9.82605	8.87133	8	8	12.7653	11.8462	12.7653	13	13
211	sll7078	AP004311 (pSYSA)	complement(73483..74349)	867	BAD01980.1	1.01043	12.6547	14.0166	12.6547	17	17	12.524	11.6223	12.524	19	19
212	ssr7079	AP004311 (pSYSA)	74804..75025	222	BAD01981.1	1.46146	63.9575	70.8405	63.9575	22	22	43.7629	40.612	43.7629	17	17
213	slr7080	AP004311 (pSYSA)	75157..76089	933	BAD01982.1	0.912727	40.8124	45.2046	40.8124	59	59	44.7148	41.4954	44.7148	73	73
214	slr7081	AP004311 (pSYSA)	76204..77592	1389	BAD01983.1	2.61524	40.8886	45.289	40.8886	88	88	15.6348	14.5091	15.6348	38	38
215	slr7082	AP004311 (pSYSA)	77632..78591	960	BAD01984.1	2.08487	16.1347	17.8711	16.1347	24	24	7.73895	7.18176	7.73895	13	13
216	slr7083	AP004311 (pSYSA)	78642..79775	1134	BAD01985.1	0.376435	2.84563	3.15188	2.84563	5	5	7.55941	7.01515	7.55941	15	15
217	ssr7084	AP004311 (pSYSA)	79821..80048	228	BAD01986.1	0.752871	22.6452	25.0823	22.6452	8	8	30.0785	27.9129	30.0785	12	12
218	sll7085	AP004311 (pSYSA)	complement(80203..81933)	1731	BAD01987.1	1.22017	35.0471	38.8189	35.0471	94	94	28.7231	26.6551	28.7231	87	87
219	sll7086	AP004311 (pSYSA)	complement(82196..82591)	396	BAD01988.1	1.47978	61.9313	68.5963	61.9313	38	38	41.8517	38.8384	41.8517	29	29
220	sll7087	AP004311 (pSYSA)	complement(82630..83436)	807	BAD01989.1	1.75911	129.558	143.501	129.558	162	162	73.6495	68.3468	73.6495	104	104
221	slr7088	AP004311 (pSYSA)	83501..83881	381	BAD01990.1	2.07477	133.821	148.223	133.821	79	79	64.4991	59.8552	64.4991	43	43
222	sll7089	AP004311 (pSYSA)	complement(83905..85017)	1113	BAD01991.1	3.27863	104.376	115.608	104.376	180	180	31.8351	29.543	31.8351	62	62
223	sll7090	AP004311 (pSYSA)	complement(85199..88138)	2940	BAD01992.1	3.41958	142.249	157.558	142.249	648	648	41.5984	38.6034	41.5984	214	214
224	slr7091	AP004311 (pSYSA)	88262..88630	369	BAD01993.1	2.25861	90.9491	100.737	90.9491	52	52	40.2677	37.3685	40.2677	26	26
225	slr7092	AP004311 (pSYSA)	88627..89616	990	BAD01994.1	0.910731	16.2977	18.0517	16.2977	25	25	17.8952	16.6068	17.8952	31	31
226	ssr7093	AP004311 (pSYSA)	89620..89898	279	BAD01995.1	1.35517	13.8793	15.373	13.8793	6	6	10.2418	9.50439	10.2418	5	5
227	slr7094	AP004311 (pSYSA)	93265..93654	390	BAD01996.1	4.09374	191.962	212.621	191.962	116	116	46.8916	43.5155	46.8916	32	32
228	slr7095	AP004311 (pSYSA)	93673..94188	516	BAD01997.1	2.75268	48.7794	54.029	48.7794	39	39	17.7207	16.4448	17.7207	16	16
229	slr7096	AP004311 (pSYSA)	94198..94611	414	BAD01998.1	4.0655	56.1208	62.1605	56.1208	36	36	13.8041	12.8103	13.8041	10	10
230	slr7097	AP004311 (pSYSA)	94718..95344	627	BAD01999.1	7.90514	50.4371	55.8651	50.4371	49	49	6.38029	5.92092	6.38029	7	7
231	slr7098	AP004311 (pSYSA)	95369..96241	873	BAD02000.1	3.63888	21.439	23.7463	21.439	29	29	5.89167	5.46748	5.89167	9	9
232	slr7099	AP004311 (pSYSA)	96348..96938	591	BAD02001.1	3.24676	25.1167	27.8197	25.1167	23	23	7.73593	7.17895	7.73593	8	8
233	slr7100	AP004311 (pSYSA)	97173..98522	1350	BAD02002.1	2.84148	37.2891	41.3022	37.2891	78	78	13.1231	12.1783	13.1231	31	31
234	slr7101	AP004311 (pSYSA)	98473..99015	543	BAD02003.1	1.10035	45.1653	50.026	45.1653	38	38	41.0464	38.0911	41.0464	39	39
235	slr7102	AP004311 (pSYSA)	99125..100141	1017	BAD02004.1	1.50574	17.7688	19.6811	17.7688	28	28	11.8007	10.9511	11.8007	21	21
236	sll7103	AP004311 (pSYSA)	complement(100246..100632)	387	BAD02005.1	1.80689	13.3414	14.7772	13.3414	8	8	7.38361	6.852	7.38361	5	5
237	slr7104	AP004311 (pSYSA)	100781..101140	360	BAD02006.1	#DIV/0!	0	0	0	0	0	0	0	0	0	0
238	slr7105	AP004311 (pSYSA)	101134..101628	495	BAD02007.1	#DIV/0!	0	0	0	0	0	0	0	0	0	0
239	sll8049	AP004312 (pSYSG)	complement(join(43288..44343,1..1914))	2970	BAD02057.1	0.893811	36.2896	40.195	36.2896	167	167	40.6009	37.6777	40.6009	211	211
240	sll8001	AP004312 (pSYSG)	complement(1920..2966)	1047	BAD02009.1	0.607674	69.6552	77.1514	69.6552	113	113	114.626	106.373	114.626	210	210
241	sll8002	AP004312 (pSYSG)	complement(2983..3621)	639	BAD02010.1	0.681478	35.3499	39.1543	35.3499	35	35	51.8725	48.1377	51.8725	58	58
242	ssl8003	AP004312 (pSYSG)	complement(3660..3839)	180	BAD02011.1	0.594372	35.8549	39.7136	35.8549	10	10	60.3241	55.9809	60.3241	19	19
243	sll8004	AP004312 (pSYSG)	complement(3836..4393)	558	BAD02012.1	1.12931	34.6983	38.4326	34.6983	30	30	30.7254	28.5132	30.7254	30	30
244	ssl8005	AP004312 (pSYSG)	complement(4365..4655)	291	BAD02013.1	0.97531	42.1388	46.6738	42.1388	19	19	43.2056	40.0948	43.2056	22	22
245	sll8006	AP004312 (pSYSG)	complement(4652..6046)	1395	BAD02014.1	1.08308	75.8737	84.0392	75.8737	164	164	70.0538	65.01	70.0538	171	171
246	sll8007	AP004312 (pSYSG)	complement(6043..6393)	351	BAD02015.1	1.11017	106.645	118.123	106.645	58	58	96.0627	89.1463	96.0627	59	59
247	ssl8008	AP004312 (pSYSG)	complement(6377..6601)	225	BAD02016.1	1.12931	152.025	168.386	152.025	53	53	134.618	124.926	134.618	53	53
248	sll8009	AP004312 (pSYSG)	complement(6652..8151)	1500	BAD02017.1	0.99379	9.46571	10.4844	9.46571	22	22	9.52486	8.83909	9.52486	25	25
249	ssl8010	AP004312 (pSYSG)	complement(8440..8619)	180	BAD02018.1	0.494071	50.1969	55.5991	50.1969	14	14	101.599	94.2836	101.599	32	32
250	sll8011	AP004312 (pSYSG)	complement(8821..9195)	375	BAD02019.1	0.52701	24.0945	26.6876	24.0945	14	14	45.7193	42.4276	45.7193	30	30
251	sll8012	AP004312 (pSYSG)	complement(9205..9621)	417	BAD02020.1	0.737186	72.7417	80.5701	72.7417	47	47	98.6748	91.5704	98.6748	72	72
252	ssr8013	AP004312 (pSYSG)	9713..9940	228	BAD02021.1	0.967977	67.9357	75.2469	67.9357	24	24	70.1832	65.1301	70.1832	28	28
253	slr8014	AP004312 (pSYSG)	9948..10373	426	BAD02022.1	0.725983	27.27	30.2047	27.27	18	18	37.5628	34.8584	37.5628	28	28
254	slr8015	AP004312 (pSYSG)	10395..10994	600	BAD02023.1	0.70017	33.3451	36.9337	33.3451	31	31	47.6243	44.1954	47.6243	50	50
255	slr8016	AP004312 (pSYSG)	10998..11867	870	BAD02024.1	0.341418	9.64374	10.6816	9.64374	13	13	28.2461	26.2125	28.2461	43	43
256	sll8017	AP004312 (pSYSG)	complement(12618..13151)	534	BAD02025.1	1.25139	49.5523	54.8851	49.5523	41	41	39.5977	36.7468	39.5977	37	37
257	sll8018	AP004312 (pSYSG)	complement(13695..15287)	1593	BAD02026.1	0.554197	21.4725	23.7833	21.4725	53	53	38.7452	35.9556	38.7452	108	108
258	sll8019	AP004312 (pSYSG)	complement(15590..17317)	1728	BAD02027.1	0.752871	18.6745	20.6842	18.6745	50	50	24.8043	23.0185	24.8043	75	75
259	sll8020	AP004312 (pSYSG)	complement(17687..18409)	723	BAD02028.1	1.27988	15.1751	16.8083	15.1751	17	17	11.8567	11.003	11.8567	15	15
260	slr8021	AP004312 (pSYSG)	18529..19311	783	BAD02029.1	1.76454	20.6063	22.8239	20.6063	25	25	11.678	10.8372	11.678	16	16
261	slr8022	AP004312 (pSYSG)	19356..19691	336	BAD02030.1	2.54094	17.2872	19.1476	17.2872	9	9	6.80347	6.31363	6.80347	4	4
262	slr8023	AP004312 (pSYSG)	19938..21278	1341	BAD02031.1	0.974303	21.1761	23.455	21.1761	44	44	21.7346	20.1697	21.7346	51	51
263	ssl8024	AP004312 (pSYSG)	complement(21321..21512)	192	BAD02032.1	1.12931	3.3614	3.72315	3.3614	1	1	2.97652	2.76221	2.97652	1	1
264	sll8025	AP004312 (pSYSG)	complement(21810..22325)	516	BAD02033.1	0.790514	8.75528	9.69752	8.75528	7	7	11.0754	10.278	11.0754	10	10
265	slr8026	AP004312 (pSYSG)	22461..22985	525	BAD02034.1	0.657728	65.1536	72.1654	65.1536	53	53	99.0585	91.9265	99.0585	91	91
266	sll8027	AP004312 (pSYSG)	complement(23434..23859)	426	BAD02035.1	0.982005	30.3	33.5608	30.3	20	20	30.8552	28.6337	30.8552	23	23
267	ssl8028	AP004312 (pSYSG)	complement(23856..24077)	222	BAD02036.1	0.441902	26.1644	28.9802	26.1644	9	9	59.2086	54.9457	59.2086	23	23
268	slr8029	AP004312 (pSYSG)	24295..24861	567	BAD02037.1	0.923978	20.4885	22.6935	20.4885	18	18	22.1743	20.5778	22.1743	22	22
269	slr8030	AP004312 (pSYSG)	25147..27345	2199	BAD02038.1	0.826427	56.057	62.0898	56.057	191	191	67.8305	62.9468	67.8305	261	261
270	ndhK2	AP004312 (pSYSG)	complement(27353..28012)	660	BAD02039.1	0.613052	18.5794	20.5789	18.5794	19	19	30.3064	28.1244	30.3064	35	35
271	sll8032	AP004312 (pSYSG)	complement(28120..28461)	342	BAD02040.1	9.03445	15.0968	16.7215	15.0968	8	8	1.67103	1.55072	1.67103	1	1
272	sll8033	AP004312 (pSYSG)	complement(28521..28919)	399	BAD02041.1	1.22342	21.0277	23.2907	21.0277	13	13	17.1877	15.9502	17.1877	12	12
273	sll8034	AP004312 (pSYSG)	complement(29006..30040)	1035	BAD02042.1	1.95062	11.8477	13.1228	11.8477	19	19	6.07382	5.63652	6.07382	11	11
274	sll8035	AP004312 (pSYSG)	complement(30084..30587)	504	BAD02043.1	2.63505	8.96374	9.92841	8.96374	7	7	3.40174	3.15682	3.40174	3	3
275	slr8036	AP004312 (pSYSG)	30678..31376	699	BAD02044.1	1.58994	98.7935	109.426	98.7935	107	107	62.1364	57.6627	62.1364	76	76
276	slr8037	AP004312 (pSYSG)	31348..32598	1251	BAD02045.1	0.787543	27.3426	30.2852	27.3426	53	53	34.7189	32.2192	34.7189	76	76
277	slr8038	AP004312 (pSYSG)	32698..36411	3714	BAD02046.1	1.10196	70.0301	77.5667	70.0301	403	403	63.5504	58.9748	63.5504	413	413
278	ssl8039	AP004312 (pSYSG)	complement(36860..37141)	282	BAD02047.1	0.834705	38.9064	43.0935	38.9064	17	17	46.611	43.2551	46.611	23	23
279	sll8040	AP004312 (pSYSG)	complement(37299..38048)	750	BAD02048.1	0.250957	3.44207	3.81251	3.44207	4	4	13.7158	12.7283	13.7158	18	18
280	ssl8041	AP004312 (pSYSG)	complement(38396..38599)	204	BAD02049.1	0	0	0	0	0	0	5.60286	5.19946	5.60286	2	2
281	sll8042	AP004312 (pSYSG)	complement(38568..39062)	495	BAD02050.1	#DIV/0!	0	0	0	0	0	0	0	0	0	0
282	sll8043	AP004312 (pSYSG)	complement(39056..39415)	360	BAD02051.1	#DIV/0!	8.96374	9.92841	8.96374	0	5	0	0	0	0	0
283	slr8044	AP004312 (pSYSG)	39491..40969	1479	BAD02052.1	0.492262	7.41826	8.21661	7.41826	17	17	15.0698	13.9848	15.0698	39	39
284	slr8045	AP004312 (pSYSG)	41056..41415	360	BAD02053.1	0.173739	3.58549	3.97136	3.58549	0	2	20.6372	19.1514	20.6372	1	13
285	slr8046	AP004312 (pSYSG)	41409..41903	495	BAD02054.1	0	0	0	0	0	0	6.92717	6.42843	6.92717	6	6
286	ssr8047	AP004312 (pSYSG)	41994..42194	201	BAD02055.1	0.282327	3.21089	3.55645	3.21089	1	1	11.373	10.5541	11.373	4	4
287	sll8048	AP004312 (pSYSG)	complement(42203..42913)	711	BAD02056.1	0.451723	21.7853	24.1298	21.7853	24	24	48.2271	44.7549	48.2271	60	60
288	slr6110	AP006585 (pSYSX)	join(105009..106004,1..255)	1251	BAD02167.1	1.35187	84.6074	93.7128	84.6074	164	164	62.5854	58.0794	62.5854	137	137
289	slr6001	AP006585 (pSYSX)	465..3053	2589	BAD02058.1	0.762882	31.6587	35.0658	31.6587	127	127	41.4988	38.511	41.4988	188	188
290	ssr6002	AP006585 (pSYSX)	3505..3753	249	BAD02059.1	0.141163	2.59192	2.87087	2.59192	1	1	18.3612	17.0392	18.3612	6	8
291	ssr6003	AP006585 (pSYSX)	3853..4080	228	BAD02060.1	1.12931	14.1533	15.6764	14.1533	4	5	12.5327	11.6304	12.5327	3	5
292	slr6004	AP006585 (pSYSX)	4050..4406	357	BAD02061.1	1.12931	1.80781	2.00237	1.80781	0	1	1.60082	1.48556	1.60082	1	1
293	slr6005	AP006585 (pSYSX)	4463..5251	789	BAD02062.1	4.51723	13.0877	14.4962	13.0877	0	16	2.8973	2.6887	2.8973	0	4
294	slr6006	AP006585 (pSYSX)	5251..6279	1029	BAD02063.1	0.887312	6.8992	7.64169	6.8992	0	11	7.7754	7.21558	7.7754	0	14
295	slr6007	AP006585 (pSYSX)	6397..7470	1074	BAD02064.1	5.64653	6.00921	6.65592	6.00921	0	10	1.06423	0.987607	1.06423	0	2
296	slr6008	AP006585 (pSYSX)	7565..8596	1032	BAD02065.1	0.451723	6.25377	6.9268	6.25377	0	10	13.8443	12.8475	13.8443	0	25
297	slr6009	AP006585 (pSYSX)	8655..9449	795	BAD02066.1	1.45197	7.30629	8.09259	7.30629	0	9	5.032	4.66971	5.032	0	7
298	sll6010	AP006585 (pSYSX)	complement(9520..10185)	666	BAD02067.1	1.09288	29.0716	32.2002	29.0716	0	30	26.601	24.6857	26.601	0	31
299	slr6011	AP006585 (pSYSX)	10368..10895	528	BAD02068.1	0.42349	3.66698	4.06162	3.66698	0	3	8.65896	8.03553	8.65896	0	8
300	slr6012	AP006585 (pSYSX)	11315..13507	2193	BAD02069.1	3.06401	103.003	114.088	103.003	0	350	33.6172	31.1968	33.6172	0	129
301	slr6013	AP006585 (pSYSX)	13483..15039	1557	BAD02070.1	2.4034	34.4042	38.1067	34.4042	0	83	14.3148	13.2842	14.3148	0	39
302	slr6014	AP006585 (pSYSX)	15036..16439	1404	BAD02071.1	1.3286	18.3872	20.366	18.3872	0	40	13.8395	12.8431	13.8395	0	34
303	slr6015	AP006585 (pSYSX)	16436..18091	1656	BAD02072.1	0.55732	14.8097	16.4035	14.8097	0	38	26.573	24.6598	26.573	0	77
304	slr6016	AP006585 (pSYSX)	18098..20500	2403	BAD02073.1	0.683161	13.1602	14.5765	13.1602	0	49	19.2638	17.8768	19.2638	0	81
305	sll6017	AP006585 (pSYSX)	complement(20559..21329)	771	BAD02074.1	0.469096	22.6012	25.0335	22.6012	0	27	48.1802	44.7113	48.1802	0	65
306	ssl6018	AP006585 (pSYSX)	complement(21554..21769)	216	BAD02075.1	0.376435	2.98791	3.30947	2.98791	0	1	7.93738	7.3659	7.93738	0	3
307	ssr6019	AP006585 (pSYSX)	21838..22035	198	BAD02076.1	3.61378	52.1527	57.7653	52.1527	0	16	14.4316	13.3926	14.4316	0	5
308	ssr6020	AP006585 (pSYSX)	22192..22410	219	BAD02077.1	#DIV/0!	2.94698	3.26413	2.94698	0	1	0	0	0	0	0
309	slr6021	AP006585 (pSYSX)	22487..22951	465	BAD02078.1	0.903445	5.55173	6.14921	5.55173	0	4	6.14507	5.70264	6.14507	0	5
310	slr6022	AP006585 (pSYSX)	23048..23833	786	BAD02079.1	1.25478	8.21106	9.09473	8.21106	0	10	6.5438	6.07265	6.5438	0	9
311	ssl6023	AP006585 (pSYSX)	complement(23898..24110)	213	BAD02080.1	0.594372	30.3	33.5608	30.3	0	10	50.9781	47.3078	50.9781	0	19
312	ssr6024	AP006585 (pSYSX)	24263..24442	180	BAD02081.1	#DIV/0!	0	0	0	0	0	0	0	0	0	0
313	slr6025	AP006585 (pSYSX)	24638..25147	510	BAD02082.1	#DIV/0!	0	0	0	0	0	0	0	0	0	0
314	ssr6026	AP006585 (pSYSX)	25216..25473	258	BAD02083.1	#DIV/0!	0	0	0	0	0	0	0	0	0	0
315	ssr6027	AP006585 (pSYSX)	25538..25729	192	BAD02084.1	1.12931	3.3614	3.72315	3.3614	0	1	2.97652	2.76221	2.97652	0	1
316	slr6028	AP006585 (pSYSX)	26096..26653	558	BAD02085.1	0.225861	1.15661	1.28109	1.15661	0	1	5.12089	4.7522	5.12089	0	5
317	slr6029	AP006585 (pSYSX)	26745..27242	498	BAD02086.1	5.5336	63.5021	70.3362	63.5021	0	49	11.4757	10.6495	11.4757	0	10
318	ssr6030	AP006585 (pSYSX)	27578..27796	219	BAD02087.1	1.04864	114.932	127.301	114.932	32	39	109.601	101.71	109.601	33	42
319	slr6031	AP006585 (pSYSX)	27957..31322	3366	BAD02088.1	0.603328	7.47777	8.28252	7.47777	39	39	12.3942	11.5018	12.3942	73	73
320	ssr6032	AP006585 (pSYSX)	31354..31572	219	BAD02089.1	0	0	0	0	0	0	2.60955	2.42167	2.60955	1	1
321	slr6033	AP006585 (pSYSX)	31373..31801	429	BAD02090.1	1.72085	48.1409	53.3218	48.1409	28	32	27.9751	25.9609	27.9751	15	21
322	slr6034	AP006585 (pSYSX)	32129..32545	417	BAD02091.1	0.376435	9.28617	10.2855	9.28617	3	6	24.6687	22.8926	24.6687	12	18
323	ssl6035	AP006585 (pSYSX)	complement(32660..32893)	234	BAD02092.1	0.307993	16.5484	18.3294	16.5484	6	6	53.73	49.8615	53.73	22	22
324	sll6036	AP006585 (pSYSX)	complement(32890..33495)	606	BAD02093.1	0.594372	31.95	35.3884	31.95	20	30	53.7542	49.8839	53.7542	40	57
325	slr6037	AP006585 (pSYSX)	33889..34311	423	BAD02094.1	0.286303	27.4634	30.419	27.4634	4	18	95.9241	89.0177	95.9241	39	71
326	slr6038	AP006585 (pSYSX)	34366..34668	303	BAD02095.1	0.542067	25.56	28.3107	25.56	12	12	47.1528	43.7578	47.1528	22	25
327	slr6039	AP006585 (pSYSX)	34784..35374	591	BAD02096.1	0.254094	58.9696	65.3158	58.9696	20	54	232.078	215.369	232.078	110	240
328	slr6040	AP006585 (pSYSX)	35381..36079	699	BAD02097.1	0.341764	21.236	23.5214	21.236	22	23	62.1364	57.6627	62.1364	72	76
329	slr6041	AP006585 (pSYSX)	36066..37418	1353	BAD02098.1	0.357614	9.06311	10.0385	9.06311	8	19	25.3433	23.5186	25.3433	35	60
330	slr6042	AP006585 (pSYSX)	37482..39119	1638	BAD02099.1	0.235272	9.85026	10.9103	9.85026	25	25	41.8675	38.8531	41.8675	120	120
331	slr6043	AP006585 (pSYSX)	39171..42311	3141	BAD02100.1	0.256661	6.16417	6.82756	6.16417	30	30	24.0168	22.2877	24.0168	132	132
332	slr6044	AP006585 (pSYSX)	42326..42805	480	BAD02101.1	0.0836523	5.37824	5.95705	5.37824	4	4	64.2928	59.6638	64.2928	54	54
333	slr6045	AP006585 (pSYSX)	43066..43374	309	BAD02102.1	0.451723	8.35455	9.25366	8.35455	4	4	18.4949	17.1633	18.4949	10	10
334	ssr6046	AP006585 (pSYSX)	43486..43689	204	BAD02103.1	4.11865	196.148	217.257	196.148	62	62	47.6243	44.1954	47.6243	17	17
335	slr6047	AP006585 (pSYSX)	43696..47151	3456	BAD02104.1	1.34688	24.2768	26.8894	24.2768	130	130	18.0245	16.7267	18.0245	109	109
336	ssr6048	AP006585 (pSYSX)	47182..47409	228	BAD02105.1	1.443	65.105	72.1116	65.105	23	23	45.1178	41.8694	45.1178	18	18
337	slr6049	AP006585 (pSYSX)	47396..47815	420	BAD02106.1	1.53586	52.2458	57.8684	52.2458	34	34	34.0174	31.5682	34.0174	25	25
338	slr6050	AP006585 (pSYSX)	47827..51129	3303	BAD02107.1	0.436146	10.9421	12.1197	10.9421	56	56	25.0882	23.2819	25.0882	145	145
339	slr6051	AP006585 (pSYSX)	51133..51513	381	BAD02108.1	0.338792	5.0818	5.6287	5.0818	3	3	14.9998	13.9198	14.9998	10	10
340	sll6052	AP006585 (pSYSX)	complement(51619..52014)	396	BAD02109.1	0.141163	3.25954	3.61033	3.25954	2	2	23.0906	21.4281	23.0906	16	16
341	sll6053	AP006585 (pSYSX)	complement(51986..53401)	1416	BAD02110.1	1.17113	12.7619	14.1354	12.7619	28	28	10.8971	10.1125	10.8971	27	27
342	sll6054	AP006585 (pSYSX)	complement(53398..53781)	384	BAD02111.1	1.22342	21.8491	24.2005	21.8491	13	13	17.8591	16.5733	17.8591	12	12
343	sll6055	AP006585 (pSYSX)	complement(53782..54240)	459	BAD02112.1	4.25151	89.9889	99.6734	89.9889	64	64	21.1664	19.6424	21.1664	17	17
344	slr6056	AP006585 (pSYSX)	54343..54702	360	BAD02113.1	0.282327	14.342	15.8855	14.342	8	8	50.7993	47.1418	50.7993	32	32
345	slr6057	AP006585 (pSYSX)	54708..55295	588	BAD02114.1	0.841444	41.7088	46.1975	41.7088	38	38	49.5681	45.9993	49.5681	51	51
346	slr6058	AP006585 (pSYSX)	55646..56236	591	BAD02115.1	0.0941089	1.09203	1.20955	1.09203	1	1	11.6039	10.7684	11.6039	12	12
347	sll6059	AP006585 (pSYSX)	complement(56265..56831)	567	BAD02116.1	1.12931	5.69126	6.30375	5.69126	5	5	5.03961	4.67676	5.03961	5	5
348	sll6060	AP006585 (pSYSX)	complement(57133..57666)	534	BAD02117.1	0.282327	4.83437	5.35465	4.83437	4	4	17.1233	15.8905	17.1233	16	16
349	ssl6061	AP006585 (pSYSX)	complement(57700..57906)	207	BAD02118.1	#DIV/0!	0	0	0	0	0	0	0	0	0	0
350	ssr6062	AP006585 (pSYSX)	58222..58470	249	BAD02119.1	0.376435	2.59192	2.87087	2.59192	1	1	6.88544	6.3897	6.88544	2	3
351	slr6063	AP006585 (pSYSX)	58570..59124	555	BAD02120.1	1.82426	24.4201	27.0482	24.4201	9	21	13.3863	12.4225	13.3863	8	13
352	slr6064	AP006585 (pSYSX)	59181..59969	789	BAD02121.1	3.38792	12.2698	13.5902	12.2698	0	15	3.62162	3.36087	3.62162	0	5
353	slr6065	AP006585 (pSYSX)	59969..60997	1029	BAD02122.1	5.42067	15.0528	16.6728	15.0528	0	24	2.77693	2.57699	2.77693	0	5
354	slr6066	AP006585 (pSYSX)	61115..62188	1074	BAD02123.1	1.58103	4.20645	4.65914	4.20645	0	7	2.66058	2.46902	2.66058	0	5
355	slr6067	AP006585 (pSYSX)	62283..63314	1032	BAD02124.1	0.752871	10.006	11.0829	10.006	0	16	13.2905	12.3336	13.2905	0	24
356	slr6068	AP006585 (pSYSX)	63373..64167	795	BAD02125.1	1.88218	4.05905	4.49588	4.05905	0	5	2.15657	2.0013	2.15657	0	3
357	sll6069	AP006585 (pSYSX)	complement(64238..64903)	666	BAD02126.1	1.36296	33.9168	37.567	33.9168	0	35	24.8848	23.0931	24.8848	0	29
358	slr6070	AP006585 (pSYSX)	65086..65613	528	BAD02127.1	0.282327	1.22233	1.35387	1.22233	0	1	4.32948	4.01777	4.32948	0	4
359	slr6071	AP006585 (pSYSX)	66033..68225	2193	BAD02128.1	2.73917	100.649	111.481	100.649	0	342	36.7443	34.0988	36.7443	0	141
360	slr6072	AP006585 (pSYSX)	68201..69757	1557	BAD02129.1	1.82426	26.114	28.9244	26.114	0	63	14.3148	13.2842	14.3148	0	39
361	slr6073	AP006585 (pSYSX)	69754..71157	1404	BAD02130.1	1.4197	20.2259	22.4026	20.2259	0	44	14.2466	13.2209	14.2466	0	35
362	slr6074	AP006585 (pSYSX)	71154..72809	1656	BAD02131.1	0.809691	14.8097	16.4035	14.8097	0	38	18.2905	16.9736	18.2905	0	53
363	slr6075	AP006585 (pSYSX)	72816..75218	2403	BAD02132.1	0.51116	11.5488	12.7917	11.5488	0	43	22.5933	20.9666	22.5933	0	95
364	sll6076	AP006585 (pSYSX)	complement(75277..76047)	771	BAD02133.1	0.604986	25.1124	27.815	25.1124	0	30	41.5091	38.5205	41.5091	0	56
365	ssl6077	AP006585 (pSYSX)	complement(76272..76487)	216	BAD02134.1	1.12931	17.9275	19.8568	17.9275	0	6	15.8748	14.7318	15.8748	0	6
366	ssr6078	AP006585 (pSYSX)	76556..76753	198	BAD02135.1	6.77584	39.1145	43.324	39.1145	0	12	5.77264	5.35702	5.77264	0	2
367	ssr6079	AP006585 (pSYSX)	76910..77128	219	BAD02136.1	0	0	0	0	0	0	2.60955	2.42167	2.60955	0	1
368	slr6080	AP006585 (pSYSX)	77205..77669	465	BAD02137.1	0.282327	2.77587	3.0746	2.77587	0	2	9.83211	9.12422	9.83211	0	8
369	slr6081	AP006585 (pSYSX)	77766..78551	786	BAD02138.1	0.752871	4.92663	5.45684	4.92663	0	6	6.5438	6.07265	6.5438	0	9
370	ssl6082	AP006585 (pSYSX)	complement(78616..78828)	213	BAD02139.1	0.978732	39.3899	43.6291	39.3899	0	13	40.2459	37.3482	40.2459	0	15
371	ssr6083	AP006585 (pSYSX)	78981..79160	180	BAD02140.1	#DIV/0!	0	0	0	0	0	0	0	0	0	0
372	slr6084	AP006585 (pSYSX)	79356..79865	510	BAD02141.1	1.12931	1.26547	1.40166	1.26547	0	1	1.12057	1.03989	1.12057	0	1
373	ssr6085	AP006585 (pSYSX)	79934..80191	258	BAD02142.1	#DIV/0!	10.006	11.0829	10.006	0	4	0	0	0	0	0
374	ssr6086	AP006585 (pSYSX)	80256..80447	192	BAD02143.1	#DIV/0!	0	0	0	0	0	0	0	0	0	0
375	slr6087	AP006585 (pSYSX)	80814..81371	558	BAD02144.1	0.410657	4.62644	5.12434	4.62644	0	4	11.266	10.4548	11.266	0	11
376	slr6088	AP006585 (pSYSX)	81463..81960	498	BAD02145.1	3.26244	67.39	74.6425	67.39	0	52	20.6563	19.1691	20.6563	0	18
377	ssr6089	AP006585 (pSYSX)	82296..82514	219	BAD02146.1	2.11745	132.614	146.886	132.614	35	45	62.6292	58.12	62.6292	19	24
378	slr6090	AP006585 (pSYSX)	82675..86385	3711	BAD02147.1	0.593504	12.5217	13.8693	12.5217	72	72	21.0979	19.5789	21.0979	136	137
379	slr6091	AP006585 (pSYSX)	86436..86870	435	BAD02148.1	0.434349	7.41826	8.21661	7.41826	5	5	17.0791	15.8494	17.0791	13	13
380	ssl6092	AP006585 (pSYSX)	complement(87011..87274)	264	BAD02149.1	0.434349	24.4466	27.0775	24.4466	10	10	56.2833	52.231	56.2833	26	26
381	sll6093	AP006585 (pSYSX)	complement(87258..87854)	597	BAD02150.1	0.443146	33.5127	37.1193	33.5127	31	31	75.6245	70.1797	75.6245	79	79
382	slr6094	AP006585 (pSYSX)	88094..88417	324	BAD02151.1	0.125478	1.99194	2.20631	1.99194	1	1	15.8748	14.7318	15.8748	9	9
383	slr6095	AP006585 (pSYSX)	88535..89968	1434	BAD02152.1	0.366261	5.40075	5.98197	5.40075	12	12	14.7456	13.6839	14.7456	37	37
384	slr6096	AP006585 (pSYSX)	89982..91103	1122	BAD02153.1	0	0	0	0	0	0	1.0187	0.945357	1.0187	2	2
385	slr6097	AP006585 (pSYSX)	91096..92280	1185	BAD02154.1	0.35723	16.8836	18.7006	16.8836	31	31	47.2626	43.8598	47.2626	98	98
386	sll6098	AP006585 (pSYSX)	complement(92267..93343)	1077	BAD02155.1	0.510508	19.7752	21.9033	19.7752	33	33	38.7362	35.9473	38.7362	73	73
387	ssr6099	AP006585 (pSYSX)	93525..93761	237	BAD02156.1	0.537765	27.2316	30.1623	27.2316	10	10	50.6385	46.9926	50.6385	21	21
388	slr6100	AP006585 (pSYSX)	93820..94140	321	BAD02157.1	1.32176	4073.39	4511.77	4073.39	2026	2026	3081.78	2859.9	3081.78	1731	1731
389	slr6101	AP006585 (pSYSX)	94281..94700	420	BAD02158.1	0.868697	46.0992	51.0604	46.0992	30	30	53.0671	49.2463	53.0671	39	39
390	slr6102	AP006585 (pSYSX)	94710..97901	3192	BAD02159.1	0.602297	17.7927	19.7075	17.7927	88	88	29.5414	27.4145	29.5414	165	165
391	slr6103	AP006585 (pSYSX)	97886..98596	711	BAD02160.1	0.201662	4.5386	5.02704	4.5386	5	5	22.506	20.8856	22.506	28	28
392	slr6104	AP006585 (pSYSX)	98943..99497	555	BAD02161.1	0.418262	11.6286	12.8801	11.6286	10	10	27.8023	25.8006	27.8023	27	27
393	slr6105	AP006585 (pSYSX)	99535..100551	1017	BAD02162.1	#DIV/0!	0	0	0	0	0	0	0	0	0	0
394	slr6106	AP006585 (pSYSX)	100603..101829	1227	BAD02163.1	0.205328	1.05198	1.16519	1.05198	2	2	5.1234	4.75452	5.1234	11	11
395	slr6107	AP006585 (pSYSX)	102151..102672	522	BAD02164.1	1.29064	9.89102	10.9555	9.89102	8	8	7.66368	7.11191	7.66368	7	7
396	slr6108	AP006585 (pSYSX)	102911..103720	810	BAD02165.1	0.209131	3.98388	4.41263	3.98388	5	5	19.0497	17.6782	19.0497	27	27
397	sll6109	AP006585 (pSYSX)	complement(103764..104327)	564	BAD02166.1	0.282327	6.86584	7.60474	6.86584	4	6	24.3188	22.5679	24.3188	22	24
398	sds	AP012276	join(3569805..3570004,1..772)	972	BAL30918.1	0.882676	45.1507	50.0098	45.1507	68	68	51.152	47.4692	51.152	87	87
399	slr0612	AP012276	937..1494	558	BAL27749.1	0.534935	10.4095	11.5298	10.4095	9	9	19.4594	18.0583	19.4594	19	19
400	slr0613	AP012276	1577..2098	522	BAL27750.1	0.806647	61.8189	68.4718	61.8189	50	50	76.6368	71.1191	76.6368	70	70
401	sll0558	AP012276	complement(2172..2873)	702	BAL27751.1	0.57511	50.5647	56.0064	50.5647	55	55	87.9218	81.5916	87.9218	108	108
402	sll1214	AP012276	complement(3192..4268)	1077	BAL27752.1	0.361518	619.621	686.305	619.621	1034	1034	1713.94	1590.54	1713.94	3230	3230
403	sll1213	AP012276	complement(4451..5389)	939	BAL27753.1	0.441298	87.289	96.683	87.289	127	127	197.801	183.559	197.801	325	325
404	rfbD_1	AP012276	complement(5534..6622)	1089	BAL27754.1	0.522998	133.937	148.352	133.937	226	226	256.095	237.657	256.095	488	488
405	psbA2	AP012276	7229..8311	1083	BAL27755.1	2.63458	66623.5	73793.4	66623.5	48528	111798	25288.1	23467.4	25288.1	22507	47922
406	speA_1	AP012276	8492..10471	1980	BAL27756.1	0.57739	44.3298	49.1005	44.3298	136	136	76.7761	71.2484	76.7761	266	266
407	ligA	AP012276	complement(10622..12631)	2010	BAL27757.1	0.358927	13.1647	14.5814	13.1647	41	41	36.6778	34.0371	36.6778	129	129
408	slr1315	AP012276	12755..13363	609	BAL27758.1	0.479955	36.0316	39.9093	36.0316	34	34	75.0728	69.6677	75.0728	80	80
409	fecC	AP012276	13498..14529	1032	BAL27759.1	0.0829694	11.2568	12.4682	11.2568	18	18	135.674	125.906	135.674	245	245
410	fecD	AP012276	14626..15675	1050	BAL27760.1	0.106288	9.8345	10.8929	9.8345	16	16	92.5272	85.8654	92.5272	170	170
411	fecE	AP012276	15937..16743	807	BAL27761.1	0.0277698	7.19765	7.97225	7.19765	9	9	259.189	240.528	259.189	366	366
412	fecB_1	AP012276	16740..17687	948	BAL27762.1	0.0734049	17.7005	19.6055	17.7005	26	26	241.136	223.774	241.136	400	400
413	iutA	AP012276	complement(17853..20408)	2556	BAL27763.1	0.140488	6.56499	7.27151	6.56499	26	26	46.7299	43.3655	46.7299	209	209
414	pchR_1	AP012276	complement(20615..21595)	981	BAL27764.1	0.0432684	6.57889	7.28691	6.57889	10	10	152.048	141.101	152.048	261	261
415	sll1204	AP012276	complement(21838..23121)	1284	BAL27765.1	0.0792496	2.01056	2.22693	2.01056	4	4	25.37	23.5434	25.37	57	57
416	sll1203	AP012276	complement(23139..24104)	966	BAL27766.1	0.0313696	1.33621	1.48001	1.33621	2	2	42.5956	39.5288	42.5956	72	72
417	sll1202	AP012276	complement(24101..25144)	1044	BAL27767.1	0.0194708	1.23638	1.36944	1.23638	2	2	63.4991	58.9272	63.4991	116	116
418	fhuA_1	AP012276	complement(25266..27857)	2592	BAL27768.1	0.0275441	2.24093	2.4821	2.24093	9	9	81.3582	75.5005	81.3582	369	369
419	pcrR	AP012276	complement(27990..29030)	1041	BAL27769.1	0.00699694	3.09985	3.43346	3.09985	5	5	443.03	411.132	443.03	807	807
420	sll1407	AP012276	complement(29098..29895)	798	BAL27770.1	0.00334609	1.61752	1.79159	1.61752	2	2	483.405	448.6	483.405	675	675
421	fhuA_2	AP012276	complement(29968..32454)	2487	BAL27771.1	0.0068092	5.1901	5.74866	5.1901	20	20	762.219	707.34	762.219	3317	3317
422	sll1405	AP012276	complement(32524..32952)	429	BAL27772.1	0.00924578	10.5308	11.6641	10.5308	7	7	1138.99	1056.98	1138.99	855	855
423	exbB_1	AP012276	complement(32912..33544)	633	BAL27773.1	0.0033596	7.137	7.90508	7.137	7	7	2124.36	1971.41	2124.36	2353	2353
424	slr1484	AP012276	33891..35489	1599	BAL27774.1	0.00814124	2.82534	3.1294	2.82534	7	7	347.041	322.054	347.041	971	971
425	slr1485	AP012276	35566..36615	1050	BAL27775.1	0.0126533	2.45862	2.72322	2.45862	4	4	194.307	180.317	194.307	357	357
426	slr1488	AP012276	36721..38538	1818	BAL27776.1	0.0109946	2.485	2.75243	2.485	7	7	226.019	209.746	226.019	719	719
427	pchR_2	AP012276	38644..39636	993	BAL27777.1	0.0173295	3.89963	4.31931	3.89963	6	6	225.028	208.827	225.028	391	391
428	fhuA_3	AP012276	39802..42363	2562	BAL27778.1	0.114423	5.79389	6.41743	5.79389	23	23	50.6357	46.99	50.6357	227	227
429	fecB_2	AP012276	42405..43397	993	BAL27779.1	0.300541	21.448	23.7562	21.448	33	33	71.3645	66.2264	71.3645	124	124
430	fecB_3	AP012276	43571..44506	936	BAL27780.1	0.383964	11.7218	12.9833	11.7218	17	17	30.5284	28.3304	30.5284	50	50
431	slr1493	AP012276	44442..44885	444	BAL27781.1	0	0	0	0	0	0	39.9014	37.0286	39.9014	31	31
432	slr1494	AP012276	44948..46789	1842	BAL27782.1	0.216736	6.65711	7.37354	6.65711	19	19	30.7153	28.5039	30.7153	99	99
433	sll1401	AP012276	complement(47007..48017)	1011	BAL27783.1	0.553999	16.5975	18.3838	16.5975	26	26	29.9595	27.8025	29.9595	53	53
434	sll1400	AP012276	complement(48067..48408)	342	BAL27784.1	0.255005	13.2097	14.6313	13.2097	7	7	51.8019	48.0722	51.8019	31	31
435	ssl2733	AP012276	complement(48405..48635)	231	BAL27785.1	0.662007	47.4962	52.6077	47.4962	17	17	71.7457	66.5801	71.7457	29	29
436	sll1399	AP012276	complement(48663..49868)	1206	BAL27786.1	0.549794	99.0025	109.657	99.0025	185	185	180.072	167.107	180.072	380	380
437	psbW	AP012276	complement(49893..50231)	339	BAL27787.1	0.433193	329.358	364.803	329.358	173	173	760.303	705.562	760.303	451	451
438	slr1495	AP012276	50246..51895	1650	BAL27788.1	0.376435	12.9078	14.2969	12.9078	33	33	34.2895	31.8207	34.2895	99	99
439	sll1397	AP012276	complement(52260..53108)	849	BAL27789.1	0	0	0	0	0	0	3.36567	3.12335	3.36567	3	5
440	sll1396	AP012276	complement(53453..54127)	675	BAL27790.1	0.440238	21.991	24.3577	21.991	23	23	49.9526	46.3561	49.9526	59	59
441	hypD	AP012276	54533..55657	1125	BAL27791.1	0.80276	33.8471	37.4897	33.8471	59	59	42.1634	39.1277	42.1634	83	83
442	rfbD_2	AP012276	complement(55669..56550)	882	BAL27792.1	0.749859	60.7339	67.27	60.7339	83	83	80.9937	75.1623	80.9937	125	125
443	msrA_1	AP012276	complement(56556..57224)	669	BAL27793.1	1.00856	136.988	151.731	136.988	142	142	135.825	126.046	135.825	159	159
444	glgA_1	AP012276	complement(57340..58815)	1476	BAL27794.1	0.812308	125.492	138.998	125.492	287	287	154.489	143.366	154.489	399	399
445	sll1392	AP012276	complement(59039..59650)	612	BAL27795.1	0.903445	16.8729	18.6888	16.8729	16	16	18.6762	17.3315	18.6762	20	20
446	slr1501	AP012276	59746..60423	678	BAL27796.1	1.99981	80.9116	89.6193	80.9116	85	85	40.4596	37.5466	40.4596	48	48
447	slr1113	AP012276	60524..61522	999	BAL27797.1	1.62417	82.6925	91.5918	82.6925	128	128	50.9137	47.248	50.9137	89	89
448	slr1114	AP012276	61834..63591	1758	BAL27798.1	2.85523	98.387	108.975	98.387	268	268	34.4585	31.9776	34.4585	106	106
449	slr1115	AP012276	63588..64361	774	BAL27799.1	1.24694	44.1933	48.9494	44.1933	53	53	35.4413	32.8896	35.4413	48	48
450	slr1116	AP012276	64393..64914	522	BAL27800.1	0.63994	42.0368	46.5608	42.0368	34	34	65.6887	60.9592	65.6887	60	60
451	slr1117	AP012276	64987..65748	762	BAL27801.1	0.610936	27.9499	30.9579	27.9499	33	33	45.7493	42.4554	45.7493	61	61
452	sll1064	AP012276	complement(65827..67533)	1707	BAL27802.1	0.898003	24.9535	27.639	24.9535	66	66	27.7878	25.7871	27.7878	83	83
453	rffM_1	AP012276	67606..68361	756	BAL27803.1	0.581764	29.0254	32.1491	29.0254	34	34	49.8921	46.3	49.8921	66	66
454	sll1063	AP012276	complement(68400..69059)	660	BAL27804.1	0.899262	42.0481	46.5733	42.0481	43	43	46.7584	43.3919	46.7584	54	54
455	slr1119	AP012276	69284..69985	702	BAL27805.1	0.415499	35.8549	39.7136	35.8549	39	39	86.2936	80.0806	86.2936	106	106
456	sll1062	AP012276	complement(70016..70393)	378	BAL27806.1	0.713246	20.4885	22.6935	20.4885	12	12	28.7258	26.6576	28.7258	19	19
457	sll1061	AP012276	complement(70420..70935)	516	BAL27807.1	0.298934	11.2568	12.4682	11.2568	9	9	37.6564	34.9452	37.6564	34	34
458	sll1060	AP012276	complement(70944..74042)	3099	BAL27808.1	1.35381	41.4432	45.9033	41.4432	199	199	30.6123	28.4083	30.6123	166	166
459	ssl2069	AP012276	complement(73978..74229)	252	BAL27809.1	2.09728	66.5878	73.7539	66.5878	26	26	31.7495	29.4636	31.7495	14	14
460	ssr1853	AP012276	74498..74785	288	BAL27810.1	0.687108	226.334	250.692	226.334	101	101	329.401	305.685	329.401	166	166
461	hofD	AP012276	74995..75804	810	BAL27811.1	1.0685	98.0035	108.551	98.0035	123	123	91.7209	85.1171	91.7209	130	130
462	adk_1	AP012276	complement(75955..76500)	546	BAL27812.1	0.629185	46.0992	51.0604	46.0992	39	39	73.2682	67.993	73.2682	70	70
463	dapB	AP012276	complement(76580..77407)	828	BAL27813.1	0.89269	64.6948	71.6572	64.6948	83	83	72.4718	67.2539	72.4718	105	105
464	trx	AP012276	complement(77494..77874)	381	BAL27814.1	1.03171	125.351	138.841	125.351	74	74	121.498	112.751	121.498	81	81
465	purL_1	AP012276	complement(78467..80800)	2334	BAL27815.1	0.570474	27.0986	30.0149	27.0986	98	98	47.5019	44.0818	47.5019	194	194
466	slr1122	AP012276	80938..81690	753	BAL27816.1	0.775685	58.2821	64.5544	58.2821	68	68	75.1363	69.7266	75.1363	99	99
467	sll1054	AP012276	complement(81696..82259)	564	BAL27817.1	1.79216	83.5344	92.5243	83.5344	73	73	46.611	43.2551	46.611	46	46
468	sll1053	AP012276	complement(82291..83853)	1563	BAL27818.1	2.33499	176.728	195.748	176.728	428	428	75.687	70.2376	75.687	207	207
469	gmk	AP012276	84122..84697	576	BAL27819.1	0.702001	25.7707	28.5442	25.7707	23	23	36.7104	34.0673	36.7104	37	37
470	gpmB	AP012276	84776..86107	1332	BAL27820.1	0.273048	49.9062	55.2771	49.9062	103	103	182.774	169.615	182.774	426	426
471	crtX	AP012276	86159..87418	1260	BAL27821.1	0.256131	11.2687	12.4814	11.2687	22	22	43.9958	40.8282	43.9958	97	97
472	sll1052	AP012276	complement(87536..87910)	375	BAL27822.1	0.352908	8.60519	9.53127	8.60519	5	5	24.3836	22.6281	24.3836	16	16
473	cpcF	AP012276	complement(88017..88661)	645	BAL27823.1	0.52701	14.0084	15.516	14.0084	14	14	26.581	24.6672	26.581	30	30
474	sll1049	AP012276	complement(88818..90512)	1695	BAL27824.1	0.907478	51.4027	56.9346	51.4027	135	135	56.6434	52.5652	56.6434	168	168
475	slr1127	AP012276	90620..91411	792	BAL27825.1	1.5611	536.194	593.899	536.194	658	658	343.472	318.743	343.472	476	476
476	slr1128	AP012276	91517..92482	966	BAL27826.1	1.38248	277.263	307.102	277.263	415	415	200.555	186.115	200.555	339	339
477	rne	AP012276	93128..95152	2025	BAL27827.1	1.15473	173.697	192.391	173.697	545	545	150.422	139.592	150.422	533	533
478	rhnB	AP012276	95236..95808	573	BAL27828.1	0.775014	39.4217	43.6642	39.4217	35	35	50.8657	47.2035	50.8657	51	51
479	mutT	AP012276	complement(95818..96228)	411	BAL27829.1	0.205328	6.28116	6.95713	6.28116	4	4	30.5908	28.3883	30.5908	22	22
480	pnp	AP012276	complement(96325..98481)	2157	BAL27830.1	0.952983	271.68	300.918	271.68	908	908	285.083	264.558	285.083	1076	1076
481	lepB_1	AP012276	complement(98609..99199)	591	BAL27831.1	1.30645	64.4297	71.3636	64.4297	59	59	49.3165	45.7658	49.3165	51	51
482	me	AP012276	99402..100793	1392	BAL27832.1	0.651321	57.4916	63.6788	57.4916	124	124	88.2692	81.9139	88.2692	215	215
483	cysM	AP012276	complement(100794..101771)	978	BAL27833.1	0.584923	66.6506	73.8235	66.6506	101	101	113.948	105.744	113.948	195	195
484	ipk	AP012276	complement(101884..102831)	948	BAL27834.1	0.49621	19.7429	21.8676	19.7429	29	29	39.7874	36.9228	39.7874	66	66
485	sll0710	AP012276	complement(102930..105110)	2181	BAL27835.1	0.261152	10.9488	12.1271	10.9488	37	37	41.9251	38.9066	41.9251	160	160
486	sll0709	AP012276	complement(105151..106539)	1389	BAL27836.1	0.474942	20.9089	23.1591	20.9089	45	45	44.0242	40.8545	44.0242	107	107
487	ksgA	AP012276	complement(107471..108325)	855	BAL27837.1	0.219587	5.28389	5.85254	5.28389	7	7	24.0628	22.3303	24.0628	36	36
488	slr0722	AP012276	108290..109201	912	BAL27838.1	0.649351	16.2763	18.0279	16.2763	23	23	25.0654	23.2608	25.0654	40	40
489	slr0723	AP012276	109222..110313	1092	BAL27839.1	0.852307	23.6406	26.1848	23.6406	40	40	27.7372	25.7402	27.7372	53	53
490	sohA	AP012276	110392..110724	333	BAL27840.1	0.615985	23.2573	25.7602	23.2573	12	12	37.7562	35.0378	37.7562	22	22
491	slr0725	AP012276	110808..111224	417	BAL27841.1	0.150574	3.09539	3.42852	3.09539	2	2	20.5573	19.0772	20.5573	15	15
492	slr0727	AP012276	111585..112559	975	BAL27842.1	0.311904	19.1962	21.2621	19.1962	29	29	61.5452	57.1141	61.5452	105	105
493	slr0728	AP012276	113025..114188	1164	BAL27843.1	0.533713	38.2576	42.3749	38.2576	69	69	71.6819	66.521	71.6819	146	146
494	slr0729	AP012276	114319..114624	306	BAL27844.1	1.49782	265.748	294.348	265.748	126	126	177.424	164.65	177.424	95	95
495	slr0730	AP012276	114874..115272	399	BAL27845.1	0.700949	58.2306	64.4973	58.2306	36	36	83.074	77.0928	83.074	58	58
496	slr0731	AP012276	115269..116477	1209	BAL27846.1	0.535375	68.329	75.6826	68.329	128	128	127.628	118.439	127.628	270	270
497	nifS_1	AP012276	complement(116518..117693)	1176	BAL27847.1	1.27858	108.114	119.749	108.114	197	197	84.5574	78.4694	84.5574	174	174
498	slr0732	AP012276	117869..118336	468	BAL27848.1	0.256661	6.89518	7.63724	6.89518	5	5	26.865	24.9308	26.865	22	22
499	sll0703	AP012276	complement(118333..119532)	1200	BAL27849.1	0.491795	14.5213	16.084	14.5213	27	27	29.5271	27.4012	29.5271	62	62
500	sll0702	AP012276	complement(119570..119962)	393	BAL27850.1	0.738393	27.9176	30.9221	27.9176	17	17	37.8086	35.0864	37.8086	26	26
501	ssl1328	AP012276	complement(120298..120537)	240	BAL27851.1	0.443656	29.5803	32.7638	29.5803	11	11	66.674	61.8736	66.674	28	28
502	xerC	AP012276	120719..121660	942	BAL27852.1	0.298552	15.7579	17.4538	15.7579	23	23	52.7811	48.9809	52.7811	87	87
503	ssl1326	AP012276	complement(121706..121990)	285	BAL27853.1	0.615985	13.5871	15.0494	13.5871	6	6	22.0576	20.4695	22.0576	11	11
504	slr0734	AP012276	122287..123405	1119	BAL27854.1	0.983589	15.5724	17.2483	15.5724	27	27	15.8322	14.6923	15.8322	31	31
505	sll0700	AP012276	complement(123501..123995)	495	BAL27855.1	1.50574	5.21527	5.77653	5.21527	4	4	3.46359	3.21421	3.46359	3	3
506	sll0699	AP012276	complement(123989..124348)	360	BAL27856.1	#DIV/0!	0	0	0	0	0	0	0	0	0	0
507	ycf26	AP012276	complement(124452..126443)	1992	BAL27857.1	0.776087	50.5425	55.9819	50.5425	156	156	65.1248	60.4359	65.1248	227	227
508	psaD	AP012276	126639..127064	426	BAL27858.1	0.467028	3689.02	4086.03	3689.02	2435	2435	7898.93	7330.22	7898.93	5888	5888
509	trpE_1	AP012276	127186..128712	1527	BAL27859.1	0.523773	86.6436	95.9681	86.6436	205	205	165.422	153.512	165.422	442	442
510	crtE	AP012276	128802..129710	909	BAL27860.1	0.622373	88.0399	97.5147	88.0399	124	124	141.458	131.274	141.458	225	225
511	slr0740	AP012276	129791..130186	396	BAL27861.1	0.504866	61.9313	68.5963	61.9313	38	38	122.669	113.837	122.669	85	85
512	sll0696	AP012276	complement(130167..131039)	873	BAL27862.1	0.4325	13.307	14.7391	13.307	18	18	30.7676	28.5524	30.7676	47	47
513	phoU	AP012276	131116..131790	675	BAL27863.1	0.658762	20.0788	22.2396	20.0788	21	21	30.4796	28.2851	30.4796	36	36
514	slr0742	AP012276	131877..132407	531	BAL27864.1	0.543345	61.9865	68.6575	61.9865	51	51	114.083	105.869	114.083	106	106
515	nusA	AP012276	132483..133859	1377	BAL27865.1	0.635235	42.1823	46.7219	42.1823	90	90	66.4043	61.6233	66.4043	160	160
516	ssr1238	AP012276	133923..134177	255	BAL27866.1	1.11129	468.223	518.613	468.223	185	185	421.335	391	421.335	188	188
517	infB	AP012276	134437..137442	3006	BAL27867.1	1.30031	235.097	260.398	235.097	1095	1095	180.801	167.784	180.801	951	951
518	slr0236	AP012276	137444..138112	669	BAL27868.1	0.702159	115.765	128.223	115.765	120	120	164.87	152.999	164.87	193	193
519	glgX_1	AP012276	138295..140535	2241	BAL27869.1	0.588512	42.6227	47.2098	42.6227	148	148	72.4246	67.2102	72.4246	284	284
520	slr0238	AP012276	140585..141007	423	BAL27870.1	0.312045	32.0406	35.4888	32.0406	21	21	102.679	95.2866	102.679	76	76
521	ssl0426	AP012276	complement(141123..141416)	294	BAL27871.1	0.821314	70.2464	77.8063	70.2464	32	32	85.5294	79.3714	85.5294	44	44
522	cbiF	AP012276	141648..142442	795	BAL27872.1	0.662007	27.6015	30.572	27.6015	34	34	41.6937	38.6918	41.6937	58	58
523	slr0240	AP012276	142559..142981	423	BAL27873.1	0.907306	143.42	158.855	143.42	94	94	158.072	146.691	158.072	117	117
524	slr0241	AP012276	142981..143826	846	BAL27874.1	1.28055	193.769	214.623	193.769	254	254	151.317	140.422	151.317	224	224
525	bcp_1	AP012276	144061..144543	483	BAL27875.1	0.579383	78.8363	87.3207	78.8363	59	59	136.069	126.273	136.069	115	115
526	slr0243	AP012276	144554..145081	528	BAL27876.1	0.41606	42.7815	47.3856	42.7815	35	35	102.825	95.4219	102.825	95	95
527	sll0230	AP012276	complement(145164..145529)	366	BAL27877.1	0.48677	88.1679	97.6565	88.1679	50	50	181.128	168.088	181.128	116	116
528	slr0244	AP012276	145761..146615	855	BAL27878.1	1.0647	310.994	344.464	310.994	412	412	292.096	271.065	292.096	437	437
529	psbM	AP012276	complement(146724..146831)	108	BAL27879.1	0.523265	1057.72	1171.55	1057.72	177	177	2021.39	1875.85	2021.39	382	382
530	slr0245	AP012276	146980..147894	915	BAL27880.1	0.814582	31.0351	34.3751	31.0351	44	44	38.0994	35.3563	38.0994	61	61
531	sll0228	AP012276	complement(148022..148942)	921	BAL27881.1	0.461666	45.5486	50.4505	45.5486	65	65	98.6614	91.558	98.6614	159	159
532	ppiB	AP012276	complement(148943..149683)	741	BAL27882.1	0.47016	88.839	98.3998	88.839	102	102	188.955	175.35	188.955	245	245
533	ycf4	AP012276	complement(149889..150455)	567	BAL27883.1	0.699679	259.522	287.451	259.522	228	228	370.915	344.21	370.915	368	368
534	sll0225	AP012276	complement(150594..152132)	1539	BAL27884.1	0.523047	18.4517	20.4374	18.4517	44	44	35.2773	32.7374	35.2773	95	95
535	sll0224	AP012276	complement(152154..153050)	897	BAL27885.1	0.598712	120.156	133.087	120.156	167	167	200.691	186.242	200.691	315	315
536	slr0249	AP012276	153622..153996	375	BAL27886.1	1.22087	68.8415	76.2502	68.8415	40	40	56.3872	52.3274	56.3872	37	37
537	slr0250	AP012276	154143..154679	537	BAL27887.1	0.874149	222.341	246.269	222.341	185	185	254.351	236.038	254.351	239	239
538	slr0251	AP012276	154703..155461	759	BAL27888.1	0.915654	76.5283	84.7643	76.5283	90	90	83.5778	77.5604	83.5778	111	111
539	cobK	AP012276	155473..156258	786	BAL27889.1	0.350474	7.38995	8.18525	7.38995	9	9	21.0856	19.5674	21.0856	29	29
540	psaK_1	AP012276	156391..156651	261	BAL27890.1	0.367802	877.828	972.299	877.828	355	355	2386.69	2214.85	2386.69	1090	1090
541	ssl0410	AP012276	complement(156741..157013)	273	BAL27891.1	0.702258	174.941	193.768	174.941	74	74	249.112	231.176	249.112	119	119
542	ndhB	AP012276	complement(157050..158615)	1566	BAL27892.1	0.798119	402.235	445.523	402.235	976	976	503.978	467.693	503.978	1381	1381
543	phoA	AP012276	complement(158757..159737)	981	BAL27893.1	0.316317	74.9993	83.0707	74.9993	114	114	237.102	220.031	237.102	407	407
544	sgl0002	AP012276	complement(159812..159961)	150	BAL27894.1	0.273019	283.971	314.532	283.971	66	66	1040.11	965.228	1040.11	273	273
545	petN	AP012276	complement(160004..160093)	90	BAL27895.1	0.237154	150.591	166.797	150.591	21	21	634.991	589.272	634.991	100	100
546	slr0254	AP012276	160258..161058	801	BAL27896.1	0.620011	22.5604	24.9884	22.5604	28	28	36.3871	33.7673	36.3871	51	51
547	bcp_2	AP012276	complement(161088..161642)	555	BAL27897.1	0.608088	48.8403	54.0964	48.8403	42	42	80.3177	74.535	80.3177	78	78
548	glmS	AP012276	complement(161768..163663)	1896	BAL27898.1	0.574333	60.5903	67.111	60.5903	178	178	105.497	97.9013	105.497	350	350
549	sll0219	AP012276	complement(164037..165821)	1785	BAL27899.1	0.643442	17.7166	19.6232	17.7166	49	49	27.534	25.5516	27.534	86	86
550	sll0218	AP012276	complement(165871..166389)	519	BAL27900.1	1.50574	9.94819	11.0188	9.94819	8	8	6.60684	6.13116	6.60684	6	6
551	sll0217	AP012276	complement(166416..168152)	1737	BAL27901.1	0.702223	127.071	140.747	127.071	342	342	180.956	167.927	180.956	550	550
552	ctpB	AP012276	168533..169921	1389	BAL27902.1	1.27826	219.311	242.914	219.311	472	472	171.571	159.218	171.571	417	417
553	sll0216	AP012276	complement(169934..170566)	633	BAL27903.1	0.54374	26.5089	29.3617	26.5089	26	26	48.7528	45.2427	48.7528	54	54
554	slr1411	AP012276	170572..171840	1269	BAL27904.1	0.903445	36.6178	40.5586	36.6178	72	72	40.5313	37.6131	40.5313	90	90
555	atpC	AP012276	complement(171939..172883)	945	BAL27905.1	0.299302	310.06	343.428	310.06	454	454	1035.94	961.356	1035.94	1713	1713
556	atpA	AP012276	complement(173014..174525)	1512	BAL27906.1	0.358121	306.048	338.984	306.048	717	717	854.592	793.062	854.592	2261	2261
557	atpD	AP012276	complement(174586..175143)	558	BAL27907.1	0.420775	179.275	198.568	179.275	155	155	426.058	395.383	426.058	416	416
558	atpF	AP012276	complement(175143..175682)	540	BAL27908.1	0.292137	160.152	177.388	160.152	134	134	548.209	508.738	548.209	518	518
559	atpG	AP012276	complement(175708..176139)	432	BAL27909.1	0.243409	256.96	284.614	256.96	172	172	1055.67	979.665	1055.67	798	798
560	atpH	AP012276	complement(176256..176501)	246	BAL27910.1	0.331369	1311.77	1452.94	1311.77	500	500	3958.62	3673.61	3958.62	1704	1704
561	atpI	AP012276	complement(176693..177439)	747	BAL27911.1	0.387965	1162.91	1288.06	1162.91	1346	1346	2997.46	2781.65	2997.46	3918	3918
562	atp1	AP012276	complement(177592..178038)	447	BAL27912.1	0.447725	2167.18	2400.41	2167.18	1501	1501	4840.42	4491.92	4840.42	3786	3786
563	slr1413	AP012276	178237..179682	1446	BAL27913.1	1.32571	24.1017	26.6955	24.1017	54	54	18.1802	16.8713	18.1802	46	46
564	slr1414	AP012276	179734..181047	1314	BAL27914.1	0.649351	33.8903	37.5375	33.8903	69	69	52.191	48.4333	52.191	120	120
565	slr1415	AP012276	181073..182221	1149	BAL27915.1	0.623066	17.9743	19.9087	17.9743	32	32	28.8481	26.7711	28.8481	58	58
566	morR	AP012276	182354..183298	945	BAL27916.1	0.577342	62.1486	68.837	62.1486	91	91	107.646	99.8957	107.646	178	178
567	slr1417	AP012276	183493..183849	357	BAL27917.1	0.756792	348.908	386.457	348.908	193	193	461.035	427.841	461.035	288	288
568	sll1319	AP012276	complement(183935..184924)	990	BAL27918.1	0.107553	1.30382	1.44413	1.30382	2	2	12.1225	11.2497	12.1225	21	21
569	sll1318	AP012276	complement(184968..185636)	669	BAL27919.1	0.247036	6.75295	7.4797	6.75295	7	7	27.3359	25.3678	27.3359	32	32
570	sll1041	AP012276	complement(185772..186554)	783	BAL27920.1	0.389416	16.485	18.2591	16.485	20	20	42.3327	39.2848	42.3327	58	58
571	sll1040	AP012276	complement(186601..188898)	2298	BAL27921.1	0.559908	16.57	18.3533	16.57	59	59	29.5942	27.4635	29.5942	119	119
572	folK	AP012276	189128..189715	588	BAL27922.1	0.713246	52.6848	58.3547	52.6848	48	48	73.8663	68.548	73.8663	76	76
573	slr1094	AP012276	190033..190818	786	BAL27923.1	1.6262	29.5598	32.741	29.5598	36	36	18.1772	16.8685	18.1772	25	25
574	sll1039	AP012276	complement(190815..191954)	1140	BAL27924.1	0.769417	35.1001	38.8776	35.1001	62	62	45.6191	42.3346	45.6191	91	91
575	slr1095	AP012276	192136..192783	648	BAL27925.1	0.564653	9.95971	11.0316	9.95971	10	10	17.6386	16.3687	17.6386	20	20
576	phdD	AP012276	192870..194306	1437	BAL27926.1	0.626691	133.839	148.242	133.839	298	298	213.564	198.187	213.564	537	537
577	slr1097	AP012276	194310..194801	492	BAL27927.1	0.547279	82.6413	91.5351	82.6413	63	63	151.004	140.132	151.004	130	130
578	slr1098	AP012276	194859..195617	759	BAL27928.1	0.745867	120.745	133.739	120.745	142	142	161.885	150.23	161.885	215	215
579	ubiX	AP012276	195685..196305	621	BAL27929.1	1.48221	21.8248	24.1735	21.8248	21	21	14.7244	13.6643	14.7244	16	16
580	slr1100	AP012276	196611..196991	381	BAL27930.1	1.39819	132.127	146.346	132.127	78	78	94.4986	87.6949	94.4986	63	63
581	slr1101	AP012276	197072..197557	486	BAL27931.1	0.824573	61.0862	67.6603	61.0862	46	46	74.0822	68.7484	74.0822	63	63
582	slr1102	AP012276	197624..200185	2562	BAL27932.1	0.91669	66.2519	73.3819	66.2519	263	263	72.2729	67.0694	72.2729	324	324
583	slr1103	AP012276	200405..202525	2121	BAL27933.1	0.824836	90.677	100.436	90.677	298	298	109.933	102.018	109.933	408	408
584	slr1104	AP012276	202554..204395	1842	BAL27934.1	0.965432	94.9514	105.17	94.9514	271	271	98.3512	91.27	98.3512	317	317
585	fus_1	AP012276	204604..206397	1794	BAL27935.1	1.78208	294.634	326.342	294.634	819	819	165.331	153.428	165.331	519	519
586	sll1037	AP012276	complement(206863..208338)	1476	BAL27936.1	0.373942	21.8628	24.2156	21.8628	50	50	58.4656	54.2562	58.4656	151	151
587	sll1036	AP012276	complement(208549..209427)	879	BAL27937.1	0.758753	31.5719	34.9697	31.5719	43	43	41.6103	38.6144	41.6103	64	64
588	ssl2009	AP012276	complement(209527..209826)	300	BAL27938.1	0.889756	111.867	123.907	111.867	52	52	125.728	116.676	125.728	66	66
589	upp	AP012276	complement(209896..210546)	651	BAL27939.1	0.824954	102.112	113.102	102.112	103	103	123.779	114.867	123.779	141	141
590	phb	AP012276	210781..211629	849	BAL27940.1	0.780755	42.5698	47.1512	42.5698	56	56	54.5239	50.5983	54.5239	81	81
591	slr1107	AP012276	211734..213068	1335	BAL27941.1	0.738393	24.6553	27.3087	24.6553	51	51	33.3905	30.9865	33.3905	78	78
592	sll1033	AP012276	complement(213031..215037)	2007	BAL27942.1	0.564653	54.3452	60.1938	54.3452	169	169	96.2452	89.3157	96.2452	338	338
593	ccmN	AP012276	complement(215504..216229)	726	BAL27943.1	0.601082	88.0076	97.4789	88.0076	99	99	146.415	135.874	146.415	186	186
594	ccmM	AP012276	complement(216264..218273)	2010	BAL27944.1	0.622153	173.709	192.404	173.709	541	541	279.206	259.104	279.206	982	982
595	ccmL	AP012276	complement(218407..218709)	303	BAL27945.1	0.720137	468.599	519.03	468.599	220	220	650.708	603.858	650.708	345	345
596	ccmK1	AP012276	complement(218742..219077)	336	BAL27946.1	0.658762	685.726	759.523	685.726	357	357	1040.93	965.986	1040.93	612	612
597	ccmK2	AP012276	complement(219206..219517)	312	BAL27947.1	0.671363	1294.92	1434.27	1294.92	626	626	1928.78	1789.91	1928.78	1053	1053
598	gltD	AP012276	complement(219979..221463)	1485	BAL27948.1	1.39904	205.134	227.21	205.134	472	472	146.625	136.068	146.625	381	381
599	ank	AP012276	221742..223067	1326	BAL27949.1	0.762523	38.4508	42.5888	38.4508	79	79	50.4257	46.7952	50.4257	117	117
600	slr1110	AP012276	223018..223596	579	BAL27950.1	0.716145	28.9812	32.1001	28.9812	26	26	40.4683	37.5547	40.4683	41	41
601	slr1772	AP012276	223673..224806	1134	BAL27951.1	1.18064	52.3596	57.9945	52.3596	92	92	44.3486	41.1555	44.3486	88	88
602	sll1686	AP012276	complement(224897..226363)	1467	BAL27952.1	0.839349	24.1966	26.8006	24.1966	55	55	28.8278	26.7522	28.8278	74	74
603	ssr2972	AP012276	226928..227098	171	BAL27953.1	1.58103	26.4194	29.2627	26.4194	7	7	16.7103	15.5072	16.7103	5	5
604	slr1773	AP012276	227123..227899	777	BAL27954.1	1.04244	9.9674	11.0401	9.9674	12	12	9.56164	8.87321	9.56164	13	13
605	slr1774	AP012276	227943..228812	870	BAL27955.1	0.410657	5.93461	6.57329	5.93461	8	8	14.4515	13.411	14.4515	22	22
606	slr1776	AP012276	228866..230566	1701	BAL27956.1	0.49531	9.48544	10.5063	9.48544	25	25	19.1505	17.7717	19.1505	57	57
607	ycf10	AP012276	complement(230658..231839)	1182	BAL27957.1	0.272591	3.8221	4.23343	3.8221	7	7	14.0214	13.0119	14.0214	29	29
608	chlD	AP012276	232008..234038	2031	BAL27958.1	0.687404	31.1414	34.4928	31.1414	98	98	45.3029	42.0411	45.3029	161	161
609	slr1778	AP012276	234305..234838	534	BAL27959.1	0.23679	15.7117	17.4026	15.7117	13	13	66.353	61.5756	66.353	62	62
610	cad	AP012276	complement(234905..236356)	1452	BAL27960.1	0.392802	7.11173	7.87709	7.11173	16	16	18.1051	16.8016	18.1051	46	46
611	sll1682	AP012276	complement(236356..237438)	1083	BAL27961.1	0.564653	18.4737	20.4619	18.4737	31	31	32.717	30.3614	32.717	62	62
612	pdxJ	AP012276	237600..238325	726	BAL27962.1	0.28369	46.2262	51.2011	46.2262	52	52	162.946	151.214	162.946	207	207
613	slr1780	AP012276	238344..238745	402	BAL27963.1	0.258127	51.3743	56.9031	51.3743	32	32	199.027	184.697	199.027	140	140
614	sll1681	AP012276	complement(238804..240327)	1524	BAL27964.1	0.579131	42.3484	46.9059	42.3484	100	100	73.1239	67.8591	73.1239	195	195
615	msrB	AP012276	complement(240299..240829)	531	BAL27965.1	0.386038	81.4333	90.1971	81.4333	67	67	210.946	195.758	210.946	196	196
616	hhoA	AP012276	complement(240863..242047)	1185	BAL27966.1	0.758618	95.8553	106.171	95.8553	176	176	126.355	117.258	126.355	262	262
617	ycf29	AP012276	242399..243094	696	BAL27967.1	0.775965	103.856	115.033	103.856	112	112	133.841	124.204	133.841	163	163
618	bvdR	AP012276	243158..244144	987	BAL27968.1	0.376435	18.9628	21.0036	18.9628	29	29	50.3746	46.7477	50.3746	87	87
619	sll1678	AP012276	complement(244160..244708)	549	BAL27969.1	0.479955	19.9847	22.1355	19.9847	17	17	41.6387	38.6408	41.6387	40	40
620	sll1677	AP012276	complement(244783..245436)	654	BAL27970.1	0.354053	57.2363	63.3961	57.2363	58	58	161.66	150.021	161.66	185	185
621	malQ	AP012276	complement(245502..247019)	1518	BAL27971.1	0.488454	53.1447	58.8641	53.1447	125	125	108.802	100.968	108.802	289	289
622	sll1675	AP012276	complement(247117..247569)	453	BAL27972.1	0.313696	14.247	15.7803	14.247	10	10	45.4166	42.1466	45.4166	36	36
623	slr1787	AP012276	247619..248713	1095	BAL27973.1	0.564653	20.6289	22.8489	20.6289	35	35	36.5337	33.9033	36.5337	70	70
624	slr1788	AP012276	249062..250117	1056	BAL27974.1	0.945466	22.0019	24.3697	22.0019	36	36	23.271	21.5955	23.271	43	43
625	slr1789	AP012276	250160..251641	1482	BAL27975.1	0.855535	10.8871	12.0588	10.8871	25	25	12.7255	11.8093	12.7255	33	33
626	sll1673	AP012276	complement(251758..253116)	1359	BAL27976.1	0.491003	18.996	21.0403	18.996	40	40	38.6882	35.9027	38.6882	92	92
627	sll1672	AP012276	complement(253125..255629)	2505	BAL27977.1	0.510643	13.3973	14.8391	13.3973	52	52	26.2361	24.3472	26.2361	115	115
628	sll1671	AP012276	complement(255823..256305)	483	BAL27978.1	0.282327	1.33621	1.48001	1.33621	1	1	4.73285	4.39209	4.73285	4	4
629	slr1790	AP012276	256647..257279	633	BAL27979.1	0.436992	90.7419	100.507	90.7419	89	89	207.651	192.7	207.651	230	230
630	cysH	AP012276	257426..258175	750	BAL27980.1	0.486949	40.4444	44.797	40.4444	47	47	83.0568	77.0768	83.0568	109	109
631	hrcA	AP012276	complement(258227..259363)	1137	BAL27981.1	0.500041	50.5186	55.9554	50.5186	89	89	101.029	93.7549	101.029	201	201
632	aroK	AP012276	complement(259702..260271)	570	BAL27982.1	0.403324	28.3065	31.3529	28.3065	25	25	70.1832	65.1301	70.1832	70	70
633	talB	AP012276	260463..261638	1176	BAL27983.1	0.889756	370.989	410.915	370.989	676	676	416.956	386.935	416.956	858	858
634	ssr2998	AP012276	261863..262060	198	BAL27984.1	0.289474	264.023	292.437	264.023	81	81	912.078	846.409	912.078	316	316
635	slr1794	AP012276	262177..263265	1089	BAL27985.1	0.742965	118.529	131.285	118.529	200	200	159.535	148.049	159.535	304	304
636	msrA_2	AP012276	263321..263965	645	BAL27986.1	0.976084	172.104	190.625	172.104	172	172	176.321	163.626	176.321	199	199
637	ssr3000	AP012276	264190..264477	288	BAL27987.1	0.525712	60.5052	67.0168	60.5052	27	27	115.092	106.806	115.092	58	58
638	mom72	AP012276	complement(264516..265316)	801	BAL27988.1	0.488804	46.7323	51.7616	46.7323	58	58	95.6053	88.7219	95.6053	134	134
639	dnaJ_1	AP012276	complement(265414..265938)	525	BAL27989.1	0.662007	41.7966	46.2948	41.7966	34	34	63.1362	58.5905	63.1362	58	58
640	slr1796	AP012276	265995..266600	606	BAL27990.1	0.361957	53.2499	58.9806	53.2499	50	50	147.117	136.524	147.117	156	156
641	sll1665	AP012276	complement(266702..268471)	1770	BAL27991.1	0.883311	396.714	439.408	396.714	1088	1088	449.121	416.785	449.121	1391	1391
642	sll1664	AP012276	complement(268789..269727)	939	BAL27992.1	0.589512	57.0472	63.1866	57.0472	83	83	96.7701	89.8028	96.7701	159	159
643	sll1663	AP012276	complement(269773..270435)	663	BAL27993.1	0.50674	136.281	150.948	136.281	140	140	268.937	249.574	268.937	312	312
644	pheA	AP012276	complement(270476..271369)	894	BAL27994.1	0.812678	55.5872	61.5695	55.5872	77	77	68.4	63.4753	68.4	107	107
645	pleD_1	AP012276	271600..273357	1758	BAL27995.1	0.574355	54.3331	60.1804	54.3331	148	148	94.5984	87.7875	94.5984	291	291
646	sll1660	AP012276	complement(273802..274386)	585	BAL27996.1	0.967977	39.7162	43.9905	39.7162	36	36	41.0302	38.0761	41.0302	42	42
647	cofH	AP012276	complement(274502..275680)	1179	BAL27997.1	0.704419	34.4864	38.1978	34.4864	63	63	48.9573	45.4324	48.9573	101	101
648	sll1658	AP012276	complement(275807..276283)	477	BAL27998.1	1.31752	18.9422	20.9808	18.9422	14	14	14.3771	13.342	14.3771	12	12
649	slr1799	AP012276	276429..278342	1914	BAL27999.1	0.550624	52.9394	58.6368	52.9394	157	157	96.1444	89.2221	96.1444	322	322
650	slr1800	AP012276	278494..279561	1068	BAL28000.1	0.208241	15.7117	17.4026	15.7117	26	26	75.4497	70.0175	75.4497	141	141
651	sll1656	AP012276	complement(279512..280087)	576	BAL28001.1	1.01016	218.491	242.005	218.491	195	195	216.294	200.721	216.294	218	218
652	birA	AP012276	complement(280127..280951)	825	BAL28002.1	1.44254	136.901	151.634	136.901	175	175	94.9022	88.0694	94.9022	137	137
653	sll1654	AP012276	complement(280970..281443)	474	BAL28003.1	1.12931	186.536	206.611	186.536	137	137	165.178	153.285	165.178	137	137
654	menG	AP012276	complement(281507..282223)	717	BAL28004.1	0.548822	46.8065	51.8437	46.8065	52	52	85.2854	79.1449	85.2854	107	107
655	sll1652	AP012276	complement(282290..282700)	411	BAL28005.1	0.905681	127.193	140.882	127.193	81	81	140.44	130.328	140.44	101	101
656	icd	AP012276	283060..284487	1428	BAL28006.1	0.283886	41.1277	45.5539	41.1277	91	91	144.874	134.443	144.874	362	362
657	slr1290	AP012276	284508..285080	573	BAL28007.1	0.63592	65.3273	72.3578	65.3273	58	58	102.729	95.3325	102.729	103	103
658	sll1201	AP012276	complement(285144..285938)	795	BAL28008.1	0.782511	71.4393	79.1275	71.4393	83	88	91.2949	84.7218	91.2949	124	127
659	ndhD2	AP012276	286164..287843	1680	BAL28009.1	1.00594	81.442	90.2067	81.442	212	212	80.9613	75.1322	80.9613	238	238
660	sll1200	AP012276	complement(287929..289104)	1176	BAL28010.1	0.640502	20.8544	23.0987	20.8544	38	38	32.5595	30.2152	32.5595	67	67
661	slr1293	AP012276	289322..290845	1524	BAL28011.1	1.12931	6.77574	7.50494	6.77574	16	16	5.99991	5.56793	5.99991	16	16
662	ycf19	AP012276	290902..291174	273	BAL28012.1	0.471736	390.07	432.049	390.07	165	165	826.883	767.349	826.883	395	395
663	sufA	AP012276	291626..292708	1083	BAL28013.1	0.0258778	59.5927	66.006	59.5927	100	100	2302.85	2137.05	2302.85	4364	4364
664	trmD	AP012276	complement(292790..293485)	696	BAL28014.1	0.0862195	47.2914	52.3809	47.2914	51	51	548.501	509.009	548.501	668	668
665	ssl2384	AP012276	complement(293496..293669)	174	BAL28015.1	0.23905	107.565	119.141	107.565	29	29	449.968	417.571	449.968	137	137
666	pfkA_1	AP012276	complement(293878..294963)	1086	BAL28016.1	0.586371	48.1368	53.3172	48.1368	81	81	82.0927	76.1822	82.0927	156	156
667	slr1298	AP012276	295076..297343	2268	BAL28017.1	0.727088	13.3745	14.8138	13.3745	47	47	18.3946	17.0702	18.3946	73	73
668	psbU	AP012276	complement(297493..297888)	396	BAL28018.1	0.878491	2249.08	2491.13	2249.08	1380	1380	2560.17	2375.84	2560.17	1774	1774
669	sll1193	AP012276	complement(298083..298580)	498	BAL28019.1	0.806647	174.955	193.783	174.955	135	135	216.891	201.276	216.891	189	189
670	slr1299	AP012276	299522..300883	1362	BAL28020.1	0.352629	37.4345	41.4631	37.4345	79	79	106.158	98.5149	106.158	253	253
671	ubiH	AP012276	301110..302354	1245	BAL28021.1	1.08502	50.8017	56.269	50.8017	98	98	46.821	43.45	46.821	102	102
672	sll1192	AP012276	complement(302367..302789)	423	BAL28022.1	0.978732	19.8347	21.9692	19.8347	13	13	20.2657	18.8066	20.2657	15	15
673	sll1191	AP012276	complement(302786..303190)	405	BAL28023.1	1.21194	70.1163	77.6622	70.1163	44	44	57.8547	53.6893	57.8547	41	41
674	ssr2153	AP012276	303424..303621	198	BAL28024.1	3.4012	15020	16636.4	15020	4608	4608	4416.07	4098.12	4416.07	1530	1530
675	slr1301	AP012276	303939..305546	1608	BAL28025.1	0.576044	71.041	78.6863	71.041	177	177	123.326	114.446	123.326	347	347
676	slr1302	AP012276	305595..306824	1230	BAL28026.1	0.632412	102.842	113.91	102.842	196	196	162.62	150.911	162.62	350	350
677	slr1303	AP012276	306844..308076	1233	BAL28027.1	0.454477	17.2732	19.1321	17.2732	33	33	38.0067	35.2703	38.0067	82	82
678	glcE	AP012276	complement(308114..309418)	1305	BAL28028.1	0.765213	61.3243	67.924	61.3243	124	124	80.1402	74.3702	80.1402	183	183
679	slr1305	AP012276	309649..312171	2523	BAL28029.1	0.427305	10.7437	11.8999	10.7437	42	42	25.1429	23.3327	25.1429	111	111
680	slr1306	AP012276	312258..313715	1458	BAL28030.1	0.922936	142.534	157.874	142.534	322	322	154.436	143.317	154.436	394	394
681	sll1188	AP012276	complement(313705..314199)	495	BAL28031.1	0.661614	75.6213	83.7597	75.6213	58	58	114.298	106.069	114.298	99	99
682	lgt	AP012276	complement(314255..315106)	852	BAL28032.1	0.582117	75.7499	83.9021	75.7499	100	100	130.128	120.759	130.128	194	194
683	sll1186	AP012276	complement(315134..315784)	651	BAL28033.1	0.448764	90.2157	99.9246	90.2157	91	91	201.032	186.558	201.032	229	229
684	hemF	AP012276	complement(315882..316904)	1023	BAL28034.1	0.189329	89.5848	99.2259	89.5848	142	142	473.17	439.103	473.17	847	847
685	ho1	AP012276	complement(317127..317849)	723	BAL28035.1	0.363959	1258.64	1394.1	1258.64	1410	1410	3458.2	3209.21	3458.2	4375	4375
686	slr1307	AP012276	317984..318571	588	BAL28036.1	0.774381	26.3424	29.1774	26.3424	24	24	34.0174	31.5682	34.0174	35	35
687	rpl28	AP012276	318661..318897	237	BAL28037.1	0.6665	1211.81	1342.22	1211.81	445	445	1818.16	1687.26	1818.16	754	754
688	slr0962	AP012276	319096..320529	1434	BAL28038.1	0.783837	121.517	134.594	121.517	270	270	155.028	143.866	155.028	389	389
689	sll0943	AP012276	complement(320785..321447)	663	BAL28039.1	0.967977	11.6812	12.9384	11.6812	12	12	12.0677	11.1988	12.0677	14	14
690	sir	AP012276	321699..323606	1908	BAL28040.1	0.87509	121.095	134.127	121.095	358	358	138.38	128.417	138.38	462	462
691	slr0964	AP012276	323805..324731	927	BAL28041.1	0.805154	53.6084	59.3777	53.6084	77	77	66.5815	61.7878	66.5815	108	108
692	dnaN	AP012276	324831..326006	1176	BAL28042.1	0.304044	23.0496	25.5302	23.0496	42	42	75.8101	70.3519	75.8101	156	156
693	trpA	AP012276	326150..326944	795	BAL28043.1	0.27637	47.085	52.1522	47.085	58	58	170.369	158.103	170.369	237	237
694	slr0967	AP012276	327100..327552	453	BAL28044.1	1.27869	304.886	337.697	304.886	214	214	238.437	221.27	238.437	189	189
695	sll0939	AP012276	complement(327604..327981)	378	BAL28045.1	1.7567	119.516	132.379	119.516	70	70	68.0347	63.1363	68.0347	45	45
696	sll0938	AP012276	complement(328006..329181)	1176	BAL28046.1	0.290393	9.8784	10.9415	9.8784	18	18	34.0174	31.5682	34.0174	70	70
697	ssl1792	AP012276	complement(329222..329521)	300	BAL28047.1	0.307993	6.45389	7.14845	6.45389	3	3	20.9547	19.446	20.9547	11	11
698	sll0936	AP012276	complement(329555..331060)	1506	BAL28048.1	0.944334	41.5689	46.0425	41.5689	97	97	44.0193	40.85	44.0193	116	116
699	cbiH	AP012276	331144..333027	1884	BAL28049.1	0.564653	24.322	26.9395	24.322	71	71	43.0742	39.9729	43.0742	142	142
700	slr0971	AP012276	333130..334485	1356	BAL28050.1	0.712053	74.7242	82.766	74.7242	157	157	104.942	97.3864	104.942	249	249
701	ccmA	AP012276	complement(334568..335623)	1056	BAL28051.1	1.09409	550.659	609.92	550.659	901	901	503.302	467.065	503.302	930	930
702	sll0933	AP012276	complement(335819..336295)	477	BAL28052.1	0.37764	282.781	313.213	282.781	209	209	748.81	694.897	748.81	625	625
703	rps15	AP012276	complement(336313..336582)	270	BAL28053.1	0.33023	387.233	428.907	387.233	162	162	1172.62	1088.19	1172.62	554	554
704	sll0932	AP012276	complement(336747..337760)	1014	BAL28054.1	0.382982	24.8227	27.4941	24.8227	39	39	64.8141	60.1476	64.8141	115	115
705	sll0931	AP012276	complement(337861..338331)	471	BAL28055.1	0.305854	35.6266	39.4607	35.6266	26	26	116.482	108.096	116.482	96	96
706	sll0930	AP012276	complement(338503..339096)	594	BAL28056.1	0.504584	68.4504	75.8169	68.4504	63	63	135.657	125.89	135.657	141	141
707	apcD	AP012276	complement(339140..339625)	486	BAL28057.1	0.631874	1310.7	1451.75	1310.7	987	987	2074.3	1924.96	2074.3	1764	1764
708	metX	AP012276	complement(339737..340999)	1263	BAL28058.1	0.325016	201.333	223	201.333	394	394	619.455	574.855	619.455	1369	1369
709	dusA	AP012276	complement(341135..342139)	1005	BAL28059.1	0.956267	67.4287	74.6853	67.4287	105	105	70.5124	65.4356	70.5124	124	124
710	sll0925	AP012276	complement(342151..342759)	609	BAL28060.1	1.07874	67.8241	75.1233	67.8241	64	64	62.8735	58.3467	62.8735	67	67
711	infC	AP012276	343026..343559	534	BAL28061.1	0.284338	128.111	141.898	128.111	106	106	450.558	418.119	450.558	421	421
712	slr0975	AP012276	343863..344720	858	BAL28062.1	1.3834	294.863	326.596	294.863	392	392	213.144	197.798	213.144	320	320
713	sll0924	AP012276	complement(344744..345298)	555	BAL28063.1	1.72368	67.4461	74.7046	67.4461	58	58	39.1292	36.3119	39.1292	38	38
714	epsB	AP012276	complement(345536..347806)	2271	BAL28064.1	1.31447	183.585	203.342	183.585	646	646	139.664	129.609	139.664	555	555
715	sll0922	AP012276	complement(348384..348734)	351	BAL28065.1	1.85529	338.324	374.734	338.324	184	184	182.356	169.227	182.356	112	112
716	slr0976	AP012276	348701..349429	729	BAL28066.1	1.05075	94.7279	104.922	94.7279	107	107	90.153	83.6621	90.153	115	115
717	slr0977	AP012276	349468..350298	831	BAL28067.1	0.578425	32.6189	36.1294	32.6189	42	42	56.3927	52.3325	56.3927	82	82
718	slr0978	AP012276	350509..350916	408	BAL28068.1	0.691068	129.711	143.67	129.711	82	82	187.696	174.182	187.696	134	134
719	slr0980	AP012276	351036..351467	432	BAL28069.1	0.894034	141.926	157.2	141.926	95	95	158.748	147.318	158.748	120	120
720	slr0981	AP012276	351538..352101	564	BAL28070.1	0.465316	101.843	112.804	101.843	89	89	218.869	203.111	218.869	216	216
721	rfbB_1	AP012276	352263..353555	1293	BAL28071.1	0.54852	25.4562	28.1958	25.4562	51	51	46.4088	43.0675	46.4088	105	105
722	rfbF	AP012276	353552..354322	771	BAL28072.1	0.551522	35.1574	38.941	35.1574	42	42	63.7461	59.1565	63.7461	86	86
723	rfbG	AP012276	354323..355405	1083	BAL28073.1	0.773082	60.7846	67.3262	60.7846	102	102	78.6263	72.9653	78.6263	149	149
724	rfbC_1	AP012276	355424..355993	570	BAL28074.1	0.507035	24.9098	27.5905	24.9098	22	22	49.1282	45.5911	49.1282	49	49
725	slr1610	AP012276	355909..357210	1302	BAL28075.1	0.703771	21.3147	23.6086	21.3147	43	43	30.2864	28.1058	30.2864	69	69
726	slr1611	AP012276	357245..357697	453	BAL28076.1	0.635235	64.1115	71.0111	64.1115	45	45	100.926	93.6592	100.926	80	80
727	slr1612	AP012276	357748..358608	861	BAL28077.1	0.562473	96.6959	107.102	96.6959	129	129	171.912	159.535	171.912	259	259
728	slr1613	AP012276	358760..359350	591	BAL28078.1	0.906071	75.35	83.4591	75.35	69	69	83.1612	77.1737	83.1612	86	86
729	slr1614	AP012276	359668..359973	306	BAL28079.1	0.777555	88.5828	98.116	88.5828	42	42	113.925	105.722	113.925	61	61
730	rfbE	AP012276	360030..361166	1137	BAL28080.1	0.680905	23.2726	25.7772	23.2726	41	41	34.1789	31.7181	34.1789	68	68
731	slr1616	AP012276	361163..362188	1026	BAL28081.1	0.795957	73.597	81.5175	73.597	117	117	92.4636	85.8063	92.4636	166	166
732	slr1617	AP012276	362185..363420	1236	BAL28082.1	0.586942	82.5012	91.3799	82.5012	158	158	140.561	130.441	140.561	304	304
733	slr1618	AP012276	363433..364218	786	BAL28083.1	0.411726	86.2161	95.4946	86.2161	105	105	209.402	194.325	209.402	288	288
734	slr1619	AP012276	364247..364996	750	BAL28084.1	0.400336	115.31	127.719	115.31	134	134	288.032	267.294	288.032	378	378
735	slr1062	AP012276	365274..365621	348	BAL28085.1	0.447713	124.256	137.628	124.256	67	67	277.535	257.553	277.535	169	169
736	slr1063	AP012276	365716..367785	2070	BAL28086.1	0.370817	34.296	37.987	34.296	110	110	92.4878	85.8288	92.4878	335	335
737	rfbU	AP012276	367807..368910	1104	BAL28087.1	0.474636	50.8595	56.3329	50.8595	87	87	107.155	99.4397	107.155	207	207
738	slr1065	AP012276	369149..370219	1071	BAL28088.1	0.366783	45.7979	50.7267	45.7979	76	76	124.864	115.874	124.864	234	234
739	slr1066	AP012276	370285..371490	1206	BAL28089.1	0.267324	26.2223	29.0443	26.2223	49	49	98.0918	91.0294	98.0918	207	207
740	galE_1	AP012276	371487..372509	1023	BAL28090.1	0.417231	47.3159	52.408	47.3159	75	75	113.404	105.24	113.404	203	203
741	slr1068	AP012276	372811..373167	357	BAL28091.1	0.787888	54.2344	60.071	54.2344	30	30	68.8351	63.8791	68.8351	43	43
742	slr1069	AP012276	373231..373644	414	BAL28092.1	1.01638	28.0604	31.0802	28.0604	18	18	27.6083	25.6205	27.6083	20	20
743	slr1070	AP012276	373654..374511	858	BAL28093.1	0.489366	19.5572	21.662	19.5572	26	26	39.9644	37.0871	39.9644	60	60
744	slr1071	AP012276	374646..375452	807	BAL28094.1	0.381971	36.788	40.7471	36.788	46	46	96.3109	89.3766	96.3109	136	136
745	yefA	AP012276	375470..376432	963	BAL28095.1	0.463172	59.6465	66.0657	59.6465	89	89	128.778	119.507	128.778	217	217
746	slr1073	AP012276	376485..377639	1155	BAL28096.1	0.345066	24.5862	27.2322	24.5862	44	44	71.2509	66.1209	71.2509	144	144
747	slr1074	AP012276	377620..378951	1332	BAL28097.1	0.345914	16.4739	18.2468	16.4739	34	34	47.6243	44.1954	47.6243	111	111
748	slr1075	AP012276	379065..379913	849	BAL28098.1	0.317617	6.84158	7.57787	6.84158	2	9	21.5403	19.9895	21.5403	8	32
749	slr1076	AP012276	380030..381175	1146	BAL28099.1	0.478175	26.4688	29.3174	26.4688	47	47	55.3539	51.3685	55.3539	111	111
750	slr1077	AP012276	381177..382337	1161	BAL28100.1	0.709436	27.2386	30.1701	27.2386	49	49	38.3948	35.6304	38.3948	78	78
751	ssr1765	AP012276	382392..382646	255	BAL28101.1	0.903445	121.485	134.559	121.485	48	48	134.469	124.787	134.469	60	60
752	ssr1766	AP012276	382643..382873	231	BAL28102.1	0.611708	72.6412	80.4588	72.6412	26	26	118.752	110.202	118.752	48	48
753	galE_2	AP012276	382949..383266	318	BAL28103.1	1.04244	73.0629	80.9259	73.0629	36	36	70.0886	65.0423	70.0886	39	39
754	slr1079	AP012276	383300..383794	495	BAL28104.1	0.70985	57.3679	63.5418	57.3679	44	44	80.817	74.9983	80.817	70	70
755	ssr1768	AP012276	384050..384247	198	BAL28105.1	0.662007	55.4122	61.3756	55.4122	17	17	83.7033	77.6768	83.7033	29	29
756	slr1081	AP012276	384343..384975	633	BAL28106.1	0.532692	50.9786	56.4649	50.9786	50	50	95.7	88.8098	95.7	106	106
757	slr1082	AP012276	384980..385390	411	BAL28107.1	0.765631	62.8116	69.5713	62.8116	40	40	82.0389	76.1323	82.0389	59	59
758	slr1083	AP012276	385467..386012	546	BAL28108.1	0.711954	34.2789	37.968	34.2789	29	29	48.1476	44.6811	48.1476	46	46
759	slr1084	AP012276	386177..386719	543	BAL28109.1	0.692155	67.748	75.039	67.748	57	57	97.8798	90.8326	97.8798	93	93
760	slr1085	AP012276	386783..388057	1275	BAL28110.1	0.36788	21.7661	24.1085	21.7661	43	43	59.1662	54.9063	59.1662	132	132
761	slr1087	AP012276	388218..389303	1086	BAL28111.1	0.651523	26.7426	29.6207	26.7426	45	45	41.0464	38.0911	41.0464	78	78
762	sll1025	AP012276	complement(389277..390455)	1179	BAL28112.1	1.12931	85.395	94.5852	85.395	156	156	75.6172	70.1729	75.6172	156	156
763	ssl1972	AP012276	complement(390455..390736)	282	BAL28113.1	1.32798	290.654	321.934	290.654	127	127	218.869	203.111	218.869	108	108
764	sll1024	AP012276	complement(391007..391831)	825	BAL28114.1	0.542936	19.5572	21.662	19.5572	25	25	36.0213	33.4278	36.0213	52	52
765	sucC	AP012276	complement(392001..393206)	1206	BAL28115.1	0.888806	45.4876	50.383	45.4876	85	85	51.1784	47.4936	51.1784	108	108
766	sll1022	AP012276	complement(393223..393951)	729	BAL28116.1	1.59044	299.234	331.437	299.234	338	338	188.145	174.599	188.145	240	240
767	sll1021	AP012276	complement(394098..396119)	2022	BAL28117.1	0.725532	36.7061	40.6564	36.7061	115	115	50.592	46.9494	50.592	179	179
768	sll1020	AP012276	complement(396159..397043)	885	BAL28118.1	0.564653	25.5239	28.2707	25.5239	35	35	45.2027	41.9482	45.2027	70	70
769	obgE	AP012276	397139..398245	1107	BAL28119.1	0.752871	12.8262	14.2065	12.8262	22	22	17.0363	15.8097	17.0363	33	33
770	hliA_1	AP012276	398290..398463	174	BAL28120.1	0.592606	196.584	217.74	196.584	53	53	331.728	307.844	331.728	101	101
771	HAGH1	AP012276	complement(398543..399316)	774	BAL28121.1	0.571143	36.6888	40.6372	36.6888	44	44	64.2374	59.6124	64.2374	87	87
772	pyrC_1	AP012276	complement(399377..400702)	1326	BAL28122.1	0.390275	22.8758	25.3377	22.8758	47	47	58.6145	54.3944	58.6145	136	136
773	amt2	AP012276	complement(400822..402150)	1329	BAL28123.1	0.206316	9.22678	10.2198	9.22678	19	19	44.7217	41.5018	44.7217	104	104
774	slr1400	AP012276	402392..403534	1143	BAL28124.1	0.651971	63.2402	70.0461	63.2402	112	112	96.9986	90.0148	96.9986	194	194
775	slr0670	AP012276	403654..404529	876	BAL28125.1	0.97531	167.978	186.056	167.978	228	228	172.23	159.83	172.23	264	264
776	nucH	AP012276	complement(404647..410286)	5640	BAL28126.1	0.870392	18.08	20.0258	18.08	158	158	20.7723	19.2767	20.7723	203	205
777	sll0654	AP012276	complement(410417..414646)	4230	BAL28127.1	1.9164	34.1766	37.8547	34.1766	222	224	17.8338	16.5498	17.8338	131	132
778	cysC	AP012276	414973..415506	534	BAL28128.1	0.0999714	32.632	36.1439	32.632	27	27	326.414	302.912	326.414	305	305
779	exbB_2	AP012276	415664..416347	684	BAL28129.1	0.41332	119.831	132.727	119.831	127	127	289.923	269.049	289.923	347	347
780	slr0678	AP012276	416458..417267	810	BAL28130.1	0.656573	79.6777	88.2525	79.6777	100	100	121.354	112.616	121.354	172	172
781	fmu/fmv	AP012276	417303..418643	1341	BAL28131.1	0.830372	72.1912	79.9603	72.1912	150	150	86.9383	80.6789	86.9383	204	204
782	slr0680	AP012276	418806..419228	423	BAL28132.1	1.20523	193.769	214.623	193.769	116	127	160.774	149.199	160.774	117	119
783	slr0681	AP012276	419065..420366	1302	BAL28133.1	1.1202	60.9699	67.5315	60.9699	121	123	54.4278	50.5091	54.4278	123	124
784	hisD_1	AP012276	420604..421833	1230	BAL28134.1	1.52665	38.3036	42.4258	38.3036	73	73	25.0899	23.2834	25.0899	54	54
785	sll0651	AP012276	complement(421867..422361)	495	BAL28135.1	#DIV/0!	0	0	0	0	0	0	0	0	0	0
786	sll0650	AP012276	complement(422355..422714)	360	BAL28136.1	0.225861	1.79275	1.98568	1.79275	1	1	7.93738	7.3659	7.93738	5	5
787	sll0649	AP012276	complement(422874..423611)	738	BAL28137.1	0.9142	14.8667	16.4666	14.8667	17	17	16.262	15.0911	16.262	21	21
788	lim	AP012276	complement(423592..424668)	1077	BAL28138.1	1.28289	85.0931	94.2507	85.0931	142	142	66.3291	61.5535	66.3291	125	125
789	sll0647	AP012276	complement(424796..425566)	771	BAL28139.1	0.771693	34.3203	38.0138	34.3203	41	41	44.4741	41.272	44.4741	60	60
790	cyaA_1	AP012276	complement(425570..427840)	2271	BAL28140.1	0.733689	28.9871	32.1067	28.9871	102	102	39.5087	36.6641	39.5087	157	157
791	sll0645	AP012276	complement(427879..428646)	768	BAL28141.1	0.640958	70.5894	78.1862	70.5894	84	84	110.131	102.202	110.131	148	148
792	sll0644	AP012276	complement(428721..429716)	996	BAL28142.1	0.705816	9.71971	10.7657	9.71971	15	15	13.7709	12.7794	13.7709	24	24
793	slr0686	AP012276	429912..430271	360	BAL28143.1	0.301148	50.1969	55.5991	50.1969	28	28	166.685	154.684	166.685	105	105
794	ureG	AP012276	complement(430526..431146)	621	BAL28144.1	0.560471	69.6313	77.125	69.6313	67	67	124.237	115.292	124.237	135	135
795	pleD_2	AP012276	431452..432897	1446	BAL28145.1	1.07089	24.548	27.1898	24.548	55	55	22.9229	21.2725	22.9229	58	58
796	sll0641	AP012276	complement(432881..434410)	1530	BAL28146.1	0.704521	28.684	31.7709	28.684	68	68	40.7141	37.7828	40.7141	109	109
797	Sac1	AP012276	complement(434422..436260)	1839	BAL28147.1	0.531438	28.0757	31.0971	28.0757	80	80	52.8296	49.0259	52.8296	170	170
798	slr0688	AP012276	436336..437367	1032	BAL28148.1	1.19989	42.5256	47.1022	42.5256	68	68	35.4413	32.8896	35.4413	64	64
799	ssr1155	AP012276	437807..438010	204	BAL28149.1	0.612709	322.695	357.423	322.695	102	102	526.669	488.749	526.669	188	188
800	slr0689	AP012276	438024..439220	1197	BAL28150.1	0.770417	86.8067	96.1488	86.8067	161	161	112.675	104.563	112.675	236	236
801	sll0639	AP012276	complement(439286..440539)	1254	BAL28151.1	0.818912	63.8184	70.6865	63.8184	124	124	77.9307	72.3198	77.9307	171	171
802	sll0638	AP012276	complement(440712..442088)	1377	BAL28152.1	0.941089	63.2734	70.0829	63.2734	135	135	67.2343	62.3935	67.2343	162	162
803	ycf45	AP012276	442266..444035	1770	BAL28153.1	0.90815	70.3729	77.9464	70.3729	193	193	77.4904	71.9112	77.4904	240	240
804	thiE	AP012276	complement(444015..445046)	1032	BAL28154.1	0.527828	26.8912	29.7852	26.8912	43	43	50.9469	47.2788	50.9469	92	92
805	btpA	AP012276	complement(445163..446026)	864	BAL28155.1	0.486304	67.228	74.4631	67.228	90	90	138.243	128.29	138.243	209	209
806	slr0695	AP012276	446332..446853	522	BAL28156.1	1.10716	185.457	205.415	185.457	150	150	167.506	155.446	167.506	153	153
807	slr1590	AP012276	446909..447796	888	BAL28157.1	0.804203	136.636	151.341	136.636	188	188	169.903	157.67	169.903	264	264
808	slr1591	AP012276	447933..449081	1149	BAL28158.1	1.06987	10.1105	11.1986	10.1105	18	18	9.45025	8.76985	9.45025	19	19
809	slr1592	AP012276	449268..450143	876	BAL28159.1	0.42349	2.21024	2.4481	2.21024	3	3	5.2191	4.84333	5.2191	8	8
810	slr1593	AP012276	450842..451753	912	BAL28160.1	1.5913	21.9376	24.2985	21.9376	31	31	13.786	12.7934	13.786	22	22
811	slr1594	AP012276	451837..453024	1188	BAL28161.1	0.872646	9.23537	10.2293	9.23537	17	17	10.5832	9.82121	10.5832	22	22
812	slr1595	AP012276	453316..454548	1233	BAL28162.1	0.42349	6.28116	6.95713	6.28116	12	12	14.8319	13.764	14.8319	32	32
813	sll1516	AP012276	complement(454814..456688)	1875	BAL28163.1	0.888634	16.522	18.3	16.522	48	48	18.5925	17.2539	18.5925	61	61
814	pxcA	AP012276	457077..458399	1323	BAL28164.1	0.311533	11.7077	12.9677	11.7077	24	24	37.5811	34.8753	37.5811	87	87
815	sll1515	AP012276	complement(458510..458959)	450	BAL28165.1	5.68409	3039.07	3366.13	3039.07	2119	2119	534.662	496.167	534.662	421	421
816	slr1597	AP012276	459302..460198	897	BAL28166.1	0.367365	19.4264	21.5171	19.4264	27	27	52.8805	49.0732	52.8805	83	83
817	hsp17	AP012276	complement(460352..460792)	441	BAL28167.1	0.853254	99.5158	110.226	99.5158	68	68	116.631	108.234	116.631	90	90
818	ccsA	AP012276	complement(461058..462062)	1005	BAL28168.1	1.8981	280.632	310.833	280.632	437	437	147.849	137.204	147.849	260	260
819	sll1512	AP012276	complement(462249..462656)	408	BAL28169.1	0.890415	64.8553	71.835	64.8553	41	41	72.8372	67.593	72.8372	52	52
820	lipA_1	AP012276	462911..463780	870	BAL28170.1	0.626583	63.7971	70.6629	63.7971	86	86	101.817	94.4868	101.817	155	155
821	sll1511	AP012276	complement(463792..464409)	618	BAL28171.1	0.260609	9.39887	10.4104	9.39887	9	9	36.065	33.4684	36.065	39	39
822	sll1510	AP012276	complement(464539..465279)	741	BAL28172.1	0.705816	13.0646	14.4706	13.0646	15	15	18.5098	17.1772	18.5098	24	24
823	ycf20	AP012276	complement(465334..465663)	330	BAL28173.1	0.40655	17.6015	19.4958	17.6015	9	9	43.2948	40.1777	43.2948	25	25
824	slr1599	AP012276	466029..466595	567	BAL28174.1	0.781016	84.2307	93.2955	84.2307	74	74	107.848	100.083	107.848	107	107
825	slr1600	AP012276	466690..467139	450	BAL28175.1	0.268442	83.1835	92.1356	83.1835	58	58	309.875	287.565	309.875	244	244
826	psaM	AP012276	467303..467398	96	BAL28176.1	1.64227	5660.6	6269.79	5660.6	842	842	3446.81	3198.64	3446.81	579	579
827	slr1601	AP012276	467538..467915	378	BAL28177.1	0.575071	235.618	260.975	235.618	138	138	409.72	380.221	409.72	271	271
828	lpxC	AP012276	complement(467938..468768)	831	BAL28178.1	0.504584	48.9284	54.1941	48.9284	63	63	96.9679	89.9864	96.9679	141	141
829	sll1507	AP012276	complement(469103..469648)	546	BAL28179.1	0.621118	78.0141	86.4099	78.0141	66	66	125.603	116.559	125.603	120	120
830	slr1603	AP012276	469694..471016	1323	BAL28180.1	1.76761	70.2464	77.8063	70.2464	144	144	39.7409	36.8796	39.7409	92	92
831	ftsH_1	AP012276	471182..473032	1851	BAL28181.1	1.08427	444.904	492.784	444.904	1276	1276	410.325	380.783	410.325	1329	1329
832	ssr2699	AP012276	473516..473764	249	BAL28182.1	0.564653	2.59192	2.87087	2.59192	1	1	4.59029	4.2598	4.59029	2	2
833	vapC_1	AP012276	complement(474055..474306)	252	BAL28183.1	0.403324	12.8053	14.1834	12.8053	5	5	31.7495	29.4636	31.7495	14	14
834	vapB	AP012276	complement(474307..474534)	228	BAL28184.1	0.141163	2.83065	3.13529	2.83065	1	1	20.0523	18.6086	20.0523	8	8
835	ssl2920	AP012276	complement(474891..475109)	219	BAL28185.1	0.0627392	2.94698	3.26413	2.94698	1	1	46.9719	43.59	46.9719	18	18
836	sll1505	AP012276	complement(475212..475547)	336	BAL28186.1	0.199289	5.7624	6.38255	5.7624	3	3	28.9148	26.8329	28.9148	17	17
837	sll1504	AP012276	complement(475537..475845)	309	BAL28187.1	0.215106	8.35455	9.25366	8.35455	4	4	38.8392	36.0429	38.8392	21	21
838	sll1503	AP012276	complement(475975..477501)	1527	BAL28188.1	0.22872	20.2873	22.4706	20.2873	48	48	88.6991	82.3129	88.6991	237	237
839	gltB_1	AP012276	complement(477770..482422)	4653	BAL28189.1	1.1321	112.35	124.441	112.35	810	810	99.2403	92.0952	99.2403	808	808
840	ssr2708	AP012276	482644..482805	162	BAL28190.1	1.19989	67.726	75.0146	67.726	17	17	56.4436	52.3798	56.4436	16	16
841	ssr2711	AP012276	483047..483301	255	BAL28191.1	0.868697	25.3094	28.0332	25.3094	10	10	29.1349	27.0372	29.1349	13	13
842	gdhB	AP012276	483428..484666	1239	BAL28192.1	1.91388	83.8641	92.8895	83.8641	161	161	43.819	40.6641	43.819	95	95
843	cbiA	AP012276	complement(484901..486349)	1449	BAL28193.1	0.564653	13.8075	15.2935	13.8075	31	31	24.4531	22.6925	24.4531	62	62
844	sll1500	AP012276	complement(486346..487455)	1110	BAL28194.1	0.787888	17.4429	19.3201	17.4429	30	30	22.1389	20.5449	22.1389	43	43
845	slr1609	AP012276	487569..489479	1911	BAL28195.1	0.594795	49.983	55.3622	49.983	148	148	84.0341	77.9838	84.0341	281	281
846	slr1041	AP012276	489824..490990	1167	BAL28196.1	0.749251	38.1592	42.2659	38.1592	69	69	50.9298	47.263	50.9298	104	104
847	slr1042	AP012276	491186..491551	366	BAL28197.1	0.863047	331.511	367.188	331.511	188	188	384.117	356.461	384.117	246	246
848	slr1043	AP012276	491598..492161	564	BAL28198.1	1.11807	227.717	252.224	227.717	199	199	203.67	189.006	203.67	201	201
849	mcpA	AP012276	492232..494841	2610	BAL28199.1	0.825888	137.98	152.829	137.98	558	558	167.068	155.04	167.068	763	763
850	slr1045	AP012276	494930..495721	792	BAL28200.1	0.667869	44.8187	49.642	44.8187	55	55	67.107	62.2754	67.107	93	93
851	slr1046	AP012276	495728..496108	381	BAL28201.1	0.176879	22.0211	24.3911	22.0211	13	13	124.498	115.534	124.498	83	83
852	pleD_3	AP012276	496552..497946	1395	BAL28202.1	0.860424	22.2069	24.5968	22.2069	48	48	25.8093	23.9511	25.8093	63	63
853	slr1048	AP012276	498178..501198	3021	BAL28203.1	0.481001	9.82718	10.8848	9.82718	46	46	20.4307	18.9597	20.4307	108	108
854	sll1011	AP012276	complement(501280..502092)	813	BAL28204.1	0.513321	11.9075	13.189	11.9075	15	15	23.1971	21.5269	23.1971	33	33
855	rps32	AP012276	502144..502317	174	BAL28205.1	0.447136	578.625	640.896	578.625	156	156	1294.07	1200.9	1294.07	394	394
856	slr1050	AP012276	502416..503849	1434	BAL28206.1	0.500794	67.0593	74.2761	67.0593	149	149	133.906	124.265	133.906	336	336
857	envM	AP012276	504045..504821	777	BAL28207.1	0.61019	55.6513	61.6405	55.6513	67	67	91.2033	84.6368	91.2033	124	124
858	slr1052	AP012276	504857..505369	513	BAL28208.1	0.717262	59.1292	65.4927	59.1292	47	47	82.4374	76.502	82.4374	74	74
859	slr1053	AP012276	505458..506261	804	BAL28209.1	0.221123	22.4762	24.8951	22.4762	28	28	101.646	94.3276	101.646	143	143
860	frpC	AP012276	complement(506354..508129)	1776	BAL28210.1	2.5806	396.1	438.728	396.1	1090	1090	153.492	142.441	153.492	477	477
861	chlH	AP012276	508617..512612	3996	BAL28211.1	0.861315	118.87	131.663	118.87	736	736	138.01	128.074	138.01	965	965
862	slr1056	AP012276	512717..514735	2019	BAL28212.1	0.307294	12.7863	14.1624	12.7863	40	40	41.6093	38.6135	41.6093	147	147
863	sll1006	AP012276	complement(514949..516046)	1098	BAL28213.1	0.353962	12.3435	13.6719	12.3435	21	21	34.8724	32.3617	34.8724	67	67
864	mazG	AP012276	complement(516190..516999)	810	BAL28214.1	0.0364292	0.796777	0.882525	0.796777	1	1	21.8719	20.2972	21.8719	31	31
865	sll1004	AP012276	complement(517129..518313)	1185	BAL28215.1	0.556225	17.9729	19.9071	17.9729	33	33	32.3122	29.9858	32.3122	67	67
866	sll1003	AP012276	complement(518389..520374)	1986	BAL28216.1	0.501914	3.89963	4.31931	3.89963	12	12	7.76952	7.21013	7.76952	27	27
867	ssl1923	AP012276	complement(520784..520942)	159	BAL28217.1	0.332149	20.2953	22.4794	20.2953	5	5	61.1029	56.7036	61.1029	17	17
868	ssl1922	AP012276	complement(521020..521271)	252	BAL28218.1	0.376435	2.56107	2.83669	2.56107	1	1	6.80347	6.31363	6.80347	2	3
869	ssl1920	AP012276	complement(521178..521459)	282	BAL28219.1	1.12931	9.15445	10.1397	9.15445	3	4	8.10626	7.52263	8.10626	3	4
870	ycf22_1	AP012276	complement(521585..522955)	1371	BAL28220.1	0.596375	22.1249	24.506	22.1249	47	47	37.099	34.4279	37.099	89	89
871	sll1001	AP012276	complement(523118..523900)	783	BAL28221.1	0.418732	27.2003	30.1276	27.2003	33	33	64.9588	60.2819	64.9588	89	89
872	ssl1918	AP012276	complement(523923..524216)	294	BAL28222.1	0.593364	68.0512	75.3749	68.0512	31	31	114.687	106.43	114.687	59	59
873	slr1753	AP012276	524448..529697	5250	BAL28223.1	0.350929	16.3499	18.1094	16.3499	133	133	46.5902	43.2358	46.5902	428	428
874	gpsA	AP012276	529837..530790	954	BAL28224.1	0.659515	49.3851	54.6999	49.3851	73	73	74.881	69.4897	74.881	125	125
875	sll1647	AP012276	complement(530819..531337)	519	BAL28225.1	0.548046	41.0363	45.4526	41.0363	33	33	74.8775	69.4865	74.8775	68	68
876	glnA	AP012276	531548..532969	1422	BAL28226.1	0.18284	200.606	222.195	200.606	442	442	1097.17	1018.17	1097.17	2730	2730
877	slr1759	AP012276	533188..537576	4389	BAL28227.1	0.727775	12.7931	14.1699	12.7931	87	87	17.5783	16.3127	17.5783	135	135
878	slr1760	AP012276	537573..538520	948	BAL28228.1	1.63122	44.2514	49.0137	44.2514	65	65	27.1278	25.1746	27.1278	45	45
879	ytfC	AP012276	538517..539122	606	BAL28229.1	0.419249	184.245	204.073	184.245	173	173	439.464	407.823	439.464	466	466
880	sll1643	AP012276	complement(539390..539956)	567	BAL28230.1	0.942443	132.037	146.247	132.037	116	116	140.101	130.014	140.101	139	139
881	slr1762	AP012276	540200..540865	666	BAL28231.1	0.666001	22.2882	24.6869	22.2882	23	23	33.4657	31.0562	33.4657	39	39
882	slr1763	AP012276	540965..542167	1203	BAL28232.1	0.226499	38.0903	42.1896	38.0903	71	71	168.17	156.062	168.17	354	354
883	sll1642	AP012276	complement(542207..542698)	492	BAL28233.1	0.125478	3.9353	4.35881	3.9353	3	3	31.3623	29.1043	31.3623	27	27
884	capA	AP012276	542905..543444	540	BAL28234.1	0.834705	40.6356	45.0088	40.6356	34	34	48.6826	45.1775	48.6826	46	46
885	gad	AP012276	complement(543570..544973)	1404	BAL28235.1	0.662467	68.4921	75.8632	68.4921	149	149	103.39	95.9456	103.39	254	254
886	ssr2962	AP012276	545131..545355	225	BAL28236.1	0.700949	51.6311	57.1876	51.6311	18	18	73.6589	68.3556	73.6589	29	29
887	slr1767	AP012276	545352..545690	339	BAL28237.1	0.51887	32.3646	35.8477	32.3646	17	17	62.3752	57.8843	62.3752	37	37
888	sll1640	AP012276	complement(545693..546658)	966	BAL28238.1	0.658762	23.3837	25.9002	23.3837	35	35	35.4964	32.9407	35.4964	60	60
889	ureD	AP012276	complement(546655..547467)	813	BAL28239.1	0.43816	133.365	147.717	133.365	168	168	304.374	282.459	304.374	433	433
890	sll1638	AP012276	complement(547527..547976)	450	BAL28240.1	0.42274	707.06	783.153	707.06	493	493	1672.57	1552.14	1672.57	1317	1317
891	slr1768	AP012276	548338..549234	897	BAL28241.1	0.960559	53.2428	58.9728	53.2428	74	74	55.429	51.4382	55.429	87	87
892	fbp_1	AP012276	complement(549231..549803)	573	BAL28242.1	0.669219	36.0427	39.9216	36.0427	32	32	53.8578	49.9802	53.8578	54	54
893	slr1770	AP012276	550096..550431	336	BAL28243.1	1.9842	361.111	399.973	361.111	188	188	181.993	168.89	181.993	107	107
894	slr1771	AP012276	550665..552272	1608	BAL28244.1	1.35822	35.7212	39.5655	35.7212	89	89	26.3	24.4064	26.3	74	74
895	dgt_1	AP012276	complement(552322..552969)	648	BAL28245.1	0.133985	6.9718	7.7221	6.9718	7	7	52.034	48.2876	52.034	59	59
896	psbK	AP012276	complement(553167..553304)	138	BAL28246.1	0.516523	1028.88	1139.61	1028.88	220	220	1991.94	1848.52	1991.94	481	481
897	sll1752	AP012276	complement(553399..554121)	723	BAL28247.1	1.41163	98.192	108.759	98.192	110	110	69.5591	64.551	69.5591	88	88
898	ssr3122	AP012276	554391..554648	258	BAL28248.1	0.572182	190.115	210.575	190.115	76	76	332.263	308.34	332.263	150	150
899	slr1846	AP012276	554829..555152	324	BAL28249.1	0.352408	175.291	194.156	175.291	88	88	497.409	461.597	497.409	282	282
900	slr1847	AP012276	555364..555708	345	BAL28250.1	0.121658	86.0519	95.3127	86.0519	46	46	707.324	656.398	707.324	427	427
901	hisD_2	AP012276	555744..557048	1305	BAL28251.1	1.3074	159.74	176.931	159.74	323	323	122.181	113.384	122.181	279	279
902	merA	AP012276	557525..559081	1557	BAL28252.1	0.334609	6.63213	7.34588	6.63213	16	16	19.8205	18.3935	19.8205	54	54
903	sll1751	AP012276	complement(559117..559452)	336	BAL28253.1	0.396783	24.9704	27.6577	24.9704	13	13	62.9321	58.4011	62.9321	37	37
904	ureC	AP012276	complement(559563..561272)	1710	BAL28254.1	0.976431	74.7293	82.7716	74.7293	198	198	76.5331	71.0228	76.5331	229	229
905	sll1749	AP012276	complement(561290..561760)	471	BAL28255.1	0.450024	72.6234	80.4391	72.6234	53	53	161.377	149.758	161.377	133	133
906	ssl3342	AP012276	complement(561811..562065)	255	BAL28256.1	0.449001	83.5209	92.5094	83.5209	33	33	186.015	172.622	186.015	83	83
907	slr1851	AP012276	562659..563147	489	BAL28257.1	2.05932	40.9142	45.3174	40.9142	31	31	19.8678	18.4374	19.8678	17	17
908	ssr3129	AP012276	563207..563392	186	BAL28258.1	0.564653	31.2285	34.5893	31.2285	9	9	55.3056	51.3237	55.3056	18	18
909	sll1946	AP012276	complement(563550..566027)	2478	BAL28259.1	0.707805	23.1798	25.6744	23.1798	89	89	32.7489	30.391	32.7489	142	142
910	ycf23	AP012276	566161..566907	747	BAL28260.1	0.69275	584.047	646.902	584.047	676	676	843.084	782.383	843.084	1102	1102
911	dxs	AP012276	complement(567085..569007)	1923	BAL28261.1	0.988024	347.362	384.745	347.362	1035	1035	351.573	326.26	351.573	1183	1183
912	rub	AP012276	569243..569590	348	BAL28262.1	0.75119	276.33	306.069	276.33	149	149	367.857	341.372	367.857	224	224
913	ycf48	AP012276	569646..570674	1029	BAL28263.1	0.816165	153.664	170.201	153.664	245	245	188.276	174.72	188.276	339	339
914	psbE	AP012276	570760..571005	246	BAL28264.1	0.447559	1128.12	1249.53	1128.12	430	430	2520.6	2339.12	2520.6	1085	1085
915	psbF	AP012276	571042..571176	135	BAL28265.1	0.563179	913.106	1011.37	913.106	191	191	1621.34	1504.61	1621.34	383	383
916	psbL	AP012276	571186..571305	120	BAL28266.1	0.351107	720.684	798.244	720.684	134	134	2052.61	1904.82	2052.61	431	431
917	psbJ	AP012276	571338..571457	120	BAL28267.1	0.54614	634.633	702.931	634.633	118	118	1162.03	1078.37	1162.03	244	244
918	proB	AP012276	571542..572669	1128	BAL28268.1	0.393241	22.314	24.7154	22.314	39	39	56.7438	52.6584	56.7438	112	112
919	ssr3452	AP012276	572838..573011	174	BAL28269.1	0.282327	7.41826	8.21661	7.41826	2	2	26.2755	24.3837	26.2755	8	8
920	slr2036	AP012276	573596..574612	1017	BAL28270.1	0.513321	3.173	3.51448	3.173	3	5	6.18133	5.73628	6.18133	4	11
921	slr2037	AP012276	574664..575566	903	BAL28271.1	0	0	0	0	0	0	8.22745	7.63509	8.22745	13	13
922	slr2038	AP012276	575579..576229	651	BAL28272.1	0.480556	19.8276	21.9615	19.8276	20	20	41.2598	38.2891	41.2598	47	47
923	sll1942	AP012276	complement(576241..577005)	765	BAL28273.1	0.428642	43.8696	48.5908	43.8696	52	52	102.346	94.9768	102.346	137	137
924	gyrA_1	AP012276	complement(577036..579798)	2763	BAL28274.1	0.35421	19.8545	21.9913	19.8545	85	85	56.0529	52.0172	56.0529	271	271
925	divK	AP012276	579889..580296	408	BAL28275.1	1.2525	96.492	106.876	96.492	61	61	77.0393	71.4926	77.0393	55	55
926	slr2042	AP012276	580330..581157	828	BAL28276.1	1.02892	63.9153	70.7939	63.9153	82	82	62.1187	57.6462	62.1187	90	90
927	sll1940	AP012276	complement(581154..581627)	474	BAL28277.1	0.955567	44.9321	49.7677	44.9321	33	33	47.0215	43.636	47.0215	39	39
928	sll1939	AP012276	complement(581620..582264)	645	BAL28278.1	0.641733	179.108	198.383	179.108	179	179	279.101	259.006	279.101	315	315
929	ssr3465	AP012276	582340..582579	240	BAL28279.1	0.833949	129.078	142.969	129.078	48	48	154.779	143.635	154.779	65	65
930	sll1938	AP012276	complement(582583..583194)	612	BAL28280.1	0.742116	48.5096	53.7302	48.5096	46	46	65.3667	60.6604	65.3667	70	70
931	fur_1	AP012276	complement(583259..583675)	417	BAL28281.1	0.663243	57.2647	63.4275	57.2647	37	37	86.3405	80.1241	86.3405	63	63
932	zntC	AP012276	583782..584798	1017	BAL28282.1	0.47358	8.24981	9.13765	8.24981	13	13	17.4201	16.1659	17.4201	31	31
933	slr2044	AP012276	584776..585645	870	BAL28283.1	0.537765	7.41826	8.21661	7.41826	10	10	13.7946	12.8014	13.7946	21	21
934	slr2045	AP012276	585599..586444	846	BAL28284.1	0.923978	27.4634	30.419	27.4634	36	36	29.723	27.583	29.723	44	44
935	ssr3467	AP012276	586960..587247	288	BAL28285.1	0.522515	69.469	76.9452	69.469	31	31	132.951	123.379	132.951	67	67
936	slr2046	AP012276	587330..593227	5898	BAL28286.1	0.565254	51.4298	56.9646	51.4298	470	470	90.9852	84.4344	90.9852	939	939
937	phoH	AP012276	593359..594345	987	BAL28287.1	0.560276	41.8489	46.3527	41.8489	64	64	74.6934	69.3156	74.6934	129	129
938	slr2048	AP012276	594556..595752	1197	BAL28288.1	0.275761	22.6452	25.0823	22.6452	42	42	82.1191	76.2066	82.1191	172	172
939	slr2049	AP012276	595835..596413	579	BAL28289.1	0.574445	98.0902	108.647	98.0902	88	88	170.757	158.462	170.757	173	173
940	cpcG1	AP012276	596600..597349	750	BAL28290.1	0.579742	3521.24	3900.2	3521.24	4092	4092	6073.81	5636.51	6073.81	7971	7971
941	slr2052	AP012276	597693..598589	897	BAL28291.1	1.48608	362.627	401.652	362.627	504	504	244.015	226.446	244.015	383	383
942	sll1934	AP012276	complement(598586..599032)	447	BAL28292.1	0.949814	183.366	203.099	183.366	127	127	193.054	179.155	193.054	151	151
943	slr2053	AP012276	599164..600015	852	BAL28293.1	0.740323	44.6924	49.5022	44.6924	59	59	60.3688	56.0224	60.3688	90	90
944	dnaJ_2	AP012276	complement(600012..600935)	924	BAL28294.1	0.328287	17.4618	19.3411	17.4618	25	25	53.1908	49.3611	53.1908	86	86
945	dnaK_1	AP012276	complement(601044..603359)	2316	BAL28295.1	0.581342	58.2411	64.5089	58.2411	209	209	100.184	92.9707	100.184	406	406
946	gylA	AP012276	complement(603545..604828)	1284	BAL28296.1	0.778255	421.212	466.542	421.212	838	838	541.226	502.258	541.226	1216	1216
947	sll1930	AP012276	complement(605643..606137)	495	BAL28297.1	0	0	0	0	0	0	1.15453	1.0714	1.15453	1	1
948	comE	AP012276	complement(606567..608696)	2130	BAL28298.1	0.807825	29.694	32.8896	29.694	98	98	36.7579	34.1114	36.7579	137	137
949	slr1906	AP012276	609571..610155	585	BAL28299.1	1.09704	37.5098	41.5466	37.5098	34	34	34.1918	31.73	34.1918	35	35
950	slr1907	AP012276	610050..610589	540	BAL28300.1	0.867146	51.3921	56.9229	51.3921	43	43	59.2658	54.9988	59.2658	56	56
951	slr1908	AP012276	611159..612934	1776	BAL28301.1	0.907403	3698.63	4096.68	3698.63	10178	10178	4076.06	3782.59	4076.06	12667	12667
952	slr1909	AP012276	613204..613845	642	BAL28302.1	0.256968	38.2006	42.3117	38.2006	38	38	148.659	137.956	148.659	167	167
953	amiA_1	AP012276	613903..614919	1017	BAL28303.1	0.806647	25.384	28.1158	25.384	40	40	31.4686	29.2029	31.4686	56	56
954	slr1911	AP012276	614943..615371	429	BAL28304.1	1.51751	129.379	143.302	129.379	86	86	85.2575	79.1191	85.2575	64	64
955	sll1837	AP012276	complement(615368..615805)	438	BAL28305.1	0.745028	139.982	155.046	139.982	95	95	187.888	174.36	187.888	144	144
956	slr1912	AP012276	616070..616426	357	BAL28306.1	0.237015	92.1984	102.121	92.1984	51	51	388.998	360.991	388.998	243	243
957	slr1913	AP012276	616558..616911	354	BAL28307.1	0.282327	21.8776	24.2321	21.8776	12	12	77.4904	71.9112	77.4904	48	48
958	slr1914	AP012276	616924..617280	357	BAL28308.1	0.402219	47.0031	52.0616	47.0031	26	26	116.86	108.446	116.86	73	73
959	sll1835	AP012276	complement(617492..618289)	798	BAL28309.1	0.307695	76.0233	84.2049	76.0233	94	94	247.073	229.285	247.073	345	345
960	sll1834	AP012276	complement(618413..618817)	405	BAL28310.1	0.665696	89.239	98.8428	89.239	56	56	134.054	124.402	134.054	95	95
961	slr1915	AP012276	619317..619631	315	BAL28311.1	0.386088	81.9542	90.774	81.9542	40	40	212.268	196.985	212.268	117	117
962	slr1916	AP012276	619720..620571	852	BAL28312.1	0.84698	99.9899	110.751	99.9899	132	132	118.055	109.555	118.055	176	176
963	slr1917	AP012276	620662..621570	909	BAL28313.1	4.08197	246.37	272.884	246.37	347	347	60.3555	56.01	60.3555	96	96
964	slr1918	AP012276	621663..622349	687	BAL28314.1	1.17225	256.465	284.065	256.465	273	273	218.781	203.029	218.781	263	263
965	ftsI	AP012276	complement(622402..624225)	1824	BAL28315.1	0.761236	64.3974	71.3278	64.3974	182	182	84.5958	78.505	84.5958	270	270
966	sll1832	AP012276	complement(624238..624696)	459	BAL28316.1	0.667317	164.511	182.216	164.511	117	117	246.526	228.776	246.526	198	198
967	glcF	AP012276	complement(625001..626383)	1383	BAL28317.1	0.667317	36.3994	40.3167	36.3994	78	78	54.5458	50.6186	54.5458	132	132
968	sll1830	AP012276	complement(626451..627527)	1077	BAL28318.1	0.673145	163.594	181.2	163.594	273	273	243.03	225.532	243.03	458	458
969	slr1919	AP012276	627674..629374	1701	BAL28319.1	0.887819	47.4272	52.5313	47.4272	125	125	53.4198	49.5737	53.4198	159	159
970	slr1920	AP012276	629500..630606	1107	BAL28320.1	0.392802	18.6562	20.664	18.6562	32	32	47.4952	44.0757	47.4952	92	92
971	sll0998	AP012276	complement(630657..631694)	1038	BAL28321.1	0.793168	167.254	185.254	167.254	269	269	210.868	195.686	210.868	383	383
972	ssl1911	AP012276	complement(631998..632195)	198	BAL28322.1	20.9273	12624.2	13982.8	12624.2	3873	3873	603.241	559.809	603.241	209	209
973	slr1019	AP012276	632315..633259	945	BAL28323.1	3.33414	42.343	46.8999	42.343	62	62	12.6998	11.7854	12.6998	21	21
974	sll0997	AP012276	complement(633891..634982)	1092	BAL28324.1	0.708322	62.6477	69.3898	62.6477	106	106	88.4451	82.0772	88.4451	169	169
975	sll0996	AP012276	complement(634994..636349)	1356	BAL28325.1	0.494865	37.1241	41.1194	37.1241	78	78	75.0188	69.6176	75.0188	178	178
976	sqdB	AP012276	636474..637625	1152	BAL28326.1	0.587694	550.149	609.356	550.149	982	982	936.115	868.716	936.115	1887	1887
977	ssr1698	AP012276	637768..638058	291	BAL28327.1	0.770796	95.3668	105.63	95.3668	43	43	123.725	114.817	123.725	63	63
978	sll0995	AP012276	complement(638095..638790)	696	BAL28328.1	1.02425	108.492	120.168	108.492	117	117	105.923	98.2967	105.923	129	129
979	sll0994	AP012276	complement(638876..639685)	810	BAL28329.1	0.627392	19.9194	22.0631	19.9194	25	25	31.7495	29.4636	31.7495	45	45
980	sll0993	AP012276	complement(639618..640715)	1098	BAL28330.1	0.704419	37.0305	41.0157	37.0305	63	63	52.5689	48.784	52.5689	101	101
981	argD	AP012276	640839..642128	1290	BAL28331.1	0.880398	95.5576	105.841	95.5576	191	191	108.539	100.724	108.539	245	245
982	slr1023	AP012276	642255..642569	315	BAL28332.1	0.427305	28.684	31.7709	28.684	14	14	67.1276	62.2945	67.1276	37	37
983	slr1024	AP012276	642576..643217	642	BAL28333.1	0.690132	33.1742	36.7444	33.1742	33	33	48.0694	44.6085	48.0694	54	54
984	slr1025	AP012276	643246..643584	339	BAL28334.1	0.705816	19.038	21.0869	19.038	10	10	26.9731	25.031	26.9731	16	16
985	sll0992	AP012276	complement(643651..644481)	831	BAL28335.1	1.22187	51.2583	56.7747	51.2583	66	66	41.9506	38.9303	41.9506	61	61
986	sll0990	AP012276	complement(644490..645599)	1110	BAL28336.1	1.51393	107.565	119.141	107.565	185	185	71.0503	65.9348	71.0503	138	138
987	slr1028	AP012276	646231..658149	11919	BAL28337.1	0.864488	21.3884	23.6902	21.3884	395	395	24.7411	22.9598	24.7411	516	516
988	chlI	AP012276	658364..659437	1074	BAL28338.1	0.290393	64.8995	71.8839	64.8995	108	108	223.488	207.398	223.488	420	420
989	tyrS_1	AP012276	659472..660686	1215	BAL28339.1	0.227377	15.9355	17.6505	15.9355	29	30	70.0842	65.0382	70.0842	149	149
990	slr1032	AP012276	660874..661227	354	BAL28340.1	0.0921883	7.29253	8.07735	7.29253	4	4	79.1048	73.4094	79.1048	49	49
991	slr1033	AP012276	661224..662921	1698	BAL28341.1	0.369591	6.84158	7.57787	6.84158	18	18	18.5112	17.1784	18.5112	55	55
992	tyrS_2	AP012276	663054..663290	237	BAL28342.1	0.752871	5.44632	6.03245	5.44632	2	2	7.23407	6.71323	7.23407	3	3
993	slr1034	AP012276	663444..663833	390	BAL28343.1	0.747982	168.794	186.96	168.794	102	102	225.666	209.418	225.666	154	154
994	slr1035	AP012276	663890..664417	528	BAL28344.1	0.510508	40.3368	44.6778	40.3368	33	33	79.013	73.3242	79.013	73	73
995	sll0986	AP012276	complement(664496..664882)	387	BAL28345.1	0.361378	13.3414	14.7772	13.3414	5	8	36.9181	34.26	36.9181	20	25
996	sll0985	AP012276	complement(665005..667119)	2115	BAL28346.1	0.357614	5.79782	6.42178	5.79782	19	19	16.2125	15.0453	16.2125	60	60
997	sll0984	AP012276	complement(667031..667477)	447	BAL28347.1	0.645318	5.77529	6.39683	5.77529	4	4	8.94953	8.30518	8.94953	7	7
998	slr1037	AP012276	667549..667944	396	BAL28348.1	0.638304	42.374	46.9343	42.374	26	26	66.3854	61.6057	66.3854	46	46
999	sll0983	AP012276	complement(667954..668583)	630	BAL28349.1	0.376435	20.4885	22.6935	20.4885	20	20	54.4278	50.5091	54.4278	60	60
1000	sll0982	AP012276	complement(668878..669264)	387	BAL28350.1	0.730155	125.075	138.536	125.075	75	75	171.3	158.966	171.3	116	116
1001	sll0981	AP012276	complement(669356..669853)	498	BAL28351.1	0.785006	73.8698	81.8197	73.8698	57	57	94.101	87.3259	94.101	82	82
1002	sll0980	AP012276	complement(669861..671051)	1191	BAL28352.1	1.29457	50.9375	56.4194	50.9375	94	94	39.347	36.5141	39.347	82	82
1003	slr1039	AP012276	671108..671809	702	BAL28353.1	1.40754	79.0648	87.5737	79.0648	86	86	56.1723	52.1279	56.1723	69	69
1004	slr1376	AP012276	672014..672346	333	BAL28354.1	0.743413	253.892	281.215	253.892	131	131	341.522	316.933	341.522	199	199
1005	lepB_2	AP012276	672393..673049	657	BAL28355.1	0.710491	93.3211	103.364	93.3211	95	95	131.347	121.891	131.347	151	151
1006	slr1378	AP012276	673001..673714	714	BAL28356.1	0.658762	50.6187	56.0663	50.6187	56	56	76.8392	71.3069	76.8392	96	96
1007	cydA	AP012276	673991..675442	1452	BAL28357.1	0.525441	29.7803	32.9853	29.7803	67	67	56.6769	52.5962	56.6769	144	144
1008	cydB	AP012276	675446..676456	1011	BAL28358.1	0.657051	20.4277	22.6262	20.4277	32	32	31.09	28.8516	31.09	55	55
1009	trmB	AP012276	complement(676453..677088)	636	BAL28359.1	0.775014	35.5167	39.339	35.5167	35	35	45.8272	42.5277	45.8272	51	51
1010	ackA	AP012276	complement(677147..678388)	1242	BAL28360.1	0.411616	20.2658	22.4468	20.2658	39	39	49.2348	45.69	49.2348	107	107
1011	clcD	AP012276	complement(678385..679125)	741	BAL28361.1	0.355522	44.4195	49.1999	44.4195	51	51	124.941	115.946	124.941	162	162
1012	ssr2315	AP012276	679397..679612	216	BAL28362.1	0.55569	92.6253	102.594	92.6253	31	31	166.685	154.684	166.685	63	63
1013	slr1383	AP012276	679792..680280	489	BAL28363.1	0.692983	71.27	78.94	71.27	54	54	102.845	95.4404	102.845	87	88
1014	ssr2317	AP012276	680198..680470	273	BAL28364.1	0.861839	68.5578	75.936	68.5578	29	29	79.5483	73.8209	79.5483	37	38
1015	slr1384	AP012276	680499..681674	1176	BAL28365.1	0.808639	31.8304	35.256	31.8304	58	58	39.3629	36.5289	39.3629	81	81
1016	slr1385	AP012276	681809..682777	969	BAL28366.1	0.627392	36.632	40.5743	36.632	55	55	58.3877	54.1839	58.3877	99	99
1017	ssr2318	AP012276	682956..683219	264	BAL28367.1	1.12931	14.6679	16.2465	14.6679	6	6	12.9884	12.0533	12.9884	6	6
1018	pobA	AP012276	complement(683242..684258)	1017	BAL28368.1	0.376435	7.61521	8.43475	7.61521	12	12	20.2298	18.7733	20.2298	36	36
1019	ssl2559	AP012276	complement(684245..684541)	297	BAL28369.1	0.250957	4.34605	4.81377	4.34605	2	2	17.3179	16.0711	17.3179	9	9
1020	sll1296	AP012276	complement(684662..687436)	2775	BAL28370.1	0.967977	47.4448	52.5508	47.4448	204	204	49.0144	45.4855	49.0144	238	238
1021	pilJ	AP012276	complement(687493..690354)	2862	BAL28371.1	0.971965	86.3676	95.6624	86.3676	383	383	88.8588	82.4611	88.8588	445	445
1022	sll1293	AP012276	complement(690501..690968)	468	BAL28372.1	1.10877	148.936	164.964	148.936	108	108	134.325	124.654	134.325	110	110
1023	sll1292	AP012276	complement(691001..691366)	366	BAL28373.1	0.710752	158.702	175.782	158.702	90	90	223.288	207.211	223.288	143	143
1024	sll1291	AP012276	complement(691473..692678)	1206	BAL28374.1	0.474987	52.4445	58.0886	52.4445	98	98	110.413	102.463	110.413	233	233
1025	rnb	AP012276	complement(693313..695313)	2001	BAL28375.1	0.685306	45.7997	50.7287	45.7997	142	142	66.8311	62.0194	66.8311	234	234
1026	sll1289	AP012276	complement(695392..695976)	585	BAL28376.1	0.536621	73.9164	81.8712	73.9164	67	67	137.744	127.827	137.744	141	141
1027	ftsH_2	AP012276	696077..698074	1998	BAL28377.1	1.81832	174.752	193.559	174.752	541	541	96.1067	89.1872	96.1067	336	336
1028	slr1391	AP012276	698090..698560	471	BAL28378.1	0.714459	42.4778	47.0493	42.4778	31	31	59.4545	55.1739	59.4545	49	49
1029	ssr2333	AP012276	698825..699064	240	BAL28379.1	0.0132083	5.37824	5.95705	5.37824	2	2	407.188	377.871	407.188	171	171
1030	feoB	AP012276	699072..700916	1845	BAL28380.1	0.0328588	19.9388	22.0847	19.9388	57	57	606.803	563.114	606.803	1959	1959
1031	hliA_2	AP012276	complement(701240..701452)	213	BAL28381.1	0.922726	203.01	224.857	203.01	67	67	220.011	204.17	220.011	82	82
1032	slr1393	AP012276	701445..704369	2925	BAL28382.1	0.582701	24.933	27.6163	24.933	113	113	42.7886	39.7079	42.7886	219	219
1033	slr1394	AP012276	704492..704947	456	BAL28383.1	0.810026	193.9	214.767	193.9	137	137	239.375	222.14	239.375	191	191
1034	sll1286	AP012276	complement(705409..706119)	711	BAL28384.1	1.25092	65.3559	72.3894	65.3559	72	72	52.2461	48.4844	52.2461	65	65
1035	slr1395	AP012276	706157..707233	1077	BAL28385.1	0.382507	12.5842	13.9385	12.5842	21	21	32.8992	30.5305	32.8992	62	62
1036	slr1396	AP012276	707539..708156	618	BAL28386.1	0.359938	83.5455	92.5366	83.5455	80	80	232.111	215.399	232.111	251	251
1037	slr1397	AP012276	708291..708914	624	BAL28387.1	0.656326	255.466	282.96	255.466	247	247	389.237	361.213	389.237	425	425
1038	slr1398	AP012276	709147..709899	753	BAL28388.1	0.630529	57.4251	63.6051	57.4251	67	67	91.0744	84.5171	91.0744	120	120
1039	cofG	AP012276	complement(710138..711079)	942	BAL28389.1	0.310559	7.53639	8.34745	7.53639	11	11	24.2672	22.52	24.2672	40	40
1040	sll1284	AP012276	complement(711083..711697)	615	BAL28390.1	0.389416	31.4824	34.8705	31.4824	30	30	80.8452	75.0244	80.8452	87	87
1041	spoIID	AP012276	complement(711710..712885)	1176	BAL28391.1	0.430599	58.1728	64.4334	58.1728	106	106	135.098	125.371	135.098	278	278
1042	slr1699	AP012276	713033..713881	849	BAL28392.1	1.01511	60.814	67.3588	60.814	80	80	59.909	55.5957	59.909	89	89
1043	sll1584	AP012276	complement(713876..714280)	405	BAL28393.1	0.610936	52.5873	58.2467	52.5873	33	33	86.0765	79.8791	86.0765	61	61
1044	lig	AP012276	complement(714567..716255)	1689	BAL28394.1	0.924152	184.179	204	184.179	482	482	199.295	184.946	199.295	589	589
1045	sll1582	AP012276	complement(716411..719767)	3357	BAL28395.1	0.207212	3.84503	4.25884	3.84503	20	20	18.556	17.22	18.556	109	109
1046	gumB	AP012276	complement(719835..721349)	1515	BAL28396.1	0.733346	133.338	147.688	133.338	313	313	181.821	168.73	181.821	482	482
1047	ssr2843	AP012276	721531..721794	264	BAL28397.1	0.68565	41.5591	46.0317	41.5591	17	17	60.6127	56.2487	60.6127	28	28
1048	slr1702	AP012276	721826..722581	756	BAL28398.1	0.533284	58.0509	64.2983	58.0509	68	68	108.856	101.018	108.856	144	144
1049	serS	AP012276	722672..723964	1293	BAL28399.1	0.349137	40.4304	44.7815	40.4304	81	81	115.801	107.464	115.801	262	262
1050	cpcD	AP012276	complement(724196..724447)	252	BAL28400.1	0.549112	2443.26	2706.2	2443.26	954	954	4449.47	4129.12	4449.47	1962	1962
1051	cpcC_1	AP012276	complement(724594..725469)	876	BAL28401.1	0.809071	6922.46	7667.45	6922.46	9396	9396	8556.06	7940.04	8556.06	13115	13115
1052	cpcC_2	AP012276	complement(725515..726336)	822	BAL28402.1	0.742523	6779.73	7509.36	6779.73	8635	8635	9130.66	8473.26	9130.66	13133	13133
1053	cpcA	AP012276	complement(726451..726939)	489	BAL28403.1	0.366848	25114.7	27817.6	25114.7	19029	19029	68461	63531.9	68461	58579	58579
1054	cpcB	AP012276	complement(727050..727568)	519	BAL28404.1	0.303788	23850.8	26417.6	23850.8	19180	19180	78511.3	72858.6	78511.3	71300	71300
1055	ssr2848	AP012276	728373..728591	219	BAL28405.1	14.989	860.519	953.127	860.519	292	292	57.4101	53.2767	57.4101	22	22
1056	slr1704	AP012276	728762..729586	825	BAL28406.1	3.7425	1205.51	1335.24	1205.51	1541	1541	322.113	298.922	322.113	465	465
1057	sll1575	AP012276	complement(730210..731460)	1251	BAL28407.1	3.27335	103.18	114.284	103.18	200	200	31.5211	29.2516	31.5211	69	69
1058	sll1574	AP012276	complement(731465..731776)	312	BAL28408.1	0.871745	91.0164	100.812	91.0164	44	44	104.407	96.89	104.407	57	57
1059	sll1573	AP012276	complement(731850..732164)	315	BAL28409.1	0.883805	73.7587	81.6966	73.7587	36	36	83.4559	77.4472	83.4559	46	46
1060	aspA	AP012276	732520..733386	867	BAL28410.1	1.78274	186.843	206.951	186.843	251	251	104.806	97.2605	104.806	159	159
1061	dfrA	AP012276	733527..734534	1008	BAL28411.1	0.609231	26.2509	29.0761	26.2509	41	41	43.0887	39.9863	43.0887	76	76
1062	ssr2857	AP012276	734767..734961	195	BAL28412.1	1.19035	129.078	142.969	129.078	39	39	108.437	100.63	108.437	37	37
1063	slr1708	AP012276	735087..736322	1236	BAL28413.1	1.066	219.829	243.487	219.829	421	421	206.218	191.37	206.218	446	446
1064	dnaE_1	AP012276	complement(736537..737913)	1377	BAL28414.1	0.607616	46.4005	51.3941	46.4005	99	99	76.3649	70.8667	76.3649	184	184
1065	sll1571	AP012276	complement(737969..738910)	942	BAL28415.1	1.10868	147.302	163.155	147.302	215	215	132.863	123.297	132.863	219	219
1066	sll1570	AP012276	complement(739011..739742)	732	BAL28416.1	1.22751	66.1259	73.2424	66.1259	75	75	53.8701	49.9915	53.8701	69	69
1067	mrcB	AP012276	739784..742033	2250	BAL28417.1	1.12931	87.7729	97.219	87.7729	306	306	77.7229	72.1269	77.7229	306	306
1068	sll1568	AP012276	complement(742182..742790)	609	BAL28418.1	0.48647	29.6731	32.8665	29.6731	28	28	60.9966	56.605	60.9966	65	65
1069	sll1927	AP012276	complement(742882..744834)	1953	BAL28419.1	0.673999	62.1265	68.8126	62.1265	188	188	92.1761	85.5395	92.1761	315	315
1070	sll1926	AP012276	complement(744912..745349)	438	BAL28420.1	0.538153	194.501	215.433	194.501	132	132	361.423	335.401	361.423	277	277
1071	slr2005	AP012276	745441..746226	786	BAL28421.1	0.60694	100.175	110.956	100.175	122	122	165.049	153.166	165.049	227	227
1072	sll1925	AP012276	complement(746405..747121)	717	BAL28422.1	0.903445	75.6104	83.7476	75.6104	84	84	83.6912	77.6656	83.6912	105	105
1073	mrpC_1	AP012276	747336..747680	345	BAL28423.1	0.338792	5.61208	6.21605	5.61208	3	3	16.565	15.3723	16.565	10	10
1074	ndhD5	AP012276	747677..749140	1464	BAL28424.1	0.551522	9.25763	10.2539	9.25763	21	21	16.7856	15.5771	16.7856	43	43
1075	mrpC_2	AP012276	749252..749602	351	BAL28425.1	1.07553	36.7743	40.7319	36.7743	20	20	34.1918	31.73	34.1918	21	21
1076	ndhD6	AP012276	749652..751139	1488	BAL28426.1	1.10176	34.6983	38.4326	34.6983	80	80	31.4935	29.226	31.4935	82	82
1077	slr2010	AP012276	751136..751528	393	BAL28427.1	0.658762	34.4864	38.1978	34.4864	21	21	52.3504	48.5812	52.3504	36	36
1078	ssr3409	AP012276	751483..751776	294	BAL28428.1	0.736504	32.928	36.4717	32.928	15	15	44.7085	41.4896	44.7085	23	23
1079	ssr3410	AP012276	751773..752069	297	BAL28429.1	0.322659	8.69211	9.62755	8.69211	4	4	26.939	24.9994	26.939	14	14
1080	slr2011	AP012276	752038..752637	600	BAL28430.1	1.25961	31.1938	34.5509	31.1938	29	29	24.7646	22.9816	24.7646	26	26
1081	mrpB	AP012276	752634..753281	648	BAL28431.1	2.02334	42.8267	47.4357	42.8267	43	43	21.1664	19.6424	21.1664	24	24
1082	slr2013	AP012276	753529..754836	1308	BAL28432.1	0.909312	30.5918	33.8841	30.5918	62	62	33.6429	31.2206	33.6429	77	77
1083	sll1924	AP012276	complement(754979..755704)	726	BAL28433.1	0.711954	25.78	28.5544	25.78	29	29	36.2102	33.6031	36.2102	46	46
1084	slr2015	AP012276	756155..757297	1143	BAL28434.1	1.61329	90.3432	100.066	90.3432	160	160	55.9992	51.9673	55.9992	112	112
1085	slr2016	AP012276	757346..757822	477	BAL28435.1	1.47836	97.4172	107.901	97.4172	72	72	65.8953	61.1509	65.8953	55	55
1086	slr2017	AP012276	757773..758855	1083	BAL28436.1	1.68002	143.618	159.075	143.618	241	241	85.4863	79.3314	85.4863	162	162
1087	slr2018	AP012276	758931..761330	2400	BAL28437.1	1.62814	126.389	139.991	126.389	470	470	77.6276	72.0385	77.6276	326	326
1088	slr2019	AP012276	761584..763365	1782	BAL28438.1	1.00165	36.9415	40.9171	36.9415	102	102	36.8808	34.2254	36.8808	115	115
1089	sll1921	AP012276	complement(763419..764174)	756	BAL28439.1	0.597868	61.4656	68.0805	61.4656	72	72	102.808	95.406	102.808	136	136
1090	sll1920	AP012276	complement(764403..766640)	2238	BAL28440.1	1.2975	31.1448	34.4966	31.1448	108	108	24.0037	22.2754	24.0037	94	94
1091	fabD	AP012276	766829..767710	882	BAL28441.1	0.268882	36.5867	40.5241	36.5867	50	50	136.069	126.273	136.069	210	210
1092	slr2024	AP012276	767992..768534	543	BAL28442.1	0.423999	123.61	136.913	123.61	104	104	291.534	270.544	291.534	277	277
1093	slr2025	AP012276	768601..769062	462	BAL28443.1	0.412693	180.206	199.6	180.206	129	129	436.659	405.22	436.659	353	353
1094	hemN_1	AP012276	complement(769155..770393)	1239	BAL28444.1	0.727775	30.2119	33.4633	30.2119	58	58	41.5127	38.5239	41.5127	90	90
1095	nadD	AP012276	complement(770390..770992)	603	BAL28445.1	0.297186	10.703	11.8548	10.703	10	10	36.0144	33.4214	36.0144	38	38
1096	sll1915	AP012276	complement(771032..771583)	552	BAL28446.1	0.650579	61.9667	68.6355	61.9667	53	53	95.2486	88.3909	95.2486	92	92
1097	folP	AP012276	771753..772622	870	BAL28447.1	0.737813	36.3495	40.2614	36.3495	49	49	49.2665	45.7194	49.2665	75	75
1098	slr2027	AP012276	772613..774007	1395	BAL28448.1	0.71037	18.0431	19.9849	18.0431	39	39	25.3996	23.5709	25.3996	62	62
1099	sll1913	AP012276	complement(773929..775728)	1800	BAL28449.1	0.57334	11.8321	13.1055	11.8321	33	33	20.6372	19.1514	20.6372	65	65
1100	sll1912	AP012276	complement(775789..776163)	375	BAL28450.1	0.282327	10.3262	11.4375	10.3262	6	6	36.5755	33.9421	36.5755	24	24
1101	ssl3615	AP012276	complement(776160..776444)	285	BAL28451.1	0.426627	38.4969	42.6399	38.4969	17	17	90.2355	83.7387	90.2355	45	45
1102	sll1911	AP012276	complement(776653..777039)	387	BAL28452.1	0.247372	38.3565	42.4844	38.3565	23	23	155.056	143.892	155.056	105	105
1103	zam	AP012276	complement(777168..779513)	2346	BAL28453.1	0.793673	55.2955	61.2464	55.2955	201	201	69.6703	64.6542	69.6703	286	286
1104	slr2030	AP012276	780195..781550	1356	BAL28454.1	0.645318	26.6532	29.5216	26.6532	56	56	41.3025	38.3288	41.3025	98	98
1105	slr2031	AP012276	781755..783113	1359	BAL28455.1	1.43477	73.6095	81.5313	73.6095	155	155	51.3039	47.6101	51.3039	122	122
1106	argH	AP012276	783481..784866	1386	BAL28456.1	0.478013	37.2519	41.2609	37.2519	80	80	77.9307	72.3198	77.9307	189	189
1107	slr1134	AP012276	784871..785317	447	BAL28457.1	0.713246	17.3259	19.1905	17.3259	12	12	24.2916	22.5426	24.2916	19	19
1108	slr1135	AP012276	785767..787914	2148	BAL28458.1	0.131752	2.10322	2.32957	2.10322	7	7	15.9635	14.8141	15.9635	60	60
1109	sll1084	AP012276	complement(787911..790508)	2598	BAL28459.1	0.733162	30.8038	34.1189	30.8038	124	124	42.015	38.99	42.015	191	191
1110	ctaC_1	AP012276	790821..791819	999	BAL28460.1	1.18965	178.306	197.495	178.306	276	276	149.881	139.09	149.881	262	262
1111	ctaD_1	AP012276	791908..793563	1656	BAL28461.1	1.18524	173.429	192.093	173.429	445	445	146.324	135.789	146.324	424	424
1112	ctaE_1	AP012276	793698..794312	615	BAL28462.1	0.726991	108.09	119.722	108.09	103	103	148.681	137.976	148.681	160	160
1113	trxA_1	AP012276	794464..794793	330	BAL28463.1	0.305218	97.7862	108.31	97.7862	50	50	320.382	297.315	320.382	185	185
1114	slr1140	AP012276	794866..796002	1137	BAL28464.1	0.231257	34.0575	37.7227	34.0575	60	60	147.271	136.668	147.271	293	293
1115	nrtD_1	AP012276	complement(796034..796834)	801	BAL28465.1	0.129064	3.22292	3.56977	3.22292	4	4	24.9715	23.1736	24.9715	35	35
1116	sll1081	AP012276	complement(796891..797733)	843	BAL28466.1	0.260609	2.29676	2.54393	2.29676	3	3	8.81304	8.17851	8.81304	13	13
1117	sll1080	AP012276	complement(797836..798894)	1059	BAL28467.1	0.4325	10.9698	12.1503	10.9698	18	18	25.3636	23.5375	25.3636	47	47
1118	hypB_1	AP012276	complement(798948..799637)	690	BAL28468.1	0.451723	7.48277	8.28806	7.48277	8	8	16.565	15.3723	16.565	20	20
1119	sll1078	AP012276	complement(799698..800060)	363	BAL28469.1	0.667317	23.1131	25.6005	23.1131	13	13	34.6359	32.1421	34.6359	22	22
1120	speB	AP012276	complement(800136..801308)	1173	BAL28470.1	0.469487	20.3575	22.5484	20.3575	37	37	43.3613	40.2393	43.3613	89	89
1121	slr1142	AP012276	801745..802254	510	BAL28471.1	0.30324	36.6986	40.6481	36.6986	29	29	121.022	112.308	121.022	108	108
1122	slr1143	AP012276	802309..803340	1032	BAL28472.1	0.435253	23.1389	25.6291	23.1389	37	37	53.162	49.3344	53.162	96	96
1123	ziaA_1	AP012276	complement(803568..806486)	2919	BAL28473.1	0.499857	11.9394	13.2243	11.9394	54	54	23.8856	22.1658	23.8856	122	122
1124	leuS	AP012276	complement(806818..809427)	2610	BAL28474.1	0.303841	42.7787	47.3825	42.7787	173	173	140.793	130.656	140.793	643	643
1125	gltS	AP012276	809552..810760	1209	BAL28475.1	0.415585	24.5557	27.1984	24.5557	46	46	59.0872	54.833	59.0872	125	125
1126	sml0011	AP012276	complement(811024..811347)	324	BAL28476.1	0.523812	1392.37	1542.21	1392.37	699	699	2658.14	2466.76	2658.14	1507	1507
1127	slr1147	AP012276	811591..812895	1305	BAL28477.1	0.557795	60.3352	66.8285	60.3352	122	122	108.167	100.379	108.167	247	247
1128	slr1148	AP012276	813130..813696	567	BAL28478.1	0.736504	17.0738	18.9113	17.0738	15	15	23.1822	21.5131	23.1822	23	23
1129	slr1149	AP012276	813901..815706	1806	BAL28479.1	0.689068	25.7298	28.4988	25.7298	72	72	37.34	34.6516	37.34	118	118
1130	slr1150	AP012276	815805..816317	513	BAL28480.1	0.384847	76.7422	85.0011	76.7422	61	61	199.409	185.052	199.409	179	179
1131	sll1072	AP012276	complement(816400..817071)	672	BAL28481.1	0.656349	65.3072	72.3356	65.3072	68	68	99.5008	92.3369	99.5008	117	117
1132	sll1071	AP012276	complement(817085..817912)	828	BAL28482.1	0.722756	62.3564	69.0672	62.3564	80	80	86.2759	80.0642	86.2759	125	125
1133	tktA	AP012276	complement(818069..820081)	2013	BAL28483.1	0.645862	652.763	723.013	652.763	2036	2036	1010.69	937.918	1010.69	3560	3560
1134	fabF_1	AP012276	complement(820204..821454)	1251	BAL28484.1	0.514195	165.603	183.426	165.603	321	321	322.064	298.876	322.064	705	705
1135	acpP	AP012276	complement(821652..821885)	234	BAL28485.1	0.230681	369.582	409.356	369.582	134	134	1602.13	1486.78	1602.13	656	656
1136	sll1068	AP012276	complement(822095..822526)	432	BAL28486.1	0.405844	34.361	38.0589	34.361	23	23	84.6654	78.5696	84.6654	64	64
1137	ssl3451	AP012276	complement(822563..822808)	246	BAL28487.1	0.301148	31.4824	34.8705	31.4824	12	12	104.541	97.0143	104.541	45	45
1138	bfr_1	AP012276	822996..823469	474	BAL28488.1	1.03251	261.423	289.558	261.423	192	192	253.192	234.963	253.192	210	210
1139	sll1825	AP012276	complement(823485..824117)	633	BAL28489.1	0.808411	133.564	147.938	133.564	131	131	165.218	153.323	165.218	183	183
1140	rpl25	AP012276	complement(824330..824887)	558	BAL28490.1	0.451176	381.682	422.758	381.682	299	330	845.971	785.063	845.971	767	826
1141	purA	AP012276	complement(824686..826017)	1332	BAL28491.1	0.355649	176.852	195.885	176.852	354	365	497.266	461.464	497.266	1126	1159
1142	ssl3446	AP012276	complement(826172..826351)	180	BAL28492.1	9.13711	319.109	353.451	319.109	89	89	34.9245	32.41	34.9245	11	11
1143	rpl31	AP012276	complement(826739..826984)	246	BAL28493.1	0.466453	398.777	441.693	398.777	152	152	854.914	793.362	854.914	368	368
1144	rps9	AP012276	complement(827037..827450)	414	BAL28494.1	0.454576	347.637	385.05	347.637	223	223	764.75	709.689	764.75	554	554
1145	rpl13	AP012276	complement(827450..827905)	456	BAL28495.1	0.455145	376.477	416.993	376.477	266	266	827.159	767.605	827.159	660	660
1146	truA	AP012276	complement(827970..828797)	828	BAL28496.1	0.560379	459.879	509.371	459.879	590	590	820.656	761.57	820.656	1189	1189
1147	rpl17	AP012276	complement(828815..829165)	351	BAL28497.1	0.543545	568.163	629.308	568.163	309	309	1045.29	970.033	1045.29	642	642
1148	rpoA	AP012276	complement(829243..830187)	945	BAL28498.1	0.417138	375.623	416.048	375.623	550	550	900.477	835.644	900.477	1489	1489
1149	rps11	AP012276	complement(830296..830688)	393	BAL28499.1	0.401677	400.7	443.823	400.7	244	244	997.565	925.742	997.565	686	686
1150	rps13	AP012276	complement(830737..831120)	384	BAL28500.1	0.362663	531.101	588.258	531.101	316	316	1464.45	1359.01	1464.45	984	984
1151	rpl36	AP012276	complement(831203..831319)	117	BAL28501.1	0.331821	656.421	727.065	656.421	119	119	1978.24	1835.81	1978.24	405	405
1152	infA	AP012276	complement(831457..831684)	228	BAL28502.1	4.18196	670.865	743.063	670.865	237	237	160.419	148.869	160.419	64	64
1153	adk_2	AP012276	complement(831804..832367)	564	BAL28503.1	0.517828	107.565	119.141	107.565	94	94	207.723	192.767	207.723	205	205
1154	secY	AP012276	complement(832493..833821)	1329	BAL28504.1	0.550501	377.812	418.472	377.812	778	778	686.306	636.893	686.306	1596	1596
1155	rpl15	AP012276	complement(833923..834366)	444	BAL28505.1	0.394495	338.684	375.133	338.684	233	233	858.525	796.712	858.525	667	667
1156	rps5	AP012276	complement(834435..834956)	522	BAL28506.1	0.451172	405.532	449.175	405.532	328	328	898.84	834.125	898.84	821	821
1157	rpl18	AP012276	complement(834996..835358)	363	BAL28507.1	0.491378	405.368	448.994	405.368	228	228	824.963	765.567	824.963	524	524
1158	rpl6	AP012276	complement(835362..835901)	540	BAL28508.1	0.456373	375.282	415.669	375.282	314	314	822.313	763.108	822.313	777	777
1159	rps8	AP012276	complement(835961..836362)	402	BAL28509.1	0.487847	463.974	513.906	463.974	289	289	951.064	882.589	951.064	669	669
1160	rpl5	AP012276	complement(836454..836996)	543	BAL28510.1	0.5224	404.111	447.601	404.111	340	340	773.566	717.87	773.566	735	735
1161	rpl24	AP012276	complement(837103..837450)	348	BAL28511.1	0.465223	472.914	523.809	472.914	255	255	1016.53	943.344	1016.53	619	619
1162	rpl14	AP012276	complement(837451..837819)	369	BAL28512.1	0.543324	423.263	468.815	423.263	242	242	779.025	722.937	779.025	503	503
1163	rps17	AP012276	complement(837843..838088)	246	BAL28513.1	0.451723	356.8	395.199	356.8	136	136	789.866	732.997	789.866	340	340
1164	rpl29	AP012276	complement(838096..838317)	222	BAL28514.1	0.61843	334.323	370.303	334.323	115	115	540.6	501.678	540.6	210	210
1165	rpl16	AP012276	complement(838320..838739)	420	BAL28515.1	0.696203	264.302	292.746	264.302	172	172	379.634	352.301	379.634	279	279
1166	rps3	AP012276	complement(838780..839502)	723	BAL28516.1	0.761054	470.429	521.056	470.429	527	527	618.128	573.624	618.128	782	782
1167	rpl22	AP012276	complement(839532..839897)	366	BAL28517.1	0.813016	675.366	748.049	675.366	383	383	830.693	770.884	830.693	532	532
1168	rps19	AP012276	complement(839913..840191)	279	BAL28518.1	0.73772	488.09	540.618	488.09	211	211	661.619	613.984	661.619	323	323
1169	rpl2	AP012276	complement(840224..841054)	831	BAL28519.1	0.721863	602.674	667.533	602.674	776	776	834.887	774.776	834.887	1214	1214
1170	rpl23	AP012276	complement(841104..841409)	306	BAL28520.1	0.894778	740.299	819.97	740.299	351	351	827.355	767.787	827.355	443	443
1171	rpl4	AP012276	complement(841402..842034)	633	BAL28521.1	0.84463	641.311	710.328	641.311	629	629	759.28	704.613	759.28	841	841
1172	rpl3	AP012276	complement(842074..842715)	642	BAL28522.1	0.660612	837.397	927.518	837.397	833	833	1267.61	1176.34	1267.61	1424	1424
1173	slr1894	AP012276	843207..843677	471	BAL28523.1	0.719508	522.066	578.251	522.066	381	381	725.588	673.347	725.588	598	598
1174	ycf21	AP012276	complement(843715..844323)	609	BAL28524.1	1.36646	128.23	142.03	128.23	121	121	93.841	87.0846	93.841	100	100
1175	slr1895	AP012276	844282..845496	1215	BAL28525.1	1.39445	75.4282	83.5457	75.4282	142	142	54.0918	50.1973	54.0918	115	115
1176	slr1896	AP012276	845584..845976	393	BAL28526.1	0.501914	26.2754	29.1031	26.2754	16	16	52.3504	48.5812	52.3504	36	36
1177	petJ	AP012276	complement(846068..846430)	363	BAL28527.1	0.963232	51.56	57.1089	51.56	29	29	53.5281	49.6742	53.5281	34	34
1178	srrA	AP012276	846611..847912	1302	BAL28528.1	0.661798	54.0303	59.845	54.0303	109	109	81.6417	75.7636	81.6417	186	186
1179	argB	AP012276	848176..849069	894	BAL28529.1	0.523905	32.486	35.9822	32.486	45	45	62.0075	57.543	62.0075	97	97
1180	ureF	AP012276	849197..849850	654	BAL28530.1	0.662651	70.0652	77.6055	70.0652	71	71	105.735	98.122	105.735	121	121
1181	slr1900	AP012276	849904..850647	744	BAL28531.1	0.665484	114.505	126.827	114.505	132	132	172.062	159.674	172.062	224	224
1182	slr1901	AP012276	850707..851687	981	BAL28532.1	0.365364	21.7103	24.0468	21.7103	33	33	59.4211	55.1429	59.4211	102	102
1183	slr1902	AP012276	851819..852244	426	BAL28533.1	0.411726	53.0249	58.7314	53.0249	34	35	128.787	119.514	128.787	94	96
1184	slr1903	AP012276	852133..852549	417	BAL28534.1	0.491003	46.4309	51.4277	46.4309	27	30	94.5634	87.7549	94.5634	67	69
1185	sll1792	AP012276	complement(852572..853000)	429	BAL28535.1	1.12931	22.5661	24.9946	22.5661	9	15	19.9822	18.5435	19.9822	11	15
1186	sll1791	AP012276	complement(852997..853383)	387	BAL28536.1	2.00766	26.6828	29.5543	26.6828	12	16	13.2905	12.3336	13.2905	7	9
1187	rpoC2	AP012276	complement(853599..857552)	3954	BAL28537.1	0.579104	179.873	199.231	179.873	1102	1102	310.606	288.243	310.606	2149	2149
1188	rpoB	AP012276	complement(857660..860968)	3309	BAL28538.1	0.441115	194.65	215.599	194.65	998	998	441.27	409.499	441.27	2555	2555
1189	sll1786	AP012276	complement(861054..861839)	786	BAL28539.1	0.460941	312.02	345.6	312.02	380	380	676.919	628.182	676.919	931	931
1190	rps20	AP012276	complement(861975..862268)	294	BAL28540.1	0.436978	897.837	994.462	897.837	409	409	2054.65	1906.72	2054.65	1057	1057
1191	sll1124	AP012276	complement(862364..866479)	4116	BAL28541.1	0.64627	30.4192	33.6929	30.4192	194	194	47.0689	43.68	47.0689	339	339
1192	sll1123	AP012276	complement(866476..867246)	771	BAL28542.1	1.27502	58.5956	64.9017	58.5956	70	70	45.9565	42.6477	45.9565	62	62
1193	sll1121	AP012276	complement(867359..869671)	2313	BAL28543.1	1.59313	22.0431	24.4154	22.0431	79	79	13.8364	12.8402	13.8364	56	56
1194	sll1120	AP012276	complement(869770..873372)	3603	BAL28544.1	0.829211	18.8082	20.8323	18.8082	105	105	22.682	21.0489	22.682	143	143
1195	sll1119	AP012276	complement(873567..874652)	1086	BAL28545.1	0.359325	8.31993	9.21532	8.31993	14	14	23.1544	21.4873	23.1544	44	44
1196	slr1194	AP012276	874795..875463	669	BAL28546.1	1.03216	164	181.65	164	170	170	158.89	147.45	158.89	186	186
1197	slr1195	AP012276	875617..876081	465	BAL28547.1	0.455094	37.4742	41.5072	37.4742	27	27	82.344	76.4153	82.344	67	67
1198	slr1196	AP012276	876110..877399	1290	BAL28548.1	0.623066	40.0241	44.3315	40.0241	80	80	64.2374	59.6124	64.2374	145	145
1199	slr1197	AP012276	877427..878623	1197	BAL28549.1	0.514238	27.4978	30.4571	27.4978	51	51	53.4729	49.6229	53.4729	112	112
1200	sll1118	AP012276	complement(878666..878992)	327	BAL28550.1	0.724461	67.1047	74.3264	67.1047	34	34	92.6271	85.9581	92.6271	53	53
1201	ssr2009	AP012276	879039..879311	273	BAL28551.1	0.347479	18.9125	20.9479	18.9125	8	8	54.4278	50.5091	54.4278	26	26
1202	slr1198	AP012276	879510..880145	636	BAL28552.1	0.350369	813.84	901.425	813.84	802	802	2322.81	2155.57	2322.81	2585	2585
1203	mutL	AP012276	880249..881940	1692	BAL28553.1	0.856087	17.9275	19.8568	17.9275	47	47	20.9412	19.4334	20.9412	62	62
1204	livH	AP012276	882125..883291	1167	BAL28554.1	0.099762	13.8258	15.3137	13.8258	25	25	138.588	128.61	138.588	283	283
1205	slr1201	AP012276	883389..884621	1233	BAL28555.1	0.235611	15.1795	16.8131	15.1795	29	29	64.4261	59.7875	64.4261	139	139
1206	lacF	AP012276	884737..885633	897	BAL28556.1	0.515856	26.6214	29.4864	26.6214	37	37	51.6063	47.8907	51.6063	81	81
1207	slr1203	AP012276	885743..886180	438	BAL28557.1	0.741107	30.9433	34.2734	30.9433	21	21	41.7528	38.7467	41.7528	32	32
1208	htrA	AP012276	886385..887644	1260	BAL28558.1	0.915255	63.5145	70.3499	63.5145	124	124	69.3954	64.399	69.3954	153	153
1209	slr1205	AP012276	887833..888186	354	BAL28559.1	0.40965	134.912	149.431	134.912	74	74	329.334	305.623	329.334	204	204
1210	slr1206	AP012276	888460..889095	636	BAL28560.1	0.689068	36.5315	40.463	36.5315	36	36	53.0157	49.1987	53.0157	59	59
1211	slr1207	AP012276	889163..890707	1545	BAL28561.1	0.894758	43.0259	47.6564	43.0259	103	103	48.0867	44.6245	48.0867	130	130
1212	ssr2016	AP012276	890929..891126	198	BAL28562.1	0.752871	13.0382	14.4413	13.0382	4	4	17.3179	16.0711	17.3179	6	6
1213	slr1208	AP012276	891378..893351	1974	BAL28563.1	1.00611	32.0406	35.4888	32.0406	98	98	31.846	29.5532	31.846	110	110
1214	slr1209	AP012276	893363..893692	330	BAL28564.1	0.256661	9.77862	10.831	9.77862	5	5	38.0994	35.3563	38.0994	22	22
1215	slr1210	AP012276	893685..894074	390	BAL28565.1	0.294602	9.92906	10.9976	9.92906	6	6	33.7034	31.2768	33.7034	23	23
1216	cobN_1	AP012276	894086..897364	3279	BAL28566.1	0.379858	7.28252	8.06626	7.28252	37	37	19.1717	17.7914	19.1717	110	110
1217	ETR1	AP012276	897456..899990	2535	BAL28567.1	0.912727	15.0209	16.6374	15.0209	59	59	16.4572	15.2723	16.4572	73	73
1218	slr1213	AP012276	900039..900764	726	BAL28568.1	0.584819	25.78	28.5544	25.78	29	29	44.082	40.9082	44.082	56	56
1219	slr1214	AP012276	901299..902417	1119	BAL28569.1	0.451723	14.9956	16.6095	14.9956	26	26	33.1966	30.8065	33.1966	65	65
1220	slr1215	AP012276	902489..903157	669	BAL28570.1	0.55647	32.8	36.33	32.8	34	34	58.9431	54.6993	58.9431	69	69
1221	aroQ	AP012276	complement(903250..903708)	459	BAL28571.1	0.833536	217.942	241.397	217.942	155	155	261.467	242.642	261.467	210	210
1222	mgtE	AP012276	904217..905608	1392	BAL28572.1	0.350172	18.5457	20.5415	18.5457	40	40	52.9615	49.1484	52.9615	129	129
1223	sll1971	AP012276	complement(905677..906891)	1215	BAL28573.1	0.611708	20.7162	22.9457	20.7162	39	39	33.8662	31.4279	33.8662	72	72
1224	slr2070	AP012276	907074..907928	855	BAL28574.1	0.68075	97.3745	107.854	97.3745	129	129	143.04	132.741	143.04	214	214
1225	slr2071	AP012276	908092..908415	324	BAL28575.1	0.752871	59.7582	66.1894	59.7582	30	30	79.3738	73.659	79.3738	45	45
1226	sll1969	AP012276	complement(908455..909063)	609	BAL28576.1	1.02343	30.7328	34.0403	30.7328	29	29	30.0291	27.8671	30.0291	32	32
1227	pmgA	AP012276	complement(909070..909585)	516	BAL28577.1	0.774381	60.0362	66.4973	60.0362	48	48	77.5279	71.946	77.5279	70	70
1228	sll1967	AP012276	complement(909705..911096)	1392	BAL28578.1	0.898588	34.3095	38.0018	34.3095	74	74	38.1816	35.4325	38.1816	93	93
1229	ilvA	AP012276	911459..912985	1527	BAL28579.1	0.816945	28.7403	31.8333	28.7403	68	68	35.1802	32.6473	35.1802	94	94
1230	slr2073	AP012276	913398..913958	561	BAL28580.1	0.509237	1395.47	1545.65	1395.47	1213	1213	2740.31	2543.01	2740.31	2690	2690
1231	manA	AP012276	914154..914543	390	BAL28581.1	0.722015	64.5389	71.4845	64.5389	39	39	89.3871	82.9514	89.3871	61	61
1232	sll1965	AP012276	complement(914882..915292)	411	BAL28582.1	0.551522	32.9761	36.525	32.9761	21	21	59.7911	55.4862	59.7911	43	43
1233	groES	AP012276	915406..915726	321	BAL28583.1	0.108363	243.277	269.459	243.277	121	121	2245.02	2083.38	2245.02	1261	1261
1234	groEL	AP012276	915823..917448	1626	BAL28584.1	0.156569	333.808	369.733	333.808	841	841	2132.02	1978.52	2132.02	6066	6066
1235	slr2077	AP012276	917918..920116	2199	BAL28585.1	0.248447	3.22841	3.57585	3.22841	11	11	12.9944	12.0588	12.9944	50	50
1236	slr2078	AP012276	920433..921017	585	BAL28586.1	0.631083	20.9614	23.2172	20.9614	19	19	33.2149	30.8235	33.2149	34	34
1237	ssl3712	AP012276	complement(921044..921298)	255	BAL28587.1	0.524321	32.9022	36.4431	32.9022	13	13	62.752	58.234	62.752	28	28
1238	aroC	AP012276	complement(921651..922739)	1089	BAL28588.1	0.415186	44.4483	49.2318	44.4483	75	75	107.056	99.3484	107.056	204	204
1239	rpl12	AP012276	complement(922946..923332)	387	BAL28589.1	0.416876	1524.25	1688.29	1524.25	914	914	3656.36	3393.11	3656.36	2476	2476
1240	rpl10	AP012276	complement(923420..923941)	522	BAL28590.1	0.452377	1708.67	1892.56	1708.67	1382	1382	3777.1	3505.15	3777.1	3450	3450
1241	rpl1	AP012276	complement(924188..924904)	717	BAL28591.1	0.537558	1000.04	1107.66	1000.04	1111	1111	1860.34	1726.4	1860.34	2334	2334
1242	rpl11	AP012276	complement(924991..925416)	426	BAL28592.1	0.387023	498.434	552.075	498.434	329	329	1287.87	1195.14	1287.87	960	960
1243	nusG	AP012276	complement(925518..926135)	618	BAL28593.1	0.730093	423.993	469.623	423.993	406	406	580.739	538.927	580.739	628	628
1244	secE	AP012276	complement(926415..926660)	246	BAL28594.1	0.782607	1012.68	1121.67	1012.68	386	386	1293.99	1200.82	1293.99	557	557
1245	rpl19	AP012276	complement(926962..927330)	369	BAL28595.1	0.530083	844.778	935.692	844.778	483	483	1593.67	1478.93	1593.67	1029	1029
1246	slr1826	AP012276	927435..927860	426	BAL28596.1	0.757636	80.2949	88.9362	80.2949	53	53	105.981	98.3504	105.981	79	79
1247	slr1827	AP012276	928061..928852	792	BAL28597.1	0.330105	15.4828	17.1491	15.4828	19	19	46.9027	43.5258	46.9027	65	65
1248	sll1739	AP012276	complement(928908..929987)	1080	BAL28598.1	0.533713	41.2332	45.6707	41.2332	69	69	77.2572	71.6948	77.2572	146	146
1249	sll1738	AP012276	complement(930250..930945)	696	BAL28599.1	0.415293	52.8551	58.5434	52.8551	57	57	127.272	118.108	127.272	155	155
1250	sll1737	AP012276	complement(931009..931491)	483	BAL28600.1	0.397465	84.1812	93.2407	84.1812	63	63	211.795	196.546	211.795	179	179
1251	petF_1	AP012276	931741..932061	321	BAL28601.1	0.234458	120.633	133.616	120.633	60	60	514.52	477.476	514.52	289	289
1252	slr1829	AP012276	932173..933165	993	BAL28602.1	0.84698	122.838	136.058	122.838	189	189	145.031	134.589	145.031	252	252
1253	phbC	AP012276	933259..934395	1137	BAL28603.1	1.11813	56.7624	62.8712	56.7624	100	100	50.7657	47.1107	50.7657	101	101
1254	sll1736	AP012276	complement(934426..934809)	384	BAL28604.1	0.982005	134.456	148.926	134.456	80	80	136.92	127.062	136.92	92	92
1255	sll1735	AP012276	complement(934937..935338)	402	BAL28605.1	0.244402	46.5579	51.5685	46.5579	29	29	190.497	176.782	190.497	134	134
1256	sll1734	AP012276	complement(935511..936806)	1296	BAL28606.1	0.38615	26.3932	29.2336	26.3932	53	53	68.3497	63.4286	68.3497	155	155
1257	ndhD3	AP012276	complement(936870..938378)	1509	BAL28607.1	0.631646	28.2278	31.2656	28.2278	66	66	44.6892	41.4717	44.6892	118	118
1258	ndhF3	AP012276	complement(938495..940342)	1848	BAL28608.1	0.75093	45.0515	49.8999	45.0515	129	129	59.9942	55.6748	59.9942	194	194
1259	sll1730	AP012276	complement(940740..941372)	633	BAL28609.1	1.17037	116.231	128.74	116.231	114	114	99.3113	92.1611	99.3113	110	110
1260	psaA	AP012276	941788..944043	2256	BAL28610.1	1.79584	18165.6	20120.6	18165.6	63499	63499	10115.4	9387.06	10115.4	39931	39931
1261	psaB	AP012276	944289..946484	2196	BAL28611.1	1.9639	15814.7	17516.6	15814.7	53811	53811	8052.67	7472.89	8052.67	30943	30943
1262	sll1726	AP012276	complement(946624..947613)	990	BAL28612.1	1.02425	25.4244	28.1606	25.4244	39	39	24.8224	23.0352	24.8224	43	43
1263	sll1725	AP012276	complement(947613..949445)	1833	BAL28613.1	0.483988	14.788	16.3794	14.788	42	42	30.5544	28.3545	30.5544	98	98
1264	icsA	AP012276	complement(949499..950638)	1140	BAL28614.1	0.766315	10.7565	11.9141	10.7565	19	19	14.0366	13.026	14.0366	28	28
1265	sll1723	AP012276	complement(950635..951876)	1242	BAL28615.1	0.546439	15.5891	17.2668	15.5891	30	30	28.5286	26.4746	28.5286	62	62
1266	sll1722	AP012276	complement(951899..953200)	1302	BAL28616.1	0.618947	28.2544	31.2951	28.2544	57	57	45.6491	42.3624	45.6491	104	104
1267	slr1837	AP012276	953854..954558	705	BAL28617.1	0.755701	81.4746	90.2429	81.4746	89	89	107.813	100.051	107.813	133	133
1268	pdhB	AP012276	complement(954555..955529)	975	BAL28618.1	0.465839	131.064	145.169	131.064	198	198	281.35	261.093	281.35	480	480
1269	ccmK_1	AP012276	955907..956218	312	BAL28619.1	0.496686	196.513	217.661	196.513	95	95	395.648	367.162	395.648	216	216
1270	ccmK_2	AP012276	956377..956715	339	BAL28620.1	0.540103	314.127	347.934	314.127	165	165	581.606	539.732	581.606	345	345
1271	slr1840	AP012276	956775..957890	1116	BAL28621.1	0.430212	37.0116	40.9947	37.0116	64	64	86.031	79.8369	86.031	168	168
1272	slr1841	AP012276	958239..960131	1893	BAL28622.1	1.27038	12526.3	13874.3	12526.3	36741	36741	9860.27	9150.34	9860.27	32661	32661
1273	cysK	AP012276	960258..961196	939	BAL28623.1	0.269685	21.9941	24.3611	21.9941	32	32	81.5547	75.6829	81.5547	134	134
1274	zwf	AP012276	961303..962832	1530	BAL28624.1	0.592197	108.83	120.543	108.83	258	258	183.774	170.542	183.774	492	492
1275	uvrA	AP012276	962990..965902	2913	BAL28625.1	0.34927	13.2933	14.7239	13.2933	60	60	38.0602	35.3199	38.0602	194	194
1276	sll1717	AP012276	complement(966040..967575)	1536	BAL28626.1	0.225861	8.82368	9.77328	8.82368	21	21	39.0668	36.2541	39.0668	105	105
1277	sll1716	AP012276	complement(967669..968454)	786	BAL28627.1	1.24818	17.2432	19.0989	17.2432	8	21	13.8147	12.82	13.8147	13	19
1278	sll1715	AP012276	complement(968589..969062)	474	BAL28628.1	0.451723	13.6158	15.0811	13.6158	10	10	30.142	27.9718	30.142	25	25
1279	sll1714	AP012276	complement(968995..969396)	402	BAL28629.1	0.188218	4.81634	5.33467	4.81634	3	3	25.5892	23.7468	25.5892	18	18
1280	hisC_1	AP012276	complement(969864..970970)	1107	BAL28630.1	0.407291	89.7831	99.4455	89.7831	154	154	220.44	204.569	220.44	427	427
1281	hupA	AP012276	complement(970984..971286)	303	BAL28631.1	0.423881	1154.46	1278.7	1154.46	542	542	2723.54	2527.45	2723.54	1444	1444
1282	sll1469	AP012276	complement(971562..972419)	858	BAL28632.1	0.83212	21.0616	23.3283	21.0616	28	28	25.3108	23.4885	25.3108	38	38
1283	slr1535	AP012276	972587..974056	1470	BAL28633.1	0.706119	128.2	141.997	128.2	292	292	181.555	168.484	181.555	467	467
1284	recQ	AP012276	974155..975591	1437	BAL28634.1	0.789897	57.4877	63.6745	57.4877	128	128	72.7787	67.5387	72.7787	183	183
1285	slr1537	AP012276	975881..976750	870	BAL28635.1	0.634268	30.4149	33.6881	30.4149	41	41	47.9527	44.5002	47.9527	73	73
1286	cbiD	AP012276	976850..977944	1095	BAL28636.1	0.436323	10.0197	11.0981	10.0197	17	17	22.964	21.3107	22.964	44	44
1287	slr1540	AP012276	978034..978969	936	BAL28637.1	0.633019	86.1898	95.4655	86.1898	125	125	136.157	126.354	136.157	223	223
1288	slr1541	AP012276	979043..979675	633	BAL28638.1	0.774381	48.9395	54.2063	48.9395	48	48	63.1981	58.648	63.1981	70	70
1289	ispF	AP012276	979787..980272	486	BAL28639.1	0.451723	18.5915	20.5923	18.5915	14	14	41.1568	38.1936	41.1568	35	35
1290	slr1543	AP012276	980378..981796	1419	BAL28640.1	0.51237	22.2862	24.6846	22.2862	49	49	43.4962	40.3645	43.4962	108	108
1291	bhy	AP012276	complement(981793..982731)	939	BAL28641.1	0.349607	95.5368	105.818	95.5368	139	139	273.269	253.594	273.269	449	449
1292	ssr2595	AP012276	983070..983282	213	BAL28642.1	1.85529	209.07	231.57	209.07	69	69	112.688	104.575	112.688	42	42
1293	slr1544	AP012276	983331..983642	312	BAL28643.1	2.29894	117.908	130.597	117.908	57	57	51.2877	47.5951	51.2877	28	28
1294	rpoE_1	AP012276	983906..984577	672	BAL28644.1	1.36446	3104.01	3438.07	3104.01	3232	3232	2274.91	2111.12	2274.91	2675	2675
1295	slr1546	AP012276	984664..985302	639	BAL28645.1	1.28431	527.219	583.958	527.219	522	522	410.508	380.952	410.508	459	459
1296	slr1547	AP012276	985326..986324	999	BAL28646.1	1.01892	77.5242	85.8673	77.5242	120	120	76.0845	70.6065	76.0845	133	133
1297	sll1466	AP012276	complement(986594..987835)	1242	BAL28647.1	0.436146	29.0997	32.2314	29.0997	56	56	66.72	61.9163	66.72	145	145
1298	ssl2823	AP012276	complement(987842..988069)	228	BAL28648.1	0.376435	31.1372	34.4882	31.1372	11	11	82.7159	76.7605	82.7159	33	33
1299	sll1464	AP012276	complement(988174..989607)	1434	BAL28649.1	0.521218	27.0037	29.9099	27.0037	60	60	51.8089	48.0787	51.8089	130	130
1300	ftsH_3	AP012276	complement(989819..991705)	1887	BAL28650.1	2.03605	168.957	187.14	168.957	494	494	82.9829	77.0082	82.9829	274	274
1301	hypE	AP012276	complement(991837..992874)	1038	BAL28651.1	0.858909	33.5752	37.1885	33.5752	54	54	39.0905	36.276	39.0905	71	71
1302	sll1461	AP012276	complement(992923..993585)	663	BAL28652.1	0.83998	87.6094	97.0378	87.6094	90	90	104.299	96.79	104.299	121	121
1303	surE_1	AP012276	complement(993638..994315)	678	BAL28653.1	0.720137	41.8837	46.3912	41.8837	44	44	58.1606	53.9732	58.1606	69	69
1304	def	AP012276	994445..995008	564	BAL28654.1	0.916914	202.542	224.34	202.542	177	177	220.896	204.992	220.896	218	218
1305	ssr2611	AP012276	995124..995321	198	BAL28655.1	0.383964	110.824	122.751	110.824	34	34	288.632	267.851	288.632	100	100
1306	lysS	AP012276	995377..996909	1533	BAL28656.1	0.290393	26.5228	29.3772	26.5228	63	63	91.3343	84.7584	91.3343	245	245
1307	rfbJ	AP012276	complement(996952..997908)	957	BAL28657.1	0.113599	11.4646	12.6984	11.4646	17	17	100.922	93.6555	100.922	169	169
1308	sll1456	AP012276	complement(998112..999020)	909	BAL28658.1	0.195578	22.01	24.3787	22.01	31	31	112.538	104.435	112.538	179	179
1309	slr1552	AP012276	999131..1001665	2535	BAL28659.1	0.140557	7.38315	8.17772	7.38315	29	29	52.5276	48.7457	52.5276	233	233
1310	sll1455	AP012276	complement(1001741..1002208)	468	BAL28660.1	0.0842766	6.89518	7.63724	6.89518	5	5	81.8161	75.9255	81.8161	67	67
1311	narB	AP012276	complement(1002735..1004879)	2145	BAL28661.1	0.184377	16.8493	18.6626	16.8493	56	56	91.3854	84.8058	91.3854	343	343
1312	nrtD_2	AP012276	complement(1005283..1006281)	999	BAL28662.1	0.230718	73.648	81.574	73.648	114	114	319.212	296.229	319.212	558	558
1313	nrtC_1	AP012276	complement(1006336..1008348)	2013	BAL28663.1	0.33847	100.992	111.861	100.992	315	315	298.379	276.897	298.379	1051	1051
1314	nrtB	AP012276	complement(1008423..1009250)	828	BAL28664.1	0.264542	92.7552	102.737	92.7552	119	119	350.625	325.381	350.625	508	508
1315	nrtA	AP012276	complement(1009336..1010676)	1341	BAL28665.1	0.174086	92.886	102.882	92.886	193	193	533.563	495.147	533.563	1252	1252
1316	sll1634	AP012276	complement(1010812..1011861)	1050	BAL28666.1	0.509565	22.7423	25.1898	22.7423	37	37	44.6308	41.4174	44.6308	82	82
1317	slr1748	AP012276	1012077..1012721	645	BAL28667.1	0.231805	78.047	86.4464	78.047	78	78	336.693	312.451	336.693	380	380
1318	repA	AP012276	complement(1012718..1012990)	273	BAL28668.1	0.135764	156.028	172.82	156.028	66	66	1149.26	1066.52	1149.26	549	549
1319	ftsZ	AP012276	complement(1013147..1014439)	1293	BAL28669.1	0.711218	303.977	336.691	303.977	609	609	427.403	396.631	427.403	967	967
1320	sll1632	AP012276	complement(1014689..1015498)	810	BAL28670.1	0.782511	70.1163	77.6622	70.1163	88	88	89.6042	83.1529	89.6042	127	127
1321	prc	AP012276	1015613..1016884	1272	BAL28671.1	1.72586	548.987	608.068	548.987	1082	1082	318.094	295.192	318.094	708	708
1322	slr1752	AP012276	1016932..1017597	666	BAL28672.1	1.27324	222.882	246.869	222.882	230	230	175.051	162.448	175.051	204	204
1323	mraW	AP012276	complement(1017702..1018595)	894	BAL28673.1	1.08352	51.2557	56.7718	51.2557	71	71	47.3047	43.8988	47.3047	74	74
1324	slr1218	AP012276	1018752..1019228	477	BAL28674.1	0.469711	63.5918	70.4355	63.5918	47	47	135.385	125.637	135.385	113	113
1325	ureE	AP012276	1019257..1019685	429	BAL28675.1	0.537765	15.044	16.6631	15.044	10	10	27.9751	25.9609	27.9751	21	21
1326	slr1220	AP012276	1019910..1020863	954	BAL28676.1	0.59164	192.805	213.554	192.805	285	285	325.882	302.419	325.882	544	544
1327	slr1222	AP012276	1021523..1022110	588	BAL28677.1	0.317617	29.6352	32.8245	29.6352	27	27	93.3048	86.587	93.3048	96	96
1328	uvrD	AP012276	complement(1022380..1024761)	2382	BAL28678.1	0.564653	42.2673	46.8161	42.2673	156	156	74.8553	69.4659	74.8553	312	312
1329	sll1142	AP012276	complement(1024927..1025448)	522	BAL28679.1	1.02002	69.2371	76.6884	69.2371	56	56	67.8783	62.9912	67.8783	62	62
1330	sulA	AP012276	1025621..1026544	924	BAL28680.1	0.603595	21.6527	23.9829	21.6527	31	31	35.8728	33.2901	35.8728	58	58
1331	malK	AP012276	1026613..1027839	1227	BAL28681.1	0.564653	34.7153	38.4513	34.7153	66	66	61.4808	57.0542	61.4808	132	132
1332	pknA_1	AP012276	1027946..1029433	1488	BAL28682.1	0.573081	29.4936	32.6677	29.4936	68	68	51.465	47.7596	51.465	134	134
1333	sll1138	AP012276	complement(1029439..1030185)	747	BAL28683.1	1.26217	32.831	36.3643	32.831	38	38	26.0117	24.1389	26.0117	34	34
1334	purC	AP012276	1030345..1031091	747	BAL28684.1	0.466353	88.1254	97.6094	88.1254	102	102	188.967	175.362	188.967	247	247
1335	IAP75	AP012276	1031304..1033889	2586	BAL28685.1	0.633335	130.026	144.02	130.026	521	521	205.304	190.522	205.304	929	929
1336	prfC	AP012276	1034004..1035647	1644	BAL28686.1	0.881302	78.1219	86.5293	78.1219	199	199	88.6438	82.2616	88.6438	255	255
1337	slr1229	AP012276	1035695..1037191	1497	BAL28687.1	0.149467	3.88009	4.29767	3.88009	9	9	25.9595	24.0905	25.9595	68	68
1338	slr1230	AP012276	1037291..1038154	864	BAL28688.1	0.235272	3.73489	4.13684	3.73489	5	5	15.8748	14.7318	15.8748	24	24
1339	sll1135	AP012276	complement(1038140..1039144)	1005	BAL28689.1	1.08021	14.1279	15.6484	14.1279	22	22	13.0789	12.1373	13.0789	23	23
1340	slr1232	AP012276	1039298..1039834	537	BAL28690.1	0.654998	34.8534	38.6043	34.8534	29	29	53.2115	49.3804	53.2115	50	50
1341	ssr2047	AP012276	1040194..1040457	264	BAL28691.1	0.537109	95.3416	105.602	95.3416	39	39	177.509	164.728	177.509	82	82
1342	frdA	AP012276	1040633..1042360	1728	BAL28692.1	1.26524	45.1922	50.0557	45.1922	121	121	35.7182	33.1466	35.7182	108	108
1343	ssr2049	AP012276	1042492..1042659	168	BAL28693.1	0.326244	49.9408	55.3154	49.9408	13	13	153.078	142.057	153.078	45	45
1344	slr1234	AP012276	1042711..1043055	345	BAL28694.1	0.350914	102.888	113.961	102.888	55	55	293.2	272.09	293.2	177	177
1345	slr1235	AP012276	1043101..1043982	882	BAL28695.1	0.420826	57.807	64.0281	57.807	79	79	137.365	127.475	137.365	212	212
1346	slr1236	AP012276	1044019..1044552	534	BAL28696.1	0.587239	314.234	348.052	314.234	260	260	535.104	496.578	535.104	500	500
1347	ssl2250	AP012276	complement(1044619..1044795)	177	BAL28697.1	0.0393406	61.9865	68.6575	61.9865	17	17	1575.64	1462.19	1575.64	488	488
1348	sll1132	AP012276	complement(1045017..1046468)	1452	BAL28698.1	0.225861	11.5566	12.8003	11.5566	26	26	51.1666	47.4827	51.1666	130	130
1349	sll1131	AP012276	complement(1046504..1046932)	429	BAL28699.1	0.279828	42.1233	46.6566	42.1233	28	28	150.533	139.695	150.533	113	113
1350	codA	AP012276	1047107..1048459	1353	BAL28700.1	0.111157	44.8386	49.6641	44.8386	94	94	403.381	374.338	403.381	955	955
1351	sll1130	AP012276	complement(1048508..1048855)	348	BAL28701.1	0.133752	179.893	199.253	179.893	97	97	1344.98	1248.14	1344.98	819	819
1352	ssl2245	AP012276	complement(1048852..1049118)	267	BAL28702.1	0.146193	263.473	291.828	263.473	109	109	1802.23	1672.47	1802.23	842	842
1353	todF	AP012276	complement(1049619..1050509)	891	BAL28703.1	1.41764	42.7362	47.3354	42.7362	59	59	30.146	27.9756	30.146	47	47
1354	ssr2060	AP012276	1050592..1050831	240	BAL28704.1	0.421097	59.1607	65.5275	59.1607	22	22	140.492	130.377	140.492	59	59
1355	grxC_1	AP012276	1050914..1051180	267	BAL28705.1	0.862066	241.719	267.732	241.719	100	100	280.395	260.207	280.395	131	131
1356	gshB	AP012276	1051261..1052223	963	BAL28706.1	1.24072	164.196	181.866	164.196	245	245	132.339	122.811	132.339	223	223
1357	ssr2062	AP012276	1052620..1052886	267	BAL28707.1	0.974528	410.922	455.145	410.922	170	170	421.662	391.303	421.662	197	197
1358	menB	AP012276	complement(1053029..1053856)	828	BAL28708.1	1.16302	107.565	119.141	107.565	138	138	92.4878	85.8288	92.4878	134	134
1359	pntA	AP012276	1054057..1055649	1593	BAL28709.1	1.55492	333.026	368.866	333.026	822	822	214.175	198.755	214.175	597	597
1360	slr1240	AP012276	1055676..1056215	540	BAL28710.1	0.74897	152.981	169.445	152.981	128	128	204.255	189.549	204.255	193	193
1361	slr1241	AP012276	1056221..1056568	348	BAL28711.1	0.958597	135.383	149.953	135.383	73	73	141.231	131.062	141.231	86	86
1362	ssr2067	AP012276	1056816..1057046	231	BAL28712.1	1.01348	97.7862	108.31	97.7862	35	35	96.4856	89.5388	96.4856	39	39
1363	pntB	AP012276	1057087..1058529	1443	BAL28713.1	1.2942	115.839	128.306	115.839	259	259	89.506	83.0617	89.506	226	226
1364	pmbA	AP012276	1058639..1059922	1284	BAL28714.1	0.237015	8.54487	9.46447	8.54487	17	17	36.052	33.4564	36.052	81	81
1365	slr1436	AP012276	1060024..1060875	852	BAL28715.1	0.408472	12.8775	14.2633	12.8775	17	17	31.5259	29.2561	31.5259	47	47
1366	slr1437	AP012276	1061003..1061341	339	BAL28716.1	1.84506	220.841	244.608	220.841	116	116	119.693	111.075	119.693	71	71
1367	slr1438	AP012276	1061344..1062213	870	BAL28717.1	1.45994	252.221	279.365	252.221	340	340	172.761	160.323	172.761	263	263
1368	ileS	AP012276	complement(1062340..1065306)	2967	BAL28718.1	0.338398	37.4139	41.4403	37.4139	172	172	110.562	102.601	110.562	574	574
1369	ssr2406	AP012276	1065500..1065724	225	BAL28719.1	0.397643	71.7099	79.4273	71.7099	25	25	180.337	167.353	180.337	71	71
1370	dnaX_1	AP012276	complement(1065762..1069112)	3351	BAL28720.1	0.658289	22.3411	24.7455	22.3411	116	116	33.9382	31.4947	33.9382	199	199
1371	slr1440	AP012276	1069280..1069711	432	BAL28721.1	1.12931	22.4093	24.821	22.4093	15	15	19.8435	18.4148	19.8435	15	15
1372	sll1359	AP012276	complement(1069768..1071804)	2037	BAL28722.1	0.772246	29.4655	32.6365	29.4655	93	93	38.1556	35.4084	38.1556	136	136
1373	sll1358	AP012276	complement(1071836..1073020)	1185	BAL28723.1	0.770245	72.4361	80.2316	72.4361	133	133	94.0429	87.272	94.0429	195	195
1374	glgP_1	AP012276	complement(1073182..1075731)	2550	BAL28724.1	1.40333	85.5457	94.7521	85.5457	338	338	60.9591	56.5701	60.9591	272	272
1375	slr1441	AP012276	1076167..1076556	390	BAL28725.1	0.141163	1.65484	1.83294	1.65484	1	1	11.7229	10.8789	11.7229	8	8
1376	sll1355	AP012276	complement(1076576..1077121)	546	BAL28726.1	1.12931	70.9219	78.5544	70.9219	60	60	62.8013	58.2797	62.8013	60	60
1377	slr1442	AP012276	1077857..1078714	858	BAL28727.1	1.70307	140.662	155.8	140.662	187	187	82.5932	76.6466	82.5932	124	124
1378	pknA_2	AP012276	1078759..1080603	1845	BAL28728.1	0.564653	16.4408	18.2102	16.4408	47	47	29.1166	27.0203	29.1166	94	94
1379	slr1444	AP012276	1080797..1081798	1002	BAL28729.1	1.25961	18.6789	20.6891	18.6789	29	29	14.8291	13.7615	14.8291	26	26
1380	ssr2422	AP012276	1081989..1082243	255	BAL28730.1	1.74529	86.0519	95.3127	86.0519	34	34	49.3052	45.7553	49.3052	22	22
1381	recJ	AP012276	complement(1082539..1084818)	2280	BAL28731.1	0.974528	48.1211	53.2999	48.1211	170	170	49.3789	45.8237	49.3789	197	197
1382	sll1353	AP012276	complement(1084859..1087855)	2997	BAL28732.1	0.63144	11.1979	12.4031	11.1979	52	52	17.734	16.4572	17.734	93	93
1383	sll1352	AP012276	complement(1087874..1089292)	1419	BAL28733.1	0.354925	10.006	11.0829	10.006	22	22	28.192	26.1622	28.192	70	70
1384	cscK	AP012276	1089502..1090425	924	BAL28734.1	1.09919	50.9885	56.4759	50.9885	73	73	46.3873	43.0475	46.3873	75	75
1385	slr1449	AP012276	1090782..1091381	600	BAL28735.1	0.462393	55.9337	61.9533	55.9337	52	52	120.966	112.256	120.966	127	127
1386	slr1450	AP012276	1091419..1091733	315	BAL28736.1	0.564653	45.0748	49.9257	45.0748	22	22	79.8274	74.08	79.8274	44	44
1387	sll1350	AP012276	complement(1091800..1092996)	1197	BAL28737.1	0.492262	18.3319	20.3047	18.3319	34	34	37.2401	34.5588	37.2401	78	78
1388	cbbZp	AP012276	complement(1093027..1093692)	666	BAL28738.1	0.370264	19.3811	21.4668	19.3811	20	20	52.3438	48.5752	52.3438	61	61
1389	sll1348	AP012276	complement(1093728..1094597)	870	BAL28739.1	0.292783	10.3856	11.5033	10.3856	14	14	35.4719	32.918	35.4719	54	54
1390	ribH	AP012276	complement(1094751..1095245)	495	BAL28740.1	0.586164	142.116	157.41	142.116	109	109	242.451	224.995	242.451	210	210
1391	psbZ_1	AP012276	complement(1095350..1095538)	189	BAL28741.1	0.457532	430.259	476.564	430.259	126	126	940.391	872.684	940.391	311	311
1392	sll1280	AP012276	complement(1095874..1096785)	912	BAL28742.1	1.07089	77.843	86.2204	77.843	110	110	72.6897	67.4562	72.6897	116	116
1393	rps1_1	AP012276	1097179..1098165	987	BAL28743.1	0.358355	505.457	559.854	505.457	773	773	1410.49	1308.94	1410.49	2436	2436
1394	slr1357	AP012276	1098425..1099273	849	BAL28744.1	0	0	0	0	0	0	7.40448	6.87137	7.40448	6	11
1395	recF	AP012276	complement(1099316..1100470)	1155	BAL28745.1	0.577785	12.2931	13.6161	12.2931	22	22	21.2763	19.7445	21.2763	43	43
1396	sll1276	AP012276	complement(1100512..1102116)	1605	BAL28746.1	0.564653	16.8887	18.7062	16.8887	42	42	29.9098	27.7564	29.9098	84	84
1397	pykF_1	AP012276	complement(1102385..1104160)	1776	BAL28747.1	0.593243	60.3235	66.8155	60.3235	166	166	101.684	94.3632	101.684	316	316
1398	slr1362	AP012276	1104348..1104749	402	BAL28748.1	0.357375	40.1361	44.4556	40.1361	25	25	112.308	104.222	112.308	79	79
1399	sll1274	AP012276	complement(1105132..1105647)	516	BAL28749.1	0.692641	57.5347	63.7265	57.5347	46	46	83.0656	77.085	83.0656	75	75
1400	slr1363	AP012276	1105768..1107270	1503	BAL28750.1	0.493766	43.3695	48.0369	43.3695	101	101	87.834	81.5101	87.834	231	231
1401	bioB	AP012276	1107344..1108432	1089	BAL28751.1	0.56231	142.235	157.542	142.235	240	240	252.947	234.735	252.947	482	482
1402	bioY	AP012276	1108416..1109069	654	BAL28752.1	0.776398	97.6965	108.211	97.6965	99	99	125.833	116.773	125.833	144	144
1403	lspA	AP012276	1109069..1109554	486	BAL28753.1	0.645318	47.8066	52.9515	47.8066	36	36	74.0822	68.7484	74.0822	63	63
1404	sll1273	AP012276	complement(1109722..1111146)	1425	BAL28754.1	0.401956	47.555	52.6728	47.555	105	105	118.309	109.791	118.309	295	295
1405	sll1272	AP012276	complement(1111287..1112057)	771	BAL28755.1	0.354454	35.9945	39.8682	35.9945	43	43	101.549	94.2377	101.549	137	137
1406	sll1271	AP012276	complement(1112633..1114351)	1719	BAL28756.1	0.343159	20.6494	22.8717	20.6494	55	55	60.1745	55.842	60.1745	181	181
1407	glnHP	AP012276	complement(1114531..1116123)	1593	BAL28757.1	0.639011	111.414	123.404	111.414	275	275	174.353	161.8	174.353	486	486
1408	ssl2501	AP012276	complement(1116462..1116731)	270	BAL28758.1	0.954173	755.344	836.634	755.344	316	316	791.622	734.626	791.622	374	374
1409	glgP_2	AP012276	1117209..1119776	2568	BAL28759.1	0.373979	102.036	113.017	102.036	406	406	272.838	253.194	272.838	1226	1226
1410	cobL	AP012276	1120018..1120611	594	BAL28760.1	0.635235	29.3359	32.493	29.3359	27	27	46.1811	42.8562	46.1811	48	48
1411	cdsA	AP012276	1120745..1121626	882	BAL28761.1	1.3838	127.322	141.024	127.322	174	174	92.0089	85.3844	92.0089	142	142
1412	sll1268	AP012276	complement(1121729..1123282)	1554	BAL28762.1	0.931117	103.412	114.541	103.412	249	249	111.062	103.066	111.062	302	302
1413	sll1267	AP012276	complement(1123543..1124133)	591	BAL28763.1	0.490091	689.07	763.228	689.07	631	631	1406	1304.77	1406	1454	1454
1414	sll1265	AP012276	complement(1124173..1130109)	5937	BAL28764.1	0.769173	37.6124	41.6602	37.6124	346	346	48.8997	45.379	48.8997	508	508
1415	sll0877	AP012276	complement(1130415..1131785)	1371	BAL28765.1	0.698707	40.4839	44.8408	40.4839	86	86	57.9412	53.7695	57.9412	139	139
1416	mscL	AP012276	1131912..1132349	438	BAL28766.1	0.729634	231.338	256.235	231.338	157	157	317.06	294.233	317.06	243	243
1417	ruvA	AP012276	complement(1132366..1133001)	636	BAL28767.1	0.943898	56.8267	62.9424	56.8267	56	56	60.2043	55.8697	60.2043	67	67
1418	sll0875	AP012276	complement(1133016..1133792)	777	BAL28768.1	0.697886	45.6839	50.6004	45.6839	55	55	65.4604	60.7474	65.4604	89	89
1419	slr0876	AP012276	1133981..1135210	1230	BAL28769.1	0.63075	87.626	97.0563	87.626	167	167	138.924	128.921	138.924	299	299
1420	ssr1480	AP012276	1135439..1135690	252	BAL28770.1	0.329367	2443.26	2706.2	2443.26	954	954	7418.05	6883.96	7418.05	3271	3271
1421	gatA	AP012276	1135818..1137269	1452	BAL28771.1	0.811581	104.453	115.695	104.453	235	235	128.704	119.437	128.704	327	327
1422	slr0878	AP012276	1137477..1138214	738	BAL28772.1	0.667317	34.1059	37.7764	34.1059	39	39	51.109	47.4292	51.109	66	66
1423	gcvH	AP012276	1138312..1138710	399	BAL28773.1	0.309215	74.4058	82.4133	74.4058	46	46	240.628	223.303	240.628	168	168
1424	slr0880	AP012276	1138804..1140576	1773	BAL28774.1	0.379068	17.4725	19.3528	17.4725	48	48	46.0932	42.7746	46.0932	143	143
1425	napC	AP012276	complement(1140599..1141762)	1164	BAL28775.1	0.198392	7.20795	7.98367	7.20795	13	13	36.3319	33.7161	36.3319	74	74
1426	ssl1633	AP012276	complement(1141905..1142117)	213	BAL28776.1	0.765014	763.559	845.733	763.559	252	252	998.098	926.237	998.098	372	372
1427	slr0881	AP012276	1142203..1142514	312	BAL28777.1	0.738929	109.633	121.432	109.633	53	53	148.368	137.686	148.368	81	81
1428	sll0872	AP012276	complement(1142603..1142995)	393	BAL28778.1	0.545741	165.863	183.713	165.863	101	101	303.923	282.041	303.923	209	209
1429	slr0882	AP012276	1143149..1144333	1185	BAL28779.1	0.204277	57.731	63.944	57.731	106	106	282.611	262.263	282.611	586	586
1430	psr	AP012276	1144830..1146275	1446	BAL28780.1	0.388778	37.4915	41.5263	37.4915	84	84	96.4343	89.4912	96.4343	244	244
1431	sll0871	AP012276	complement(1146392..1146820)	429	BAL28781.1	1.00098	58.6717	64.986	58.6717	39	39	58.6145	54.3944	58.6145	44	44
1432	gap1	AP012276	1147181..1148200	1020	BAL28782.1	0.465008	97.4411	107.928	97.4411	154	154	209.547	194.46	209.547	374	374
1433	slr0885	AP012276	1148824..1149399	576	BAL28783.1	1.1795	52.662	58.3294	52.662	47	47	44.6478	41.4332	44.6478	45	45
1434	aat	AP012276	complement(1149573..1150169)	597	BAL28784.1	0.722756	17.2969	19.1583	17.2969	16	16	23.9318	22.2088	23.9318	25	25
1435	lipA_2	AP012276	complement(1150224..1151135)	912	BAL28785.1	0.713246	16.9839	18.8117	16.9839	24	24	23.8121	22.0977	23.8121	38	38
1436	sll0867	AP012276	complement(1151241..1152533)	1293	BAL28786.1	1.25923	62.8917	69.6601	62.8917	126	126	49.9447	46.3488	49.9447	113	113
1437	fabG_1	AP012276	1152651..1153394	744	BAL28787.1	0.369399	30.361	33.6285	30.361	35	35	82.1903	76.2728	82.1903	107	107
1438	slr0887	AP012276	1153394..1154203	810	BAL28788.1	0.308961	23.1065	25.5932	23.1065	29	29	74.7878	69.4032	74.7878	106	106
1439	slr0888	AP012276	1154432..1154938	507	BAL28789.1	4.22853	633.932	702.156	633.932	498	498	149.918	139.124	149.918	133	133
1440	slr0889	AP012276	1154959..1156185	1227	BAL28790.1	2.25861	174.628	193.422	174.628	332	332	77.3167	71.75	77.3167	166	166
1441	ssr1499	AP012276	1156336..1156605	270	BAL28791.1	#DIV/0!	2.39033	2.64758	2.39033	1	1	0	0	0	0	0
1442	slr0890	AP012276	1156682..1157077	396	BAL28792.1	0.395257	11.4084	12.6362	11.4084	7	7	28.8632	26.7851	28.8632	20	20
1443	uvrC	AP012276	complement(1157131..1159011)	1881	BAL28793.1	0.576177	8.57774	9.50087	8.57774	25	25	14.8873	13.8155	14.8873	49	49
1444	amiA_2	AP012276	1159131..1160906	1776	BAL28794.1	0.47403	12.3554	13.6851	12.3554	34	34	26.0647	24.188	26.0647	81	81
1445	sll0864	AP012276	complement(1160889..1161362)	474	BAL28795.1	0.282327	2.72316	3.01623	2.72316	2	2	9.64543	8.95097	9.64543	8	8
1446	sll0863	AP012276	complement(1161543..1161944)	402	BAL28796.1	0.564653	8.02723	8.89111	8.02723	5	5	14.2162	13.1927	14.2162	10	10
1447	sll0862	AP012276	complement(1161958..1163469)	1512	BAL28797.1	0.512199	35.4281	39.2409	35.4281	83	83	69.1686	64.1886	69.1686	183	183
1448	murQ	AP012276	complement(1163523..1164440)	918	BAL28798.1	0.435873	15.4668	17.1314	15.4668	22	22	35.4848	32.9299	35.4848	57	57
1449	sll0860	AP012276	complement(1164598..1165119)	522	BAL28799.1	0.790514	34.6186	38.3442	34.6186	28	28	43.7925	40.6395	43.7925	40	40
1450	petA	AP012276	complement(1165189..1166175)	987	BAL28800.1	0.807625	385.795	427.314	385.795	590	590	477.691	443.298	477.691	825	825
1451	petC_1	AP012276	complement(1166288..1166866)	579	BAL28801.1	0.705461	552.872	612.372	552.872	496	496	783.704	727.278	783.704	794	794
1452	psbH	AP012276	complement(1167155..1167349)	195	BAL28802.1	0.451723	1244.44	1378.37	1244.44	376	376	2754.88	2556.54	2754.88	940	940
1453	psbN	AP012276	1167435..1167566	132	BAL28803.1	0.795192	581.828	644.444	581.828	119	119	731.682	679.002	731.682	169	169
1454	hliB	AP012276	complement(1167612..1167881)	270	BAL28804.1	0.929258	344.207	381.251	344.207	144	144	370.411	343.742	370.411	175	175
1455	sll1315	AP012276	complement(1168063..1169121)	1059	BAL28805.1	0.511073	37.7848	41.8512	37.7848	62	62	73.9323	68.6093	73.9323	137	137
1456	dctP	AP012276	complement(1169180..1170289)	1110	BAL28806.1	0.293269	38.9559	43.1483	38.9559	67	67	132.833	123.269	132.833	258	258
1457	slr1403	AP012276	1170673..1179723	9051	BAL28807.1	0.502894	8.12886	9.00369	8.12886	114	114	16.1642	15.0004	16.1642	256	256
1458	sll1308	AP012276	complement(1180028..1180774)	747	BAL28808.1	0.201662	8.63975	9.56955	8.63975	10	10	42.8427	39.7581	42.8427	56	56
1459	slr1406	AP012276	1181166..1181711	546	BAL28809.1	0.385894	80.3781	89.0284	80.3781	68	68	208.291	193.294	208.291	199	199
1460	slr1407	AP012276	1181818..1182687	870	BAL28810.1	0.0991958	9.64374	10.6816	9.64374	13	13	97.2193	90.2196	97.2193	148	148
1461	slr1409	AP012276	1182767..1183747	981	BAL28811.1	0.188218	13.1578	14.5738	13.1578	20	20	69.9072	64.874	69.9072	120	120
1462	slr1410	AP012276	1183762..1184766	1005	BAL28812.1	0.0862665	7.06396	7.82418	7.06396	11	11	81.8854	75.9897	81.8854	144	144
1463	sll1307	AP012276	complement(1184813..1185340)	528	BAL28813.1	0.12996	35.4475	39.2623	35.4475	29	29	272.757	253.119	272.757	252	252
1464	sll1306	AP012276	complement(1185402..1186409)	1008	BAL28814.1	0.100116	16.0067	17.7293	16.0067	25	25	159.882	148.37	159.882	282	282
1465	sll1305	AP012276	complement(1186413..1187300)	888	BAL28815.1	0.167091	21.0769	23.3452	21.0769	29	29	126.14	117.058	126.14	196	196
1466	sll1304	AP012276	complement(1187321..1188184)	864	BAL28816.1	0.146062	30.6261	33.9221	30.6261	41	41	209.679	194.583	209.679	317	317
1467	sll1785	AP012276	complement(1188181..1188987)	807	BAL28817.1	0.166619	57.5812	63.778	57.5812	72	72	345.586	320.704	345.586	488	488
1468	sll1784	AP012276	complement(1189212..1190015)	804	BAL28818.1	0.241602	105.959	117.363	105.959	132	132	438.57	406.994	438.57	617	617
1469	sll1783	AP012276	complement(1190042..1190485)	444	BAL28819.1	0.163158	74.1325	82.1106	74.1325	51	51	454.362	421.648	454.362	353	353
1470	slr1852	AP012276	1190969..1191535	567	BAL28820.1	0.0668101	70.5716	78.1665	70.5716	62	62	1056.3	980.25	1056.3	1048	1048
1471	slr1853	AP012276	1191547..1191888	342	BAL28821.1	0.0757924	37.742	41.8038	37.742	20	20	497.966	462.114	497.966	298	298
1472	slr1854	AP012276	1191958..1192554	597	BAL28822.1	0.0648825	39.999	44.3037	39.999	37	37	616.483	572.098	616.483	644	644
1473	slr1855	AP012276	1192587..1194410	1824	BAL28823.1	0.110429	45.2905	50.1646	45.2905	128	128	410.133	380.604	410.133	1309	1309
1474	slr1856	AP012276	1194416..1194745	330	BAL28824.1	0.146505	46.9374	51.9888	46.9374	24	24	320.382	297.315	320.382	185	185
1475	glgX_2	AP012276	1194755..1196878	2124	BAL28825.1	0.139449	37.0704	41.0599	37.0704	122	122	265.835	246.695	265.835	988	988
1476	slr1859	AP012276	1196938..1197264	327	BAL28826.1	0.0573252	19.7367	21.8607	19.7367	10	10	344.293	319.505	344.293	197	197
1477	ICFG	AP012276	1197364..1199268	1905	BAL28827.1	0.126088	7.7921	8.63068	7.7921	23	23	61.7991	57.3497	61.7991	206	206
1478	slr1861	AP012276	1199274..1199705	432	BAL28828.1	0.158809	13.4456	14.8926	13.4456	9	9	84.6654	78.5696	84.6654	64	64
1479	slr1862	AP012276	1199810..1201933	2124	BAL28829.1	0.245501	4.55783	5.04834	4.55783	15	15	18.5654	17.2287	18.5654	69	69
1480	slr1864	AP012276	1201947..1203017	1071	BAL28830.1	0.206316	11.4495	12.6817	11.4495	19	19	55.495	51.4994	55.495	104	104
1481	slr1865	AP012276	1203195..1204457	1263	BAL28831.1	0.186971	12.7749	14.1498	12.7749	25	25	68.3256	63.4063	68.3256	151	151
1482	slr1866	AP012276	1204465..1205466	1002	BAL28832.1	0.188218	4.50871	4.99393	4.50871	7	7	23.9547	22.23	23.9547	42	42
1483	trpD	AP012276	1205866..1206912	1047	BAL28833.1	0.72042	45.6149	50.5239	45.6149	74	74	63.3171	58.7584	63.3171	116	116
1484	deoC	AP012276	complement(1206939..1207616)	678	BAL28834.1	0.657051	30.4608	33.739	30.4608	32	32	46.3599	43.0221	46.3599	55	55
1485	sll1775	AP012276	complement(1207668..1210121)	2454	BAL28835.1	0.418262	26.2995	29.1298	26.2995	100	100	62.878	58.3509	62.878	270	270
1486	sll1774	AP012276	complement(1210557..1211339)	783	BAL28836.1	0.932126	42.8611	47.4738	42.8611	47	52	45.9821	42.6714	45.9821	59	63
1487	slr1869	AP012276	1211519..1212277	759	BAL28837.1	0.517203	92.6843	102.659	92.6843	109	109	179.203	166.301	179.203	238	238
1488	slr1870	AP012276	1213107..1213856	750	BAL28838.1	0.564653	43.8865	48.6095	43.8865	51	51	77.7229	72.1269	77.7229	102	102
1489	sll1773	AP012276	complement(1214372..1215070)	699	BAL28839.1	0.941089	41.5487	46.0201	41.5487	45	45	44.1496	40.9709	44.1496	54	54
1490	slr1871	AP012276	1215200..1216087	888	BAL28840.1	0.621118	7.99468	8.85507	7.99468	11	11	12.8714	11.9447	12.8714	20	20
1491	mutS_1	AP012276	complement(1216075..1218543)	2469	BAL28841.1	0.374126	14.1154	15.6345	14.1154	54	54	37.7291	35.0127	37.7291	163	163
1492	sll1771	AP012276	complement(1218573..1219337)	765	BAL28842.1	0.538819	61.5861	68.214	61.5861	73	73	114.298	106.069	114.298	153	153
1493	sll1770	AP012276	complement(1219392..1221149)	1758	BAL28843.1	0.505538	45.5223	50.4214	45.5223	124	124	90.0473	83.564	90.0473	277	277
1494	sll1769	AP012276	complement(1221529..1221846)	318	BAL28844.1	0.464098	121.772	134.877	121.772	60	60	262.383	243.492	262.383	146	146
1495	ssl3383	AP012276	complement(1221856..1222128)	273	BAL28845.1	0.596023	89.8344	99.5023	89.8344	38	38	150.723	139.871	150.723	72	72
1496	ssl3382	AP012276	complement(1222174..1222350)	177	BAL28846.1	0.632412	153.143	169.624	153.143	42	42	242.157	224.723	242.157	75	75
1497	sll1768	AP012276	complement(1222585..1223565)	981	BAL28847.1	0.517599	21.7103	24.0468	21.7103	33	33	41.9443	38.9244	41.9443	72	72
1498	ddlA	AP012276	1223696..1224760	1065	BAL28848.1	0.332149	21.21	23.4926	21.21	35	35	63.8568	59.2592	63.8568	119	119
1499	exoD	AP012276	1224847..1225485	639	BAL28849.1	0.164462	15.15	16.7804	15.15	15	15	92.1184	85.486	92.1184	103	103
1500	clpS	AP012276	complement(1225605..1225901)	297	BAL28850.1	0.658762	45.6336	50.5446	45.6336	21	21	69.2717	64.2843	69.2717	36	36
1501	slr1876	AP012276	1226009..1226482	474	BAL28851.1	0.67911	242.361	268.444	242.361	178	178	356.881	331.186	356.881	296	296
1502	rps6	AP012276	complement(1226510..1226851)	342	BAL28852.1	0.460533	651.05	721.116	651.05	345	345	1413.69	1311.91	1413.69	846	846
1503	hpcE	AP012276	1227156..1227986	831	BAL28853.1	0.52833	62.1313	68.8179	62.1313	80	80	117.599	109.132	117.599	171	171
1504	cpcE	AP012276	1228039..1228857	819	BAL28854.1	0.497433	29.1568	32.2946	29.1568	37	37	58.6145	54.3944	58.6145	84	84
1505	aslB	AP012276	complement(1228890..1230086)	1197	BAL28855.1	0.38304	31.272	34.6375	31.272	58	58	81.6417	75.7636	81.6417	171	171
1506	sll1765	AP012276	complement(1230126..1230605)	480	BAL28856.1	0.530432	41.6814	46.1671	41.6814	31	31	78.5801	72.9225	78.5801	66	66
1507	sll1764	AP012276	complement(1230689..1231123)	435	BAL28857.1	0.362991	13.3529	14.7899	13.3529	9	9	36.7857	34.1372	36.7857	28	28
1508	sll1763	AP012276	complement(1231190..1231594)	405	BAL28858.1	0.643077	65.3357	72.3671	65.3357	41	41	101.599	94.2836	101.599	72	72
1509	sll1762	AP012276	complement(1231703..1232851)	1149	BAL28859.1	0.25031	48.3059	53.5045	48.3059	86	86	192.984	179.09	192.984	386	388
1510	cobI	AP012276	1232703..1233431	729	BAL28860.1	0.387191	10.6237	11.767	10.6237	11	12	27.4379	25.4624	27.4379	35	35
1511	sll1761	AP012276	complement(1233428..1234042)	615	BAL28861.1	0.205328	4.19765	4.6494	4.19765	4	4	20.4436	18.9717	20.4436	22	22
1512	thrB	AP012276	complement(1234055..1234975)	921	BAL28862.1	0.645318	42.0449	46.5697	42.0449	60	60	65.1538	60.4628	65.1538	105	105
1513	slr1880	AP012276	1235235..1236368	1134	BAL28863.1	0.242661	14.7973	16.3898	14.7973	26	26	60.9793	56.5889	60.9793	121	121
1514	glmM	AP012276	complement(1236462..1237907)	1446	BAL28864.1	1.251	114.706	127.051	114.706	257	257	91.6916	85.0899	91.6916	232	232
1515	ssr3184	AP012276	1238075..1238302	228	BAL28865.1	1.13957	314.203	348.017	314.203	111	111	275.72	255.868	275.72	110	110
1516	livF	AP012276	1238409..1239131	723	BAL28866.1	0.866942	67.8417	75.1428	67.8417	76	76	78.254	72.6199	78.254	99	99
1517	ribF	AP012276	1239280..1240221	942	BAL28867.1	0.48982	24.6645	27.3189	24.6645	36	36	50.3544	46.7289	50.3544	83	83
1518	sll1757	AP012276	complement(1240232..1241110)	879	BAL28868.1	0.343159	80.7654	89.4573	80.7654	110	110	235.358	218.413	235.358	362	362
1519	ssr3188	AP012276	1241255..1241524	270	BAL28869.1	0.682836	248.594	275.348	248.594	104	104	364.061	337.849	364.061	172	172
1520	ssl3364	AP012276	complement(1241684..1241908)	225	BAL28870.1	0.539399	1623.51	1798.23	1623.51	566	566	3009.86	2793.15	3009.86	1185	1185
1521	trpS	AP012276	1242193..1243206	1014	BAL28871.1	0.640237	45.8264	50.7583	45.8264	72	72	71.5774	66.4239	71.5774	127	127
1522	ssr3189	AP012276	1243357..1243524	168	BAL28872.1	1.52403	3307.62	3663.58	3307.62	861	861	2170.31	2014.05	2170.31	638	638
1523	slr1885	AP012276	1243650..1244228	579	BAL28873.1	0.816366	66.8797	74.0773	66.8797	60	60	81.9237	76.0253	81.9237	83	83
1524	slr1886	AP012276	1244314..1244778	465	BAL28874.1	1.27047	287.302	318.222	287.302	207	207	226.139	209.857	226.139	184	184
1525	sll1755	AP012276	complement(1244811..1246034)	1224	BAL28875.1	1.29718	44.8187	49.642	44.8187	85	85	34.551	32.0633	34.551	74	74
1526	hemC	AP012276	1246111..1247073	963	BAL28876.1	0.50281	125.325	138.812	125.325	187	187	249.249	231.303	249.249	420	420
1527	slr1888	AP012276	1247203..1249095	1893	BAL28877.1	0.777555	14.3192	15.8603	14.3192	42	42	18.4157	17.0898	18.4157	61	61
1528	pta	AP012276	1249361..1251454	2094	BAL28878.1	0.492788	7.39701	8.19307	7.39701	24	24	15.0105	13.9298	15.0105	55	55
1529	sll2015	AP012276	complement(1251512..1252126)	615	BAL28879.1	0.71412	45.1248	49.9811	45.1248	43	43	63.1893	58.6398	63.1893	68	68
1530	sfsA	AP012276	complement(1252188..1252901)	714	BAL28880.1	0.35723	28.0211	31.0367	28.0211	31	31	78.44	72.7925	78.44	98	98
1531	sll2013	AP012276	complement(1252955..1253542)	588	BAL28881.1	0.371171	51.5872	57.139	51.5872	47	47	138.985	128.978	138.985	143	143
1532	rpoD_1	AP012276	complement(1253702..1254658)	957	BAL28882.1	0.978253	91.7167	101.587	91.7167	136	136	93.7557	87.0054	93.7557	157	157
1533	sll2011	AP012276	complement(1255044..1255670)	627	BAL28883.1	0.0982005	4.11731	4.56042	4.11731	4	4	41.9276	38.9089	41.9276	46	46
1534	murD	AP012276	complement(1255824..1257182)	1359	BAL28884.1	0.208676	16.1466	17.8843	16.1466	34	34	77.3763	71.8054	77.3763	184	184
1535	sll2009	AP012276	complement(1257363..1258670)	1308	BAL28885.1	0.556811	35.0326	38.8028	35.0326	71	71	62.9165	58.3866	62.9165	144	144
1536	sll2008	AP012276	complement(1258679..1259971)	1293	BAL28886.1	0.720647	81.8591	90.6687	81.8591	164	164	113.591	105.413	113.591	257	257
1537	hupE	AP012276	1260136..1260912	777	BAL28887.1	0.177736	53.9901	59.8005	53.9901	65	65	303.766	281.895	303.766	413	413
1538	ispG	AP012276	1260968..1262179	1212	BAL28888.1	0.336057	91.5899	101.447	91.5899	172	172	272.543	252.92	272.543	578	578
1539	sll2007	AP012276	complement(1262333..1262749)	417	BAL28889.1	0.367681	43.3355	47.9992	43.3355	28	28	117.862	109.376	117.862	86	86
1540	sll2006	AP012276	complement(1262742..1263098)	357	BAL28890.1	0.627392	54.2344	60.071	54.2344	30	30	86.4441	80.2203	86.4441	54	54
1541	gyrB	AP012276	complement(1263247..1266483)	3237	BAL28891.1	0.501914	89.3217	98.9344	89.3217	448	448	177.962	165.149	177.962	1008	1008
1542	ssl3829	AP012276	complement(1266612..1266869)	258	BAL28892.1	0.384991	37.5226	41.5608	37.5226	15	15	97.4637	90.4465	97.4637	44	44
1543	psbY	AP012276	complement(1267108..1267227)	120	BAL28893.1	0.441735	618.498	685.06	618.498	115	115	1400.15	1299.35	1400.15	294	294
1544	slr2141	AP012276	1267307..1268329	1023	BAL28894.1	0.667317	41.0071	45.4203	41.0071	65	65	61.4507	57.0264	61.4507	110	110
1545	sll2003	AP012276	complement(1268326..1269657)	1332	BAL28895.1	0.517159	23.7418	26.2969	23.7418	49	49	45.9081	42.6028	45.9081	107	107
1546	cefD	AP012276	1269988..1271193	1206	BAL28896.1	0.496505	27.2926	30.2298	27.2926	51	51	54.9693	51.0116	54.9693	116	116
1547	sll2002	AP012276	complement(1271289..1272167)	879	BAL28897.1	0.272315	24.9639	27.6505	24.9639	34	34	91.6727	85.0724	91.6727	141	141
1548	slr2144	AP012276	1272327..1273232	906	BAL28898.1	0.642664	123.237	136.499	123.237	173	173	191.759	177.952	191.759	304	304
1549	mbpA	AP012276	1273271..1274200	930	BAL28899.1	0.418936	15.9612	17.679	15.9612	23	23	38.0994	35.3563	38.0994	62	62
1550	sll1710	AP012276	complement(1274291..1275076)	786	BAL28900.1	0.338792	4.92663	5.45684	4.92663	6	6	14.5418	13.4948	14.5418	16	20
1551	gdh	AP012276	complement(1275155..1275901)	747	BAL28901.1	0.464193	57.8863	64.116	57.8863	67	67	124.703	115.725	124.703	163	163
1552	ssl3291	AP012276	complement(1276027..1276311)	285	BAL28902.1	0.419051	133.607	147.986	133.607	59	59	318.832	295.877	318.832	159	159
1553	sll1708	AP012276	complement(1276361..1277041)	681	BAL28903.1	0.722756	30.3267	33.5904	30.3267	32	32	41.9597	38.9387	41.9597	50	50
1554	slr1805	AP012276	1277212..1279461	2250	BAL28904.1	1.42777	50.7706	56.2345	50.7706	177	177	35.5595	32.9993	35.5595	140	140
1555	csgA	AP012276	complement(1279486..1280256)	771	BAL28905.1	0.669219	13.3933	14.8347	13.3933	16	16	20.0133	18.5724	20.0133	27	27
1556	sppA_1	AP012276	complement(1280280..1282112)	1833	BAL28906.1	0.89072	19.7173	21.8393	19.7173	56	56	22.1363	20.5426	22.1363	71	71
1557	sll1702	AP012276	complement(1282109..1282621)	513	BAL28907.1	0.694458	134.613	149.1	134.613	107	107	193.839	179.883	193.839	174	174
1558	slr1807	AP012276	1282660..1283445	786	BAL28908.1	1.66074	41.0553	45.4736	41.0553	50	50	24.721	22.9411	24.721	34	34
1559	hemA	AP012276	1283579..1284862	1284	BAL28909.1	0.77214	187.987	208.218	187.987	374	374	243.463	225.934	243.463	547	547
1560	slr1809	AP012276	1285024..1285821	798	BAL28910.1	0.999501	62.2744	68.9763	62.2744	77	77	62.3055	57.8196	62.3055	87	87
1561	sll1699	AP012276	complement(1285787..1287682)	1896	BAL28911.1	0.50097	20.0833	22.2447	20.0833	59	59	40.0888	37.2025	40.0888	133	133
1562	sll1698	AP012276	complement(1287651..1288031)	381	BAL28912.1	0.501914	13.5515	15.0099	13.5515	8	8	26.9996	25.0557	26.9996	18	18
1563	sll1697	AP012276	complement(1288308..1289273)	966	BAL28913.1	1.10016	100.884	111.741	100.884	151	151	91.699	85.0968	91.699	155	155
1564	slr1811	AP012276	1289397..1289876	480	BAL28914.1	1.01348	47.0596	52.1241	47.0596	35	35	46.4337	43.0905	46.4337	39	39
1565	slr1812	AP012276	1289999..1290475	477	BAL28915.1	0.878349	28.4134	31.4712	28.4134	21	21	32.3486	30.0195	32.3486	27	27
1566	slr1813	AP012276	1290550..1291011	462	BAL28916.1	0.556098	90.8015	100.573	90.8015	65	65	163.283	151.527	163.283	132	132
1567	slr1814	AP012276	1291134..1291598	465	BAL28917.1	0.509113	76.3363	84.5516	76.3363	55	55	149.94	139.144	149.94	122	122
1568	slr1815	AP012276	1291739..1292275	537	BAL28918.1	0.564653	51.6792	57.2409	51.6792	43	43	91.5238	84.9342	91.5238	86	86
1569	slr1816	AP012276	1292317..1294470	2154	BAL28919.1	0.356623	23.3706	25.8858	23.3706	78	78	65.5332	60.8149	65.5332	247	247
1570	sll1696	AP012276	complement(1294487..1295299)	813	BAL28920.1	0.84698	76.2083	84.4098	76.2083	96	96	89.9765	83.4984	89.9765	128	128
1571	hofG_1	AP012276	complement(1295301..1295813)	513	BAL28921.1	1.67233	437.808	484.924	437.808	348	348	261.794	242.946	261.794	235	235
1572	hofG_2	AP012276	complement(1295912..1296418)	507	BAL28922.1	3.45287	18678.1	20688.2	18678.1	14673	14673	5409.44	5019.97	5409.44	4799	4799
1573	sll1693	AP012276	complement(1296562..1297884)	1323	BAL28923.1	1.24977	80.9785	89.6934	80.9785	166	166	64.795	60.1298	64.795	150	150
1574	slr1818	AP012276	1298039..1298644	606	BAL28924.1	1.65363	87.3299	96.7283	87.3299	82	82	52.8111	49.0088	52.8111	56	56
1575	sll1692	AP012276	complement(1298648..1299085)	438	BAL28925.1	0.932126	76.6215	84.8675	76.6215	52	52	82.2008	76.2825	82.2008	63	63
1576	sll1691	AP012276	complement(1299078..1299530)	453	BAL28926.1	3.04913	38.4669	42.6067	38.4669	27	27	12.6157	11.7074	12.6157	10	10
1577	slr1819	AP012276	1299580..1300575	996	BAL28927.1	0.779759	37.5829	41.6275	37.5829	58	58	48.1981	44.7279	48.1981	84	84
1578	rpoD2-V	AP012276	complement(1300590..1301699)	1110	BAL28928.1	0.812246	132.566	146.833	132.566	228	228	163.21	151.459	163.21	317	317
1579	thrC_1	AP012276	complement(1302214..1303515)	1302	BAL28929.1	0.713573	342.026	378.835	342.026	690	690	479.316	444.806	479.316	1092	1092
1580	slr1820	AP012276	1303890..1305362	1473	BAL28930.1	0.243827	8.32477	9.22068	8.32477	19	19	34.1421	31.6839	34.1421	88	88
1581	sll1687	AP012276	complement(1305355..1308267)	2913	BAL28931.1	0.977814	31.4608	34.8466	31.4608	142	142	32.1746	29.8581	32.1746	164	164
1582	slr1821	AP012276	1308401..1309501	1101	BAL28932.1	0.851608	107.858	119.466	107.858	184	184	126.652	117.533	126.652	244	244
1583	nth	AP012276	1309494..1310153	660	BAL28933.1	1.07911	84.0961	93.1465	84.0961	86	86	77.9307	72.3198	77.9307	90	90
1584	slr1732	AP012276	1310747..1311196	450	BAL28934.1	0.946176	133.38	147.735	133.38	93	93	140.968	130.818	140.968	111	111
1585	sll1631	AP012276	complement(1311228..1311722)	495	BAL28935.1	0.647469	56.0641	62.0977	56.0641	43	43	86.5896	80.3553	86.5896	75	75
1586	sll1630	AP012276	complement(1311762..1312187)	426	BAL28936.1	0.352908	7.57499	8.39021	7.57499	5	5	21.4645	19.9191	21.4645	16	16
1587	phr_1	AP012276	complement(1312197..1313666)	1470	BAL28937.1	0.201109	5.70752	6.32176	5.70752	13	13	28.3802	26.3369	28.3802	73	73
1588	sll1628	AP012276	complement(1313828..1314982)	1155	BAL28938.1	0.382606	34.6443	38.3727	34.6443	62	62	90.548	84.0287	90.548	183	183
1589	opcA	AP012276	1315200..1316573	1374	BAL28939.1	1.68354	189.765	210.187	189.765	404	404	112.718	104.602	112.718	271	271
1590	slr1735	AP012276	1316631..1317389	759	BAL28940.1	1.30172	128.398	142.216	128.398	151	151	98.6369	91.5352	98.6369	131	131
1591	lexA	AP012276	complement(1317638..1318249)	612	BAL28941.1	0.979972	1833.88	2031.24	1833.88	1739	1739	1871.35	1736.62	1871.35	2004	2004
1592	sdhB_1	AP012276	complement(1318465..1319460)	996	BAL28942.1	0.762282	52.4865	58.135	52.4865	81	81	68.8544	63.897	68.8544	120	120
1593	sll1624	AP012276	complement(1319754..1320758)	1005	BAL28943.1	0.927957	68.0709	75.3966	68.0709	106	106	73.3556	68.0741	73.3556	129	129
1594	sll1623	AP012276	complement(1320771..1321442)	672	BAL28944.1	0.709099	25.9308	28.7215	25.9308	27	27	36.5687	33.9358	36.5687	43	43
1595	ubiA_1	AP012276	1321606..1322532	927	BAL28945.1	0.529362	31.3296	34.7012	31.3296	45	45	59.1836	54.9225	59.1836	96	96
1596	slr1737	AP012276	1322591..1323682	1092	BAL28946.1	0.673621	20.0945	22.2571	20.0945	34	34	29.8306	27.6828	29.8306	57	57
1597	sll1621	AP012276	complement(1323754..1324323)	570	BAL28947.1	0.518205	524.237	580.655	524.237	463	463	1011.64	938.804	1011.64	1009	1009
1598	slr1738	AP012276	1324634..1325053	420	BAL28948.1	0.531438	61.4656	68.0805	61.4656	40	40	115.659	107.332	115.659	85	85
1599	sll1620	AP012276	complement(1325069..1325545)	477	BAL28949.1	0.564653	75.7689	83.9232	75.7689	56	56	134.187	124.525	134.187	112	112
1600	slr1739	AP012276	1325799..1326167	369	BAL28950.1	1.75962	117.184	129.796	117.184	67	67	66.5966	61.8017	66.5966	43	43
1601	slr1740	AP012276	1326286..1328034	1749	BAL28951.1	0.444048	29.8894	33.1061	29.8894	81	81	67.3112	62.4649	67.3112	206	206
1602	sll1618	AP012276	complement(1328307..1328909)	603	BAL28952.1	0.680905	43.8822	48.6048	43.8822	41	41	64.4468	59.8067	64.4468	68	68
1603	slr1742	AP012276	1329029..1329799	771	BAL28953.1	0.324676	19.2529	21.3248	19.2529	23	23	59.2987	55.0293	59.2987	80	80
1604	ndh_1	AP012276	1329849..1331063	1215	BAL28954.1	1.3788	55.7744	61.7768	55.7744	105	105	40.4513	37.5388	40.4513	86	86
1605	amiA_3	AP012276	1331348..1333297	1950	BAL28955.1	0.895789	154.893	171.563	154.893	468	468	172.913	160.463	172.913	590	590
1606	murI	AP012276	1333441..1334280	840	BAL28956.1	0.227486	150.591	166.797	150.591	196	196	661.978	614.316	661.978	973	973
1607	slr1747	AP012276	1334490..1335899	1410	BAL28957.1	1.01913	16.9357	18.7584	16.9357	37	37	16.6178	15.4214	16.6178	41	41
1608	ndh_2	AP012276	1336218..1337555	1338	BAL28958.1	0.589936	16.8824	18.6992	16.8824	35	35	28.6173	26.5569	28.6173	67	67
1609	slr0852	AP012276	1337646..1338074	429	BAL28959.1	0.48786	81.2378	89.9805	81.2378	54	54	166.519	154.529	166.519	125	125
1610	rimI	AP012276	1338074..1338550	477	BAL28960.1	0.752871	18.9422	20.9808	18.9422	14	14	25.16	23.3485	25.16	21	21
1611	phr_2	AP012276	1338602..1340041	1440	BAL28961.1	0.941089	29.1321	32.2673	29.1321	65	65	30.9558	28.727	30.9558	78	78
1612	sll0858	AP012276	complement(1340050..1340643)	594	BAL28962.1	1.90814	53.2392	58.9687	53.2392	49	49	27.9011	25.8923	27.9011	29	29
1613	sll0857	AP012276	complement(1340613..1341029)	417	BAL28963.1	2.25861	61.9078	68.5703	61.9078	40	40	27.4097	25.4362	27.4097	20	20
1614	rpoE_2	AP012276	complement(1340971..1341531)	561	BAL28964.1	2.61669	109.29	121.052	109.29	95	95	41.7668	38.7596	41.7668	41	41
1615	sll0855	AP012276	complement(1341694..1343049)	1356	BAL28965.1	0.371058	10.9469	12.125	10.9469	23	23	29.5018	27.3777	29.5018	70	70
1616	sll0854	AP012276	complement(1343059..1343985)	927	BAL28966.1	0.486344	41.0765	45.4972	41.0765	59	59	84.4599	78.3789	84.4599	137	137
1617	sll0853	AP012276	complement(1344036..1344596)	561	BAL28967.1	0.368907	56.3709	62.4375	56.3709	49	49	152.805	141.804	152.805	150	150
1618	slr0856	AP012276	1345116..1345475	360	BAL28968.1	0.376435	1.79275	1.98568	1.79275	1	1	4.76243	4.41954	4.76243	3	3
1619	slr0857	AP012276	1345469..1345963	495	BAL28969.1	1.5528	14.342	15.8855	14.342	6	11	9.23623	8.57123	9.23623	4	8
1620	psbC	AP012276	complement(1346393..1347775)	1383	BAL28970.1	2.33669	5949.9	6590.22	5949.9	12750	12750	2546.3	2362.97	2546.3	6162	6162
1621	psbD	AP012276	complement(1347759..1348817)	1059	BAL28971.1	1.84316	4298.94	4761.59	4298.94	6977	7054	2332.38	2164.45	2332.38	4306	4322
1622	dnaA	AP012276	complement(1349155..1350498)	1344	BAL28972.1	0.476426	12.9654	14.3607	12.9654	27	27	27.2139	25.2545	27.2139	64	64
1623	sll0847	AP012276	complement(1350553..1351158)	606	BAL28973.1	1.30266	280.095	310.238	280.095	263	263	215.017	199.536	215.017	228	228
1624	purT	AP012276	1351175..1352350	1176	BAL28974.1	0.725066	62.0144	68.6884	62.0144	113	113	85.5294	79.3714	85.5294	176	176
1625	sll0846	AP012276	complement(1352515..1352823)	309	BAL28975.1	0.738393	106.521	117.984	106.521	51	51	144.26	133.874	144.26	78	78
1626	lmbP	AP012276	1353013..1353993	981	BAL28976.1	0.250957	14.4736	16.0312	14.4736	22	22	57.6735	53.5211	57.6735	99	99
1627	slr0863	AP012276	1354081..1355472	1392	BAL28977.1	0.881107	32.9186	36.4612	32.9186	71	71	37.3604	34.6705	37.3604	91	91
1628	mnmA	AP012276	complement(1355469..1356545)	1077	BAL28978.1	1.2108	62.3217	69.0287	62.3217	104	104	51.4714	47.7655	51.4714	97	97
1629	sll0843	AP012276	complement(1356659..1357756)	1098	BAL28979.1	0.867146	25.2748	27.9949	25.2748	43	43	29.1471	27.0486	29.1471	56	56
1630	nplT	AP012276	complement(1357765..1359291)	1527	BAL28980.1	1.36369	27.0497	29.9608	27.0497	64	64	19.8357	18.4075	19.8357	53	53
1631	slr0864	AP012276	1359353..1361077	1725	BAL28981.1	0.421842	35.9173	39.7827	35.9173	96	96	85.144	79.0137	85.144	257	257
1632	slr0865	AP012276	1361178..1362191	1014	BAL28982.1	1.10176	50.9183	56.3981	50.9183	80	80	46.2153	42.8879	46.2153	82	82
1633	sll0839	AP012276	complement(1362184..1362777)	594	BAL28983.1	0.652488	28.2494	31.2895	28.2494	26	26	43.2948	40.1777	43.2948	45	45
1634	pyrF	AP012276	complement(1362756..1363451)	696	BAL28984.1	1.08413	66.7644	73.9495	66.7644	72	72	61.5831	57.1493	61.5831	75	75
1635	sll0837	AP012276	complement(1363498..1364382)	885	BAL28985.1	0.941657	201.274	222.935	201.274	276	276	213.744	198.355	213.744	331	331
1636	slr0867	AP012276	1364490..1365134	645	BAL28986.1	0.941089	15.009	16.6243	15.009	15	15	15.9486	14.8003	15.9486	18	18
1637	slr0868	AP012276	1365383..1365688	306	BAL28987.1	0.955567	23.2003	25.6971	23.2003	11	11	24.2791	22.531	24.2791	13	13
1638	slr0869	AP012276	1366048..1368486	2439	BAL28988.1	1.27527	43.9256	48.6529	43.9256	166	166	34.4441	31.9642	34.4441	147	147
1639	slr0870	AP012276	1368575..1368937	363	BAL28989.1	1.33097	58.6717	64.986	58.6717	33	33	44.082	40.9082	44.082	28	28
1640	slr0871	AP012276	1368962..1369345	384	BAL28990.1	1.12931	26.8912	29.7852	26.8912	16	16	23.8121	22.0977	23.8121	16	16
1641	slr0872	AP012276	1370087..1371205	1119	BAL28991.1	0.602297	18.4562	20.4424	18.4562	32	32	30.643	28.4367	30.643	60	60
1642	mutS_2	AP012276	complement(1371374..1374112)	2739	BAL28992.1	0.507035	15.5515	17.2252	15.5515	66	66	30.6715	28.4632	30.6715	147	147
1643	slr1243	AP012276	1374270..1377464	3195	BAL28993.1	0.264196	10.302	11.4107	10.302	51	51	38.9938	36.1863	38.9938	218	218
1644	sll1164	AP012276	complement(1377581..1378630)	1050	BAL28994.1	0.173739	2.45862	2.72322	2.45862	4	4	14.1512	13.1324	14.1512	26	26
1645	sll1163	AP012276	complement(1378634..1379041)	408	BAL28995.1	0.0705816	1.58184	1.75207	1.58184	1	1	22.4114	20.7978	22.4114	16	16
1646	sll1162	AP012276	complement(1379004..1379711)	708	BAL28996.1	0.211745	2.7347	3.02901	2.7347	3	3	12.9151	11.9852	12.9151	16	16
1647	sll1161	AP012276	complement(1379802..1380809)	1008	BAL28997.1	0.461989	5.7624	6.38255	5.7624	9	9	12.473	11.575	12.473	22	22
1648	sll1160	AP012276	complement(1381005..1381487)	483	BAL28998.1	1.50574	10.6897	11.8401	10.6897	8	8	7.09927	6.58814	7.09927	6	6
1649	sll1159	AP012276	complement(1381522..1382178)	657	BAL28999.1	0.271034	5.89396	6.52827	5.89396	6	6	21.7463	20.1806	21.7463	25	25
1650	sll1158	AP012276	complement(1382258..1382674)	417	BAL29000.1	1.35517	18.5723	20.5711	18.5723	12	12	13.7048	12.7181	13.7048	10	10
1651	slr1245	AP012276	1382747..1383655	909	BAL29001.1	0.84698	4.25999	4.71845	4.25999	6	6	5.02963	4.6675	5.02963	8	8
1652	ssr2078	AP012276	1383743..1384003	261	BAL29002.1	1.0352	27.2003	30.1276	27.2003	9	11	26.2755	24.3837	26.2755	12	12
1653	slr1246	AP012276	1384131..1384667	537	BAL29003.1	0.631083	22.835	25.2925	22.835	18	19	36.1838	33.5786	36.1838	33	34
1654	sll1157	AP012276	complement(1384673..1385089)	417	BAL29004.1	0.282327	9.28617	10.2855	9.28617	5	6	32.8916	30.5235	32.8916	24	24
1655	sll1156	AP012276	complement(1384978..1385403)	426	BAL29005.1	0.928197	90.8999	100.682	90.8999	59	60	97.9317	90.8807	97.9317	72	73
1656	sll1155	AP012276	complement(1385497..1385838)	342	BAL29006.1	1.08168	300.049	332.34	300.049	159	159	277.391	257.419	277.391	166	166
1657	norA	AP012276	complement(1385959..1387215)	1257	BAL29007.1	1.82146	128.359	142.173	128.359	250	250	70.4703	65.3966	70.4703	155	155
1658	pstS_1	AP012276	1387831..1388832	1002	BAL29008.1	0.573616	20.6112	22.8294	20.6112	32	32	35.9321	33.3451	35.9321	63	63
1659	pstC_1	AP012276	1388978..1389964	987	BAL29009.1	0.967977	11.77	13.0367	11.77	18	18	12.1594	11.2839	12.1594	21	21
1660	pstA_1	AP012276	1389969..1390841	873	BAL29010.1	1.998	17.0034	18.8333	17.0034	23	23	8.51018	7.89746	8.51018	13	13
1661	pstB_1	AP012276	1390895..1391710	816	BAL29011.1	0.580786	14.2365	15.7687	14.2365	18	18	24.5125	22.7476	24.5125	35	35
1662	cyp_1	AP012276	1391891..1392406	516	BAL29012.1	0.0780155	76.296	84.5069	76.296	61	61	977.959	907.548	977.959	883	883
1663	dcoH	AP012276	complement(1392535..1392825)	291	BAL29013.1	0.299972	75.4063	83.5215	75.4063	34	34	251.378	233.279	251.378	128	128
1664	sll1151	AP012276	complement(1392857..1394674)	1818	BAL29014.1	0.481441	28.755	31.8496	28.755	81	81	59.7268	55.4266	59.7268	190	190
1665	ssr2087	AP012276	1394841..1395095	255	BAL29015.1	0.167996	45.5569	50.4597	45.5569	18	18	271.178	251.654	271.178	121	121
1666	sll1150	AP012276	complement(1395230..1395988)	759	BAL29016.1	0.823513	723.618	801.493	723.618	851	851	878.697	815.432	878.697	1167	1167
1667	slr1253	AP012276	1396130..1396444	315	BAL29017.1	2.00275	465.09	515.143	465.09	227	227	232.225	215.505	232.225	128	128
1668	pds	AP012276	1396738..1398156	1419	BAL29018.1	1.11398	99.1507	109.821	99.1507	218	218	89.0061	82.5978	89.0061	221	221
1669	pys	AP012276	1398301..1399230	930	BAL29019.1	0.38969	68.0087	75.3278	68.0087	98	98	174.52	161.955	174.52	284	284
1670	sll1147	AP012276	complement(1399407..1399820)	414	BAL29020.1	1.46392	109.124	120.868	109.124	70	70	74.5424	69.1754	74.5424	54	54
1671	ureA	AP012276	1399978..1400280	303	BAL29021.1	0.470544	85.1999	94.369	85.1999	40	40	181.067	168.03	181.067	96	96
1672	slr1257	AP012276	1400728..1401921	1194	BAL29022.1	0.655726	9.72948	10.7766	9.72948	18	18	14.8377	13.7694	14.8377	31	31
1673	slr1258	AP012276	1402118..1402873	756	BAL29023.1	1.31368	97.3206	107.794	97.3206	114	114	74.0822	68.7484	74.0822	98	98
1674	slr1259	AP012276	1403004..1403702	699	BAL29024.1	2.64542	549.366	608.488	549.366	595	595	207.666	192.715	207.666	254	254
1675	slr1260	AP012276	1403758..1404291	534	BAL29025.1	2.60974	332.363	368.132	332.363	275	275	127.355	118.186	127.355	119	119
1676	slr1261	AP012276	1404355..1404894	540	BAL29026.1	2.34465	260.546	288.586	260.546	218	218	111.123	103.123	111.123	105	105
1677	slr1262	AP012276	1404900..1405766	867	BAL29027.1	2.25861	133.991	148.411	133.991	180	180	59.3244	55.0531	59.3244	90	90
1678	slr1263	AP012276	1405962..1407374	1413	BAL29028.1	0.37439	27.8618	30.8603	27.8618	61	61	74.4193	69.0612	74.4193	184	184
1679	sll1961	AP012276	complement(1407402..1408568)	1167	BAL29029.1	0.463063	54.1972	60.0299	54.1972	98	98	117.041	108.614	117.041	239	239
1680	sll1960	AP012276	complement(1408649..1409071)	423	BAL29030.1	0.238892	16.7832	18.5894	16.7832	11	11	70.2543	65.1961	70.2543	52	52
1681	suhB_1	AP012276	complement(1409106..1409909)	804	BAL29031.1	0.874302	19.2653	21.3387	19.2653	24	24	22.0351	20.4486	22.0351	31	31
1682	hisC_2	AP012276	complement(1409914..1410963)	1050	BAL29032.1	0.838913	79.9053	88.5047	79.9053	130	130	95.2486	88.3909	95.2486	175	175
1683	arsA	AP012276	complement(1411156..1411470)	315	BAL29033.1	0.669219	32.7817	36.3096	32.7817	16	16	48.985	45.4582	48.985	27	27
1684	apqZ	AP012276	1411842..1412585	744	BAL29034.1	0.202875	202.118	223.87	202.118	233	233	996.27	924.54	996.27	1297	1297
1685	topA	AP012276	1413045..1415741	2697	BAL29035.1	0.0856926	6.70037	7.42146	6.70037	28	28	78.1907	72.5611	78.1907	369	369
1686	slr2059	AP012276	1415762..1416166	405	BAL29036.1	0.141163	6.37421	7.0602	6.37421	4	4	45.1549	41.9038	45.1549	32	32
1687	slr2060	AP012276	1416203..1417600	1398	BAL29037.1	0.358721	12.4646	13.806	12.4646	27	27	34.7473	32.2456	34.7473	85	85
1688	sll1956	AP012276	complement(1417914..1418492)	579	BAL29038.1	0.125478	6.68797	7.40773	6.68797	6	6	53.2997	49.4622	53.2997	54	54
1689	sll1954	AP012276	complement(1418825..1419430)	606	BAL29039.1	0.658762	67.0949	74.3156	67.0949	63	63	101.85	94.517	101.85	108	108
1690	ssl3692	AP012276	complement(1419469..1419765)	297	BAL29040.1	0.434349	10.8651	12.0344	10.8651	5	5	25.0148	23.2138	25.0148	13	13
1691	slr2062	AP012276	1419859..1421061	1203	BAL29041.1	0.565074	360.517	399.315	360.517	672	672	637.999	592.064	637.999	1343	1343
1692	sll1951	AP012276	complement(1421345..1426570)	5226	BAL29042.1	0.543715	3182.86	3525.39	3182.86	25773	25773	5853.91	5432.43	5853.91	53531	53531
1693	sll1950	AP012276	complement(1427115..1427849)	735	BAL29043.1	1.01248	91.3204	101.148	91.3204	104	104	90.1946	83.7007	90.1946	116	116
1694	sll1949	AP012276	complement(1428248..1428991)	744	BAL29044.1	0.83045	272.382	301.696	272.382	314	314	327.993	304.378	327.993	427	427
1695	apcA	AP012276	1429338..1429823	486	BAL29045.1	0.417785	11087.1	12280.3	11087.1	8349	8349	26537.9	24627.2	26537.9	22568	22568
1696	apcB	AP012276	1429919..1430404	486	BAL29046.1	0.443556	10314.3	11424.3	10314.3	7767	7767	23253.6	21579.4	23253.6	19775	19775
1697	apcC	AP012276	1430617..1430820	204	BAL29047.1	0.399949	3856.52	4271.55	3856.52	1219	1219	9642.52	8948.27	9642.52	3442	3442
1698	prmA	AP012276	complement(1430915..1431817)	903	BAL29048.1	0.459287	60.7509	67.2889	60.7509	85	85	132.272	122.749	132.272	209	209
1699	serA	AP012276	complement(1431895..1433559)	1665	BAL29049.1	0.388873	181.794	201.359	181.794	469	469	467.49	433.832	467.49	1362	1362
1700	slr1990	AP012276	1433820..1434542	723	BAL29050.1	0.839209	72.305	80.0864	72.305	81	81	86.1585	79.9552	86.1585	109	109
1701	cyaA_2	AP012276	1434564..1435577	1014	BAL29051.1	1.32153	70.0126	77.5473	70.0126	110	110	52.9785	49.1641	52.9785	94	94
1702	slr1992	AP012276	1435618..1436082	465	BAL29052.1	0.402466	92.9915	102.999	92.9915	67	67	231.055	214.419	231.055	188	188
1703	thl	AP012276	1436292..1437521	1230	BAL29053.1	0.571624	21.513	23.8282	21.513	41	41	37.6348	34.9252	37.6348	81	81
1704	fabG_2	AP012276	1437623..1438345	723	BAL29054.1	0.915654	53.5593	59.3233	53.5593	60	60	58.4929	54.2815	58.4929	74	74
1705	sll1906	AP012276	complement(1438406..1439860)	1455	BAL29055.1	0.520367	41.6952	46.1825	41.6952	94	94	80.1267	74.3577	80.1267	204	204
1706	sll1905	AP012276	complement(1439921..1442965)	3045	BAL29056.1	1.35757	47.9008	53.0559	47.9008	226	226	35.2842	32.7438	35.2842	188	188
1707	slr1998	AP012276	1443034..1444311	1278	BAL29057.1	1.05872	30.3	33.5608	30.3	60	60	28.6193	26.5588	28.6193	64	64
1708	slr1999	AP012276	1444344..1444754	411	BAL29058.1	0.407805	40.8275	45.2214	40.8275	26	26	100.115	92.9072	100.115	72	72
1709	slr2000	AP012276	1444793..1445758	966	BAL29059.1	0.775345	30.7328	34.0403	30.7328	46	46	39.6376	36.7838	39.6376	67	67
1710	slr2001	AP012276	1446016..1446831	816	BAL29060.1	0.722756	88.5828	98.116	88.5828	112	112	122.563	113.738	122.563	175	175
1711	cphA	AP012276	1446979..1449600	2622	BAL29061.1	0.614184	53.4132	59.1615	53.4132	217	217	86.9661	80.7047	86.9661	399	399
1712	slr2003	AP012276	1449633..1450262	630	BAL29062.1	0.401531	32.7817	36.3096	32.7817	32	32	81.6417	75.7636	81.6417	90	90
1713	sll1902	AP012276	complement(1450238..1451437)	1200	BAL29063.1	0.54852	9.14301	10.127	9.14301	17	17	16.6685	15.4684	16.6685	35	35
1714	ssr3402	AP012276	1451791..1452081	291	BAL29064.1	0.341418	57.6636	63.8694	57.6636	26	26	168.894	156.734	168.894	86	86
1715	slr2004	AP012276	1452149..1453573	1425	BAL29065.1	0.376435	56.1602	62.2041	56.1602	124	124	149.189	138.448	149.189	372	372
1716	slr1712	AP012276	1453821..1454627	807	BAL29066.1	0.740529	63.9791	70.8645	63.9791	78	80	86.3965	80.1761	86.3965	122	122
1717	trmE	AP012276	complement(1454672..1456042)	1371	BAL29067.1	0.525712	25.4201	28.1558	25.4201	54	54	48.3538	44.8724	48.3538	116	116
1718	pma1	AP012276	complement(1456132..1458849)	2718	BAL29068.1	0.598668	10.4478	11.5722	10.4478	44	44	17.4517	16.1952	17.4517	83	83
1719	sll1613	AP012276	complement(1459048..1459485)	438	BAL29069.1	0.467299	17.6819	19.5848	17.6819	12	12	37.8385	35.1142	37.8385	29	29
1720	folC	AP012276	complement(1459734..1461020)	1287	BAL29070.1	0.346492	13.5396	14.9968	13.5396	27	27	39.0763	36.2629	39.0763	88	88
1721	sll1611	AP012276	complement(1461055..1462164)	1110	BAL29071.1	0.236544	18.0244	19.9642	18.0244	31	31	76.1989	70.7127	76.1989	148	148
1722	slr1715	AP012276	1462374..1462733	360	BAL29072.1	0.322659	3.58549	3.97136	3.58549	1	2	11.1123	10.3123	11.1123	2	7
1723	slr1716	AP012276	1462727..1463221	495	BAL29073.1	0	0	0	0	0	0	5.77264	5.35702	5.77264	5	5
1724	sll1609	AP012276	complement(1463245..1463778)	534	BAL29074.1	0.512127	47.1352	52.2078	47.1352	39	39	92.038	85.4114	92.038	86	86
1725	sll1608	AP012276	complement(1463873..1466185)	2313	BAL29075.1	0.471458	35.9945	39.8682	35.9945	129	129	76.3471	70.8503	76.3471	309	309
1726	slr1717	AP012276	1467072..1467878	807	BAL29076.1	0.535278	65.5786	72.6361	65.5786	82	82	122.513	113.692	122.513	173	173
1727	sll1606	AP012276	complement(1467932..1468720)	789	BAL29077.1	0.616936	48.261	53.4549	48.261	59	59	78.227	72.5948	78.227	108	108
1728	fabZ	AP012276	complement(1468766..1469266)	501	BAL29078.1	0.436146	72.1393	79.9029	72.1393	56	56	165.402	153.493	165.402	145	145
1729	comB	AP012276	1469529..1470254	726	BAL29079.1	0.459168	65.7835	72.863	65.7835	74	74	143.266	132.952	143.266	182	182
1730	drgA	AP012276	1470333..1470938	606	BAL29080.1	0.346425	188.505	208.792	188.505	177	177	544.143	504.966	544.143	577	577
1731	aspS	AP012276	1471068..1472867	1800	BAL29081.1	0.197049	42.6674	47.2592	42.6674	119	119	216.532	200.942	216.532	682	682
1732	slr1721	AP012276	1472893..1474371	1479	BAL29082.1	0.52199	45.3823	50.2663	45.3823	104	104	86.9409	80.6813	86.9409	225	225
1733	guaB_1	AP012276	1474474..1475637	1164	BAL29083.1	0.767648	364.833	404.096	364.833	658	658	475.261	441.043	475.261	968	968
1734	lacG	AP012276	1475764..1476576	813	BAL29084.1	0.238294	18.2582	20.2232	18.2582	23	23	76.6206	71.1041	76.6206	109	109
1735	sll1601	AP012276	complement(1476566..1477810)	1245	BAL29085.1	0.880859	20.217	22.3927	20.217	39	39	22.9515	21.299	22.9515	50	50
1736	slr1724	AP012276	1477907..1478701	795	BAL29086.1	0.479267	70.6275	78.2284	70.6275	87	87	147.366	136.756	147.366	205	205
1737	ssl3127	AP012276	complement(1478869..1479096)	228	BAL29087.1	1.80689	45.2905	50.1646	45.2905	16	16	25.0654	23.2608	25.0654	10	10
1738	mntB	AP012276	complement(1479382..1480302)	921	BAL29088.1	0.322659	2.80299	3.10465	2.80299	4	4	8.68717	8.06171	8.68717	14	14
1739	mntA	AP012276	complement(1480299..1481081)	783	BAL29089.1	1.41163	4.12126	4.56479	4.12126	5	5	2.9195	2.7093	2.9195	4	4
1740	mntC	AP012276	complement(1481180..1482172)	993	BAL29090.1	0.564653	3.24969	3.59942	3.24969	5	5	5.7552	5.34084	5.7552	10	10
1741	ssr2898	AP012276	1482316..1482522	207	BAL29091.1	0	0	0	0	0	0	5.52166	5.12411	5.52166	2	2
1742	kaiB2	AP012276	complement(1483131..1483457)	327	BAL29092.1	0.237749	15.7893	17.4886	15.7893	8	8	66.4119	61.6303	66.4119	38	38
1743	kaiC2	AP012276	complement(1483478..1485184)	1707	BAL29093.1	0.279291	8.69593	9.63178	8.69593	23	23	31.1357	28.894	31.1357	93	93
1744	slr1726	AP012276	1485607..1486329	723	BAL29094.1	0.549392	32.1356	35.594	32.1356	36	36	58.4929	54.2815	58.4929	74	74
1745	rbcR	AP012276	complement(1486364..1487314)	951	BAL29095.1	0.468001	31.2176	34.5772	31.2176	46	46	66.7041	61.9015	66.7041	111	111
1746	slr1727	AP012276	1487762..1489345	1584	BAL29096.1	0.448827	37.8922	41.9701	37.8922	93	93	84.4249	78.3464	84.4249	234	234
1747	sll1592	AP012276	complement(1489602..1490282)	681	BAL29097.1	0.276565	11.3725	12.5964	11.3725	12	12	41.1205	38.1599	41.1205	49	49
1748	sll1590	AP012276	complement(1490553..1491605)	1053	BAL29098.1	0.876186	27.5807	30.549	27.5807	45	45	31.4782	29.2118	31.4782	58	58
1749	kdpA	AP012276	1491944..1493620	1677	BAL29099.1	0.752871	25.3999	28.1335	25.3999	66	66	33.7374	31.3084	33.7374	99	99
1750	kdpB	AP012276	1493677..1495749	2073	BAL29100.1	0.83598	17.7459	19.6557	17.7459	57	57	21.2276	19.6993	21.2276	77	77
1751	ssr2912	AP012276	1495778..1496035	258	BAL29101.1	0.806647	25.0151	27.7072	25.0151	10	10	31.0112	28.7784	31.0112	14	14
1752	kdpC	AP012276	1496225..1496797	573	BAL29102.1	0.687404	15.7687	17.4657	15.7687	14	14	22.9395	21.2878	22.9395	23	23
1753	kdpD	AP012276	1497029..1498141	1113	BAL29103.1	0.385617	8.1181	8.99177	8.1181	14	14	21.0523	19.5365	21.0523	41	41
1754	sll1586	AP012276	complement(1498218..1503467)	5250	BAL29104.1	1.07148	38.7233	42.8907	38.7233	315	315	36.14	33.538	36.14	332	332
1755	sll0254	AP012276	complement(1503737..1505689)	1953	BAL29105.1	0.750293	64.1093	71.0087	64.1093	194	194	85.4457	79.2938	85.4457	292	292
1756	sll0253	AP012276	complement(1505795..1506334)	540	BAL29106.1	1.03617	106.37	117.817	106.37	89	89	102.657	95.2657	102.657	97	97
1757	cobO	AP012276	1506400..1507011	612	BAL29107.1	0.437151	75.9281	84.0995	75.9281	72	72	173.689	161.183	173.689	186	186
1758	ssl0467	AP012276	complement(1507090..1507305)	216	BAL29108.1	0.517898	215.13	238.282	215.13	72	72	415.39	385.482	415.39	157	157
1759	sll0252	AP012276	complement(1507401..1508687)	1287	BAL29109.1	0.714046	70.707	78.3164	70.707	141	141	99.023	91.8935	99.023	223	223
1760	ndhH	AP012276	1508909..1510093	1185	BAL29110.1	0.935617	310.44	343.85	310.44	570	570	331.803	307.913	331.803	688	688
1761	slr0262	AP012276	1510136..1510540	405	BAL29111.1	1.05256	152.981	169.445	152.981	96	96	145.342	134.878	145.342	103	103
1762	slr0263	AP012276	1510591..1510896	306	BAL29112.1	1.53263	40.0732	44.3858	40.0732	19	19	26.1467	24.2642	26.1467	14	14
1763	slr0264	AP012276	1510935..1512044	1110	BAL29113.1	0.668365	33.723	37.3523	33.723	58	58	50.456	46.8233	50.456	98	98
1764	slr0265	AP012276	1512144..1512929	786	BAL29114.1	0.26216	10.6744	11.8231	10.6744	3	13	40.717	37.7854	40.717	23	56
1765	dfp	AP012276	complement(1513049..1514257)	1209	BAL29115.1	0.0797157	25.6234	28.381	25.6234	48	48	321.434	298.292	321.434	680	680
1766	ssl0461	AP012276	complement(1514270..1514521)	252	BAL29116.1	0.0756828	130.614	144.671	130.614	51	51	1725.81	1601.56	1725.81	761	761
1767	sll0249	AP012276	complement(1514588..1515343)	756	BAL29117.1	0.000888868	1.70738	1.89113	1.70738	2	2	1920.85	1782.55	1920.85	2541	2541
1768	isiB	AP012276	complement(1515578..1516090)	513	BAL29118.1	0.000530564	2.51614	2.78692	2.51614	2	2	4742.38	4400.93	4742.38	4257	4257
1769	isiA	AP012276	complement(1516495..1517523)	1029	BAL29119.1	0.0106788	296.039	327.898	296.039	472	472	27722.1	25726.1	27722.1	49915	49915
1770	rbgA	AP012276	1518033..1518872	840	BAL29120.1	0.262364	17.6714	19.5731	17.6714	23	23	67.3544	62.505	67.3544	99	99
1771	ychF	AP012276	complement(1518928..1520019)	1092	BAL29121.1	0.31222	27.7777	30.7672	27.7777	47	47	88.9685	82.5629	88.9685	170	170
1772	galE_3	AP012276	complement(1520129..1521145)	1017	BAL29122.1	0.491003	31.73	35.1448	31.73	50	50	64.6229	59.9702	64.6229	115	115
1773	slr0269	AP012276	1521219..1521818	600	BAL29123.1	1.22087	43.0259	47.6564	43.0259	40	40	35.242	32.7046	35.242	37	37
1774	slr0270	AP012276	1521909..1522229	321	BAL29124.1	1.53037	291.531	322.905	291.531	145	145	190.497	176.782	190.497	107	107
1775	nblA2	AP012276	complement(1522446..1522628)	183	BAL29125.1	1.09166	306.824	339.845	306.824	87	87	281.061	260.825	281.061	90	90
1776	nblA1	AP012276	complement(1522715..1522903)	189	BAL29126.1	5.94768	269.766	298.798	269.766	79	79	45.3565	42.0909	45.3565	15	15
1777	slr0271	AP012276	1523487..1524005	519	BAL29127.1	0.752871	7.46115	8.26411	7.46115	6	6	9.91026	9.19674	9.91026	9	9
1778	slr0272	AP012276	1524124..1525101	978	BAL29128.1	0.564653	3.95944	4.38556	3.95944	6	6	7.01217	6.5073	7.01217	12	12
1779	slr0273	AP012276	1525143..1526093	951	BAL29129.1	0.661614	39.3613	43.5973	39.3613	58	58	59.4928	55.2094	59.4928	99	99
1780	sll0243	AP012276	complement(1526090..1527340)	1251	BAL29130.1	1.14878	30.438	33.7137	30.438	59	59	26.496	24.5883	26.496	58	58
1781	sll0242	AP012276	complement(1527391..1530180)	2790	BAL29131.1	1.07284	21.9756	24.3406	21.9756	95	95	20.4836	19.0088	20.4836	100	100
1782	sll0241	AP012276	complement(1530183..1531205)	1023	BAL29132.1	1.33258	74.4437	82.4553	74.4437	118	118	55.8643	51.8421	55.8643	100	100
1783	sll0240	AP012276	complement(1531220..1531876)	657	BAL29133.1	0.996447	14.7349	16.3207	14.7349	15	15	14.7875	13.7228	14.7875	17	17
1784	sll0238	AP012276	complement(1531863..1533467)	1605	BAL29134.1	0.972458	12.4655	13.807	12.4655	31	31	12.8185	11.8956	12.8185	36	36
1785	sll0237	AP012276	complement(1533467..1534498)	1032	BAL29135.1	0.275441	6.25377	6.9268	6.25377	10	10	22.7046	21.0699	22.7046	41	41
1786	ssl0438	AP012276	complement(1534573..1534842)	270	BAL29136.1	0.161329	4.78066	5.29515	4.78066	2	2	29.6329	27.4994	29.6329	14	14
1787	sll0236	AP012276	complement(1535036..1536712)	1677	BAL29137.1	0.47358	25.0151	27.7072	25.0151	65	65	52.8212	49.0182	52.8212	155	155
1788	slr2079	AP012276	1536747..1537730	984	BAL29138.1	0.491003	45.9118	50.8528	45.9118	70	70	93.5062	86.7739	93.5062	161	161
1789	ssr3532	AP012276	1537835..1538077	243	BAL29139.1	0.322659	37.1829	41.1845	37.1829	14	14	115.239	106.942	115.239	49	49
1790	slr2080	AP012276	1538064..1538516	453	BAL29140.1	0.376435	24.2199	26.8264	24.2199	17	17	64.3401	59.7077	64.3401	51	51
1791	tyrA	AP012276	1538596..1539435	840	BAL29141.1	0.253518	16.903	18.7221	16.903	22	22	66.674	61.8736	66.674	98	98
1792	ctaD_2	AP012276	1539569..1541203	1635	BAL29142.1	0.427631	56.0521	62.0844	56.0521	142	142	131.076	121.639	131.076	375	375
1793	ctaE_2	AP012276	1541260..1541856	597	BAL29143.1	0.422064	39.999	44.3037	39.999	37	37	94.77	87.9467	94.77	99	99
1794	slr2084	AP012276	1541955..1542620	666	BAL29144.1	0.762282	78.4933	86.9407	78.4933	81	81	102.971	95.5577	102.971	120	120
1795	hsp33	AP012276	complement(1542676..1543584)	909	BAL29145.1	1.87719	178.21	197.389	178.21	251	251	94.9342	88.0991	94.9342	151	151
1796	katG	AP012276	complement(1543633..1545897)	2265	BAL29146.1	2.21156	241.059	267.002	241.059	846	846	109	101.152	109	432	432
1797	ycf44	AP012276	1546101..1547477	1377	BAL29147.1	0.891558	77.3342	85.6569	77.3342	165	165	86.7406	80.4954	86.7406	209	209
1798	ilvG	AP012276	1547792..1549657	1866	BAL29148.1	0.854938	195.069	216.063	195.069	564	564	228.168	211.74	228.168	745	745
1799	shc	AP012276	1549871..1551814	1944	BAL29149.1	0.535942	55.7744	61.7768	55.7744	168	168	104.068	96.5752	104.068	354	354
1800	sll1985	AP012276	complement(1552520..1552879)	360	BAL29150.1	0.256661	17.9275	19.8568	17.9275	7	10	69.849	64.82	69.849	36	44
1801	sll1984	AP012276	complement(1552848..1553342)	495	BAL29151.1	#DIV/0!	0	0	0	0	0	0	0	0	0	0
1802	sll1983	AP012276	complement(1553336..1553695)	360	BAL29152.1	#DIV/0!	0	0	0	0	0	0	0	0	0	0
1803	sll1982	AP012276	complement(1553980..1554693)	714	BAL29153.1	0.332149	4.51953	5.00592	4.51953	5	5	13.6069	12.6273	13.6069	9	17
1804	slr2092	AP012276	1554956..1555357	402	BAL29154.1	1.06826	56.1906	62.2378	56.1906	35	35	52.6	48.8129	52.6	37	37
1805	ilvB	AP012276	complement(1555394..1557046)	1653	BAL29155.1	2.19183	140.947	156.116	140.947	361	361	64.3058	59.6759	64.3058	186	186
1806	ssl3769	AP012276	complement(1557346..1557570)	225	BAL29156.1	1.24964	387.233	428.907	387.233	135	135	309.875	287.565	309.875	122	122
1807	trxA_2	AP012276	complement(1557988..1558530)	543	BAL29157.1	0.768158	159.267	176.408	159.267	134	134	207.337	192.409	207.337	197	197
1808	sll1979	AP012276	complement(1558641..1559069)	429	BAL29158.1	0.468893	106.813	118.308	106.813	71	71	227.797	211.396	227.797	171	171
1809	glpX	AP012276	1559306..1560343	1038	BAL29159.1	0.595737	685.182	758.921	685.182	1102	1102	1150.14	1067.33	1150.14	2089	2089
1810	slr2095	AP012276	1560612..1561037	426	BAL29160.1	0.67324	46.9649	52.0193	46.9649	29	31	69.7595	64.737	69.7595	49	52
1811	slr2096	AP012276	1560926..1561342	417	BAL29161.1	0.407805	20.12	22.2854	20.12	11	13	49.3374	45.7852	49.3374	33	36
1812	glbN	AP012276	1561387..1561761	375	BAL29162.1	3.01148	137.683	152.5	137.683	80	80	45.7193	42.4276	45.7193	30	30
1813	slr2098	AP012276	1562034..1565819	3786	BAL29163.1	1.99289	40.9121	45.3151	40.9121	240	240	20.529	19.051	20.529	136	136
1814	slr2099	AP012276	1565909..1567009	1101	BAL29164.1	0.538987	12.3099	13.6347	12.3099	21	21	22.8389	21.1945	22.8389	44	44
1815	slr2100	AP012276	1567236..1568342	1107	BAL29165.1	0.311533	9.32812	10.332	9.32812	16	16	29.9426	27.7868	29.9426	58	58
1816	slr2101	AP012276	1568507..1568938	432	BAL29166.1	0.33574	32.867	36.4042	32.867	22	22	97.8944	90.8462	97.8944	74	74
1817	ftsY	AP012276	1569128..1570642	1515	BAL29167.1	0.845736	72.4199	80.2137	72.4199	170	170	85.6294	79.4643	85.6294	227	227
1818	slr2103	AP012276	1570650..1571534	885	BAL29168.1	0.355522	12.3973	13.7315	12.3973	17	17	34.8707	32.36	34.8707	54	54
1819	slr2104	AP012276	1571768..1574620	2853	BAL29169.1	0.556054	21.9428	24.3042	21.9428	97	97	39.4616	36.6204	39.4616	197	197
1820	sll1973	AP012276	complement(1574843..1575511)	669	BAL29170.1	0.690799	110.941	122.881	110.941	115	115	160.599	149.036	160.599	188	188
1821	slr2105	AP012276	1575684..1577471	1788	BAL29171.1	0.969666	59.1968	65.5675	59.1968	164	164	61.0486	56.6532	61.0486	191	191
1822	apt	AP012276	complement(1577644..1578162)	519	BAL29172.1	0.192222	29.8446	33.0564	29.8446	24	24	155.261	144.082	155.261	141	141
1823	sll1429	AP012276	complement(1578543..1579457)	915	BAL29173.1	0.752871	11.2855	12.5	11.2855	16	16	14.9899	13.9107	14.9899	24	24
1824	ssl2789	AP012276	complement(1579505..1579720)	216	BAL29174.1	0	0	0	0	0	0	13.229	12.2765	13.229	5	5
1825	sll1428	AP012276	complement(1579851..1580729)	879	BAL29175.1	0.328525	11.7477	13.012	11.7477	16	16	35.7589	33.1843	35.7589	55	55
1826	slr1503	AP012276	1581125..1582117	993	BAL29176.1	0.647963	45.4957	50.3919	45.4957	70	70	70.2135	65.1582	70.2135	122	122
1827	hhoB	AP012276	complement(1582168..1583418)	1251	BAL29177.1	1.72604	138.777	153.712	138.777	269	269	80.4017	74.6129	80.4017	176	176
1828	sll1426	AP012276	complement(1583532..1584002)	471	BAL29178.1	0.838424	268.57	297.473	268.57	196	196	320.327	297.264	320.327	264	264
1829	proS	AP012276	complement(1584128..1585939)	1812	BAL29179.1	0.712127	95.4549	105.728	95.4549	268	268	134.042	124.391	134.042	425	425
1830	slr1505	AP012276	1586150..1586746	597	BAL29180.1	0.986261	141.618	156.859	141.618	131	131	143.591	133.253	143.591	150	150
1831	sll1424	AP012276	complement(1586818..1588293)	1476	BAL29181.1	1.05935	46.3491	51.3371	46.3491	106	106	43.7524	40.6023	43.7524	113	113
1832	ntcA	AP012276	complement(1588303..1588980)	678	BAL29182.1	0.650128	238.927	264.64	238.927	251	251	367.508	341.048	367.508	436	436
1833	ssl2781	AP012276	complement(1589053..1589301)	249	BAL29183.1	0.443279	108.861	120.576	108.861	42	42	245.581	227.899	245.581	107	107
1834	slr1506	AP012276	1589415..1591283	1869	BAL29184.1	0.631904	85.9828	95.2362	85.9828	249	249	136.069	126.273	136.069	445	445
1835	slr1507	AP012276	1591837..1592919	1083	BAL29185.1	1.01516	249.098	275.905	249.098	418	418	245.377	227.711	245.377	465	465
1836	dgdA	AP012276	1593038..1594207	1170	BAL29186.1	0.790895	114.736	127.084	114.736	208	208	145.071	134.626	145.071	297	297
1837	ntpJ	AP012276	1594204..1595538	1335	BAL29187.1	0.55895	23.6884	26.2378	23.6884	49	49	42.3803	39.329	42.3803	99	99
1838	plsX	AP012276	1595714..1596760	1047	BAL29188.1	0.433525	49.9298	55.3032	49.9298	81	81	115.172	106.879	115.172	211	211
1839	fabH	AP012276	1596855..1597847	993	BAL29189.1	0.45061	52.645	58.3107	52.645	81	81	116.831	108.419	116.831	203	203
1840	sll1418	AP012276	complement(1597891..1598457)	567	BAL29190.1	1.05809	118.378	131.118	118.378	104	104	111.879	103.824	111.879	111	111
1841	slr1512	AP012276	1599578..1600702	1125	BAL29191.1	0.644123	44.1733	48.9272	44.1733	77	77	68.579	63.6414	68.579	135	135
1842	slr1513	AP012276	1600788..1601120	333	BAL29192.1	0.329112	98.8434	109.481	98.8434	51	51	300.333	278.71	300.333	175	175
1843	ppnK	AP012276	complement(1601401..1602324)	924	BAL29193.1	0.639387	53.7824	59.5705	53.7824	77	77	84.1156	78.0595	84.1156	136	136
1844	psb29	AP012276	complement(1602356..1603078)	723	BAL29194.1	0.484607	99.9773	110.737	99.9773	112	112	206.306	191.452	206.306	261	261
1845	ssr2549	AP012276	1603212..1603382	171	BAL29195.1	0.794697	71.7099	79.4273	71.7099	19	19	90.2355	83.7387	90.2355	27	27
1846	slr1515	AP012276	1603782..1605206	1425	BAL29196.1	0.932246	55.7073	61.7025	55.7073	123	123	59.756	55.4536	59.756	149	149
1847	ssr2551	AP012276	1605280..1605564	285	BAL29197.1	0.307993	6.79357	7.52469	6.79357	3	3	22.0576	20.4695	22.0576	11	11
1848	sodB	AP012276	1606272..1606871	600	BAL29198.1	1.07373	457.151	506.349	457.151	425	425	425.761	395.107	425.761	447	447
1849	leuB	AP012276	1607151..1608239	1089	BAL29199.1	0.42427	40.2998	44.6368	40.2998	68	68	94.9862	88.1474	94.9862	181	181
1850	ssr2554	AP012276	1608458..1608724	267	BAL29200.1	0.867841	377.081	417.663	377.081	156	156	434.505	403.221	434.505	203	203
1851	menA	AP012276	1608745..1609668	924	BAL29201.1	0.897654	108.263	119.915	108.263	155	155	120.607	111.923	120.607	195	195
1852	ntrX	AP012276	1609646..1610383	738	BAL29202.1	1.25478	52.4707	58.1175	52.4707	60	60	41.8165	38.8057	41.8165	54	54
1853	slr1520	AP012276	1610493..1611548	1056	BAL29203.1	1.02175	11.6121	12.8618	11.6121	19	19	11.3649	10.5466	11.3649	21	21
1854	hflX	AP012276	1611716..1613320	1605	BAL29204.1	0.63144	20.9098	23.1601	20.9098	52	52	33.1145	30.7303	33.1145	93	93
1855	slr1522	AP012276	1613491..1614567	1077	BAL29205.1	0.752871	7.19096	7.96485	7.19096	12	12	9.55139	8.86371	9.55139	17	18
1856	slr1523	AP012276	1614788..1615447	660	BAL29206.1	0.785604	15.6458	17.3296	15.6458	16	16	19.9156	18.4817	19.9156	23	23
1857	slr1524	AP012276	1615823..1616338	516	BAL29207.1	#DIV/0!	0	0	0	0	0	0	0	0	0	0
1858	sll1411	AP012276	complement(1616295..1616732)	438	BAL29208.1	0.0664298	1.47349	1.63207	1.47349	1	1	22.1812	20.5842	22.1812	17	17
1859	ssl2749	AP012276	complement(1616725..1617015)	291	BAL29209.1	0.271034	13.307	14.7391	13.307	6	6	49.0972	45.5623	49.0972	25	25
1860	lap	AP012276	complement(1617046..1618524)	1479	BAL29210.1	0.485404	42.7641	47.3664	42.7641	98	98	88.1001	81.7571	88.1001	228	228
1861	ssr3570	AP012276	1618956..1619141	186	BAL29211.1	0.781827	31.2285	34.5893	31.2285	9	9	39.943	37.0671	39.943	13	13
1862	ssr3571	AP012276	1619195..1619458	264	BAL29212.1	0.95216	105.12	116.433	105.12	43	43	110.402	102.453	110.402	51	51
1863	kpsM	AP012276	1619892..1620800	909	BAL29213.1	2.07039	7.80999	8.6505	7.80999	11	11	3.77222	3.50063	3.77222	6	6
1864	kpsT	AP012276	1620897..1622012	1116	BAL29214.1	0.856715	12.7227	14.0919	12.7227	22	22	14.8506	13.7814	14.8506	29	29
1865	sll1999	AP012276	complement(1622049..1622567)	519	BAL29215.1	0	0	0	0	0	0	4.40456	4.08744	4.40456	2	4
1866	sll1998	AP012276	complement(1622642..1623490)	849	BAL29216.1	0	0	0	0	0	0	4.03881	3.74802	4.03881	2	6
1867	sll1997	AP012276	complement(1623547..1624014)	468	BAL29217.1	0	0	0	0	0	0	15.8748	14.7318	15.8748	2	13
1868	slr2110	AP012276	1624210..1624551	342	BAL29218.1	0.225861	7.54841	8.36077	7.54841	4	4	33.4206	31.0143	33.4206	20	20
1869	slr2111	AP012276	1624541..1625014	474	BAL29219.1	0.439175	9.53106	10.5568	9.53106	7	7	21.7022	20.1397	21.7022	18	18
1870	slr2112	AP012276	1625084..1625443	360	BAL29220.1	0	0	0	0	0	0	6.34991	5.89272	6.34991	1	4
1871	slr2113	AP012276	1625437..1625931	495	BAL29221.1	#DIV/0!	0	0	0	0	0	0	0	0	0	0
1872	spsC	AP012276	1625900..1626937	1038	BAL29222.1	0.677584	3.73057	4.13205	3.73057	6	6	5.5057	5.1093	5.5057	10	10
1873	slr2115	AP012276	1626958..1628526	1569	BAL29223.1	0.304044	8.63809	9.56772	8.63809	21	21	28.4107	26.3651	28.4107	78	78
1874	spsA	AP012276	1628523..1629353	831	BAL29224.1	0.23955	5.43649	6.02156	5.43649	7	7	22.6946	21.0606	22.6946	33	33
1875	slr2117	AP012276	1629379..1629924	546	BAL29225.1	0.120997	7.09219	7.85544	7.09219	6	6	58.6145	54.3944	58.6145	56	56
1876	slr2118	AP012276	1630184..1631449	1266	BAL29226.1	0.218575	3.05872	3.38789	3.05872	6	6	13.9939	12.9863	13.9939	31	31
1877	slr2119	AP012276	1631457..1632293	837	BAL29227.1	0.169396	9.25289	10.2487	9.25289	12	12	54.6229	50.6901	54.6229	80	80
1878	slr2120	AP012276	1632341..1633333	993	BAL29228.1	0.458781	8.4492	9.3585	8.4492	13	13	18.4166	17.0907	18.4166	32	32
1879	slr2121	AP012276	1633330..1633977	648	BAL29229.1	0.546439	14.9396	16.5473	14.9396	15	15	27.3399	25.3714	27.3399	31	31
1880	slr2122	AP012276	1633991..1634668	678	BAL29230.1	0.426153	19.038	21.0869	19.038	20	20	44.6741	41.4577	44.6741	53	53
1881	slr2123	AP012276	1634665..1635621	957	BAL29231.1	0.527559	43.1608	47.8058	43.1608	64	64	81.8123	75.9219	81.8123	137	137
1882	slr2124	AP012276	1635624..1636373	750	BAL29232.1	0.611708	55.9337	61.9533	55.9337	65	65	91.4387	84.8552	91.4387	120	120
1883	slr2125	AP012276	1636395..1637189	795	BAL29233.1	1.19275	76.3102	84.5226	76.3102	94	94	63.9783	59.372	63.9783	89	89
1884	slr2126	AP012276	1637300..1638166	867	BAL29234.1	0.903445	35.7309	39.5762	35.7309	48	48	39.5496	36.7021	39.5496	60	60
1885	slr2127	AP012276	1638863..1639438	576	BAL29235.1	0.658762	7.84327	8.68736	7.84327	7	7	11.9061	11.0489	11.9061	12	12
1886	slr2128	AP012276	1639705..1640157	453	BAL29236.1	0.777967	44.1657	48.9188	44.1657	31	31	56.7707	52.6833	56.7707	45	45
1887	sll1995	AP012276	complement(1640197..1641126)	930	BAL29237.1	0.455365	17.3492	19.2163	17.3492	25	25	38.0994	35.3563	38.0994	62	62
1888	hemB	AP012276	complement(1641207..1642190)	984	BAL29238.1	0.654171	124.618	138.029	124.618	190	190	190.497	176.782	190.497	328	328
1889	petL	AP012276	complement(1642421..1642519)	99	BAL29239.1	0.615219	951.786	1054.22	951.786	146	146	1547.07	1435.68	1547.07	268	268
1890	aroB	AP012276	1642601..1643686	1086	BAL29240.1	0.585961	32.6854	36.203	32.6854	55	55	55.7809	51.7648	55.7809	106	106
1891	slr2131	AP012276	1643824..1647009	3186	BAL29241.1	1.08915	43.9578	48.6885	43.9578	217	217	40.3596	37.4538	40.3596	225	225
1892	sll1241	AP012276	complement(1647600..1648358)	759	BAL29242.1	0.720834	25.5094	28.2548	25.5094	30	30	35.3888	32.8409	35.3888	47	47
1893	sll1240	AP012276	complement(1648360..1648833)	474	BAL29243.1	1.12931	34.0395	37.7028	34.0395	25	25	30.142	27.9718	30.142	25	25
1894	sll1239	AP012276	complement(1648826..1649362)	537	BAL29244.1	1.44204	99.7529	110.488	99.7529	83	83	69.175	64.1945	69.175	65	65
1895	slr1322	AP012276	1649808..1651277	1470	BAL29245.1	1.50694	183.958	203.755	183.958	419	419	122.074	113.285	122.074	314	314
1896	hemK	AP012276	complement(1651316..1652215)	900	BAL29246.1	1.04696	63.8218	70.6903	63.8218	89	89	60.9591	56.5701	60.9591	96	96
1897	slr1324	AP012276	1652321..1653583	1263	BAL29247.1	1.04696	45.4787	50.3731	45.4787	89	89	43.4388	40.3113	43.4388	96	96
1898	ssr2194	AP012276	1653862..1654059	198	BAL29248.1	0.778832	65.1908	72.2066	65.1908	20	20	83.7033	77.6768	83.7033	29	29
1899	sll1236	AP012276	complement(1654208..1654591)	384	BAL29249.1	1.34889	72.2701	80.0478	72.2701	43	43	53.5773	49.7199	53.5773	36	36
1900	spoT	AP012276	1654962..1657244	2283	BAL29250.1	1.33311	157.178	174.093	157.178	556	556	117.903	109.414	117.903	471	471
1901	ahcY	AP012276	complement(1657430..1658707)	1278	BAL29251.1	0.399879	401.979	445.24	401.979	796	796	1005.25	932.876	1005.25	2248	2248
1902	ssr2201	AP012276	1658988..1659206	219	BAL29252.1	0.461989	26.5228	29.3772	26.5228	9	9	57.4101	53.2767	57.4101	22	22
1903	slr1327	AP012276	1659196..1659630	435	BAL29253.1	0.94716	38.575	42.7264	38.575	26	26	40.727	37.7947	40.727	31	31
1904	sll1233	AP012276	complement(1659658..1660542)	885	BAL29254.1	0.524321	18.9606	21.0011	18.9606	26	26	36.1622	33.5586	36.1622	56	56
1905	sll1232	AP012276	complement(1660641..1661204)	564	BAL29255.1	0.256661	5.72153	6.33728	5.72153	5	5	22.2922	20.6872	22.2922	22	22
1906	mtfB	AP012276	complement(1661225..1662424)	1200	BAL29256.1	0.655726	9.68084	10.7227	9.68084	18	18	14.7635	13.7006	14.7635	31	31
1907	sll1229	AP012276	complement(1662473..1663609)	1137	BAL29257.1	0.734049	29.5165	32.693	29.5165	52	52	40.2105	37.3154	40.2105	80	80
1908	sll1228	AP012276	complement(1663717..1665618)	1902	BAL29258.1	1.18659	49.2016	54.4966	49.2016	145	145	41.4647	38.4793	41.4647	138	138
1909	atpB	AP012276	1665851..1667302	1452	BAL29259.1	0.335967	496.932	550.411	496.932	1118	1118	1479.11	1372.61	1479.11	3758	3758
1910	atpE	AP012276	1667450..1667860	411	BAL29260.1	0.268187	230.833	255.675	230.833	147	147	860.714	798.744	860.714	619	619
1911	ymxG	AP012276	1668020..1669561	1542	BAL29261.1	0.345706	31.3905	34.7687	31.3905	75	75	90.8012	84.2637	90.8012	245	245
1912	fabF_2	AP012276	1669569..1670783	1215	BAL29262.1	0.504584	11.1549	12.3554	11.1549	21	21	22.1071	20.5154	22.1071	47	47
1913	hoxH	AP012276	complement(1670990..1672414)	1425	BAL29263.1	0.572284	33.9678	37.6234	33.9678	75	75	59.3549	55.0815	59.3549	148	148
1914	sll1225	AP012276	complement(1672504..1672953)	450	BAL29264.1	0.645318	34.4207	38.1251	34.4207	24	24	53.3392	49.4989	53.3392	42	42
1915	ssl2420	AP012276	complement(1672963..1673217)	255	BAL29265.1	1.02664	50.6187	56.0663	50.6187	20	20	49.3052	45.7553	49.3052	22	22
1916	hoxY	AP012276	complement(1673269..1673817)	549	BAL29266.1	1.08587	58.7786	65.1043	58.7786	50	50	54.1304	50.2331	54.1304	52	52
1917	hoxU	AP012276	complement(1673863..1674579)	717	BAL29267.1	1.31	78.3108	86.7386	78.3108	87	87	59.7795	55.4754	59.7795	75	75
1918	sll1222	AP012276	complement(1674606..1675244)	639	BAL29268.1	1.60156	78.7799	87.2581	78.7799	78	78	49.1894	45.6479	49.1894	55	55
1919	hoxF	AP012276	complement(1675285..1676886)	1602	BAL29269.1	2.78562	74.5299	82.5508	74.5299	185	185	26.7552	24.8289	26.7552	75	75
1920	sll1220	AP012276	complement(1676963..1677484)	522	BAL29270.1	2.6821	93.9647	104.077	93.9647	76	76	35.034	32.5116	35.034	32	32
1921	ssr2227	AP012276	1678436..1678723	288	BAL29271.1	6.77584	26.8912	29.7852	26.8912	12	12	3.96869	3.68295	3.96869	2	2
1922	slr1334	AP012276	1679581..1681053	1473	BAL29272.1	0.386749	21.9073	24.265	21.9073	50	50	56.6448	52.5665	56.6448	146	146
1923	sll1219	AP012276	complement(1680920..1681246)	327	BAL29273.1	0.330269	122.367	135.536	122.367	57	62	370.508	343.832	370.508	204	212
1924	ycf39_1	AP012276	complement(1681789..1682448)	660	BAL29274.1	0.539153	72.3618	80.1493	72.3618	74	74	134.214	124.551	134.214	155	155
1925	sll1217	AP012276	complement(1682502..1683179)	678	BAL29275.1	0.745342	31.4127	34.7934	31.4127	33	33	42.1454	39.111	42.1454	50	50
1926	ssr1375	AP012276	1683416..1683610	195	BAL29276.1	0.148668	172.104	190.625	172.104	52	52	1157.64	1074.29	1157.64	395	395
1927	dacB_1	AP012276	1683847..1684791	945	BAL29277.1	0.20013	76.4906	84.7224	76.4906	112	112	382.204	354.686	382.204	632	632
1928	slr0806	AP012276	1684818..1686137	1320	BAL29278.1	0.282327	24.4466	27.0775	24.4466	50	50	86.5896	80.3553	86.5896	200	200
1929	psaJ	AP012276	complement(1686245..1686367)	123	BAL29279.1	0.60088	5787.51	6410.36	5787.51	1103	1103	9631.72	8938.26	9631.72	2073	2073
1930	psaF	AP012276	complement(1686475..1686972)	498	BAL29280.1	0.594444	5611.52	6215.42	5611.52	4330	4330	9439.94	8760.28	9439.94	8226	8226
1931	gcp	AP012276	1687132..1688178	1047	BAL29281.1	0.891012	53.0119	58.717	53.0119	86	86	59.4963	55.2126	59.4963	109	109
1932	slr0808	AP012276	1688232..1688789	558	BAL29282.1	0.627392	23.1322	25.6217	23.1322	20	20	36.8704	34.2158	36.8704	36	36
1933	rfbB_2	AP012276	1688924..1689853	930	BAL29283.1	0.379245	62.457	69.1786	62.457	90	90	164.688	152.831	164.688	268	268
1934	slr0810	AP012276	1690002..1690361	360	BAL29284.1	0.461989	48.4042	53.6134	48.4042	27	27	104.773	97.2299	104.773	66	66
1935	sll0818	AP012276	complement(1690412..1691251)	840	BAL29285.1	1.07284	58.3923	64.6765	58.3923	76	76	54.4278	50.5091	54.4278	80	80
1936	ssl1520	AP012276	complement(1691251..1691478)	228	BAL29286.1	1.39503	118.887	131.682	118.887	42	42	85.2224	79.0866	85.2224	34	34
1937	miaA	AP012276	complement(1691546..1692457)	912	BAL29287.1	0.384991	10.615	11.7573	10.615	15	15	27.572	25.5868	27.572	44	44
1938	sll0816	AP012276	complement(1692465..1693580)	1116	BAL29288.1	0.485864	21.3973	23.7001	21.3973	37	37	44.0397	40.8689	44.0397	86	86
1939	sll0815	AP012276	complement(1693636..1694430)	795	BAL29289.1	0.370264	32.4724	35.9671	32.4724	40	40	87.7006	81.3863	87.7006	122	122
1940	sll0814	AP012276	complement(1694805..1695716)	912	BAL29290.1	0.772154	217.253	240.633	217.253	307	307	281.359	261.102	281.359	449	449
1941	ctaC_2	AP012276	complement(1695930..1696832)	903	BAL29291.1	0.740441	99.3456	110.037	99.3456	139	139	134.171	124.511	134.171	212	212
1942	slr0812	AP012276	1696912..1697685	774	BAL29292.1	0.564653	17.5106	19.395	17.5106	21	21	31.0112	28.7784	31.0112	42	42
1943	slr0813	AP012276	1697730..1698899	1170	BAL29293.1	0.54852	9.37745	10.3866	9.37745	17	17	17.0959	15.865	17.0959	35	35
1944	sll0812	AP012276	complement(1698889..1699350)	462	BAL29294.1	0.25312	18.1603	20.1147	18.1603	13	13	71.7457	66.5801	71.7457	58	58
1945	ndhL	AP012276	1699812..1700054	243	BAL29295.1	0.480219	241.689	267.699	241.689	91	91	503.289	467.053	503.289	214	214
1946	slr0815	AP012276	1700111..1700476	366	BAL29296.1	0.828765	160.466	177.735	160.466	91	91	193.62	179.68	193.62	124	124
1947	slr0816	AP012276	1700534..1701037	504	BAL29297.1	0.525978	43.5382	48.2237	43.5382	34	34	82.7756	76.8159	82.7756	73	73
1948	sll0811	AP012276	complement(1701219..1701563)	345	BAL29298.1	0.237749	7.48277	8.28806	7.48277	4	4	31.4735	29.2074	31.4735	19	19
1949	sll0810	AP012276	complement(1701585..1702145)	561	BAL29299.1	0.665036	60.9726	67.5344	60.9726	53	53	91.6831	85.0821	91.6831	90	90
1950	sll0809	AP012276	complement(1702345..1703016)	672	BAL29300.1	1.21618	13.4456	14.8926	13.4456	14	14	11.0556	10.2597	11.0556	13	13
1951	entC	AP012276	1703294..1704718	1425	BAL29301.1	0.624956	25.8156	28.5938	25.8156	57	57	41.3078	38.3337	41.3078	103	103
1952	slr0818	AP012276	1704787..1706142	1356	BAL29302.1	1.01167	20.4659	22.6684	20.4659	43	43	20.2298	18.7733	20.2298	48	48
1953	int	AP012276	1706236..1707795	1560	BAL29303.1	0.564653	10.7565	11.9141	10.7565	26	26	19.0497	17.6782	19.0497	52	52
1954	ssr1391	AP012276	1707792..1708073	282	BAL29304.1	0.602297	18.3089	20.2793	18.3089	8	8	30.3985	28.2098	30.3985	15	15
1955	slr0820	AP012276	1708151..1709587	1437	BAL29305.1	0.614184	13.9228	15.4212	13.9228	31	31	22.6688	21.0367	22.6688	57	57
1956	ssl1507	AP012276	complement(1709733..1709933)	201	BAL29306.1	0.347479	12.8436	14.2258	12.8436	4	4	36.9621	34.3009	36.9621	13	13
1957	sll0808	AP012276	complement(1710012..1710578)	567	BAL29307.1	0.0868697	4.55301	5.043	4.55301	4	4	52.4119	48.6384	52.4119	52	52
1958	slr0821	AP012276	1710999..1711328	330	BAL29308.1	0.410046	238.598	264.276	238.598	122	122	581.882	539.988	581.882	336	336
1959	cfxE	AP012276	complement(1711483..1712175)	693	BAL29309.1	0.487152	471.236	521.951	471.236	506	506	967.33	897.684	967.33	1173	1173
1960	slr0822	AP012276	1712328..1715189	2862	BAL29310.1	1.51116	41.9435	46.4575	41.9435	186	186	27.7559	25.7575	27.7559	139	139
1961	ycf3	AP012276	1715298..1715819	522	BAL29311.1	0.303396	66.7644	73.9495	66.7644	54	54	220.057	204.213	220.057	201	201
1962	sll0804	AP012276	complement(1715851..1717212)	1362	BAL29312.1	0.502968	25.1143	27.817	25.1143	53	53	49.9321	46.3371	49.9321	119	119
1963	sll0803	AP012276	complement(1717229..1717708)	480	BAL29313.1	0.494071	28.2358	31.2745	28.2358	21	21	57.1492	53.0345	57.1492	48	48
1964	sll0802	AP012276	complement(1717739..1718182)	444	BAL29314.1	0.511952	49.4217	54.7404	49.4217	34	34	96.5357	89.5853	96.5357	75	75
1965	ssl1498	AP012276	complement(1718275..1718460)	186	BAL29315.1	0.46361	270.647	299.774	270.647	78	78	583.782	541.75	583.782	190	190
1966	sll1263	AP012276	complement(1718563..1719495)	933	BAL29316.1	0.34308	33.2033	36.7766	33.2033	48	48	96.7799	89.8119	96.7799	158	158
1967	sll1262	AP012276	complement(1719559..1720044)	486	BAL29317.1	0.269063	94.2852	104.432	94.2852	71	71	350.421	325.191	350.421	298	298
1968	tsf	AP012276	complement(1720269..1720925)	657	BAL29318.1	0.329985	290.769	322.061	290.769	296	296	881.158	817.716	881.158	1013	1013
1969	rps2	AP012276	complement(1721079..1721888)	810	BAL29319.1	0.378856	457.35	506.57	457.35	574	574	1207.19	1120.27	1207.19	1711	1711
1970	slr1336	AP012276	1722371..1723489	1119	BAL29320.1	0.752871	108.43	120.099	108.43	188	188	144.022	133.653	144.022	282	282
1971	sll1258	AP012276	complement(1723516..1724097)	582	BAL29321.1	0.167631	21.0694	23.3369	21.0694	19	19	125.689	116.639	125.689	128	128
1972	sll1257	AP012276	complement(1724350..1724844)	495	BAL29322.1	0.84698	3.91145	4.3324	3.91145	3	3	4.61811	4.28562	4.61811	4	4
1973	sll1256	AP012276	complement(1724838..1725197)	360	BAL29323.1	#DIV/0!	0	0	0	0	0	0	0	0	0	0
1974	slr1338	AP012276	1725616..1726218	603	BAL29324.1	0.367473	43.8822	48.6048	43.8822	41	41	119.416	110.818	119.416	126	126
1975	slr1339	AP012276	1726202..1726660	459	BAL29325.1	0.444878	36.558	40.4923	36.558	26	26	82.1753	76.2588	82.1753	66	66
1976	slr1340	AP012276	1726689..1727225	537	BAL29326.1	0.225861	15.6239	17.3054	15.6239	13	13	69.175	64.1945	69.175	65	65
1977	sll1255	AP012276	complement(1727931..1728947)	1017	BAL29327.1	0.400722	6.98061	7.73186	6.98061	2	11	17.4201	16.1659	17.4201	6	31
1978	sll1254	AP012276	complement(1729085..1730125)	1041	BAL29328.1	0.571143	27.2787	30.2144	27.2787	44	44	47.7615	44.3228	47.7615	87	87
1979	slr1342	AP012276	1730230..1731567	1338	BAL29329.1	0.316366	38.1059	42.2069	38.1059	79	79	120.449	111.777	120.449	282	282
1980	slr1343	AP012276	1731728..1733242	1515	BAL29330.1	0.236366	7.66799	8.49321	7.66799	18	18	32.4411	30.1054	32.4411	86	86
1981	pcnB_1	AP012276	complement(1733301..1736129)	2829	BAL29331.1	0.63031	10.9504	12.1289	10.9504	48	48	17.373	16.1222	17.373	86	86
1982	sll1252	AP012276	complement(1736257..1737036)	780	BAL29332.1	1.16574	26.4775	29.327	26.4775	32	32	22.7131	21.0778	22.7131	31	31
1983	slr1344	AP012276	1737103..1737954	852	BAL29333.1	0.58818	18.9375	20.9755	18.9375	25	25	32.1967	29.8786	32.1967	48	48
1984	sll1251	AP012276	complement(1738049..1738939)	891	BAL29334.1	0.200766	5.79474	6.41837	5.79474	8	8	28.8632	26.7851	28.8632	45	45
1985	ssl2471	AP012276	complement(1739107..1739268)	162	BAL29335.1	0.752871	7.96777	8.82525	7.96777	2	2	10.5832	9.82121	10.5832	3	3
1986	sll1250	AP012276	complement(1739307..1739693)	387	BAL29336.1	0.376435	6.67069	7.38858	6.67069	4	4	17.7207	16.4448	17.7207	12	12
1987	panC/kcy	AP012276	complement(1739753..1741294)	1542	BAL29337.1	0.309648	21.3456	23.6427	21.3456	51	51	68.9348	63.9716	68.9348	186	186
1988	icfA_1	AP012276	1741353..1742288	936	BAL29338.1	0.428195	62.7462	69.4989	62.7462	91	91	146.536	135.986	146.536	240	240
1989	cysE	AP012276	1742362..1743111	750	BAL29339.1	1.47978	32.6997	36.2188	32.6997	38	38	22.0977	20.5067	22.0977	29	29
1990	pgi	AP012276	1743417..1745012	1596	BAL29340.1	0.550394	78.0452	86.4443	78.0452	193	193	141.799	131.589	141.799	396	396
1991	desA	AP012276	1745227..1746282	1056	BAL29341.1	0.16093	70.2838	77.8478	70.2838	115	115	436.736	405.292	436.736	807	807
1992	sll1247	AP012276	complement(1746439..1747812)	1374	BAL29342.1	1.53835	81.2608	90.006	81.2608	173	173	52.8235	49.0203	52.8235	127	127
1993	murF	AP012276	1748065..1749429	1365	BAL29343.1	0.413003	30.26	33.5166	30.26	64	64	73.2682	67.993	73.2682	175	175
1994	cytM	AP012276	complement(1749600..1749986)	387	BAL29344.1	0.759361	130.078	144.077	130.078	78	78	171.3	158.966	171.3	116	116
1995	rpl9	AP012276	complement(1750230..1750688)	459	BAL29345.1	0.557069	568.055	629.189	568.055	404	404	1019.72	946.302	1019.72	819	819
1996	slr1353	AP012276	1750870..1751745	876	BAL29346.1	0.386749	18.4186	20.4008	18.4186	25	25	47.6243	44.1954	47.6243	73	73
1997	sll1242	AP012276	complement(1751810..1753420)	1611	BAL29347.1	0.736504	174.267	193.022	174.267	435	435	236.614	219.578	236.614	667	667
1998	slr1956	AP012276	1753553..1754071	519	BAL29348.1	0.41606	17.4093	19.2829	17.4093	14	14	41.8433	38.8307	41.8433	38	38
[truncated: 1,579 more rows]
