# Supplementary material for: Biosynthesis of a sulfated exopolysaccharide, synechan, and bloom formation in the model cyanobacterium Synechocystis sp. strain PCC 6803
Source: eLife. 2021 Jun 15;10:e66538. doi: 10.7554/eLife.66538 (PMC8205485; doi:10.7554/eLife.66538)
Supplement: Supplementary file 1. — Function: GT, glycosyltransferase; ST, sulfotransferase; PCP, polysaccharide co-polymerase; OPX, outer-membrane polysaccharide export protein. Regulation: transcriptional regulation of xss genes by XssQ/R/S. n.d., not determined. [file elife-66538-supp1.xlsx]

## Sheet: Sheet1
Category	Name	Locus tag	Function	Regulation
Polysaccharide chain biosynthesis	XssP	sll5057	Priming GT	+
	XssB	sll5043	GT	+
	XssM	slr5054	GT	－
	XssN	slr5055	GT	+
	XssC	sll5044	GT	+
	XssG	sll5048	GT	－
	XssI	sll5050	GT	－
	XssO	slr5056	GT	+
Modification	XssA	sll5043	ST	+
	XssE	sll5046	ST	+
Translocation	XssH	sll5049	Wzx/Flippase	－
Polymerization and exportation	XssF	sll5047	Wzy/Polymerase	－
	XssK	sll5052	PCP-2a/Exporter	－
	XssT	sll1581	OPX/Exporter	－
Regulation	XssQ	slr5058	STAND, Transcriptional regulator	n.d.
	XssR	sll5059	Response regulator	n.d.
	XssS	sll5060	Sensor histidine kinase	n.d.
