# Supplementary material for: Biosynthesis of a sulfated exopolysaccharide, synechan, and bloom formation in the model cyanobacterium Synechocystis sp. strain PCC 6803
Source: eLife. 2021 Jun 15;10:e66538. doi: 10.7554/eLife.66538 (PMC8205485; doi:10.7554/eLife.66538)
Supplement: Supplementary file 2. — Classification: ST, sulfotransferase; GT, glycosyltransferase; PCP, polysaccharide co-polymerase; OPX, outer-membrane polysaccharide export protein. Total sugar content of the EPS fraction is expressed as µg glucose/1 × 108 cells. The errors are based on SD (n = 3). *Close to the detection limit. EPS accumulation ratio, percent of WT grown at 31°C. Bloom formation is summarized from Figure 2. [file elife-66538-supp2.xlsx]

## Sheet: Sheet1
Strain name	Classification	Glc (μg) per 1.0 × 108 cells	Ratio (% WT)	Bloom
WT(31ºC)		0.526 ± 0.062	100	+
WT(20ºC)		1.629 ± 0.472	309.9	+
ΔxssA	ST3	0.054 ± 0.042	10.4	-
ΔxssB	GT2	0.040 ± 0.029	7.7	-
ΔxssC	GT25	0.148 ± 0.020	28.0944	+
ΔxssE	ST3	0.402 ± 0.127	76.6*	+
ΔxssF	Wzy / polymerase	0.107 ± 0.008	20.2887	-
ΔxssG	GT4	0.105 ± 0.018	20.0719	+
ΔxssH	Wzx / Flippase	0.112 ± 0.059	23.0128	-
ΔxssI	GT4	0.113 ± 0.044	21.5727	+
ΔxssJ	-	0.224 ± 0.025	42.6	+
ΔxssK	PCP2a	0.037 ± 0.012	7	-
ΔxssM	GT2	0.049 ± 0.025	14.5848	-
ΔxssN	GT26	0.115 ± 0.025	21.809	-
ΔxssO	GT2	0.161 ± 0.025	30.5725	+
ΔxssP	Priming GT	0.039 ± 0.010	7.4	-
ΔxssQ	Transcriptional regulator	0.036± 0.010	6.8	-
ΔxssR	Response regulator	0.059 ± 0.009	11.1856	-
ΔxssS	Histidine kinase	9.770 ± 0.524	1860	++
ΔxssR-S		0.062 ± 0.008	11.808	-
ΔxssK~M+ΔxssS		0.044 ± 0.013	8.4	-
OX-xssR		10.426 ± 0.225	1984	++
OX-xssQ		7.359 ± 2.36	1400	++
ΔxssQ+OX-xssR		0.077 ± 0.027	14.6	-
ΔxssR+OX-xssQ		4.837 ± 2.169	920	+
Δsll1581 (xssT)	OPX / exporter	0.103 ± 0.012	19.6	-
