# Supplementary material for: Biosynthesis of a sulfated exopolysaccharide, synechan, and bloom formation in the model cyanobacterium Synechocystis sp. strain PCC 6803
Source: eLife. 2021 Jun 15;10:e66538. doi: 10.7554/eLife.66538 (PMC8205485; doi:10.7554/eLife.66538)
Supplement: Supplementary file 3. [file elife-66538-supp3.xlsx]

## Sheet: Sheet1
Habitat	Species	STs	Comment
Marine	Trichodesmium erythraeum IMS101	30	Iron adsorption? (Rubin et al., 2011)*
Marine	Crocosphaera subtropica ATCC 51142	14	Formerly Cyanothece sp. ATCC 51142
Marine	Acaryochloris marina MBIC 11017	13	Far-red light induction (Hernández‐Prieto et al., 2017)
Marine	Synechococcus sp. WH8102	12
Marine	Pseudanabaena sp. PCC 7367	8
Marine	Rivularia sp. PCC 7116	5
Marine	Synechococcus sp. PCC 7002	4
Marine	Prochlorococcus marinus MIT 9313	2
Marine	Nodularia spumigena UHCC 0039	0
Salt lake	Arthrospira platensis NIES-39	16	Spirulan? (Hayashi et al., 1996)*
Salt lake	Acaryochloris sp. CCMEE 5410	6
Terrestrial (rice field)	Gloeothece verrucosa PCC 7822	17	Formerly Cyanothece sp. PCC 7822
Terrestrial (rice field)	Rippkaea orientalis PCC 8801	8	Formerly Cyanothece sp. PCC 8801
Terrestrial (rice field)	Cyanothece sp. PCC 7425	6
Terrestrial	Gloeobacter violaceus PCC 7421	10
Terrestrial	Oscillatoria nigro-viridis PCC 7112	10
Terrestrial	Leptolyngbya sp. PCC 7376	8
Terrestrial	Oscillatoria acuminata PCC 6304	6
Terrestrial	Cylindrospermum stagnale PCC 7417	3
Terrestrial	Microcoleus sp. PCC 7113	2
Terrestrial	Crinalium epipsammum PCC 9333	2
Terrestrial	Nostoc punctiforme NIES-2108	1
Terrestrial	Nostoc sp. HK-01	1
Terrestrial	Nostoc punctiforme PCC 73102	0
Terrestrial	Chroococcidiopsis thermalis PCC 7203	0
Hot spring	Pleurocapsa sp. PCC 7327	10
Hot spring	Thermoleptolyngbya sp. O-77	7
Hot spring	Thermosynechococcus elongatus BP-1	0
Hot spring	Thermosynechococcus vulcanus NIES-2134	0
Hot spring	Synechococcus sp. JA-3-3Ab	0
Fresh water	Synechocystis sp. PCC 6803	2	Salt tolerant (Kopf et al. , 2014a)*
Fresh water	Synechocystis sp. PCC 6714	0	Salt sensitive (Kopf et al. , 2014a)*
Fresh water	Microcystis aeruginosa NIES-843	9	Sulfated EPS? (Liu et al., 2015)
Fresh water	Aphanothece sacrum	11	Sacran (Okajima et al., 2008)*
Fresh water	Anabaena cylindrica PCC 7122	4
Fresh water	Calothrix sp. PCC 7507	3
Fresh water	Synechococcus elongatus PCC 7942	0	Salt sensitive
Fresh water	Nostoc (Anabaena) sp. PCC 7120	0
Fresh water	Leptolyngbya boryana IAM M-101	0
Fresh water	Anabaena variabilis ATCC 29413	0
Fresh water	Calothrix sp. PCC 6303	0
Fresh water	Calothrix sp. 336/3	0
Rubin M, Berman-Frank I, Shaked Y. 2011. Dust-and mineral-iron utilization by the marine dinitrogen-fixer Trichodesmium. Nature Geoscience 4:529-534
Hernández-Prieto MA, Li Y, Postier BL, Blankenship RE, Chen M. 2018. Far-red light promotes biofilm formation in the cyanobacterium Acaryochloris marina. Environmental Microbiology 20:535–545.
Hayashi T, Hayashi K, Maeda M, Kojima I. 1996. Calcium spirulan, an inhibitor of enveloped virus replication, from a blue-green alga Spirulina platensis. Journal of Natural Products 59:83-87
Kopf M, Klähn S, Pade N, Weingärtner C, Hagemann M, Voß B, Hess WR. 2014. Comparative genome analysis of the closely related Synechocystis strains PCC 6714 and PCC 6803. DNA research 21:255-266
Liu L, Qin B, Zhu G, Zhang Y, Gao G, Gong Z, Huang Q. 2015. Distribution of dissolved acidic polysaccharides (dAPS) during cyanobacteria blooms in northern Lake Taihu. Limnology 16:21-29
Okajima MK, Bamba T, Kaneso Y, Hirata K, Fukusaki E, Kajiyama Si, Kaneko T. 2008. Supergiant ampholytic sugar chains with imbalanced charge ratio form saline ultra-absorbent hydrogels. Macromolecules 41:4061-4064
