# Supplementary material for: Biosynthesis of a sulfated exopolysaccharide, synechan, and bloom formation in the model cyanobacterium Synechocystis sp. strain PCC 6803
Source: eLife. 2021 Jun 15;10:e66538. doi: 10.7554/eLife.66538 (PMC8205485; doi:10.7554/eLife.66538)
Supplement: Supplementary file 4. — Transcriptional level is given as RPKM (reads per kilobase of exon per million mapped reads). [file elife-66538-supp4.xlsx]

## Sheet: Sheet1
Locas tag	Gene name	PCC-P (RPKM)	GT-I (RPKM)	PCC-P / GT-I
sll5042	xssA	46.7007	28.4729	1.64018
sll5043	xssB	43.1567	9.84332	4.38437
sll5044	xssC	53.2798	4.45087	11.9706
ssl5045	xssD	77.5878	6.24581	12.4224
sll5046	xssE	291.816	24.0375	12.14
sll5047	xssF	17.8566	8.65896	2.06221
sll5048	xssG	71.7099	28.8632	2.48447
sll5049	xssH	41.7774	21.2608	1.96499
sll5050	xssI	26.7695	33.6172	0.796306
slr5051	xssJ	231.552	111.972	2.06795
sll5052	xssK	29.0323	23.6515	1.22751
slr5053	xssL	43.904	6.4795	6.77584
slr5054	xssM	33.2473	22.5133	1.47679
slr5055	xssN	455.521	14.4316	31.5641
slr5056	xssO	120.51	23.3432	5.16254
sll5057	xssP	514.146	12.58	40.8701
slr5058	xssQ	54.3312	27.4569	1.97878
sll5059	xssR	40.4699	45.8954	0.881787
sll5060	xssS	12.8011	11.6502	1.09878
sll1581	xssT	133.338	181.821	0.733346
