# Supplementary material for: Biosynthesis of a sulfated exopolysaccharide, synechan, and bloom formation in the model cyanobacterium Synechocystis sp. strain PCC 6803
Source: eLife. 2021 Jun 15;10:e66538. doi: 10.7554/eLife.66538 (PMC8205485; doi:10.7554/eLife.66538)
Supplement: Supplementary file 5. [file elife-66538-supp5.xlsx]

## Sheet: Sheet1
Product (purpose)	Primer name	Sequence (5' => 3')
Antibiotic resistance cassette	Sp-1F	ATGCGCGAAGCCGTGATTGCC
	Sp-2R	TAGTAAAGCCCTCGCTAG
	Km-1Fup	AATTCCCCTGCTCGCGCTGCCGCAAGCACTCAGGG
	Km-2Rcom	AATATTGCGAAGCGGCCAACCTTTCATAGAAGGCG
	Cm-1Fup	AATTCCCCTGCTCGCGCAGCGCTGATGTCCGGCGGTGCT
	Cm-2Rcom	AATATTGCGAAGCGGCTAACCGTTTTTATCAGGC
Glycosyltransferase disruption	slr1943-1FpS	AACGACGGCCAGTGAAGACCGCATGTGTGGCAGT
	slr1943-2Rup	GCGAGCAGGGGAATTGGCTTGGTGAATTTGTAACC
	slr1943-3Fcom	CCGCTTCGCAATATTGGCTGGCTTTGAACAACTTC
	slr1943-4RpS	AAACAGCTATGACCAATCGGCAATGTAGGTGAAGG
	slr1943-5F	AAGCCCGTCTGGAGTTTG
	slr1943-6R	AATCCGGGTCGATGGTAC
	slr1063-1FpS	AACGACGGCCAGTGAATGTCCAAAAATGACAAGC
	slr1063-2Rup	GCGAGCAGGGGAATTACACGATTGGCGGAAATTTC
	slr1063-3Fcom	CCGCTTCGCAATATTCTGGTATATCAGATTACTCG
	slr1063-4RpS	AAACAGCTATGACCAGCTTGGAGTAAGCTGCATAA
	slr1063-5F	ATGCGTCGTTTCGGTCAC
	slr1063-6R	TGCAAGACATTCCCGGAC
	sll0501-1FpS	AACGACGGCCAGTGAGGGATTAGGCAGGGGTAATA
	sll0501-2Rup	GCGAGCAGGGGAATTCCTGTCAATTTAGTCAGTGC
	sll0501-3Fcom	CCGCTTCGCAATATTGACCATTGAACTGTCTATTGTG
	sll0501-4RpS	AAACAGCTATGACCAGGTCAGAATCGATACCATGG
	sll0501-5F	TCAAAGGGAACGTGCTGG
	sll0501-6R	GTTGCCTTGGGCGTAATC
	slr1118-1FpS	AACGACGGCCAGTGATCCTGCCGCTCAAAGTATTC
	slr1118-2Rup	GCGAGCAGGGGAATTCGATCGCCGCTTTAGCTAAA
	slr1118-3Fcom	CCGCTTCGCAATATTTCAAGCTCCCCGTTGGTTAA
	slr1118-4RpS	AAACAGCTATGACCAGCAGGGGAAATCGTTTGCAT
	slr1118-5F	CGCACCATTATCAGCACG
	slr1118-6R	ATCGCTTCGGTTCCATGC
	sll5052_54-1FpS	AACGACGGCCAGTGATCGCTGTTTGTTTGGTGAGG
	sll5052_54-2Rup	GCGAGCAGGGGAATTCAATGCTGGCTTGGCCAAATTA
	sll5052_54-3Fcom	CCGCTTCGCAATATTGCTGCTGGATTCAGGAATTG
	sll5052_54-4RpS	AAACAGCTATGACCACAGGCGGGAGATTGCTAAAA
	sll5052_54-5F	GGTACTTCGCTGTAGTTC
	sll5052_54-6R	GGGCAAAACTTCGTCTTC
xss gene disruption and overexpression	xssA-1FpS	AACGACGGCCAGTGACCCCAGCTTGTAGTGGATTG
	xssA-2Rup	GCGAGCAGGGGAATTTTCATGCCGCCGATAATGAT
	xssA-3Fcom	CCGCTTCGCAATATTAGAAATGTGCCACCAGTACCC
	xssA-4RpS	AAACAGCTATGACCAATCTAGGTTCGACCCCTACC
	xssA-5Ftrc	GAGGAATAAACCATGAAATGTGCCACCAGTACC
	xssA-6F	GATCGCCAATGGCAAGAT
	xssA-7R	ATTGGGTTCCTTCAGCGA
	xssB-1FpS	AACGACGGCCAGTGAGAGCGTGTTTGAAAAGCCCC
	xssB-2Rup	GCGAGCAGGGGAATTGGCCATAATCTTGCAAATACTC
	xssB-3Fcom	CCGCTTCGCAATATTAGGCCATAATTGCTTCAAACAATAG
	xssB-4RpS	AAACAGCTATGACCAGAAATTCTACTCCGGACGGT
	xssB-5Ftrc	GAGGAATAAACCATGGCCATAATTGCTTCAAACAA
	xssB-6F	GCCAACAAAATCCCCAGA
	xssB-7R	AATCCACTACAAGCTGGG
	xssC-1FpS	AACGACGGCCAGTGAAGGCTACTGGGTTTGAGGTT
	xssC-2Rup	GCGAGCAGGGGAATTATCATTTCCCGACGGCGATC
	xssC-3Fcom	CCGCTTCGCAATATTAGATCCAAGAGTTTCAGCGGTT
	xssC-4RpS	AAACAGCTATGACCACCGCACAATGGTATCGCTAT
	xssC-5F	CATTACTTTTTCCCCGCC
	xssC-6R	CCGCTGTAAAAAATGCAGC
	xssE-1FpS	AACGACGGCCAGTGACCGTCGAGCGAGTTAAGG
	xssE-2Rup	GCGAGCAGGGGAATTAAGTGTTCATGGGGGCGTGA
	xssE-3Fcom	CCGCTTCGCAATATTTAGAACACTTCTTTCCTCGAAT
	xssE-4RpS	AAACAGCTATGACCAGCTCTTAGGGCGGGGAAAA
	xssE-5Ftrc	AAGGAGGAATAAACCATGAACACTTCTTTCCTCGAAT
	xssE-6F	TAGTGAGCAGGGGAAACT
	xssE-7R	CACTTACCTGATCGATGAC
	xssF-1FpS	AACGACGGCCAGTGACTGCAAAAACGAGGCCATGA
	xssF-2Rup	GCGAGCAGGGGAATTGTCATGGATCGTTTGCTGTTG
	xssF-3Fcom	CCGCTTCGCAATATTAGACCCCCCAAGCCCAACTG
	xssF-4RpS	AAACAGCTATGACCAATAGACCCGATTGCGTTTCC
	xssF-5F	CCCATGATGTTGTGGTGT
	xssF-6R	TTGCCTGACCCTGACTTT
	xssG-1FpS	AACGACGGCCAGTGACTCCACGGCATTATTTACCC
	xssG-2Rup	GCGAGCAGGGGAATTCATACTCCTAACTCCATAACGC
	xssG-3Fcom	CCGCTTCGCAATATTAGAAAATCACCTTTGTTTTACCCTA
	xssG-4RpS	AAACAGCTATGACCATCATGGATCGTTTGCTGTTGC
	xssG-5F	ATCTAGCAGTGGCTTACG
	xssG-6R	CCGAAGCCATTGGCTAAT
	xssH-1FpS	AACGACGGCCAGTGAGCTGAAAACCCTCGGCTTAA
	xssH-2Rup	GCGAGCAGGGGAATTCATAGTTACGGCGCCGATG
	xssH-3Fcom	CCGCTTCGCAATATTAGGCTTCCCTCAATAAACTGG
	xssH-4RpS	AAACAGCTATGACCATTGGCAAAGTTACCGATCGC
	xssH-5F	GTAGAAGCAATGCAGTCTG
	xssH-6R	GGTATTTACCAACGCCATC
	xssI-1FpS	AACGACGGCCAGTGACCAATTTGCAACATCCCGAC
	xssI-2Rup	GCGAGCAGGGGAATTTAGCCCCGAATCAATTATCC
	xssI-3Fcom	CCGCTTCGCAATATTAGGTGAGATCGCCCCAATTCC
	xssI-4RpS	AAACAGCTATGACCAAATGTTGCTGCACCATGGC
	xssI-5F	AATTCGGTCTAGCTTGCC
	xssI-6R	GCTCTTCCAAAGCCAGAA
	xssK-1FpS	AACGACGGCCAGTGATCTGCCACTTGGTAAACCTC
	xssK-2Rup	GCGAGCAGGGGAATTGGAATATTCGGGCGCTTTGA
	xssK-3Fcom	CCGCTTCGCAATATTTGGTGCGGGTTTATCTCAAC
	xssK-4RpS	AAACAGCTATGACCAGCAGATTGTTCCGTTTTTGAA
	xssK-5F	CGCTCCCATAAAGATCTC
	xssK-6R	TTCTGGAATCTGGGGGAGAA
	xssM-1FpS	AACGACGGCCAGTGATCGCTGTTTGTTTGGTGAGG
	xssM-2Rup	GCGAGCAGGGGAATTCAATGCTGGCTTGGCCAAAT
	xssM-3Fcom	CCGCTTCGCAATATTCTTCCATGGTGGTTAGTGGA
	xssM-4RpS	AAACAGCTATGACCACAGGCGGGAGATTGCTAAAA
	xssM-5F	CTGATAGGCTGTTGCTAACC
	xssM-6R	GCAGTTGTTTATGGACCCTC
	xssN-1FpS	AACGACGGCCAGTGAGGAATTGTCGTTATTGGGCG
	xssN-2Rup	GCGAGCAGGGGAATTTGGAATTCATTGCTTAGCCC
	xssN-3Fcom	CCGCTTCGCAATATTAGAATTCCATCACGCTTCTCAA
	xssN-4RpS	AAACAGCTATGACCATATAGGACAGGGCGATCTTC
	xssN-5Ftrc	GAGGAATAAACCATGAATTCCATCACGCTTCTCAA
	xssN-6F	TCCGCCTCACCAAACAAA
	xssN-7R	GCCACTTGGTAAACCTCT
	xssO-1FpS	AACGACGGCCAGTGAGTTAGCCTGGCTCTATGCCA
	xssO-2Rup	GCGAGCAGGGGAATTAACACCTAAACGGTCCGAGA
	xssO-3Fcom	CCGCTTCGCAATATTAGTTTCGGGGTTGCCTAGCCAA
	xssO-4RpS	AAACAGCTATGACCAAATAGCGGCTTTCAGCAACC
	xssO-5F	ATGAGCAAAGTCGGGTTG
	xssO-6R	GGAGAATGAAACGAGACC
	xssP-1FpS	AACGACGGCCAGTGACCTCTGCTTCAGATAAAGCTG
	xssP-2Rup	GCGAGCAGGGGAATTGCCATAGGTAATCACCAAGGAG
	xssP-3Fcom	CCGCTTCGCAATATTAGGCTAGCACTATTCAACTGATTG
	xssP-4RpS	AAACAGCTATGACCATTCTCACCCACTCGGGTGTA
	xssP-5Ftrc	GAGGAATAAACCATGGCTAGCACTATTCAACTGA
	xssP-6F	CTGGTGAAGCTTTAAGGG
	xssP-7R	AAAATCGAACACCAGCCG
	xssQ-1Rup	GCGAGCAGGGGAATTGCCATGTTTACAATGATAGAGA
	xssQ-2Fcom	CCGCTTCGCAATATTAGGCAAAACGTTCCCTTAAAGCT
	xssQ-3Ftrc	GAGGAATAAACCATGGCAAAACGTTCCCTTAAAG
	xssQ-4Rrrn	CAGACCGCTTCTGCGTTAGCTAACCTTTTCGCC
	xssR-1FpS	AACGACGGCCAGTGAGGAGGAAGTAGATGGGTTAC
	xssR-2Rup	GCGAGCAGGGGAATTGTCGGAGAAGTCTCAGTCAT
	xssR-3Fcom	CCGCTTCGCAATATTCAGCAATTGCGACAGTTTCC
	xssR-4RpS	AAACAGCTATGACCAACGTTAACAGCGCCGTTGTT
	xssR-5F	CAGACGGAGCAACCTTTT
	xssR-6R	GGAAACTGTCGCAATTGC
	xssR-7Ftrc	GAGGAATAAACCATGACTGAGACTTCTCCG
	xssR-8Rrrn	CAGACCGCTTCTGCGCTACCCCATGACCAGGGC
	xssS-1Rup	GCGAGCAGGGGAATTACCTGCAAAAAGGTTGCTCC
	xssS-2Fcom	CCGCTTCGCAATATTCGGGGGTTGATGGACAATAT
sll1581 disruption	sll1581-1FpS	AACGACGGCCAGTGATGGCTTTTCAGGCAATTCCG
	sll1581-2Rup	GCGAGCAGGGGAATTTTCCAAGTTCAAGGCCACCA
	sll1581-3Fcom	CCGCTTCGCAATATTCAGAGTGAACTCATAACCCA
	sll1581-4RpS	AAACAGCTATGACCATCTGCCTGTAATCTCTGCAC
	sll1581-5F	ATCTGGTGGCCTTGAACT
	sll1581-6R	TTCAGTTGCTTGCAGGCA
RT-qPCR	rnpB-1F	GAGAGTTAGGGAGGGAGTTGC
	rnpB-2R	AAGGGCGGTATTTTTCTGTG
	xssA-8F	TTGCCCACCTACCCTGACAC
	xssA-9R	AGGCGATCGATGGGATGACG
	xssB-8F	CGGCCAGGGGCAATTCAAAC
	xssB-9R	ATTTGGGGAGTGCCATCGGG
	xssE-8F	CAACGCGGCTATGAAGCCAG
	xssE-9R	GCCCCGTAACGCTGTAAACG
	xssF-7F	GCTGGAAACGCAATCGGGTC
	xssF-8R	GTTCAGCAGGCCAAAGGCTC
	xssH-7F	CCGCAATCGCTTTACCTGGG
	xssH-8R	GGCGAGAAAGGTCATGGCTG
	xssK-7F	ATTTCCCACCATTGCGGCTC
	xssK-8R	CAAGGGACATCCTGTTGGGC
	xssM-7F	GCCATGTTCGTGCTGGGTTC
	xssM-8R	GCCCAGAACCAAATACTGCGG
	xssN-8F	GCAAAGTCGGGTTGGAGTGG
	xssN-9R	CCAAGGCAAAGAACGGTAGGC
	xssP-8F	CGGCTTAACCGGAGAATGGC
	xssP-9R	CCCAAGCTCCAGCGTTTCTG
EMSA	xssEup-1F	AGGAAAGAAGTGTTCATGGG
	xssEup-2R	ATCTTTAAAGCCCCAGTCCC
	xssQ-5F28a	TATTTTCAGAGCCATATGGCAAAACGTTCCCTTA
	xssQ-6R28a	CTCGAATTCGGATCCTTAGCTAACCTTTTCGCC
	pET28a-1R	CATATGGCTCTGAAAATACAG
	pET28a-2F	GGATCCGAATTCGAGCTC
