# Supplementary material for: Biosynthesis of a sulfated exopolysaccharide, synechan, and bloom formation in the model cyanobacterium Synechocystis sp. strain PCC 6803
Source: eLife. 2021 Jun 15;10:e66538. doi: 10.7554/eLife.66538 (PMC8205485; doi:10.7554/eLife.66538)
Supplement: Supplementary file 6. — *Almost complete segregation. #Partial segregation. [file elife-66538-supp6.xlsx]

## Sheet: Sheet1
Strain name		Design
Δslr1943		Complete deletion by SpR
Δslr1063		Complete deletion by SpR
Δsll0501		Complete deletion by SpR
Δslr1118		Complete deletion by SpR
Δslr5054		Partial deletion by SpR (=ΔxssK~M)
ΔxssA		Replacement of the the start codon by SpR and stop codon
ΔxssB		Replacement of the the start codon by SpR and stop codon
ΔxssC		Replacement of the the start codon by SpR and stop codon
ΔxssE		Replacement of the the start codon by SpR and stop codon
ΔxssF		Replacement of the the start codon by SpR and stop codon
ΔxssG		Replacement of the the start codon by SpR and stop codon
ΔxssH		Replacement of the the start codon by SpR and stop codon
ΔxssI		Replacement of the the start codon by SpR and stop codon
ΔxssJ		Replacement of the the start codon by SpR and stop codon
ΔxssK		Replacement of the the start codon by SpR and stop codon
ΔxssM		Replacement of the the start codon by SpR and stop codon
ΔxssN		Replacement of the the start codon by SpR and stop codon
ΔxssO		Replacement of the the start codon by SpR and stop codon
ΔxssP		Replacement of the the start codon by SpR and stop codon
ΔxssQ		Replacement of the the start codon by SpR and stop codon
ΔxssR*		Partial deletion by SpR
ΔxssS*		Partial deletion by SpR
ΔxssR-S*		Partial deletion by SpR
ΔxssK~M + ΔxssS*		xssK~M::SpR + xssS::CmR
OX-xssR#		slr0846_platform-KmR-Ptrc-XssS-TrrnB
OX-xssQ#		IS203_platform-CmR-Ptrc-XssQ-TrrnB
ΔxssQ + OX-xssR		Simple combination
ΔxssR*+OX-xssQ#		Simple combination
OX-xssP#		Replacement of the the native promoter to CmR-Ptrc
ΔxssT		Complete deletion by KmR
